# Supplementary material for: Gene age and genome organization in Escherichia coli and Bacillus subtilis
Source: Front Microbiol. 2025 Jun 18;16:1512923. doi: 10.3389/fmicb.2025.1512923 (PMC12218254; doi:10.3389/fmicb.2025.1512923)
Supplement: Supplementary file 5 [file Data_Sheet_4.xlsx]

## Sheet: RegulonDB vs Uniprot noRNA
Gene name (RDB)	Phylostratum	locus	RDB ID	Left-End-Position	Right-End-Position	direction	Pseudogene comment	Database discrepancies	Product (Uniprot)	Protein length	description (RDB)	Uniprot ID	Biofilm (EcoCyc/GO term)	Prophages
thrL	No age assigned	b0001	ECK120001251	190	255	forward			thr operon leader peptide (thr operon attenuator)	21	thr operon leader peptide	P0AD86																	0	0	0	0
thrA	1	b0002	ECK120000987	337	2799	forward			Bifunctional aspartokinase/homoserine dehydrogenase 1 (Aspartokinase I/homoserine dehydrogenase I) (AKI-HDI) [Includes: Aspartokinase (EC 2.7.2.4); Homoserine dehydrogenase (EC 1.1.1.3)]	820	aspartate kinase / homoserine dehydrogenase	P00561																	CP4-6	0	0	29
thrB	1	b0003	ECK120000988	2801	3733	forward			Homoserine kinase (HK) (HSK) (EC 2.7.1.39)	310	homoserine kinase	P00547																	(DLP12)	0	0	8
thrC	1	b0004	ECK120000989	3734	5020	forward			Threonine synthase (TS) (EC 4.2.3.1)	428	threonine synthase	P00934																	CP4-57	0	0	22
yaaX	1	b0005	ECK120002701	5234	5530	forward			Uncharacterized protein YaaX	98	putative protein	P75616																	e14	0	0	23
yaaA	1	b0006	ECK120000009	5683	6459	reverse			UPF0246 protein YaaA	258	protein that reduces intracellular iron levels under peroxide stress	P0A8I3																	Rac	0	0	27
yaaJ	1	b0007	ECK120001508	6529	7959	reverse			Uncharacterized transporter YaaJ	476	putative transport protein YaaJ	P30143																	#N/A	0	0	0
talB	1	b0008	ECK120001509	8238	9191	forward			Transaldolase B (EC 2.2.1.2)	317	transaldolase B	P0A870																	Qin	0	0	34
mog	1	b0009	ECK120001467	9306	9893	forward			Molybdopterin adenylyltransferase (MPT adenylyltransferase) (EC 2.7.7.75)	195	molybdopterin adenylyltransferase	P0AF03																	CPZ-55	0	0	9
satP	1	b0010	ECK120001468	9928	10494	reverse			Succinate-acetate/proton symporter SatP (Succinate-acetate transporter protein)	188	acetate / succinate:H<sup>+</sup> symporter	P0AC98																	(CP4-6)	0	0	10
yaaW	1	b0011	ECK120002702	10643	11356	reverse			UPF0174 protein YaaW	237	conserved protein	P75617																	DLP12	0	0	25
htgA	9	b0012	ECK120001465	10830	11315	forward			Uncharacterized protein MbiA (Modifier of biofilm)	161	predicted DNA-binding transcriptional regulator	P28697																	(e14)	0	0	1
yaaI	1	b0013	ECK120000235	11382	11786	reverse			UPF0412 protein YaaI	134	putative protein	P28696																	(Rac)	0	0	4
dnaK	1	b0014	ECK120002604	12163	14079	forward			Chaperone protein DnaK (HSP70) (Heat shock 70 kDa protein) (Heat shock protein 70)	638	chaperone protein DnaK	P0A6Y8																	(Qin)	0	0	4
dnaJ	1	b0015	ECK120002704	14168	15298	forward			Chaperone protein DnaJ (HSP40) (Heat shock protein J)	376	chaperone protein DnaJ	P08622																	CP4-44	0	0	9
insL-1	1	b0016	ECK120000366	15445	16557	forward			Putative transposase InsL for insertion sequence element IS186A	370	IS186/IS421 transposase	P0CF91																	(CP4-44)	0	0	3
mokC	2	b0018	ECK120002653	16751	16960	reverse			Regulatory protein MokC	69	regulatory peptide whose translation enables hokC (gef) expression	P33236																	CPS-53	0	0	15
hokC	2	b4412	ECK120002652	16751	16903	reverse			Toxic protein HokC (Protein Gef)	50	HokC, Gef toxin; interferes with membrane function when in excess	P0ACG4																	(CPS-53)	0	0	2
nhaA	1	b0019	ECK120001066	17489	18655	forward			Na(+)/H(+) antiporter NhaA (Sodium/proton antiporter NhaA)	388	Na<sup>+</sup>:H<sup>+</sup> antiporter NhaA	P13738																	(CP4-57)	0	0	5
nhaR	1	b0020	ECK120023911	18715	19620	forward			Transcriptional activator protein NhaR (Na(+)/H(+) antiporter regulatory protein)	301	NhaR transcriptional activator	P0A9G2
insB-1	1	b0021	ECK120002705	19811	20314	reverse			Insertion element IS1 1 protein InsB (IS1a)	167	IS1 protein InsB	P0CF25
insA-1	1	b0022	ECK120002706	20233	20508	reverse			Insertion element IS1 1 protein InsA (IS1a)	91	IS1 protein InsA	P0CF07
rpsT	1	b0023	ECK120000910	20815	21078	reverse			30S ribosomal protein S20 (Small ribosomal subunit protein bS20)	87	30S ribosomal subunit protein S20	P0A7U7
yaaY	9	b0024	ECK120002707	21181	21399	forward			Uncharacterized protein YaaY	72	putative protein	P75620
ribF	1	b0025	ECK120001067	21407	22348	forward			Riboflavin biosynthesis protein RibF [Includes: Riboflavin kinase (EC 2.7.1.26) (Flavokinase); FMN adenylyltransferase (EC 2.7.7.2) (FAD pyrophosphorylase) (FAD synthase)]	313	bifunctional riboflavin kinase / FMN adenylyltransferase	P0AG40
ileS	1	b0026	ECK120000485	22391	25207	forward			Isoleucine--tRNA ligase (EC 6.1.1.5) (Isoleucyl-tRNA synthetase) (IleRS)	938	isoleucine-tRNA ligase	P00956
lspA	1	b0027	ECK120000541	25207	25701	forward			Lipoprotein signal peptidase (EC 3.4.23.36) (Prolipoprotein signal peptidase) (Signal peptidase II) (SPase II)	164	prolipoprotein signal peptidase II	P00804
fkpB	1	b0028	ECK120001068	25826	26275	forward			FKBP-type 16 kDa peptidyl-prolyl cis-trans isomerase (PPIase) (EC 5.2.1.8) (Rotamase)	149	peptidyl-prolyl <i>cis-trans</i> isomerase	P0AEM0
ispH	1	b0029	ECK120001069	26277	27227	forward			4-hydroxy-3-methylbut-2-enyl diphosphate reductase (HMBPP reductase) (EC 1.17.7.4) (1-hydroxy-2-methyl-2-(E)-butenyl 4-diphosphate reductase)	316	1-hydroxy-2-methyl-2-(E)-butenyl 4-diphosphate reductase	P62623
rihC	1	b0030	ECK120000200	27293	28207	forward			Non-specific ribonucleoside hydrolase RihC (EC 3.2.-.-) (Purine/pyrimidine ribonucleoside hydrolase)	304	ribonucleoside hydrolase 3	P22564
dapB	1	b0031	ECK125203390	28374	29195	forward			4-hydroxy-tetrahydrodipicolinate reductase (HTPA reductase) (EC 1.17.1.8)	273	4-hydroxy-tetrahydrodipicolinate reductase	P04036
carA	1	b0032	ECK120000130	29651	30799	forward			Carbamoyl-phosphate synthase small chain (EC 6.3.5.5) (Carbamoyl-phosphate synthetase glutamine chain)	382	carbamoyl phosphate synthetase, &alpha; chain	P0A6F1
carB	1	b0033	ECK120000131	30817	34038	forward			Carbamoyl-phosphate synthase large chain (EC 6.3.5.5) (Carbamoyl-phosphate synthetase ammonia chain)	1073	carbamoyl phosphate synthetase, &beta; chain	P00968
caiF	7	b0034	ECK120002708	34300	34695	forward			Transcriptional activatory protein CaiF	131	CaiF transcriptional activator	P0AE58
caiE	1	b0035	ECK120002330	34781	35371	reverse			Carnitine operon protein CaiE	196	predicted acyl transferase	P39206
caiD	1	b0036	ECK120001510	35377	36162	reverse			Carnitinyl-CoA dehydratase (EC 4.2.1.149) (Crotonobetainyl-CoA hydratase)	261	crotonobetainyl-CoA hydratase	P31551
caiC	1	b0037	ECK120001511	36271	37824	reverse			Crotonobetaine/carnitine--CoA ligase (EC 6.2.1.48) (Betaine:CoA ligase)	517	carnitine-CoA ligase	P31552
caiB	1	b0038	ECK120001512	37898	39115	reverse			L-carnitine CoA-transferase (EC 2.8.3.21) (Crotonobetainyl-CoA:carnitine CoA-transferase)	405	&gamma;-butyrobetainyl-CoA:carnitine CoA transferase	P31572
caiA	1	b0039	ECK120001513	39244	40386	reverse			Crotonobetainyl-CoA reductase (EC 1.3.8.13) (Crotobetaine reductase) (Crotonobetainyl-CoA dehydrogenase)	380	crotonobetainyl-CoA reductase	P60584
caiT	1	b0040	ECK120001514	40417	41931	reverse			L-carnitine/gamma-butyrobetaine antiporter	504	L-carnitine : &gamma;-butyrobetaine antiporter	P31553
fixA	1	b0041	ECK120001515	42403	43173	forward			Protein FixA	256	predicted elecron transfer flavoprotein subunit, ETFP adenine nucleotide-binding domain	P60566
fixB	1	b0042	ECK120001516	43188	44129	forward			Protein FixB	313	predicted electron transfer flavoprotein, NAD/FAD-binding domain and ETFP adenine nucleotide-binding domain-like	P31574
fixC	1	b0043	ECK120001517	44180	45466	forward			Protein FixC	428	flavoprotein (electron transport), possibly involved in anaerobic carnitine metabolism	P68644
fixX	1	b0044	ECK120001518	45463	45750	forward			Ferredoxin-like protein FixX	95	putative ferredoxin possibly involved in anaerobic carnitine metabolism	P68646
yaaU	1	b0045	ECK120001519	45807	47138	forward			Putative metabolite transport protein YaaU	443	putative transport protein YaaU, major facilitator superfamily (MFS)	P31679
kefF	1	b0046	ECK120001520	47246	47776	forward			Glutathione-regulated potassium-efflux system ancillary protein KefF (Quinone oxidoreductase KefF) (EC 1.6.5.2)	176	regulator of KefC-mediated potassium transport and quinone oxidoreductase	P0A754
kefC	1	b0047	ECK120000514	47769	49631	forward			Glutathione-regulated potassium-efflux system protein KefC (K(+)/H(+) antiporter)	620	K<sup>+</sup> : H<sup>+</sup> antiporter KefC	P03819
folA	1	b0048	ECK120000320	49823	50302	forward			Dihydrofolate reductase (EC 1.5.1.3)	159	dihydrofolate reductase	P0ABQ4
apaH	1	b0049	ECK120000044	50380	51222	reverse			Bis(5'-nucleosyl)-tetraphosphatase [symmetrical] (EC 3.6.1.41) (Ap4A hydrolase) (Diadenosine 5',5'''-P1,P4-tetraphosphate pyrophosphohydrolase) (Diadenosine tetraphosphatase)	280	diadenosine tetraphosphatase	P05637
apaG	1	b0050	ECK120000043	51229	51606	reverse			Protein ApaG	125	hypothetical protein	P62672
rsmA	1	b0051	ECK120000516	51609	52430	reverse			Ribosomal RNA small subunit methyltransferase A (EC 2.1.1.182) (16S rRNA (adenine(1518)-N(6)/adenine(1519)-N(6))-dimethyltransferase) (16S rRNA dimethyladenosine transferase) (16S rRNA dimethylase) (High level kasugamycin resistance protein KsgA) (Kasugamycin dimethyltransferase) (S-adenosylmethionine-6-N', N'-adenosyl(rRNA) dimethyltransferase)	273	16S rRNA m<sup>6</sup><sub>2</sub>A1518,m<sup>6</sup><sub>2</sub>A1519 dimethyltransferase	P06992
pdxA	1	b0052	ECK120000684	52427	53416	reverse			4-hydroxythreonine-4-phosphate dehydrogenase (EC 1.1.1.262) (4-(phosphohydroxy)-L-threonine dehydrogenase)	329	4-hydroxy-L-threonine phosphate dehydrogenase, NAD-dependent	P19624
surA	1	b0053	ECK120000974	53416	54702	reverse			Chaperone SurA (Peptidyl-prolyl cis-trans isomerase SurA) (PPIase SurA) (EC 5.2.1.8) (Rotamase SurA) (Survival protein A)	428	peptidyl-prolyl <i>cis-trans</i> isomerase (PPIase)	P0ABZ6	yes
lptD	1	b0054	ECK120002332	54755	57109	reverse			LPS-assembly protein LptD (Organic solvent tolerance protein)	784	outer membrane lipopolysaccharide transport and assembly complex - LptD subunit	P31554
djlA	1	b0055	ECK120002333	57364	58179	forward			Co-chaperone protein DjlA (DnaJ-like protein DjlA)	271	chaperone with DnaK	P31680
yabP	9	b4659	ECK120001522	58474	59124	forward			Putative uncharacterized protein YabP	216	putative protein	P39220
yabQ	11	b4659	ECK120002110	59121	59279	forward			Uncharacterized protein YabQ	52	putative protein	P39221
rluA	1	b0058	ECK120002331	59687	60346	reverse			Ribosomal large subunit pseudouridine synthase A (EC 5.4.99.28) (EC 5.4.99.29) (23S rRNA pseudouridine(746) synthase) (rRNA pseudouridylate synthase A) (rRNA-uridine isomerase A) (tRNA pseudouridine(32) synthase)	219	23S rRNA pseudouridine<sup>746</sup> and tRNA pseudouridine<sup>32</sup> synthase	P0AA37
rapA	1	b0059	ECK120001071	60358	63264	reverse			RNA polymerase-associated protein RapA (EC 3.6.4.-) (ATP-dependent helicase HepA)	968	RNA polymerase-binding ATPase and RNAP recycling factor	P60240
polB	1	b0060	ECK120000738	63429	65780	reverse			DNA polymerase II (Pol II) (EC 2.7.7.7)	783	DNA polymerase II	P21189
araD	1	b0061	ECK120000051	65855	66550	reverse			L-ribulose-5-phosphate 4-epimerase AraD (EC 5.1.3.4) (Phosphoribulose isomerase)	231	L-ribulose 5-phosphate 4-epimerase	P08203
araA	1	b0062	ECK120000048	66835	68337	reverse			L-arabinose isomerase (EC 5.3.1.4)	500	L-arabinose isomerase	P08202
araB	1	b0063	ECK120000049	68348	70048	reverse			Ribulokinase (EC 2.7.1.16)	566	L-ribulokinase	P08204
araC	1	b0064	ECK120000050	70387	71265	forward			Arabinose operon regulatory protein	292	AraC DNA-binding transcriptional dual regulator	P0A9E0
yabI	1	b0065	ECK120001523	71351	72115	forward			Inner membrane protein YabI	254	conserved inner membrane protein	P30149
thiQ	1	b0066	ECK120001524	72229	72927	reverse			Thiamine import ATP-binding protein ThiQ (EC 3.6.3.-)	232	thiamin ABC transporter - ATP binding subunit	P31548
thiP	1	b0067	ECK120001526	72911	74521	reverse			Thiamine transport system permease protein ThiP	536	thiamin ABC transporter - membrane subunit	P31549
tbpA	1	b0068	ECK120002667	74497	75480	reverse			Thiamine-binding periplasmic protein	327	thiamin ABC transporter - periplasmic binding protein	P31550
sgrR	1	b0069	ECK120033551	75644	77299	reverse			HTH-type transcriptional regulator SgrR	551	SgrR DNA-binding transcriptional dual regulator	P33595
sgrT	9	b4662	ECK120016307	77388	77519	forward			Putative inhibitor of glucose uptake transporter SgrT	43	SgrT, regulator of PtsG activity	C1P5Z7
setA	1	b0070	ECK120001692	77621	78799	forward			Sugar efflux transporter A	392	sugar / lactose exporter SetA	P31675
leuD	1	b0071	ECK120001527	78848	79453	reverse			3-isopropylmalate dehydratase small subunit (EC 4.2.1.33) (Alpha-IPM isomerase) (IPMI) (Isopropylmalate isomerase)	201	LeuD	P30126
leuC	1	b0072	ECK120001528	79464	80864	reverse			3-isopropylmalate dehydratase large subunit (EC 4.2.1.33) (Alpha-IPM isomerase) (IPMI) (Isopropylmalate isomerase)	466	LeuC	P0A6A6
leuB	1	b0073	ECK120001529	80867	81958	reverse			3-isopropylmalate dehydrogenase (EC 1.1.1.85) (3-IPM-DH) (Beta-IPM dehydrogenase) (IMDH)	363	3-isopropylmalate dehydrogenase	P30125
leuA	1	b0074	ECK120001204	81958	83529	reverse			2-isopropylmalate synthase (EC 2.3.3.13) (Alpha-IPM synthase) (Alpha-isopropylmalate synthase)	523	2-isopropylmalate synthase	P09151
leuL	9	b0075	ECK120001253	83622	83708	reverse			leu operon leader peptide (leu operon attenuator peptide)	28	leu operon leader peptide	P0AD79
leuO	1	b0076	ECK120000524	84368	85312	forward			HTH-type transcriptional regulator LeuO	314	LeuO DNA-binding transcriptional dual regulator	P10151
ilvI	1	b0077	ECK120000492	85630	87354	forward			Acetolactate synthase isozyme 3 large subunit (EC 2.2.1.6) (AHAS-III) (ALS-III) (Acetohydroxy-acid synthase III large subunit)	574	acetolactate synthase / acetohydroxybutanoate synthase, catalytic subunit	P00893
ilvH	1	b0078	ECK120001247	87357	87848	forward			Acetolactate synthase isozyme 3 small subunit (EC 2.2.1.6) (ALS-III) (Acetohydroxy-acid synthase III small subunit) (AHAS-III)	163	acetolactate synthase / acetohydroxybutanoate synthase, regulatory subunit	P00894
fruL	9		ECK120000080	87860	87946	forward			Putative fruR/shl operon leader peptide	28		P0ADF0
cra	1	b0080	ECK120000332	88028	89032	forward			Catabolite repressor/activator (Fructose repressor)	334	Cra DNA-binding transcriptional dual regulator	P0ACP1
mraZ	1	b0081	ECK120001072	89634	90092	forward			Transcriptional regulator MraZ	152	MraZ DNA-binding transcriptional repressor	P22186
rsmH	1	b0082	ECK120001073	90094	91035	forward			Ribosomal RNA small subunit methyltransferase H (EC 2.1.1.199) (16S rRNA m(4)C1402 methyltransferase) (rRNA (cytosine-N(4)-)-methyltransferase RsmH)	313	16S rRNA m<sup>4</sup>C1402 methyltransferase	P60390
ftsL	1	b0083	ECK120001074	91032	91397	forward			Cell division protein FtsL	121	essential cell division protein FtsL	P0AEN4
ftsI	1	b0084	ECK120000335	91413	93179	forward			Peptidoglycan D,D-transpeptidase FtsI (EC 3.4.16.4) (Essential cell division protein FtsI) (Murein transpeptidase) (Penicillin-binding protein 3) (PBP-3) (Peptidoglycan synthase FtsI)	588	essential cell division protein FtsI; penicillin-binding protein 3	P0AD68
murE	1	b0085	ECK120000614	93166	94653	forward			UDP-N-acetylmuramoyl-L-alanyl-D-glutamate--2,6-diaminopimelate ligase (EC 6.3.2.13) (Meso-A2pm-adding enzyme) (Meso-diaminopimelate-adding enzyme) (UDP-MurNAc-L-Ala-D-Glu:meso-diaminopimelate ligase) (UDP-MurNAc-tripeptide synthetase) (UDP-N-acetylmuramyl-tripeptide synthetase)	495	UDP-<i>N</i>-acetylmuramoylalanyl-D-glutamate 2,6-diaminopimelate ligase	P22188
murF	1	b0086	ECK120000615	94650	96008	forward			UDP-N-acetylmuramoyl-tripeptide--D-alanyl-D-alanine ligase (EC 6.3.2.10) (D-alanyl-D-alanine-adding enzyme) (UDP-MurNAc-pentapeptide synthetase)	452	D-alanyl-D-alanine-adding enzyme	P11880
mraY	1	b0087	ECK120000597	96002	97084	forward			Phospho-N-acetylmuramoyl-pentapeptide-transferase (EC 2.7.8.13) (UDP-MurNAc-pentapeptide phosphotransferase)	360	phospho-N-acetylmuramoyl-pentapeptide transferase	P0A6W3
murD	1	b0088	ECK120000613	97087	98403	forward			UDP-N-acetylmuramoylalanine--D-glutamate ligase (EC 6.3.2.9) (D-glutamic acid-adding enzyme) (UDP-N-acetylmuramoyl-L-alanyl-D-glutamate synthetase)	438	UDP-<i>N</i>-acetylmuramoyl-L-alanine:D-glutamate ligase	P14900
ftsW	1	b0089	ECK120000338	98403	99647	forward			Probable peptidoglycan glycosyltransferase FtsW (PGT) (EC 2.4.1.129) (Cell division protein FtsW) (Cell wall polymerase) (Lipid II flippase FtsW) (Peptidoglycan polymerase) (PG polymerase)	414	essential cell division protein FtsW; lipid II flippase	P0ABG4
murG	1	b0090	ECK120000616	99644	100711	forward			UDP-N-acetylglucosamine--N-acetylmuramyl-(pentapeptide) pyrophosphoryl-undecaprenol N-acetylglucosamine transferase (EC 2.4.1.227) (Undecaprenyl-PP-MurNAc-pentapeptide-UDPGlcNAc GlcNAc transferase)	355	N-acetylglucosaminyl transferase	P17443
murC	1	b0091	ECK120000612	100765	102240	forward			UDP-N-acetylmuramate--L-alanine ligase (EC 6.3.2.8) (UDP-N-acetylmuramoyl-L-alanine synthetase)	491	UDP-<i>N</i>-acetylmuramate-alanine ligase	P17952
ddlB	1	b0092	ECK120000208	102233	103153	forward			D-alanine--D-alanine ligase B (EC 6.3.2.4) (D-Ala-D-Ala ligase B) (D-alanylalanine synthetase B)	306	D-alanine-D-alanine ligase B	P07862
ftsQ	1	b0093	ECK120000336	103155	103985	forward			Cell division protein FtsQ	276	essential cell division protein FtsQ	P06136
ftsA	1	b0094	ECK120000333	103982	105244	forward			Cell division protein FtsA	420	essential cell division protein FtsA	P0ABH0
ftsZ	1	b0095	ECK120000341	105305	106456	forward			Cell division protein FtsZ	383	essential cell division protein FtsZ	P0A9A6
lpxC	1	b0096	ECK120000259	106557	107474	forward			UDP-3-O-acyl-N-acetylglucosamine deacetylase (UDP-3-O-acyl-GlcNAc deacetylase) (EC 3.5.1.108) (Protein EnvA) (UDP-3-O-[R-3-hydroxymyristoyl]-N-acetylglucosamine deacetylase)	305	UDP-3-O-acyl-N-acetylglucosamine deacetylase	P0A725
secM	1	b0097	ECK120001075	107705	108217	forward			Secretion monitor	170	secretion monitor that regulates SecA translation (General Secretory Pathway)	P62395
secA	1	b0098	ECK120000925	108279	110984	forward			Protein translocase subunit SecA	901	protein translocation ATPase	P10408
mutT	1	b0099	ECK120000619	111044	111433	forward			8-oxo-dGTP diphosphatase (8-oxo-dGTPase) (EC 3.6.1.55) (7,8-dihydro-8-oxoguanine-triphosphatase) (Mutator protein MutT) (dGTP pyrophosphohydrolase)	129	8-oxo-dGTP diphosphatase	P08337
yacG	2	b0101	ECK120002191	111649	111846	reverse			DNA gyrase inhibitor YacG	65	DNA gyrase inhibitor YacG	P0A8H8
zapD	1	b0102	ECK120002190	111856	112599	reverse			Cell division protein ZapD (Z ring-associated protein D)	247	cell division factor ZapD	P36680
coaE	1	b0103	ECK120002189	112599	113219	reverse			Dephospho-CoA kinase (EC 2.7.1.24) (Dephosphocoenzyme A kinase)	206	dephospho-CoA kinase	P0A6I9
guaC	1	b0104	ECK120000415	113444	114487	forward			GMP reductase (EC 1.7.1.7) (Guanosine 5'-monophosphate oxidoreductase) (Guanosine monophosphate reductase)	347	GMP reductase	P60560
hofC	1	b0106	ECK120001732	114522	115724	reverse			Protein transport protein HofC homolog	400	inner membrane protein HofC	P36646
hofB	1	b0107	ECK120002011	115714	117099	reverse			Protein transport protein HofB homolog	461	T2SSE family protein	P36645
ppdD	1	b0108	ECK120002012	117109	117549	reverse			Prepilin peptidase-dependent protein D	146	prepilin peptidase dependent protein	P36647
nadC	1	b0109	ECK120001500	117752	118645	reverse			Nicotinate-nucleotide pyrophosphorylase [carboxylating] (EC 2.4.2.19) (Quinolinate phosphoribosyltransferase [decarboxylating]) (QAPRTase)	297	quinolinate phosphoribosyltransferase (decarboxylating)	P30011
ampD	1	b0110	ECK120000037	118733	119284	forward			1,6-anhydro-N-acetylmuramyl-L-alanine amidase AmpD (EC 3.5.1.28) (N-acetylmuramoyl-L-alanine amidase)	183	<i>N</i>-acetyl-anhydromuramyl-L-alanine amidase	P13016
ampE	2	b0111	ECK120000038	119281	120135	forward			Protein AmpE	284	inner membrane protein	P0AE14
aroP	1	b0112	ECK120001076	120178	121551	reverse			Aromatic amino acid transport protein AroP (General aromatic amino acid permease)	457	aromatic amino acid:H<sup>+</sup> symporter AroP	P15993
pdhR	1	b0113	ECK120002605	122092	122856	forward			Pyruvate dehydrogenase complex repressor	254	PdhR DNA-binding transcriptional dual regulator	P0ACL9
aceE	1	b0114	ECK120000021	123017	125680	forward			Pyruvate dehydrogenase E1 component (PDH E1 component) (EC 1.2.4.1)	887	subunit of E1p component of pyruvate dehydrogenase complex	P0AFG8
aceF	1	b0115	ECK120000022	125695	127587	forward			Dihydrolipoyllysine-residue acetyltransferase component of pyruvate dehydrogenase complex (EC 2.3.1.12) (Dihydrolipoamide acetyltransferase component of pyruvate dehydrogenase complex) (E2)	630	pyruvate dehydrogenase, E2 subunit	P06959
lpd	1	b0116	ECK120000536	127912	129336	forward			Dihydrolipoyl dehydrogenase (EC 1.8.1.4) (Dihydrolipoamide dehydrogenase) (E3 component of pyruvate and 2-oxoglutarate dehydrogenases complexes) (Glycine cleavage system L protein)	474	lipoamide dehydrogenase	P0A9P0
yacH	1	b0117	ECK120002192	129407	131260	reverse			Uncharacterized protein YacH	617	putative membrane protein	P36682
acnB	1	b0118	ECK120002193	131615	134212	forward			Aconitate hydratase B (ACN) (Aconitase) (EC 4.2.1.3) ((2R,3S)-2-methylisocitrate dehydratase) ((2S,3R)-3-hydroxybutane-1,2,3-tricarboxylate dehydratase) (2-methyl-cis-aconitate hydratase) (EC 4.2.1.99) (Iron-responsive protein-like) (IRP-like) (RNA-binding protein)	865	bifunctional aconitate hydratase 2 and 2-methylisocitrate dehydratase	P36683
yacL	1	b0119	ECK120002328	134388	134750	forward			UPF0231 protein YacL	120	conserved protein	P0A8E5
speD	1	b0120	ECK120000951	134788	135582	reverse			S-adenosylmethionine decarboxylase proenzyme (AdoMetDC) (SAMDC) (EC 4.1.1.50) [Cleaved into: S-adenosylmethionine decarboxylase beta chain; S-adenosylmethionine decarboxylase alpha chain]	264	adenosylmethionine decarboxylase, proenzyme	P0A7F6
speE	1	b0121	ECK120000952	135598	136464	reverse			Polyamine aminopropyltransferase (Cadaverine aminopropyltransferase) (EC 2.5.1.-) (Putrescine aminopropyltransferase) (PAPT) (Spermidine aminopropyltransferase) (EC 2.5.1.79) (Spermidine synthase) (SPDS) (SPDSY) (EC 2.5.1.16) (Spermine synthase) (EC 2.5.1.22) (Thermospermine synthase)	288	spermidine synthase	P09158
yacC	1	b0122	ECK120001077	136570	136917	reverse			Uncharacterized protein YacC	115	putative protein	P0AA95
cueO	1	b0123	ECK120002194	137083	138633	forward			Blue copper oxidase CueO (Copper efflux oxidase)	516	cuprous oxidase / multicopper oxidase with role in copper homeostasis	P36649
gcd	1	b0124	ECK120000362	138835	141225	reverse			Quinoprotein glucose dehydrogenase (EC 1.1.5.2) (Glucose dehydrogenase [pyrroloquinoline-quinone])	796	quinoprotein glucose dehydrogenase	P15877
hpt	1	b0125	ECK120002443	141431	141967	forward			Hypoxanthine phosphoribosyltransferase (HPRT) (EC 2.4.2.8)	178	hypoxanthine-guanine phosphoribosyltransferase	P0A9M2
can	1	b0126	ECK120002195	142008	142670	reverse			Carbonic anhydrase 2 (EC 4.2.1.1) (Carbonate dehydratase 2)	220	carbonic anhydrase 2	P61517
yadG	1	b0127	ECK120002196	142779	143705	forward			Uncharacterized ABC transporter ATP-binding protein YadG	308	putative transport protein, ABC superfamily - ATP-binding component	P36879
yadH	1	b0128	ECK120002197	143702	144472	forward			Inner membrane transport permease YadH	256	putative transport protein, ABC superfamily - membrane component	P0AFN6
yadI	1	b0129	ECK120002198	144577	145017	forward			Putative phosphotransferase enzyme IIA component YadI (Putative PTS system EIIA component)	146	predicted PTS enzyme IIA	P36881
yadE	1	b0130	ECK120001687	145081	146310	forward			Uncharacterized protein YadE	409	predicted polysaccharide deacetylase lipoprotein	P31666
panD	1	b0131	ECK120001685	146314	146694	reverse			Aspartate 1-decarboxylase (EC 4.1.1.11) (Aspartate alpha-decarboxylase) [Cleaved into: Aspartate 1-decarboxylase beta chain; Aspartate 1-decarboxylase alpha chain]	126	PanD proenzyme, &pi; protein	P0A790
yadD	1	b0132	ECK120001686	146968	147870	forward			Recombination-promoting nuclease RpnC (EC 3.1.21.-)	300	predicted transposase	P31665
panC	1	b0133	ECK120001684	147944	148795	reverse			Pantothenate synthetase (PS) (EC 6.3.2.1) (Pantoate--beta-alanine ligase) (Pantoate-activating enzyme)	283	pantothenate synthetase	P31663
panB	1	b0134	ECK120001618	148807	149601	reverse			3-methyl-2-oxobutanoate hydroxymethyltransferase (EC 2.1.2.11) (Ketopantoate hydroxymethyltransferase) (KPHMT)	264	3-methyl-2-oxobutanoate hydroxymethyltransferase	P31057
yadC	9	b0135	ECK120001621	149715	150953	reverse			Uncharacterized fimbrial-like protein YadC	412	predicted fimbrial-like adhesin protein	P31058	yes
yadK	9	b0136	ECK120002200	151003	151599	reverse			Uncharacterized fimbrial-like protein YadK	198	predicted fimbrial-like adhesin protein	P37016	yes
yadL	9	b0137	ECK120002201	151626	152231	reverse			Uncharacterized fimbrial-like protein YadL	201	hypothetical protein	P37017
yadM	9	b0138	ECK120002202	152243	152812	reverse			Uncharacterized fimbrial-like protein YadM	189	predicted fimbrial-like adhesin protein	P37018	yes
htrE	1	b0139	ECK120001897	152829	155426	reverse			Outer membrane usher protein HtrE (Heat shock protein E)	865	putative outer membrane usher protein	P33129
yadV	1	b0140	ECK120001898	155461	156201	reverse			Probable fimbrial chaperone YadV	246	probable pilin chaperone similar to PapD	P33128
yadN	6	b0141	ECK120002203	156299	156883	reverse			Uncharacterized fimbrial-like protein YadN	194	predicted fimbrial-like adhesin protein	P37050	yes
folK	1	b0142	ECK120001342	157253	157732	reverse			2-amino-4-hydroxy-6-hydroxymethyldihydropteridine pyrophosphokinase (EC 2.7.6.3) (6-hydroxymethyl-7,8-dihydropterin pyrophosphokinase) (PPPK) (7,8-dihydro-6-hydroxymethylpterin-pyrophosphokinase) (HPPK)	159	6-hydroxymethyl-7,8-dihydropterin pyrophosphokinase	P26281
pcnB	1	b0143	ECK120000683	157729	159126	reverse			Poly(A) polymerase I (PAP I) (EC 2.7.7.19) (Plasmid copy number protein)	465	poly(A) polymerase I	P0ABF1
gluQ	1	b0144	ECK120001331	159186	160112	reverse			Glutamyl-Q tRNA(Asp) synthetase (Glu-Q-RSs) (EC 6.1.1.-)	308	glutamyl-Q tRNA<sup>Asp</sup> synthetase	P27305
dksA	1	b0145	ECK120000224	160149	160604	reverse			RNA polymerase-binding transcription factor DksA (DnaK suppressor protein)	151	RNA polymerase-binding transcription factor DksA	P0ABS1
sfsA	1	b0146	ECK120000938	160782	161486	reverse			Sugar fermentation stimulation protein A	234	predicted DNA-binding transcriptional regulator of maltose metabolism	P0A823
thpR	1	b0147	ECK120002205	161501	162031	reverse			RNA 2',3'-cyclic phosphodiesterase (RNA 2',3'-CPDase) (EC 3.1.4.-) (Two-histidine 2',3'-cyclic phosphodiesterase acting on RNA)	176	RNA 2',3'-cyclic phosphodiesterase	P37025
hrpB	1	b0148	ECK120002204	162105	164534	forward			ATP-dependent RNA helicase HrpB (EC 3.6.4.13)	809	putative ATP-dependent RNA helicase HrpB	P37024
mrcB	1	b0149	ECK120000598	164730	167264	forward			Penicillin-binding protein 1B (PBP-1b) (PBP1b) (Murein polymerase) [Includes: Penicillin-insensitive transglycosylase (EC 2.4.1.129) (Peptidoglycan TGase) (Peptidoglycan glycosyltransferase); Penicillin-sensitive transpeptidase (EC 3.4.16.4) (DD-transpeptidase)]	844	peptidoglycan glycosyltransferase / peptidoglycan D,D-transpeptidase - MrcB	P02919
fhuA	1	b0150	ECK120000296	167484	169727	forward			Ferrichrome outer membrane transporter/phage receptor (Ferric hydroxamate receptor) (Ferric hydroxamate uptake) (Ferrichrome-iron receptor)	747	ferrichrome / phage / antibiotic outer membrane porin FhuA	P06971
fhuC	1	b0151	ECK120000298	169778	170575	forward			Iron(3+)-hydroxamate import ATP-binding protein FhuC (EC 3.6.3.34) (Ferric hydroxamate uptake protein C) (Ferrichrome transport ATP-binding protein FhuC) (Iron(III)-hydroxamate import ATP-binding protein FhuC)	265	iron(III) hydroxamate ABC transporter - ATP binding subunit	P07821
fhuD	1	b0152	ECK120000299	170575	171465	forward			Iron(3+)-hydroxamate-binding protein FhuD (Ferric hydroxamate uptake protein D) (Ferrichrome-binding periplasmic protein) (Iron(III)-hydroxamate-binding protein FhuD)	296	iron(III) hydroxamate ABC transporter - periplasmic binding protein	P07822
fhuB	1	b0153	ECK120000297	171462	173444	forward			Iron(3+)-hydroxamate import system permease protein FhuB (Ferric hydroxamate uptake protein B) (Ferrichrome transport system permease protein FhuB) (Ferrichrome uptake protein FhuB) (Iron(III)-hydroxamate import system permease protein FhuB)	660	iron(III) hydroxamate ABC transporter - membrane subunit	P06972
hemL	1	b0154	ECK120000425	173602	174882	reverse			Glutamate-1-semialdehyde 2,1-aminomutase (GSA) (EC 5.4.3.8) (Glutamate-1-semialdehyde aminotransferase) (GSA-AT)	426	glutamate-1-semialdehyde aminotransferase	P23893
clcA	1	b0155	ECK120002206	175107	176528	forward			H(+)/Cl(-) exchange transporter ClcA (ClC-ec1)	473	chloride:H<sup>+</sup> antiporter ClcA	P37019
erpA	1	b0156	ECK120002207	176610	176954	forward			Iron-sulfur cluster insertion protein ErpA	114	essential respiratory protein A	P0ACC3
yadS	1	b0157	ECK120002208	177001	177624	reverse			UPF0126 inner membrane protein YadS	207	conserved inner membrane protein	P0AFP0
btuF	1	b0158	ECK120002209	177662	178462	reverse			Vitamin B12-binding protein	266	vitamin B<sub>12</sub> ABC transporter - periplasmic binding protein	P37028
mtn	1	b0159	ECK120001078	178455	179153	reverse			5'-methylthioadenosine/S-adenosylhomocysteine nucleosidase (MTA/SAH nucleosidase) (MTAN) (EC 3.2.2.9) (5'-methylthioadenosine nucleosidase) (MTA nucleosidase) (P46) (S-adenosylhomocysteine nucleosidase) (AdoHcy nucleosidase) (SAH nucleosidase) (SRH nucleosidase)	232	5'-methylthioadenosine/S-adenosylhomocysteine nucleosidase	P0AF12
dgt	1	b0160	ECK120000219	179237	180754	forward			Deoxyguanosinetriphosphate triphosphohydrolase (dGTP triphosphohydrolase) (dGTPase) (EC 3.1.5.1)	505	dGTP triphosphohydrolase	P15723
degP	1	b0161	ECK120000456	180884	182308	forward			Periplasmic serine endoprotease DegP (EC 3.4.21.107) (Heat shock protein DegP) (Protease Do)	474	serine protease Do	P0C0V0
cdaR	1	b0162	ECK120002210	182463	183620	forward			Carbohydrate diacid regulator (Sugar diacid regulator)	385	CdaR DNA-binding transcriptional activator	P37047
yaeH	2	b0163	ECK120002211	183709	184095	reverse			UPF0325 protein YaeH	128	conserved protein	P62768
yaeI	1	b0164	ECK120002212	184257	185069	reverse			Phosphodiesterase YaeI (EC 3.1.4.-)	270	phosphodiesterase	P37049
dapD	1	b0166	ECK120000201	185123	185947	reverse			2,3,4,5-tetrahydropyridine-2,6-dicarboxylate N-succinyltransferase (EC 2.3.1.117) (Tetrahydrodipicolinate N-succinyltransferase) (THDP succinyltransferase) (THP succinyltransferase) (Tetrahydropicolinate succinylase)	274	tetrahydrodipicolinate succinylase	P0A9D8
glnD	1	b0167	ECK120000563	185978	188650	reverse			Bifunctional uridylyltransferase/uridylyl-removing enzyme (UTase/UR) (Bifunctional [protein-PII] modification enzyme) (Bifunctional nitrogen sensor protein) [Includes: [Protein-PII] uridylyltransferase (PII uridylyltransferase) (UTase) (EC 2.7.7.59); [Protein-PII]-UMP uridylyl-removing enzyme (UR) (EC 3.1.4.-)]	890	PII uridylyltransferase / uridylyl removing enzyme	P27249
map	1	b0168	ECK120002606	188712	189506	reverse			Methionine aminopeptidase (MAP) (MetAP) (EC 3.4.11.18) (Peptidase M)	264	methionine aminopeptidase	P0AE18
rpsB	1	b0169	ECK120000892	189874	190599	forward			30S ribosomal protein S2 (Small ribosomal subunit protein uS2)	241	30S ribosomal subunit protein S2	P0A7V0
tsf	1	b0170	ECK120001022	190857	191708	forward			Elongation factor Ts (EF-Ts) (Bacteriophage Q beta RNA-directed RNA polymerase subunit IV)	283	protein chain elongation factor EF-Ts	P0A6P1
pyrH	1	b0171	ECK120001493	191855	192580	forward			Uridylate kinase (UK) (EC 2.7.4.22) (Uridine monophosphate kinase) (UMP kinase) (UMPK)	241	UMP kinase	P0A7E9
frr	1	b0172	ECK120000329	192872	193429	forward			Ribosome-recycling factor (RRF) (Ribosome-releasing factor)	185	ribosome recycling factor	P0A805
dxr	1	b0173	ECK120002371	193521	194717	forward			1-deoxy-D-xylulose 5-phosphate reductoisomerase (DXP reductoisomerase) (EC 1.1.1.267) (1-deoxyxylulose-5-phosphate reductoisomerase) (2-C-methyl-D-erythritol 4-phosphate synthase)	398	1-deoxy-D-xylulose 5-phosphate reductoisomerase	P45568
ispU	1	b0174	ECK120002712	194903	195664	forward			Ditrans,polycis-undecaprenyl-diphosphate synthase ((2E,6E)-farnesyl-diphosphate specific) (EC 2.5.1.31) (Ditrans,polycis-undecaprenylcistransferase) (Undecaprenyl diphosphate synthase) (UDS) (Undecaprenyl pyrophosphate synthase) (UPP synthase)	253	undecaprenyl diphosphate synthase	P60472
cdsA	1	b0175	ECK120000135	195677	196534	forward			Phosphatidate cytidylyltransferase (EC 2.7.7.41) (CDP-DAG synthase) (CDP-DG synthase) (CDP-diacylglycerol synthase) (CDS) (CDP-diglyceride pyrophosphorylase) (CDP-diglyceride synthase) (CTP:phosphatidate cytidylyltransferase)	285	CDP-diglyceride synthetase	P0ABG1
rseP	1	b0176	ECK120002290	196546	197898	forward			Regulator of sigma-E protease RseP (EC 3.4.24.-) (S2P endopeptidase) (Site-2 protease RseP) (S2P protease RseP) (Site-2-type intramembrane protease)	450	intramembrane zinc metalloprotease, signal peptide peptidase	P0AEH1
bamA	1	b0177	ECK120002713	197928	200360	forward			Outer membrane protein assembly factor BamA (Omp85)	810	Outer Membrane Protein Assembly Complex - BamA subunit	P0A940
skp	1	b0178	ECK120000448	200482	200967	forward			Chaperone protein Skp (DNA-binding 17 kDa protein) (Histone-like protein HLP-1) (Seventeen kilodalton protein)	161	periplasmic chaperone	P0AEU7
lpxD	1	b0179	ECK120000310	200971	201996	forward			UDP-3-O-(3-hydroxymyristoyl)glucosamine N-acyltransferase (UDP-3-O-(3-OHC14)-GlcN N-acyltransferase) (EC 2.3.1.191) (Protein FirA) (Rifampicin resistance protein) (UDP-3-O-(3-hydroxytetradecanoyl)glucosamine N-acyltransferase)	341	UDP-3-O-(R-3-hydroxymyristoyl)-glucosamine <i>N</i>-acyltransferase	P21645
fabZ	1	b0180	ECK120001257	202101	202556	forward			3-hydroxyacyl-[acyl-carrier-protein] dehydratase FabZ (EC 4.2.1.59) ((3R)-hydroxymyristoyl-[acyl-carrier-protein] dehydratase) ((3R)-hydroxymyristoyl-ACP dehydrase) (17 kDa actomyosin component) (Beta-hydroxyacyl-ACP dehydratase)	151	3-hydroxy-acyl-[acyl-carrier-protein] dehydratase	P0A6Q6
lpxA	1	b0181	ECK120000538	202560	203348	forward			Acyl-[acyl-carrier-protein]--UDP-N-acetylglucosamine O-acyltransferase (UDP-N-acetylglucosamine acyltransferase) (EC 2.3.1.129)	262	UDP-N-acetylglucosamine acyltransferase	P0A722
lpxB	1	b0182	ECK120000539	203348	204496	forward			Lipid-A-disaccharide synthase (EC 2.4.1.182)	382	lipid A disaccharide synthase	P10441
rnhB	1	b0183	ECK120000852	204493	205089	forward			Ribonuclease HII (RNase HII) (EC 3.1.26.4)	198	RNAse HII, degrades RNA of DNA-RNA hybrids	P10442
dnaE	1	b0184	ECK120000232	205126	208608	forward			DNA polymerase III subunit alpha (EC 2.7.7.7)	1160	DNA polymerase III, &alpha; subunit	P10443
accA	1	b0185	ECK120001591	208621	209580	forward			Acetyl-coenzyme A carboxylase carboxyl transferase subunit alpha (ACCase subunit alpha) (Acetyl-CoA carboxylase carboxyltransferase subunit alpha) (EC 6.4.1.2)	319	acetyl-CoA carboxyltransferase, &alpha; subunit	P0ABD5
ldcC	1	b0186	ECK120002714	209679	211820	forward			Constitutive lysine decarboxylase (LDC) (EC 4.1.1.18)	713	lysine decarboxylase 2	P52095
yaeR	1	b0187	ECK120002715	211877	212266	forward			Uncharacterized protein YaeR	129	predicted lyase	P52096
tilS	1	b0188	ECK120002717	212331	213629	forward			tRNA(Ile)-lysidine synthase (EC 6.3.4.19) (tRNA(Ile)-2-lysyl-cytidine synthase) (tRNA(Ile)-lysidine synthetase)	432	tRNA<sup>Ile</sup>-lysidine synthetase	P52097
rof	1	b0189	ECK120002691	213678	213932	reverse			Protein rof	84	modulator of Rho-dependent transcription termination	P0AFW8
yaeP	5	b4406	ECK120001539	213925	214125	reverse			UPF0253 protein YaeP	66	conserved protein	P0A8K5
yaeQ	1	b0190	ECK120002718	214291	214836	forward			Uncharacterized protein YaeQ	181	conserved protein	P0AA97
arfB	1	b0191	ECK120002223	214833	215255	forward			Peptidyl-tRNA hydrolase ArfB (PTH) (EC 3.1.1.29) (Alternative ribosome-rescue factor B)	140	peptidyl-tRNA hydrolase, ribosome rescue factor	P40711
nlpE	1	b0192	ECK120002038	215269	215979	forward			Lipoprotein NlpE (Copper homeostasis protein CutF)	236	outer membrane lipoprotein NlpE, involved in surface sensing	P40710
yaeF	1	b0193	ECK120002039	216179	217003	reverse			Probable lipoprotein peptidase YaeF (EC 3.4.-.-) (Uncharacterized lipoprotein YaeF)	274	predicted lipoprotein	P37056
proS	1	b0194	ECK120000761	217057	218775	reverse			Proline--tRNA ligase (EC 6.1.1.15) (Global RNA synthesis factor) (Prolyl-tRNA synthetase) (ProRS)	572	proline-tRNA ligase	P16659
trmO	1	b0195	ECK120001459	218887	219594	reverse			tRNA (adenine(37)-N6)-methyltransferase (EC 2.1.1.-) (tRNA (m6t6A37) methyltransferase) (tRNA methyltransferase O)	235	tRNA m<sup>6</sup>t<sup>6</sup>A37 methyltransferase	P28634
rcsF	1	b0196	ECK120001458	219591	219995	reverse			Outer membrane lipoprotein RcsF	134	RcsF outer membrane lipoprotein - activates the Rcs pathway during envelope stress	P69411
metQ	1	b0197	ECK120001460	220113	220928	reverse			D-methionine-binding lipoprotein MetQ	271	L-methionine / D-methionine ABC transporter - membrane anchored binding protein	P28635
metI	1	b0198	ECK120001676	220968	221621	reverse			D-methionine transport system permease protein MetI	217	L-methionine / D-methionine ABC transporter - membrane subunit	P31547
metN	1	b0199	ECK120001569	221614	222645	reverse			Methionine import ATP-binding protein MetN (EC 3.6.3.-)	343	L-methionine / D-methionine ABC transporter - ATP binding subunit	P30750
gmhB	1	b0200	ECK120001675	222833	223408	forward			D-glycero-beta-D-manno-heptose-1,7-bisphosphate 7-phosphatase (EC 3.1.3.82) (D,D-heptose 1,7-bisphosphate phosphatase) (HBP phosphatase)	191	D,D-heptose 1,7-bisphosphate phosphatase	P63228
dkgB	1	b0207	ECK120001592	229167	229970	forward			2,5-diketo-D-gluconic acid reductase B (2,5-DKG reductase B) (2,5-DKGR B) (25DKGR-B) (EC 1.1.1.346) (AKR5D)	267	methylglyoxal reductase/4-nitrobenzaldehyde reductase/2,5-diketo-D-gluconate reductase	P30863
yafC	1	b0208	ECK120001593	229967	230881	reverse			Uncharacterized HTH-type transcriptional regulator YafC	304	putative LysR family transcriptional regulator	P30864
yafD	1	b0209	ECK120001594	231122	231922	forward			UPF0294 protein YafD	266	conserved protein	P0A8U2
yafE	1	b0210	ECK120001595	231926	232549	forward			Uncharacterized protein YafE	207	predicted S-adenosylmethionine-dependent methyltransferase	P30866
mltD	1	b0211	ECK120000240	232597	233955	reverse			Membrane-bound lytic murein transglycosylase D (EC 4.2.2.n1) (Murein hydrolase D) (Regulatory protein DniR)	452	membrane-bound lytic murein transglycosylase D	P0AEZ7
gloB	1	b0212	ECK120002719	234027	234782	reverse			Hydroxyacylglutathione hydrolase GloB (EC 3.1.2.6) (Glyoxalase II) (Glx II)	251	glyoxalase II	P0AC84
yafS	1	b0213	ECK120002720	234816	235538	forward			Uncharacterized protein YafS	240	predicted S-adenosyl-L-methionine-dependent methyltransferase	P75672
rnhA	1	b0214	ECK120000851	235535	236002	reverse			Ribonuclease HI (RNase HI) (EC 3.1.26.4) (Ribonuclease H) (RNase H)	155	RNase HI, degrades RNA of DNA-RNA hybrids, participates in DNA replication	P0A7Y4
dnaQ	1	b0215	ECK120000237	236067	236798	forward			DNA polymerase III subunit epsilon (EC 2.7.7.7)	243	DNA polymerase III, &epsilon; subunit	P03007
yafT	5	b0217	ECK120002722	237335	238120	forward			Uncharacterized lipoprotein YafT	261	predicted aminopeptidase	P77339
ykfM	9	b4586	ECK120002909	238257	238736	reverse			Uncharacterized protein YkfM	159	hypothetical protein	A5A605
yafU	9	b0218	ECK120016283	238746	239084	reverse			Putative inner membrane protein YafU	112	predicted inner membrane protein	P77354
yafF	3		ECK120002731	239190	239378	forward			Putative uncharacterized protein YafF	62	conserved protein	Q2EEP9
yafV	1	b0219	ECK120002723	239419	240189	reverse			Omega-amidase YafV (EC 3.5.1.3)	256	predicted C-N hydrolase family amidase, NAD(P)-binding	Q47679
ivy	2	b0220	ECK120002724	240343	240816	forward			Inhibitor of vertebrate lysozyme	157	periplasmic chaperone, inhibitor of vertebrate C-type lysozyme	P0AD59
fadE	1	b0221	ECK120002725	240859	243303	reverse			Acyl-coenzyme A dehydrogenase (ACDH) (Acyl-CoA dehydrogenase) (EC 1.3.8.7) (EC 1.3.8.8)	814	acyl-CoA dehydrogenase/acyl-CoA dehydrogenase/acyl-CoA dehydrogenase/acyl-CoA dehydrogenase/acyl-CoA dehydrogenase/acyl-CoA dehydrogenase/acyl-CoA dehydrogenase/acyl-CoA dehydrogenase	Q47146
lpcA	1	b0222	ECK120002726	243543	244121	forward			Phosphoheptose isomerase (EC 5.3.1.28) (Sedoheptulose 7-phosphate isomerase)	192	D-sedoheptulose 7-phosphate isomerase	P63224
yafJ	1	b0223	ECK120002727	244327	245094	forward			Putative glutamine amidotransferase YafJ (EC 2.4.2.-)	255	predicted amidotransferase	Q47147
yafK	1	b0224	ECK120002728	245065	245805	reverse			Putative L,D-transpeptidase YafK (EC 2.-.-.-)	246	conserved protein	P0AA99
yafQ	2	b0225	ECK120002729	245961	246239	reverse			mRNA interferase toxin YafQ (EC 3.1.-.-) (Endoribonuclease YafQ) (Toxin YafQ)	92	toxin of the YafQ-DinJ toxin-antitoxin system	Q47149	yes
dinJ	1	b0226	ECK120002730	246242	246502	reverse			Antitoxin DinJ	86	DinJ antitoxin of YafQ-DinJ toxin-antitoxin system / DNA-binding transcriptional repressor	Q47150	yes
yafL	1	b0227	ECK120002733	246712	247461	forward			Probable endopeptidase YafL (EC 3.4.-.-) (Uncharacterized lipoprotein YafL)	249	predicted lipoprotein and C40 family peptidase	Q47151
rayT	2	b0228	ECK120002734	247637	248134	forward			REP-associated tyrosine transposase	165	REP-associated tyrosine transposase	Q47152
lfhA	1		ECK120002732	248358	250070	reverse		BioCyc: Pseudo gene - promoter-less fragment	Putative truncated flagellar export/assembly protein LfhA	570	flagellar system protein, promoterless fragment	Q47153
lafU	1		ECK120002737	250072	250827	forward		BioCyc: Pseudo gene - promoter-less fragment	Putative truncated flagellar export/assembly protein LafU	251	flagellar system protein, promoterless fragment	Q47154
dinB	1	b0231	ECK120002735	250898	251953	forward			DNA polymerase IV (Pol IV) (EC 2.7.7.7) (Translesion synthesis polymerase IV) (TSL polymerase IV)	351	DNA polymerase IV (Y-family DNA polymerase; translesion DNA synthesis)	Q47155
yafN	5	b0232	ECK120002736	252005	252298	forward			Antitoxin YafN	97	antitoxin of the YafO-YafN toxin-antitoxin system	Q47156
yafO	7	b0233	ECK120002739	252301	252699	forward			mRNA interferase toxin YafO (EC 3.1.-.-) (Endoribonuclease YafO) (Toxin YafO)	132	ribosome-dependent mRNA interferase, toxin of the YafO-YafN toxin-antitoxin system	Q47157
yafP	1	b0234	ECK120001452	252709	253161	forward			Uncharacterized N-acetyltransferase YafP (EC 2.3.1.-)	150	predicted acyltransferase with acyl-CoA N-acyltransferase domain	Q47158
ykfJ	1		ECK120002738	253467	253733	forward			Putative uncharacterized protein YkfJ	88	conserved protein	P75675
prfH	1		ECK120002745	253702	254202	forward			Putative peptide chain release factor homolog (RF-H)	166	predicted peptide chain release factor	P28369
pepD	1	b0237	ECK120000687	254259	255716	reverse			Cytosol non-specific dipeptidase (EC 3.4.13.18) (Aminoacyl-histidine dipeptidase) (Beta-alanyl-histidine dipeptidase) (Carnosinase) (Cysteinylglycinase) (Peptidase D) (Xaa-His dipeptidase) (X-His dipeptidase)	485	peptidase D	P15288
gpt	1	b0238	ECK120000407	255977	256435	forward			Xanthine phosphoribosyltransferase (EC 2.4.2.22) (Xanthine-guanine phosphoribosyltransferase) (XGPRT)	152	xanthine-guanine phsophoribosyltransferase	P0A9M5
frsA	1	b0239	ECK125229290	256527	257771	forward			Esterase FrsA (EC 3.1.-.-)	414	fermentation/respiration switch protein	P04335
crl	1	b0240	ECK125229291	257829	259006	forward		Biocyc: Pseudogene due to an IS1 insertion in the gene in K12	Sigma factor-binding protein Crl (Curlin genes transcriptional activatory protein)	391.667	RNA polymerase holoenzyme assembly factor Crl	P24251
insB9	Not in Uniprot	b4710	ECK120001313	257923	258426	reverse				167	IS1 transposase B
insA9	Not in Uniprot	b4709	ECK120001079	258345	258620	reverse				91	IS1 repressor TnpA
phoE	1	b0241	ECK120000720	259045	260100	reverse			Outer membrane pore protein E	351	outer membrane porin E	P02932
proB	1	b0242	ECK120000759	260388	261491	forward			Glutamate 5-kinase (EC 2.7.2.11) (Gamma-glutamyl kinase) (GK)	367	glutamate 5-kinase	P0A7B5
proA	1	b0243	ECK120000758	261503	262756	forward			Gamma-glutamyl phosphate reductase (GPR) (EC 1.2.1.41) (Glutamate-5-semialdehyde dehydrogenase) (Glutamyl-gamma-semialdehyde dehydrogenase) (GSA dehydrogenase)	417	glutamate-5-semialdehyde dehydrogenase	P07004
ykfI	9	b0245	ECK120002741	263328	263669	reverse			Toxin YkfI	113	CP4-6 prophage; toxin of the YkfI-YafW toxin-antitoxin system	P77692		CP4-6
yafW	7	b0246	ECK120016284	263690	264007	reverse			Antitoxin YafW	105	antitoxin of the YkfI-YafW toxin-antitoxin pair	Q47684		CP4-6
ykfH	6	b4504	ECK120002759	264026	264247	reverse			Uncharacterized protein YkfH	73	putative protein	Q9XB42		(CP4-6)
ykfG	1	b0247	ECK120002742	264256	264732	reverse			UPF0758 protein YkfG	158	CP4-6 prophage; predicted DNA repair protein	Q47685		CP4-6
yafX	1	b0248	ECK120002743	264748	265206	reverse			Uncharacterized protein YafX	152	CP4-6 prophage; predicted protein	P75676		CP4-6
ykfF	2	b0249	ECK120002744	265304	265543	reverse			UPF0401 protein YkfF	79	CP4-6 prophage; predicted protein	P75677		CP4-6
ykfB	2	b0250	ECK120033231	265620	266087	reverse			Uncharacterized protein YkfB	155	CP4-6 prophage; predicted protein	P77162		CP4-6
yafY	9	b0251	ECK120033232	266110	266553	reverse			Lipoprotein YafY	147	CP4-6 prophage; inner membrane lipoprotein	P77365		CP4-6
yafZ	1	b0252	ECK120002747	267184	268005	reverse			UPF0380 protein YafZ	273	CP4-6 prophage; conserved protein	P77206		CP4-6
ykfA	1	b0253	ECK120002748	268097	268960	reverse			Uncharacterized protein YkfA	287	CP4-6 prophage; predicted GTP-binding protein	P75678		CP4-6
perR	1	b0254	ECK120002749	269289	270182	reverse			HTH-type transcriptional regulator PerR (Peroxide resistance protein PerR)	297	PerR transcriptional regulator	Q57083		CP4-6
insN-1	1	b0255	ECK120002750	270242	270646	forward			Putative transposase InsN for insertion sequence element IS911A	134	CP4-6 prophage; partial regulator of insertion element IS911A	P75679		(CP4-6)
insI-1	1	b0256	ECK120002752	270603	271754	forward			Transposase InsI for insertion sequence element IS30A	383	transposase of IS30	P0CF88		(CP4-6)
insO-1	1	b0257	ECK125135291	271830	272255	forward			Putative transposase InsO for insertion sequence element IS911A	141	CP4-6 prophage; partial transposase of insertion element IS911A, interrupted by insertion of IS30 element	P75680		(CP4-6)
ykfC	1	b0258	ECK120002753	272847	273992	forward			Putative uncharacterized protein YkfC	381	CP4-6 prophage; conserved protein	Q47688		CP4-6
insH-1	1	b0259	ECK120002754	274101	275117	reverse			Transposase InsH for insertion sequence element IS5A	338	CP4-6 prophage; IS5 transposase and trans-activator	P0CE49		(CP4-6)
mmuP	1	b0260	ECK120002755	275325	276728	forward			Probable S-methylmethionine permease	467	<i>S</i>-methyl-L-methionine transporter	Q47689		CP4-6
mmuM	1	b0261	ECK120002756	276715	277647	forward			Homocysteine S-methyltransferase (EC 2.1.1.10) (S-methylmethionine:homocysteine methyltransferase)	310	homocysteine <i>S</i>-methyltransferase	Q47690		CP4-6
afuC	1	b0262	ECK120002757	277756	278802	reverse			Fe(3+) ions import ATP-binding protein FbpC (EC 3.6.3.30)	348	CP4-6 prophage; predicted ferric transporter subunit/ATP-binding component of ABC superfamily	P37009		CP4-6
afuB	1	b0263	ECK120023913	278814	279176	reverse			Putative ferric transport system permease-like protein AfuB	120	AfuB pseudogene; CP4-6 prophage; non-functioning membrane subunit of ferric ion ABC transporter	P75681		CP4-6
insB-2	1	b0264	ECK125240991	279178	279681	reverse			Insertion element IS1 2 protein InsB (IS1b)	167	IS1 protein InsB	P0CF26		(CP4-6)
insA-2	1	b0265	ECK120016285	279600	279875	reverse			Insertion element IS1 2 protein InsA (IS1b)	91	IS1 protein InsA	P0CF08		(CP4-6)
insX	1	b4505	ECK120002785	280024	280362	reverse			Putative transposase YkgN	112	predicted IS protein	Q79E92		(CP4-6)
yagB	7	b0266	ECK120002214	280385	280735	reverse			Putative uncharacterized protein YagB	116	CP4-6 prophage; conserved protein	P37008		CP4-6
yagA	1	b0267	ECK120002213	280829	281983	reverse			Uncharacterized protein YagA	384	CP4-6 prophage; predicted DNA-binding transcriptional regulator	P37007		CP4-6
yagE	1	b0268	ECK120002760	282278	283186	forward			Putative 2-dehydro-3-deoxy-D-gluconate aldolase YagE (KDG aldolase YagE) (EC 4.1.2.51) (Putative 2-dehydro-3-deoxy-D-pentonate aldolase YagE) (EC 4.1.2.28)	302	CP4-6 prophage; probable 2-keto-3-deoxygluconate aldolase	P75682		CP4-6
yagF	1	b0269	ECK120002761	283201	285168	forward			D-xylonate dehydratase YagF (EC 4.2.1.82)	655	CP4-6 prophage; D-xylonate dehydratase	P77596		CP4-6
yagG	1	b0270	ECK120002762	285395	286777	forward			Putative glycoside/cation symporter YagG	460	putative transport protein, glycoside-pentoside-hexuronide (GPH):cation symporter family	P75683		CP4-6
yagH	1	b0271	ECK120002763	286789	288399	forward			Putative beta-xylosidase (EC 3.2.1.37) (1,4-beta-D-xylan xylohydrolase) (Xylan 1,4-beta-xylosidase)	536	CP4-6 prophage; predicted xylosidase/arabinosidase	P77713		CP4-6
yagI	1	b0272	ECK125240987	288404	289162	reverse			Uncharacterized HTH-type transcriptional regulator YagI	252	CP4-6 prophage; predicted DNA-binding transcriptional regulator	P77300	yes	CP4-6
argF	1	b0273	ECK120023914	289301	290305	reverse			Ornithine carbamoyltransferase subunit F (OTCase-2) (EC 2.1.3.3)	334	ornithine carbamoyltransferase chain F	P06960		CP4-6
insB-3	1	b0274	ECK120002765	290649	291152	reverse			Insertion element IS1 3 protein InsB (IS1c)	167		P0CF27		(CP4-6)
insA-3	1	b0275	ECK120002766	291071	291346	reverse			Insertion element IS1 3 protein InsA (IS1c)	91	IS1 protein InsA	P0CF09		(CP4-6)
yagJ	2	b0276	ECK120002767	291500	292231	forward			Putative uncharacterized protein YagJ	243	CP4-6 prophage; predicted protein	P77169		CP4-6
yagK	1	b0277	ECK120002768	292322	292948	reverse			Uncharacterized protein YagK	208	CP4-6 prophage; conserved protein	P77657		CP4-6
yagL	5	b0278	ECK120002769	293220	293918	reverse			Uncharacterized protein YagL	232	CP4-6 prophage; DNA-binding protein	P77607		CP4-6
yagM	9	b0279	ECK120002770	293945	294799	reverse			Uncharacterized protein YagM	284	CP4-6 prophage; predicted protein	P71296		CP4-6
yagN	9	b0280	ECK125146691	295139	295579	reverse			Uncharacterized protein YagN	146	CP4-6 prophage; predicted protein	P71297		CP4-6
intF	1	b0281	ECK120002773	295696	297096	reverse			Prophage integrase IntF (Putative prophage CP4-6 integrase)	466	CP4-6 prophage; predicted phage integrase	P71298		CP4-6
yagP	1	b4695	ECK120000436	297381	297791	reverse			Uncharacterized protein YagP	136	predicted transcriptional regulator LYSR-type	P75684
paoD	1	b0283	ECK120002774	297770	298726	reverse			Uncharacterized protein YagQ	318	molybdenum cofactor insertion chaperone for PaoABC	P77183
paoC	1	b0284	ECK120002775	298736	300934	reverse			Putative xanthine dehydrogenase YagR molybdenum-binding subunit (EC 1.17.1.4)	732	aldehyde dehydrogenase: molybdenum cofactor-binding subunit	P77489
paoB	1	b0285	ECK120002776	300931	301887	reverse			Putative xanthine dehydrogenase YagS FAD-binding subunit (EC 1.17.1.4)	318	aldehyde dehydrogenase, FAD-binding subunit	P77324
paoA	1	b0286	ECK120002777	301884	302573	reverse			Putative xanthine dehydrogenase YagT iron-sulfur-binding subunit	229	aldehyde dehydrogenase, Fe-S subunit	P77165
yagU	2	b0287	ECK120002778	302991	303605	forward			Inner membrane protein YagU	204	inner membrane protein that contributes to acid resistance	P0AAA1
ykgJ	1	b0288	ECK120002779	303853	304182	reverse			Uncharacterized protein YkgJ	109	predicted ferredoxin	P0AAL9
ecpE	1	b0289	ECK120002780	304495	305205	reverse			Probable fimbrial chaperone EcpE	236	<i>E. coli</i> common pilus chaperone - cryptic	P77263
ecpD	1	b0290	ECK120002781	305174	306817	reverse			Fimbria adhesin EcpD	547	polymerized tip adhesin of <i>E. coli</i> common pilus - cryptic	P77694
ecpC	1	b0291	ECK120002782	306807	309332	reverse			Probable outer membrane usher protein EcpC	841	outer membrane protein associated with <i>E. coli</i> common pilus formation - cryptic	P77802
ecpB	1	b0292	ECK120002783	309358	310026	reverse			Probable fimbrial chaperone EcpB	222	<i>E. coli</i> common pilus chaperone - cryptic	P77188
ecpA	1	b0293	ECK120002784	310084	310671	reverse			Common pilus major fimbrillin subunit EcpA (MatB fimbrillin)	195	<i>E. coli</i> common pilus - major subunit; cryptic	P0AAA3
ecpR	1	b0294	ECK120002786	310746	311336	reverse			HTH-type transcriptional regulator EcpR	196	MatA DNA-binding transcriptional dual regulator	P71301
ykgL	10	b0295	ECK120002787	312112	312339	forward			Uncharacterized protein YkgL	75	putative protein	P56257
ykgO	1	b4506	ECK120002913	312374	312514	reverse			50S ribosomal protein L36 2 (Large ribosomal subunit protein bL36-B)	46	predicted ribosomal protein	Q2EEQ2
ykgM	1	b0296	ECK120002057	312514	312777	reverse			50S ribosomal protein L31 type B (Large ribosomal subunit protein bL31-B)	87	predicted ribosomal protein	P0A7N1
ykgR	10	b4671	ECK120003257	313141	313242	reverse			Uncharacterized membrane protein YkgR	33	small membrane protein	C1P5Z8
eaeH	1	b0297	ECK120023906	314357	315244	forward			Putative attaching and effacing protein homolog	295	attaching and effacing protein homolog, pathogenesis factor	P36943
insE-1	2	b0298	ECK120002788	315291	315590	forward		BioCyc: start site 315291 instead of 315282	Transposase InsE for insertion sequence IS3A	99	IS3 element protein InsE	P0CF66
insF-1	1	b0299	ECK120002790	315587	316453	forward			Transposase InsF for insertion sequence IS3A	288	IS3 element protein InsF	P0CF79
ykgA	1	b0300	ECK125095416	316450	317136	reverse		Uniprot: "The sequence BAE76085 differs from that shown. Reason: Erroneous initiation."	Putative HTH-type transcriptional regulator YkgA	228	predicted DNA-binding transcriptional regulator	P77601
rclC	1	b0301	ECK120002791	317726	318319	reverse			Inner membrane protein RclC (Reactive chlorine resistance protein C)	197	conserved inner membrane protein, hypochlorite stress response	P75685
rclB	9	b0303	ECK120002792	318331	318567	reverse			Uncharacterized protein RclB (Reactive chlorine resistance protein B)	78	predicted protein, hypochlorite stress response	P75687
rclA	1	b0304	ECK120002793	318676	320001	reverse			Probable pyridine nucleotide-disulfide oxidoreductase RclA (Reactive chlorine resistance protein A)	441	predicted oxidoreductase with FAD/NAD(P)-binding domain and dimerization domain; hypochlorite stress response	P77212
rclR	1	b0305	ECK120002794	320227	321081	forward			RCS-specific HTH-type transcriptional activator RclR (Reactive chlorine resistance protein R)	284	RclR DNA-binding transcriptional activator	P77379
ykgE	1	b0306	ECK120002795	321608	322327	forward			Uncharacterized protein YkgE	239	predicted oxidoreductase	P77252
ykgF	1	b0307	ECK120002796	322338	323765	forward			Uncharacterized electron transport protein YkgF	475	predicted amino acid dehydrogenase with NAD(P)-binding domain and ferridoxin-like domain	P77536
ykgG	1	b0308	ECK120002797	323758	324453	forward			Uncharacterized protein YkgG	231	putative protein	P77433
b0309	9	b0309	ECK120002798	324408	324620	reverse			Putative uncharacterized protein b0309	70		P75688
ykgH	9	b0310	ECK120002799	324696	325364	reverse			Uncharacterized protein YkgH	222	predicted inner membrane protein	P77180
betA	1	b0311	ECK120000105	325577	327247	reverse			Oxygen-dependent choline dehydrogenase (CDH) (CHD) (EC 1.1.99.1) (Betaine aldehyde dehydrogenase) (BADH) (EC 1.2.1.8)	556	choline dehydrogenase	P17444
betB	1	b0312	ECK120000106	327261	328733	reverse			NAD/NADP-dependent betaine aldehyde dehydrogenase (BADH) (EC 1.2.1.8)	490	betaine aldehyde dehydrogenase	P17445
betI	1	b0313	ECK120000107	328747	329334	reverse			HTH-type transcriptional regulator BetI	195	BetI DNA-binding transcriptional repressor	P17446
betT	1	b0314	ECK120000108	329463	331496	forward			High-affinity choline transport protein	677	choline:H<sup>+</sup> symporter	P0ABC9
pdeL	1	b0315	ECK120001214	332371	333459	forward			Cyclic di-GMP phosphodiesterase PdeL (EC 3.1.4.52)	362	DNA-binding transcriptional activator / phosphodiesterase, c-di-GMP-specific	P21514
yahB	1	b0316	ECK120002800	333501	334433	reverse			Uncharacterized HTH-type transcriptional regulator YahB	310	predicted DNA-binding transcriptional regulator, LysR-type	P77700
yahC	5	b0317	ECK120002801	334525	335022	reverse			Uncharacterized protein YahC	165	predicted inner membrane protein	P77219
yahD	1	b0318	ECK120002802	335280	335885	forward			Putative ankyrin repeat protein YahD	201	predicted transcriptional regulator with ankyrin domain	P77736
yahE	5	b0319	ECK120002803	335925	336788	forward			Uncharacterized protein YahE	287	putative protein	P77297
yahF	1	b0320	ECK120002804	336778	338325	forward			Uncharacterized protein YahF	515	predicted acyl-CoA synthetase with NAD(P)-binding domain and succinyl-CoA synthetase domain	P77187
yahG	1	b0321	ECK120002805	338325	339743	forward			Uncharacterized protein YahG	472	conserved protein	P77221
yahH	9	b0322	ECK120026444	339793	340089	forward		Uniprot: "The sequence BAE76105 differs from that shown. Reason: Erroneous initiation"	Putative uncharacterized protein YahH	98	putative protein	Q2EEQ3
yahI	1	b0323	ECK120002806	340165	341115	forward			Carbamate kinase-like protein YahI	316	predicted carbamate kinase-like protein	P77624
yahJ	1	b0324	ECK120002807	341125	342507	forward			Uncharacterized protein YahJ	460	predicted deaminase with metallo-dependent hydrolase domain	P77554
yahK	1	b0325	ECK120002808	342884	343933	forward			Aldehyde reductase YahK (EC 1.1.1.2) (Zinc-dependent alcohol dehydrogenase YahK)	349	aldehyde reductase, NADPH-dependent	P75691
yahL	9	b0326	ECK120002809	344176	344991	forward			Uncharacterized protein YahL	271	putative protein	P77393
yahM	9	b0327	ECK120002810	345404	345649	forward			Uncharacterized protein YahM	81	putative protein	P75692
yahN	1	b0328	ECK120002811	345666	346337	reverse			Uncharacterized membrane protein YahN	223	putative transporter, resistance to homoserine/threonine (RhtB) family	P75693
yahO	1	b0329	ECK120002812	346484	346759	forward			Uncharacterized protein YahO	91	putative protein	P75694
prpR	1	b0330	ECK120002813	346857	348443	reverse			Propionate catabolism operon regulatory protein	528	PrpR DNA-binding transcriptional dual regulator	P77743
prpB	1	b0331	ECK120002814	348682	349572	forward			2-methylisocitrate lyase (2-MIC) (MICL) (EC 4.1.3.30) ((2R,3S)-2-methylisocitrate lyase)	296	2-methylisocitrate lyase	P77541
prpC	1	b0333	ECK120002815	350012	351181	forward			2-methylcitrate synthase (2-MCS) (MCS) (EC 2.3.3.5) ((2S,3S)-2-methylcitrate synthase) (Citrate synthase) (EC 2.3.3.16)	389	2-methylcitrate synthase	P31660
prpD	1	b0334	ECK120002816	351215	352666	forward			2-methylcitrate dehydratase (2-MC dehydratase) (EC 4.2.1.79) ((2S,3S)-2-methylcitrate dehydratase) (Aconitate hydratase) (ACN) (Aconitase) (EC 4.2.1.3)	483	2-methylcitrate dehydratase	P77243
prpE	1	b0335	ECK120002817	352706	354592	forward			Propionate--CoA ligase (EC 6.2.1.17) (Propionyl-CoA synthetase)	628	propionyl-CoA synthetase	P77495
codB	1	b0336	ECK120001298	354922	356181	forward			Cytosine permease	419	cytosine transporter	P0AA82
codA	1	b0337	ECK120001297	356171	357454	forward			Cytosine deaminase (CD) (CDA) (CDase) (EC 3.5.4.1) (Cytosine aminohydrolase) (Isoguanine deaminase) (EC 3.5.4.-)	427	cytosine deaminase	P25524
cynR	1	b0338	ECK120001385	357791	358690	reverse			HTH-type transcriptional regulator CynR (Cyn operon transcriptional activator)	299	CynR DNA-binding transcriptional dual regulator	P27111
cynT	1	b0339	ECK120000171	358799	359458	forward			Carbonic anhydrase 1 (EC 4.2.1.1) (Carbonate dehydratase 1)	219	carbonic anhydrase 1	P0ABE9
cynS	1	b0340	ECK120000170	359489	359959	forward			Cyanate hydratase (Cyanase) (EC 4.2.1.104) (Cyanate hydrolase) (Cyanate lyase)	156	cyanase	P00816
cynX	1	b0341	ECK120000172	359992	361146	forward			Cyanate transport protein CynX	384	cyanate transporter	P17583
lacA	1	b0342	ECK120000517	361249	361860	reverse			Galactoside O-acetyltransferase (GAT) (EC 2.3.1.18) (Thiogalactoside acetyltransferase)	203	galactoside O-acetyltransferase	P07464
lacY	1	b0343	ECK120000519	361926	363179	reverse			Lactose permease (Lactose-proton symport)	417	lactose / melibiose:H<sup>+</sup> symporter LacY	P02920
lacZ	1	b0344	ECK120000520	363231	366305	reverse			Beta-galactosidase (Beta-gal) (EC 3.2.1.23) (Lactase)	1024	&beta;-galactosidase	P00722
lacI	1	b0345	ECK120000518	366428	367510	reverse			Lactose operon repressor	360	LacI DNA-binding transcriptional repressor	P03023
mhpR	1	b0346	ECK120002818	367587	368420	reverse			DNA-binding transcriptional activator MhpR (mhp operon transcriptional activator)	277	MhpR transcriptional activator	P77569
mhpA	1	b0347	ECK120004469	368611	370275	forward			3-(3-hydroxy-phenyl)propionate/3-hydroxycinnamic acid hydroxylase (3-HCI hydroxylase) (3-HPP hydroxylase) (EC 1.14.13.127)	554	3-(3-hydroxyphenyl)propionate 2-hydroxylase	P77397
mhpB	1	b0348	ECK120004470	370277	371221	forward			2,3-dihydroxyphenylpropionate/2,3-dihydroxicinnamic acid 1,2-dioxygenase (EC 1.13.11.16) (3-carboxyethylcatechol 2,3-dioxygenase)	314	2,3-dihydroxyphenylpropionate 1,2-dioxygenase	P0ABR9
mhpC	1	b0349	ECK120004471	371239	372105	forward			2-hydroxy-6-oxononadienedioate/2-hydroxy-6-oxononatrienedioate hydrolase (EC 3.7.1.14) (2-hydroxy-6-ketonona-2,4-diene-1,9-dioic acid 5,6-hydrolase) (2-hydroxy-6-oxonona-2,4,7-triene-1,9-dioic acid 5,6-hydrolase) (2-hydroxy-6-oxonona-2,4-diene-1,9-dioic acid 5,6-hydrolase)	288	2-hydroxy-6-ketonona-2,4-dienedioate hydrolase	P77044
mhpD	1	b0350	ECK120004472	372115	372924	forward			2-keto-4-pentenoate hydratase (EC 4.2.1.80) (2-hydroxypentadienoic acid hydratase)	269	2-hydroxypentadienoate hydratase	P77608
mhpF	1	b0351	ECK120004473	372921	373871	forward			Acetaldehyde dehydrogenase (EC 1.2.1.10) (Acetaldehyde dehydrogenase [acetylating])	316	acetaldehyde dehydrogenase (acylating)	P77580
mhpE	1	b0352	ECK120002819	373868	374881	forward			4-hydroxy-2-oxovalerate aldolase (HOA) (EC 4.1.3.39) (4-hydroxy-2-keto-pentanoic acid aldolase) (4-hydroxy-2-oxopentanoate aldolase)	337	4-hydroxy-2-ketovalerate aldolase	P51020
mhpT	1	b0353	ECK120002820	375459	376670	forward			3-(3-hydroxy-phenyl)propionate transporter (3HPP transporter) (3-(3-hydroxy-phenyl)propionate:H(+) symporter) (3HPP:H(+) symporter)	403	3-hydroxyphenylpropionate / 3-hydroxycinnamate:H<sup>+</sup> symporter	P77589
yaiL	1	b0354	ECK120002821	376772	377311	forward			Uncharacterized protein YaiL	179	nucleoprotein/polynucleotide-associated enzyme	P51024
frmB	1	b0355	ECK120002822	377535	378368	reverse			S-formylglutathione hydrolase FrmB (FGH) (EC 3.1.2.12)	277	<i>S</i>-formylglutathione hydrolase	P51025
frmA	1	b0356	ECK120002569	378462	379571	reverse			S-(hydroxymethyl)glutathione dehydrogenase (EC 1.1.1.284) (Alcohol dehydrogenase class-3) (EC 1.1.1.1) (Alcohol dehydrogenase class-III) (Glutathione-dependent formaldehyde dehydrogenase) (FALDH) (FDH) (GSH-FDH) (EC 1.1.1.-)	369	formaldehyde dehydrogenase	P25437
frmR	1	b0357	ECK120002823	379606	379881	reverse			Transcriptional repressor FrmR	91	regulator protein	P0AAP3
yaiO	7	b0358	ECK120002825	380069	380842	reverse			Outer membrane protein YaiO	257	outer membrane protein	Q47534
yaiX	1	b0359	ECK120023917	380844	381059	reverse	Split gene (partner yaiF)	BioCyc: "YaiX: pseudogene, interrupted by IS2A; hexapeptide transferase superfamily" (so 230 aa is full-length uninterrupted protein)	Putative uncharacterized acetyltransferase YaiX (EC 2.3.1.-)	71	predicted acyl transferase (pseudogene)	P75697
insC-1	1	b0360	ECK120002826	381351	381716	forward		BioCyc: gene start is 381351 and not 381306	Transposase InsC for insertion element IS2A	121	IS2 element protein InsA	P0CF40
insD-1	1	b0361	ECK120002827	381674	382579	forward			Transposase InsD for insertion element IS2A	301	IS2 element protein	P0CF53
yaiF	Split gene	b0362	ECK120002828	382504	382890	reverse	Split gene (partner yaiX)	BioCyc: YaiF is annotated as YaiX and is the N-terminal part of YaiX (that is interrupted by InsCD		128	putative protein
yaiP	1	b0363	ECK120002829	382739	383935	reverse			Uncharacterized glycosyltransferase YaiP (EC 2.4.-.-)	398	predicted glucosyltransferase	Q47536
yaiS	1	b0364	ECK120002830	384059	384616	reverse			Uncharacterized deacetylase YaiS (EC 3.-.-.-)	185	conserved protein	P71311
tauA	1	b0365	ECK120002831	385232	386194	forward			Taurine-binding periplasmic protein (Sulfate starvation-induced protein 1) (SSI1)	320	taurine ABC transporter - periplasmic binding protein	Q47537
tauB	1	b0366	ECK120002832	386207	386974	forward			Taurine import ATP-binding protein TauB (EC 3.6.3.36)	255	taurine ABC transporter - ATP binding subunit	Q47538
tauC	1	b0367	ECK120002833	386971	387798	forward			Taurine transport system permease protein TauC	275	taurine ABC transporter - membrane subunit	Q47539
tauD	1	b0368	ECK120000421	387795	388646	forward			Alpha-ketoglutarate-dependent taurine dioxygenase (EC 1.14.11.17) (2-aminoethanesulfonate dioxygenase) (Sulfate starvation-induced protein 3) (SSI3)	283	taurine dioxygenase	P37610
hemB	1	b0369	ECK120002835	388753	389727	reverse			Delta-aminolevulinic acid dehydratase (ALAD) (ALADH) (EC 4.2.1.24) (Porphobilinogen synthase)	324	porphobilinogen synthase	P0ACB2
yaiT	1	b0371	ECK120023908	390251	391711	forward	Split gene (partner yaiU)	EcoGene: " Pseudogene reconstruction, autotransporter family; interrupted by IS3B" Full length uninterrupted protein is 968 bp	Putative uncharacterized protein YaiT	486	putative protein	P77199
insF-2	1	b0372	ECK120002836	391739	392605	reverse			Transposase InsF for insertion sequence IS3B	288		P0CF80
insE-2	2	b0373	ECK120002837	392602	392910	reverse			Transposase InsE for insertion sequence IS3B	102	IS3 element protein InsE	P0CF67
yaiU	Split gene	b0374	ECK120002838	393015	394418	forward	Split gene (partner yaiT)	Actually this is the C-terminal part of YaiT and not a separate gene.		467	putative protein
yaiV	1	b0375	ECK120002839	394506	395129	forward			Inhibitor of hydrogen peroxide resistance	207	predicted DNA-binding transcriptional regulator	P0AAP5
ampH	1	b0376	ECK120002410	395130	396287	reverse			D-alanyl-D-alanine-carboxypeptidase/endopeptidase AmpH (EC 3.4.-.-) (DD-alanine-endopeptidase) (DD-carboxypeptidase) (Penicillin-binding protein AmpH)	385	DD-endopeptidase/DD-carboxypeptidase	P0AD70
sbmA	1	b0377	ECK120000917	396639	397859	forward			Peptide antibiotic transporter SbmA	406	peptide antibiotic / peptide nucleic acid transporter	P0AFY6
yaiW	1	b0378	ECK120002840	397872	398966	forward			Uncharacterized protein YaiW	364	surface exposed outer membrane lipoprotein	P77562
yaiY	5	b0379	ECK120002841	399025	399333	reverse			Inner membrane protein YaiY	102	inner membrane protein	P0AAP7
yaiZ	1	b0380	ECK120002842	399593	399805	forward			Uncharacterized protein YaiZ	70	predicted inner membrane protein	P0AAQ0
ddlA	1	b0381	ECK120000207	399829	400923	reverse			D-alanine--D-alanine ligase A (EC 6.3.2.4) (D-Ala-D-Ala ligase A) (D-alanylalanine synthetase A)	364	D-alanine-D-alanine ligase A	P0A6J8
iraP	1	b0382	ECK120001231	401386	401646	forward			Anti-adapter protein IraP	86	anti-adaptor protein for &sigma;<sup>S</sup> stabilization	P0AAN9
phoA	1	b0383	ECK120000718	401747	403162	forward			Alkaline phosphatase (APase) (EC 3.1.3.1)	471	alkaline phosphatase	P00634
psiF	2	b0384	ECK120001367	403281	403601	forward			Phosphate starvation-inducible protein PsiF	106	conserved protein	P0AFM4
dgcC	1	b0385	ECK120001232	403703	404818	forward			Probable diguanylate cyclase DgcC (DGC) (EC 2.7.7.65)	371	diguanylate cyclase	P0AAP1	yes
proC	1	b0386	ECK120000760	404835	405644	reverse			Pyrroline-5-carboxylate reductase (P5C reductase) (P5CR) (EC 1.5.1.2) (PCA reductase)	269	pyrroline-5-carboxylate reductase	P0A9L8
yaiI	2	b0387	ECK120002843	405764	406222	forward			UPF0178 protein YaiI	152	conserved protein	P0A8D3
aroL	1	b0388	ECK120000078	406405	406929	forward			Shikimate kinase 2 (SK 2) (EC 2.7.1.71) (Shikimate kinase II) (SKII)	174	shikimate kinase II	P0A6E1
yaiA	2	b0389	ECK120001081	406979	407170	forward			Uncharacterized protein YaiA	63	putative protein	P0AAN5
aroM	1	b0390	ECK120000079	407428	408105	forward			Protein AroM	225	conserved protein	P0AE28
yaiE	1	b0391	ECK120002056	408177	408461	forward			Pyrimidine/purine nucleoside phosphorylase (EC 2.4.2.1) (EC 2.4.2.2) (Adenosine phosphorylase) (Cytidine phosphorylase) (Guanosine phosphorylase) (EC 2.4.2.15) (Inosine phosphorylase) (Thymidine phosphorylase) (EC 2.4.2.4) (Uridine phosphorylase) (EC 2.4.2.3) (Xanthosine phosphorylase)	94	conserved protein	P0C037
ykiA	5	b0392	ECK120002844	408609	408950	forward			Putative uncharacterized protein YkiA	113	putative protein	P75704
rdgC	1	b0393	ECK120002055	409108	410019	reverse			Recombination-associated protein RdgC	303	nucleoid-associated protein RdgC	P36767
mak	1	b0394	ECK120001261	410144	411052	forward			Fructokinase (EC 2.7.1.4) (D-fructose kinase) (Manno(fructo)kinase)	302	manno(fructo)kinase	P23917
araJ	1	b0396	ECK120000056	411297	412481	reverse			Putative transporter AraJ	394	putative transport protein, major facilitator superfamily	P23910
sbcC	1	b0397	ECK120000916	412607	415753	reverse			Nuclease SbcCD subunit C	1048	ATP dependent, structure specific DNA nuclease - SbcC subunit	P13458
sbcD	1	b0398	ECK120001082	415750	416952	reverse			Nuclease SbcCD subunit D	400	ATP dependent, structure specific DNA nuclease - SbcD subunit	P0AG76
phoB	1	b0399	ECK120000719	417142	417831	forward			Phosphate regulon transcriptional regulatory protein PhoB	229	PhoB transcriptional dual regulator	P0AFJ5
phoR	1	b0400	ECK120000724	417889	419184	forward			Phosphate regulon sensor protein PhoR (EC 2.7.13.3)	431	PhoR	P08400
brnQ	1	b0401	ECK120002064	419591	420910	forward			Branched-chain amino acid transport system 2 carrier protein (LIV-II)	439	branched chain amino acid transporter BrnQ	P0AD99
proY	1	b0402	ECK120002845	420986	422359	forward			Proline-specific permease ProY	457	proline:H+ symporter - cryptic	P0AAE2
malZ	1	b0403	ECK120000558	422518	424332	forward			Maltodextrin glucosidase (EC 3.2.1.20) (Alpha-glucosidase)	604	maltodextrin glucosidase	P21517
acpH	1	b0404	ECK120001083	424337	424918	reverse			Acyl carrier protein phosphodiesterase (ACP phosphodiesterase) (EC 3.1.4.14)	193	acyl carrier protein phosphodiesterase	P21515
queA	1	b0405	ECK120000803	425011	426081	forward			S-adenosylmethionine:tRNA ribosyltransferase-isomerase (EC 2.4.99.17) (Queuosine biosynthesis protein QueA)	356	S-adenosylmethionine:tRNA ribosyltransferase-isomerase	P0A7F9
tgt	1	b0406	ECK120000985	426137	427264	forward			Queuine tRNA-ribosyltransferase (EC 2.4.2.29) (Guanine insertion enzyme) (tRNA-guanine transglycosylase)	375	tRNA-guanine transglycosylase	P0A847
yajC	1	b0407	ECK120001084	427287	427619	forward			Sec translocon accessory complex subunit YajC	110	YajC	P0ADZ7
secD	1	b0408	ECK120000927	427647	429494	forward			Protein translocase subunit SecD (Sec translocon accessory complex subunit SecD)	615	SecD	P0AG90
secF	1	b0409	ECK120000929	429505	430476	forward			Protein translocase subunit SecF (Sec translocon accessory complex subunit SecF)	323	SecF	P0AG93
yajD	2	b0410	ECK120001085	430605	430952	forward			Putative HNH nuclease YajD (EC 3.1.-.-)	115	conserved protein	P0AAQ2
tsx	1	b0411	ECK120001024	431129	432013	reverse			Nucleoside-specific channel-forming protein Tsx	294	nucleoside channel; receptor of phage T6 and colicin K	P0A927
yajI	1	b0412	ECK120002413	432312	432851	reverse			Uncharacterized lipoprotein YajI	179	predicted lipoprotein	P46122
nrdR	1	b0413	ECK120001291	433002	433451	forward			Transcriptional repressor NrdR	149	NrdR transcriptional repressor	P0A8D0
ribD	1	b0414	ECK120001292	433455	434558	forward			Riboflavin biosynthesis protein RibD [Includes: Diaminohydroxyphosphoribosylaminopyrimidine deaminase (DRAP deaminase) (EC 3.5.4.26) (Riboflavin-specific deaminase); 5-amino-6-(5-phosphoribosylamino)uracil reductase (EC 1.1.1.193) (HTP reductase)]	367	fused diaminohydroxyphosphoribosylaminopyrimidine deaminase / 5-amino-6-(5-phosphoribosylamino)uracil reductase	P25539
ribE	1	b0415	ECK120001293	434647	435117	forward			6,7-dimethyl-8-ribityllumazine synthase (DMRL synthase) (LS) (Lumazine synthase) (EC 2.5.1.78)	156	6,7-dimethyl-8-ribityllumazine synthase	P61714
nusB	1	b0416	ECK120000659	435137	435556	forward			Transcription antitermination protein NusB (Antitermination factor NusB) (N utilization substance protein B)	139	transcription antitermination protein NusB	P0A780
thiL	1	b0417	ECK120002846	435634	436611	forward			Thiamine-monophosphate kinase (TMP kinase) (Thiamine-phosphate kinase) (EC 2.7.4.16)	325	thiamine monophosphate kinase	P0AGG0
pgpA	1	b0418	ECK120000696	436589	437107	forward			Phosphatidylglycerophosphatase A (EC 3.1.3.27) (Phosphatidylglycerolphosphate phosphatase A) (PGP phosphatase A)	172	phosphatidylglycerophosphatase A	P18200
yajO	1	b0419	ECK120002847	437161	438135	reverse			Uncharacterized oxidoreductase YajO (EC 1.-.-.-)	324	novel 1-deoxyxylulose-5-phosphate synthase	P77735
dxs	1	b0420	ECK120002848	438315	440177	reverse			1-deoxy-D-xylulose-5-phosphate synthase (EC 2.2.1.7) (1-deoxyxylulose-5-phosphate synthase) (DXP synthase) (DXPS)	620	1-deoxyxylulose-5-phosphate synthase	P77488
ispA	1	b0421	ECK120000501	440202	441101	reverse			Farnesyl diphosphate synthase (FPP synthase) (EC 2.5.1.10) ((2E,6E)-farnesyl diphosphate synthase) (Geranyltranstransferase)	299	geranyl diphosphate synthase/farnesyl diphosphate synthase	P22939
xseB	1	b0422	ECK120001086	441101	441343	reverse			Exodeoxyribonuclease 7 small subunit (EC 3.1.11.6) (Exodeoxyribonuclease VII small subunit) (Exonuclease VII small subunit)	80	exonuclease VII, small subunit	P0A8G9
thiI	1	b0423	ECK120002849	441549	442997	forward			tRNA sulfurtransferase (EC 2.8.1.4) (Sulfur carrier protein ThiS sulfurtransferase) (Thiamine biosynthesis protein ThiI) (tRNA 4-thiouridine synthase)	482	ThiI	P77718
yajL	1	b0424	ECK120002673	443051	443641	reverse			Protein/nucleic acid deglycase 3 (EC 3.1.2.-) (EC 3.5.1.-) (EC 3.5.1.124) (Chaperone protein YajL) (Maillard deglycase)	196	amino acid deglycase	Q46948
panE	1	b0425	ECK120002850	443604	444515	reverse			2-dehydropantoate 2-reductase (EC 1.1.1.169) (Ketopantoate reductase) (KPA reductase) (KPR)	303	2-dehydropantoate 2-reductase	P0A9J4
yajQ	1	b0426	ECK120002851	444683	445174	forward			UPF0234 protein YajQ	163	nucleotide binding protein	P0A8E7
yajR	1	b0427	ECK120002852	445302	446666	reverse			Inner membrane transport protein YajR	454	putative transport protein, major facilitator superfamily (MFS)	P77726
cyoE	1	b0428	ECK120000177	446815	447705	reverse			Protoheme IX farnesyltransferase (EC 2.5.1.-) (Heme B farnesyltransferase) (Heme O synthase)	296	heme O synthase	P0AEA5
cyoD	1	b0429	ECK120000176	447717	448046	reverse			Cytochrome bo(3) ubiquinol oxidase subunit 4 (Cytochrome o ubiquinol oxidase subunit 4) (Cytochrome o subunit 4) (Oxidase bo(3) subunit 4) (Ubiquinol oxidase chain D) (Ubiquinol oxidase polypeptide IV) (Ubiquinol oxidase subunit 4)	109	cytochrome <i>bo</i> terminal oxidase subunit IV	P0ABJ6
cyoC	1	b0430	ECK120000175	448046	448660	reverse			Cytochrome bo(3) ubiquinol oxidase subunit 3 (Cytochrome o ubiquinol oxidase subunit 3) (Cytochrome o subunit 3) (Oxidase bo(3) subunit 3) (Ubiquinol oxidase chain C) (Ubiquinol oxidase polypeptide III) (Ubiquinol oxidase subunit 3)	204	cytochrome <i>bo</i> terminal oxidase subunit III	P0ABJ3
cyoB	1	b0431	ECK120000174	448650	450641	reverse			Cytochrome bo(3) ubiquinol oxidase subunit 1 (EC 1.10.3.10) (Cytochrome b562-o complex subunit I) (Cytochrome o ubiquinol oxidase subunit 1) (Cytochrome o subunit 1) (Oxidase bo(3) subunit 1) (Ubiquinol oxidase chain A) (Ubiquinol oxidase polypeptide I) (Ubiquinol oxidase subunit 1)	663	cytochrome <i>bo</i> terminal oxidase subunit I	P0ABI8
cyoA	1	b0432	ECK120000173	450663	451610	reverse			Cytochrome bo(3) ubiquinol oxidase subunit 2 (Cytochrome b562-o complex subunit II) (Cytochrome o ubiquinol oxidase subunit 2) (Cytochrome o subunit 2) (Oxidase bo(3) subunit 2) (Ubiquinol oxidase chain B) (Ubiquinol oxidase polypeptide II) (Ubiquinol oxidase subunit 2)	315	cytochrome <i>bo</i> terminal oxidase subunit II	P0ABJ1
ampG	1	b0433	ECK120002076	452070	453545	reverse			Protein AmpG	491	muropeptide:H<sup>+</sup> symporter	P0AE16
yajG	1	b0434	ECK120002075	453589	454167	reverse			Uncharacterized lipoprotein YajG	192	predicted lipoprotein	P0ADA5
bolA	1	b0435	ECK120000121	454472	454789	forward			DNA-binding transcriptional regulator BolA	105	BolA DNA-binding transcriptional dual regulator	P0ABE2
tig	1	b0436	ECK120000992	455133	456431	forward			Trigger factor (TF) (EC 5.2.1.8) (PPIase)	432	chaperone protein Tig; trigger factor	P0A850
clpP	1	b0437	ECK120000155	456677	457300	forward			ATP-dependent Clp protease proteolytic subunit (EC 3.4.21.92) (Caseinolytic protease) (Endopeptidase Clp) (Heat shock protein F21.5) (Protease Ti)	207	ClpP	P0A6G7
clpX	1	b0438	ECK120002574	457426	458700	forward			ATP-dependent Clp protease ATP-binding subunit ClpX (ATP-dependent unfoldase ClpX)	424	ClpX	P0A6H1
lon	1	b0439	ECK120000535	458888	461242	forward			Lon protease (EC 3.4.21.53) (ATP-dependent protease La)	784	DNA-binding, ATP-dependent protease La	P0A9M0
hupB	1	b0440	ECK120000460	461451	461723	forward			DNA-binding protein HU-beta (HU-1) (NS1)	90	transcriptional dual regulator HU-&beta;, NS1 (HU-1)	P0ACF4
ppiD	1	b0441	ECK120002853	461915	463786	forward			Peptidyl-prolyl cis-trans isomerase D (PPIase D) (EC 5.2.1.8) (Rotamase D)	623	periplasmic folding chaperone	P0ADY1
ybaV	1	b0442	ECK120002854	463937	464308	forward			Uncharacterized protein YbaV	123	periplasmic protein associated with repression of competence	P0AAR8
fadM	1	b0443	ECK120002855	464402	464800	forward			Long-chain acyl-CoA thioesterase FadM (EC 3.1.2.-) (Acyl-CoA thioester hydrolase) (Thioesterase 3) (Thioesterase III)	132	thioesterase III	P77712
queC	1	b0444	ECK120002856	464852	465547	reverse			7-cyano-7-deazaguanine synthase (EC 6.3.4.20) (7-cyano-7-carbaguanine synthase) (PreQ(0) synthase) (Queuosine biosynthesis protein QueC)	231	7-cyano-7-deazaguanine synthase	P77756
ybaE	1	b0445	ECK120002431	465612	467312	reverse			Uncharacterized protein YbaE	566	putative transport protein, periplasmic-binding component of ABC superfamily	P46890
cof	1	b0446	ECK120002857	467412	468230	forward			HMP-PP phosphatase (EC 3.6.1.-)	272	pyridoxal phosphatase/HMP-PP hydrolase	P46891
decR	1	b0447	ECK120002858	468383	468841	forward			DNA-binding transcriptional activator DecR	152	DecR DNA-binding transcriptional activator	P0ACJ5
mdlA	1	b0448	ECK120002859	468871	470643	forward			Multidrug resistance-like ATP-binding protein MdlA (EC 3.6.3.44)	590	putative transport protein, ABC superfamily	P77265
mdlB	1	b0449	ECK120001570	470636	472417	forward			Multidrug resistance-like ATP-binding protein MdlB (EC 3.6.3.44)	593	putative transport protein, ABC superfamily	P0AAG5
glnK	1	b0450	ECK120002080	472598	472936	forward			Nitrogen regulatory protein P-II 2	112	nitrogen regulatory protein GlnK	P0AC55
amtB	1	b0451	ECK120001753	472966	474252	forward			Ammonia channel (Ammonia transporter)	428	ammonia / ammonium transporter	P69681
tesB	1	b0452	ECK120000984	474301	475161	reverse			Acyl-CoA thioesterase 2 (EC 3.1.2.-) (Acyl-CoA thioesterase II) (TEII)	286	thioesterase II	P0AGG2
ybaY	1	b0453	ECK120002860	475379	475951	forward			Uncharacterized lipoprotein YbaY	190	predicted outer membrane lipoprotein	P77717
atl	1	b0454	ECK120002861	475982	476371	reverse			DNA base-flipping protein (Alkyltransferase-like protein ATL)	129	DNA base-flipping protein	P0AFP2
ybaA	1	b0456	ECK120001087	476672	477025	forward			Uncharacterized protein YbaA	117	conserved protein	P0AAQ6
pdeB	1	b0457	ECK120002862	477067	478617	reverse			Probable cyclic di-GMP phosphodiesterase PdeB (EC 3.1.4.52)	516	predicted c-di-GMP-specific phosphodiesterase	P77473
ylaC	1	b0458	ECK120002863	478781	479251	reverse			Inner membrane protein YlaC	156	predicted inner membrane protein	P0AAS0
maa	1	b0459	ECK120002699	479367	479918	reverse			Maltose O-acetyltransferase (EC 2.3.1.79) (Maltose transacetylase)	183	maltose <i>O</i>-acetyltransferase	P77791
hha	1	b0460	ECK120000432	480090	480308	reverse			Hemolysin expression-modulating protein Hha	72	haemolysin expression modulating protein	P0ACE3
tomB	2	b0461	ECK120002285	480334	480708	reverse			Hha toxicity modulator TomB (Toxin overexpression modulator in biofilms)	124	protein that modulates Hha toxicity	P0AAR0	yes
acrB	1	b0462	ECK120001647	481254	484403	reverse			Multidrug efflux pump subunit AcrB (AcrAB-TolC multidrug efflux pump subunit AcrB) (Acridine resistance protein B)	1049	AcrAB-TolC multidrug efflux pump - permease subunit	P31224
acrA	1	b0463	ECK120001646	484426	485619	reverse			Multidrug efflux pump subunit AcrA (AcrAB-TolC multidrug efflux pump subunit AcrA) (Acridine resistance protein A)	397	AcrAB-TolC multidrug efflux pump - membrane fusion protein	P0AE06
acrR	1	b0464	ECK120002020	485761	486408	forward			HTH-type transcriptional regulator AcrR (Potential acrAB operon repressor)	215	AcrR DNA-binding transcriptional repressor	P0ACS9
mscK	1	b0465	ECK120002864	486536	489898	forward			Mechanosensitive channel MscK (Potassium efflux system KefA)	1120	potassium dependent mechanosensitive channel MscK	P77338
ybaM	5	b0466	ECK120002390	490110	490271	reverse			Uncharacterized protein YbaM	53	small protein involved in the cell envelope stress response	P45807
priC	1	b0467	ECK120000756	490285	490812	reverse			Primosomal replication protein N''	175	primosomal replication protein N''	P23862
ybaN	1	b0468	ECK120002396	490882	491259	forward			Inner membrane protein YbaN	125	conserved inner membrane protein	P0AAR5
apt	1	b0469	ECK120000047	491412	491963	forward			Adenine phosphoribosyltransferase (APRT) (EC 2.4.2.7)	183	adenine phosphoribosyltransferase	P69503
dnaX	1	b0470	ECK120000239	492092	494023	forward			DNA polymerase III subunit tau (EC 2.7.7.7) (DNA polymerase III subunit gamma)	643	DNA polymerase III, &gamma; subunit	P06710
ybaB	1	b0471	ECK120001088	494076	494405	forward			Nucleoid-associated protein YbaB	109	conserved DNA-binding protein	P0A8B5
recR	1	b0472	ECK120000825	494405	495010	forward			Recombination protein RecR	201	recombination and repair	P0A7H6
htpG	1	b0473	ECK120000029	495120	496994	forward			Chaperone protein HtpG (Heat shock protein C62.5) (Heat shock protein HtpG) (High temperature protein G)	624	molecular chaperone, HSP90 family	P0A6Z3
adk	1	b0474	ECK125203396	497175	497819	forward			Adenylate kinase (AK) (EC 2.7.4.3) (ATP-AMP transphosphorylase) (ATP:AMP phosphotransferase) (Adenylate monophosphate kinase)	214	adenylate kinase	P69441
hemH	1	b0475	ECK120000424	498055	499017	forward			Ferrochelatase (EC 4.99.1.1) (Heme synthase) (Protoheme ferro-lyase)	320	ferrochelatase	P23871
aes	1	b0476	ECK120001089	499014	499973	reverse			Acetyl esterase (EC 3.1.1.-) (EcE)	319	acetyl esterase	P23872
gsk	1	b0477	ECK120001090	500125	501429	forward			Inosine-guanosine kinase (EC 2.7.1.73)	434	inosine-guanosine kinase	P0AEW6
ybaL	1	b0478	ECK120002335	501562	503238	reverse			Putative cation/proton antiporter YbaL	558	putative transport protein, monovalent cation:proton antiporter-2 (CPA2) family	P39830
fsr	1	b0479	ECK120002865	503476	504696	reverse			Fosmidomycin resistance protein	406	fosmidomycin efflux pump	P52067
ushA	1	b0480	ECK120002303	504914	506566	forward			Protein UshA [Includes: UDP-sugar hydrolase (EC 3.6.1.45) (UDP-sugar diphosphatase) (UDP-sugar pyrophosphatase); 5'-nucleotidase (5'-NT) (EC 3.1.3.5)]	550	5'-nucleotidase / UDP-sugar hydrolase	P07024
ybaK	1	b0481	ECK120002642	506603	507082	reverse			Cys-tRNA(Pro)/Cys-tRNA(Cys) deacylase YbaK (EC 4.2.-.-)	159	Cys-tRNA<sup>Pro</sup> and Cys-tRNA<sup>Cys</sup> deacylase	P0AAR3
ybaP	1	b0482	ECK120002866	507286	508080	reverse			Uncharacterized protein YbaP	264	conserved protein	P77301
ybaQ	1	b0483	ECK120002867	508218	508559	forward			Uncharacterized HTH-type transcriptional regulator YbaQ	113	predicted DNA-binding transcriptional regulator	P0A9T6
copA	1	b0484	ECK120002868	508875	511379	reverse			Copper-exporting P-type ATPase (EC 3.6.3.54) (Copper-exporting P-type ATPase A) (Cu(+)-exporting ATPase) (Soluble copper chaperone CopA(Z))	834	Cu<sup>+</sup> export ATPase	Q59385
ybaS	1	b0485	ECK120002869	511641	512573	forward			Glutaminase 1 (EC 3.5.1.2)	310	glutaminase	P77454
ybaT	1	b0486	ECK120002870	512576	513868	forward			Inner membrane transport protein YbaT	430	putative transport protein, archaeal/bacterial transporter (ABT) family	P77400
cueR	1	b0487	ECK120002871	513993	514400	forward			HTH-type transcriptional regulator CueR (Copper efflux regulator) (Copper export regulator)	135	CueR transcriptional dual regulator	P0A9G4
ybbJ	1	b0488	ECK120002872	514401	514859	reverse			Inner membrane protein YbbJ	152	conserved inner membrane protein	P0AAS3
qmcA	1	b0489	ECK120002873	514856	515773	reverse			Protein QmcA	305	predicted protease, membrane anchored	P0AA53
fetA	1	b0490	ECK120002874	515919	516596	forward			Probable iron export ATP-binding protein FetA (EC 3.6.3.-)	225	ABC transporter with a role in iron homeostasis - ATP-binding subunit	P77279
fetB	1	b0491	ECK120002875	516583	517362	forward			Probable iron export permease protein FetB	259	ABC transporter with a role in iron homeostasis - membrane subunit	P77307
ybbN	1	b0492	ECK120002876	517425	518279	reverse			Uncharacterized protein YbbN	284	chaperone and weak protein oxidoreductase	P77395
ybbO	1	b0493	ECK120002877	518340	519149	reverse			Uncharacterized oxidoreductase YbbO (EC 1.-.-.-)	269	NADP<sup>+</sup>-dependent aldehyde reductase	P0AFP4
tesA	1	b0494	ECK120001496	519139	519765	reverse			Thioesterase 1/protease 1/lysophospholipase L1 (TAP) (Acyl-CoA thioesterase 1) (TESA) (EC 3.1.2.2) (Acyl-CoA thioesterase I) (Arylesterase) (EC 3.1.1.2) (Lysophospholipase L1) (EC 3.1.1.5) (Oleoyl-[acyl-carrier-protein] hydrolase) (EC 3.1.2.14) (Phospholipid degradation C) (Pldc) (Protease 1) (EC 3.4.21.-) (Protease I) (Thioesterase I/protease I) (TEP-I)	208	multifunctional acyl-CoA thioesterase I and protease I and lysophospholipase L1	P0ADA1
ybbA	1	b0495	ECK120001600	519733	520419	forward			Uncharacterized ABC transporter ATP-binding protein YbbA	228	putative transport protein, ABC superfamily - ATP-binding component	P0A9T8
ybbP	1	b0496	ECK120002878	520416	522830	forward			Uncharacterized ABC transporter permease YbbP	804	putative transport protein, ABC superfamily - membrane component	P77504
rhsD	1	b0497	ECK120000840	523261	527541	forward			Protein RhsD	1426	RhsD protein in rhs element	P16919
ybbC	1	b0498	ECK120001705	527581	527949	forward			Uncharacterized protein YbbC	122	putative protein	P33668
ylbH	1	b0499	ECK120001706	527949	528659	forward			Putative uncharacterized protein YlbH	236	conserved protein, rhs-like	P77759
ybbD	9	b0500	ECK120002880	528640	528900	forward			Putative uncharacterized protein YbbD	86	putative protein	P33669
ylbG	1	b0502	ECK120002881	529645	530016	reverse			Putative uncharacterized protein YlbG	123	predicted DNA-binding transcriptional regulator	P77688
selU	1	b0503	ECK120001704	530132	531226	reverse			tRNA 2-selenouridine synthase (EC 2.9.1.-) (Selenophosphate-dependent tRNA 2-selenouridine synthase)	364	tRNA 2-selenouridine synthase	P33667
allS	1	b0504	ECK120002882	531295	532221	reverse			HTH-type transcriptional activator AllS	308	AllS transcriptional activator	P0ACR0
allA	1	b0505	ECK120002883	532451	532933	forward			Ureidoglycolate lyase (EC 4.3.2.3) (Ureidoglycolatase) (Ureidoglycolate hydrolase)	160	ureidoglycolate lyase	P77731
allR	1	b0506	ECK120002884	533011	533826	forward			HTH-type transcriptional repressor AllR (Negative regulator of allantoin and glyoxylate utilization operons)	271	AllR DNA-binding transcriptional repressor	P0ACN4
gcl	1	b0507	ECK120001534	533916	535697	forward			Glyoxylate carboligase (EC 4.1.1.47) (Tartronate-semialdehyde synthase)	593	glyoxylate carboligase	P0AEP7
hyi	1	b0508	ECK120002885	535710	536486	forward			Hydroxypyruvate isomerase (EC 5.3.1.22) (Glyoxylate-induced protein)	258	hydroxypyruvate isomerase	P30147
glxR	1	b0509	ECK120002886	536586	537464	forward			2-hydroxy-3-oxopropionate reductase (EC 1.1.1.60) (Tartronate semialdehyde reductase) (TSAR)	292	tartronate semialdehyde reductase 2	P77161
ybbW	1	b0511	ECK120002888	537633	539087	forward			Putative allantoin permease (Allantoin transport protein)	484	putative transporter, nucleobase:cation symporter-1 (NCS1) family	P75712
allB	1	b0512	ECK120002889	539147	540508	forward			Allantoinase (EC 3.5.2.5) (Allantoin-utilizing enzyme)	453	allantoinase	P77671
ybbY	1	b0513		540565	541866	forward			Putative purine permease YbbY	433	putative transport protein, nucleobase:cation symporter-2 (NCS2) family	P77328
glxK	1	b0514	ECK120002890	541888	543033	forward			Glycerate 3-kinase (EC 2.7.1.31) (D-Glycerate-3-kinase) (Glycerate kinase 2) (GK2)	381	glycerate kinase II	P77364
allE	1	b0515	ECK120002891	543261	544046	reverse			(S)-ureidoglycine aminohydrolase (UGHY) (UGlyAH) (EC 3.5.3.26)	261	<i>S</i>-ureidoglycine aminohydrolase	P75713
allC	1	b0516	ECK120002892	544057	545292	reverse			Allantoate amidohydrolase (AAH) (EC 3.5.3.9) (Allantoate deiminase)	411	allantoate amidohydrolase	P77425
allD	1	b0517	ECK120002893	545314	546363	reverse			Ureidoglycolate dehydrogenase (NAD(+)) (EC 1.1.1.350)	349	ureidoglycolate dehydrogenase	P77555
fdrA	1	b0518	ECK120002895	546680	548347	forward			Protein FdrA	555	predicted acyl-CoA synthetase with NAD(P)-binding Rossmann-fold domain	Q47208
ylbE	1		ECK120002457	548357	549616	forward			Uncharacterized protein YlbE	419	uncharacterized protein YlbE	P77129
ylbF	1	b0520	ECK120002896	549627	550442	forward			Uncharacterized protein YlbF	271	conserved protein	P0AAS5
ybcF	1	b0521	ECK120002897	550439	551332	forward			Carbamate kinase (EC 2.7.2.2)	297	predicted carbamate kinase	P37306
purK	1	b0522	ECK120002249	551527	552594	reverse			N5-carboxyaminoimidazole ribonucleotide synthase (N5-CAIR synthase) (EC 6.3.4.18) (5-(carboxyamino)imidazole ribonucleotide synthetase)	355	<i>N</i><sup>5</sup>-carboxyaminoimidazole ribonucleotide synthetase	P09029
purE	1	b0523	ECK120000787	552591	553100	reverse			N5-carboxyaminoimidazole ribonucleotide mutase (N5-CAIR mutase) (EC 5.4.99.18) (5-(carboxyamino)imidazole ribonucleotide mutase)	169	<i>N<sup>5</sup></i>-carboxyaminoimidazole ribonucleotide mutase	P0AG18
lpxH	1	b0524	ECK120000784	553218	553940	reverse			UDP-2,3-diacylglucosamine hydrolase (EC 3.6.1.54) (UDP-2,3-diacylglucosamine diphosphatase) (UDP-2,3-diacylglucosamine pyrophosphatase)	240	UDP-2,3-diacylglucosamine hydrolase	P43341
ppiB	1	b0525	ECK120002352	553943	554437	reverse			Peptidyl-prolyl cis-trans isomerase B (PPIase B) (EC 5.2.1.8) (Rotamase B)	164	peptidyl-prolyl <i>cis-trans</i> isomerase B (rotamase B)	P23869
cysS	1	b0526	ECK120000749	554611	555996	forward			Cysteine--tRNA ligase (EC 6.1.1.16) (Cysteinyl-tRNA synthetase) (CysRS)	461	cysteine-tRNA ligase	P21888
ybcI	5	b0527	ECK120000191	556032	556553	reverse			Inner membrane protein YbcI	173	conserved inner membrane protein	P45570
ybcJ	2	b0528	ECK120002366	556661	556873	reverse			Uncharacterized protein YbcJ	70	putative RNA-binding protein	P0AAS7
folD	1	b0529	ECK120002418	556875	557741	reverse			Bifunctional protein FolD [Includes: Methylenetetrahydrofolate dehydrogenase (EC 1.5.1.5); Methenyltetrahydrofolate cyclohydrolase (EC 3.5.4.9)]	288	bifunctional 5,10-methylene-tetrahydrofolate dehydrogenase/ 5,10-methylene-tetrahydrofolate cyclohydrolase	P24186
sfmA	1	b0530	ECK120000322	558212	558754	forward			Uncharacterized fimbrial-like protein SfmA (Type-1A pilin)	180	predicted fimbrial-like adhesin protein	P0ABW5	yes
sfmC	1	b0531	ECK120002898	558974	559666	forward			Probable fimbrial chaperone SfmC	230	predicted pilin chaperone, periplasmic	P77249
sfmD	1	b0532	ECK120002899	559697	562300	forward			Outer membrane usher protein SfmD	867	predicted outer membrane export usher protein	P77468
sfmH	1	b0533	ECK120002900	562336	563319	forward			Uncharacterized fimbrial-like protein SfmH	327	predicted fimbrial-like adhesin protein	P75715	yes
sfmF	1	b0534	ECK120002901	563330	563845	forward			Uncharacterized fimbrial-like protein SfmF	171	predicted fimbrial-like adhesin protein	P38052	yes
fimZ	1	b0535	ECK120002253	563848	564480	reverse			Fimbriae Z protein	210	FimZ transcriptional regulator	P0AEL8
intD	1	b0537	ECK120000500	564815	565978	reverse			Prophage integrase IntD (Prophage DLP12 integrase) (Prophage QSR' integrase)	387	DLP12 prophage; predicted integrase	P24218		DLP12
ybcC	1	b0539	ECK120026446	566098	566361	reverse			Putative uncharacterized protein ExoD	87	DLP12 prophage; predicted exonuclease	P75717		(DLP12)
ybcD	2		ECK120002903	566451	566687	forward			Putative uncharacterized protein PeaD	78	DLP12 prophage; predicted replication protein fragment	P77528		(DLP12)
insE-3	2	b0540	ECK120023909	566842	567141	forward		BioCyc: gene starts at 566842 and not at 566833	Transposase InsE for insertion sequence IS3C	99	DLP12 prophage; IS3 element protein InsE	P0CF68		(DLP12)
insF-3	1	b0541	ECK120002904	567138	568004	forward			Transposase InsF for insertion sequence IS3C	288		P0CF81		(DLP12)
renD	5	b0542	ECK120002905	568062	568247	forward			Putative protein RenD (Putative defective protein Ren from DLP12 prophage)	61	DLP12 prophage; predicted protein	P75718		DLP12
emrE	1	b0543	ECK120002906	568315	568647	forward			Multidrug transporter EmrE (Efflux-multidrug resistance protein EmrE) (Ethidium resistance protein) (Methyl viologen resistance protein C)	110	multidrug / betaine / choline efflux transporter EmrE	P23895		DLP12
ybcK	1	b0544	ECK120000622	568902	570428	forward			Uncharacterized protein YbcK	508	DLP12 prophage; predicted recombinase	P77698		DLP12
ybcL	1	b0545	ECK120002908	570893	571444	forward			UPF0098 protein YbcL	183	DLP12 prophage; periplasmic protein	P77368		DLP12
ybcM	1	b0546	ECK120002910	571454	572251	forward			Uncharacterized HTH-type transcriptional regulator YbcM	265	DLP12 prophage; predicted DNA-binding transcriptional regulator	P77634		DLP12
ylcH	11	b4588	ECK120002921	572368	572469	forward			Uncharacterized protein YlcH	33	DLP12 prophage; hypothetical protein	Q47268		DLP12
ybcN	6	b0547	ECK120030068	572466	572921	forward			Uncharacterized protein YbcN	151	DLP12 prophage; DNA base-flipping protein	Q47269		DLP12
ninE	9	b0548	ECK120002911	572921	573091	forward			Prophage NinE homolog (Protein NinE homolog from lambdoid prophage DLP12)	56	DLP12 prophage, conserved protein similar to phage 82 and lambda proteins	Q47270		DLP12
ybcO	2	b0549	ECK120002912	573084	573374	forward			Putative nuclease YbcO (EC 3.1.-.-)	96	DLP12 prophage; predicted protein	P68661		DLP12
rusA	1	b0550	ECK120002914	573371	573733	forward			Crossover junction endodeoxyribonuclease RusA (EC 3.1.22.4) (Holliday junction nuclease RusA) (Holliday junction resolvase)	120	endodeoxyribonuclease RUS (Holliday junction resolvase)	P0AG74		DLP12
ylcG	9	b4509	ECK120002918	573730	573870	forward			Uncharacterized protein YlcG	46	DLP12 prophage; small protein	Q47272		DLP12
ybcQ	2	b0551	ECK120002915	573956	574339	forward			Prophage antitermination protein Q homolog QuuD (Antitermination protein Q homolog from lambdoid prophage DLP12)	127	DLP12 prophage; predicted antitermination protein	Q47274	yes	(DLP12)
insH-2	1	b0552	ECK125122009	574737	575753	reverse			Transposase InsH for insertion sequence element IS5B	338	DLP12 prophage; IS5 transposase and trans-activator	P0CE50		(DLP12)
nmpC	1	b0553	ECK120002916	575758	576825	reverse			Putative outer membrane porin protein NmpC	355	outer membrane porin protein; locus of qsr prophage	P21420		DLP12
essD	5	b0554	ECK120000652	577398	577613	forward			Prophage lysis protein S homolog EssD (Lysis protein S homolog from lambdoid prophage DLP12)	71	DLP12 prophage; predicted phage lysis protein	P0A9R2		DLP12
rrrD	1	b0555	ECK120002917	577613	578110	forward			Lysozyme RrrD (EC 3.2.1.17) (Endolysin) (Lysis protein) (Muramidase)	165	DLP12 prophage; lysozyme	P78285		(DLP12)
rzpD	1	b0556	ECK120002919	578107	578568	forward			Prophage Rz endopeptidase RzpD (EC 3.4.-.-)	153	DLP12 prophage; predicted murein endopeptidase	P75719		DLP12
rzoD	9	b4510	ECK120000287	578327	578509	forward			Prophage outer membrane lipoprotein RzoD (o-spanin) (Outer membrane lipoprotein Rz1 from lambdoid prophage DLP12) (Spanin from lambdoid prophage DLP12, outer membrane subunit)	60	DLP12 prophage; predicted lipoprotein	P58041		DLP12
borD	3	b0557	ECK120016288	578600	578893	reverse			Prophage lipoprotein Bor homolog (Lipoprotein Bor homolog from lambdoid prophage DLP12)	97	lipoprotein <i>bor</I> homolog from lambdoid prophage DLP12	P77330		DLP12
ybcV	5	b0558	ECK120002920	579184	579594	reverse			Uncharacterized protein YbcV	136	DLP12 prophage; predicted protein	P77598		DLP12
ybcW	9	b0559	ECK120002922	579880	580086	forward			Uncharacterized protein YbcW	68	DLP12 prophage; predicted protein	P64435		DLP12
ylcI	5	b4589	ECK120000744	580251	580445	reverse			Uncharacterized protein YlcI	64	hypothetical protein	A5A607		(DLP12)
nohB	1	b0560	ECK120030069	580834	581379	forward			DNA-packaging protein NU1 homolog	181	DLP12 prophage; DNA packaging protein	P31062		DLP12
tfaD	1	b0561	ECK120001582	581534	582097	forward			Putative protein TfaD (Putative tail fiber assembly protein homolog from lambdoid prophage DLP12)	187	DLP12 prophage; predicted tail fiber assembly protein	P77699		DLP12
ybcY	1	b0562	ECK120002923	582152	582736	reverse			Putative uncharacterized protein YbcY	194	DLP12 prophage; predicted SAM-dependent methyltransferase	P77460		DLP12
tfaX	1	b0563	ECK120002924	582875	583060	forward			Putative uncharacterized protein TfaX	61	DLP12 prophage; predicted protein	P77087		DLP12
appY	1	b0564	ECK120002925	583681	584430	forward			HTH-type transcriptional regulator AppY (M5 polypeptide)	249	AppY DNA-binding transcriptional activator	P05052		DLP12
ompT	1	b0565	ECK120000046	584680	585633	reverse			Protease 7 (EC 3.4.23.49) (Omptin) (Outer membrane protein 3B) (Protease A) (Protease VII)	317	outer membrane protease VII (outer membrane protein 3b)	P09169		DLP12
envY	5	b0566	ECK120000666	586147	586908	reverse			Porin thermoregulatory protein EnvY	253	EnvY DNA-binding transcriptional activator	P10805
ybcH	5	b0567	ECK120000262	587091	587981	reverse			Uncharacterized protein YbcH	296	putative protein	P37325
nfrA	1	b0568	ECK120002300	587982	590954	reverse			Bacteriophage adsorption protein A (Bacteriophage N4 adsorption protein A)	990	bacteriophage N4 receptor, outer membrane protein	P31600
nfrB	1	b0569	ECK120001679	590941	593178	reverse			Bacteriophage adsorption protein B (Bacteriophage N4 adsorption protein B)	745	bacteriophage N4 receptor, inner membrane subunit	P0AFA5
cusS	1	b0570	ECK120001678	593328	594770	reverse			Sensor kinase CusS (EC 2.7.13.3)	480	CusS sensory histidine kinase	P77485
cusR	1	b0571	ECK120002926	594760	595443	reverse			Transcriptional regulatory protein CusR	227	CusR transcriptional activator	P0ACZ8
cusC	1	b0572	ECK120002927	595600	596973	forward			Cation efflux system protein CusC	457	copper / silver exporter - outer membrane porin	P77211
cusF	1	b0573	ECK120002928	597131	597463	forward			Cation efflux system protein CusF	110	copper / silver exporter - periplasmic binding protein and metallochaperone	P77214
cusB	1	b0574	ECK120002929	597479	598702	forward			Cation efflux system protein CusB	407	copper / silver exporter - membrane fusion protein	P77239
cusA	1	b0575	ECK120002930	598714	601857	forward			Cation efflux system protein CusA	1047	copper / silver exporter - membrane subunit	P38054
pheP	1	b0576	ECK120002235	601959	603335	forward			Phenylalanine-specific permease	458	phenylalanine:H<sup>+</sup> symporter PheP	P24207
ybdG	1	b0577	ECK120000700	603416	604663	reverse			Miniconductance mechanosensitive channel YbdG	415	mechanosensitive channel of miniconductance YbdG	P0AAT4
nfsB	1	b0578	ECK120002931	604771	605424	reverse			Oxygen-insensitive NAD(P)H nitroreductase (EC 1.-.-.-) (Dihydropteridine reductase) (EC 1.5.1.34) (FMN-dependent nitroreductase)	217	NAD(P)H nitroreductase NfsB	P38489
ybdF	1	b0579	ECK120002564	605518	605886	reverse			Uncharacterized protein YbdF	122	conserved protein	P0AAT2
ybdJ	2	b0580	ECK120002932	605951	606199	reverse			Uncharacterized protein YbdJ	82	predicted inner membrane protein	P77506
ybdK	1	b0581	ECK125240990	606265	607383	reverse			Putative glutamate--cysteine ligase 2 (EC 6.3.2.2) (Gamma-glutamylcysteine synthetase 2) (GCS 2) (Gamma-GCS 2)	372	carboxylate-amine ligase	P77213
hokE	5	b4415	ECK120003018	607836	607988	forward			Toxic protein HokE	50	HokE	P77091
insL-2	1	b0582	ECK120002654	608065	609177	forward			Putative transposase InsL for insertion sequence element IS186B	370	IS186/IS421 transposase	P0CF92
entD	1	b0583	ECK120002935	609459	610079	reverse			Enterobactin synthase component D (4'-phosphopantetheinyl transferase EntD) (EC 2.7.8.-) (Enterochelin synthase D)	206	phosphopantetheinyl transferase/phosphopantetheinyl transferase	P19925
fepA	1	b0584	ECK120000256	610254	612494	reverse			Ferrienterobactin receptor (Enterobactin outer-membrane receptor)	746	ferric enterobactin / colicin B / colicin D outer membrane porin FepA	P05825
fes	1	b0585	ECK120000293	612737	613939	forward			Enterochelin esterase (Ferric enterobactin esterase)	400	enterochelin esterase	P13039
ybdZ	2	b4511	ECK120001093	613942	614160	forward			Enterobactin biosynthesis protein YbdZ	72	MbtH-like protein that enhances the catalytic function of EntF	P18393
entF	1	b0586	ECK120016289	614157	618038	forward			Enterobactin synthase component F (EC 2.7.7.-) (Enterochelin synthase F) (Serine-activating enzyme) (Seryl-AMP ligase)	1293	apo-serine activating enzyme	P11454
fepE	1	b0587	ECK120000258	618254	619387	forward			Ferric enterobactin transport protein FepE	377	ferric enterobactin (enterochelin) transport	P26266
fepC	1	b0588	ECK120000291	619384	620199	reverse			Ferric enterobactin transport ATP-binding protein FepC	271	ferric enterobactin ABC transporter - ATP binding subunit	P23878
fepG	1	b0589	ECK120000289	620196	621188	reverse			Ferric enterobactin transport system permease protein FepG	330	ferric enterobactin ABC transporter - membrane subunit	P23877
fepD	1	b0590	ECK120000292	621185	622189	reverse			Ferric enterobactin transport system permease protein FepD	334	ferric enterobactin ABC transporter - membrane subunit	P23876
entS	1	b0591	ECK120000290	622300	623550	forward			Enterobactin exporter EntS (Protein p43)	416	enterobactin exporter EntS	P24077
fepB	1	b0592	ECK120001092	623554	624510	reverse			Ferrienterobactin-binding periplasmic protein	318	ferric enterobactin ABC transporter - periplasmic binding protein	P0AEL6
entC	1	b0593	ECK120000288	624885	626060	forward			Isochorismate synthase EntC (EC 5.4.4.2) (Isochorismate mutase)	391	isochorismate synthase 1	P0AEJ2
entE	1	b0594	ECK120000255	626070	627680	forward			Enterobactin synthase component E (EC 6.3.2.14) (2,3-dihydroxybenzoate-AMP ligase) (DHB-AMP ligase) (2,3-dihydroxybenzoate-AMP synthase) (EC 2.7.7.58) (Dihydroxybenzoic acid-activating enzyme) (Enterochelin synthase E) (S-dihydroxybenzoyltransferase) (EC 2.5.1.-)	536	2,3-dihydroxybenzoate-AMP ligase	P10378
entB	1	b0595	ECK120000257	627694	628551	forward			Enterobactin synthase component B (EC 6.3.2.14) (Enterobactin biosynthesis bifunctional protein EntB) (Enterochelin synthase B) [Includes: Isochorismatase (EC 3.3.2.1) (2,3-dihydro-2,3-dihydroxybenzoate synthase) (Isochorismate lyase); Aryl carrier protein (ArCP)]	285	EntB	P0ADI4
entA	1	b0596	ECK120000254	628551	629297	forward			2,3-dihydro-2,3-dihydroxybenzoate dehydrogenase (DiDHB-DH) (EC 1.3.1.28) (Trans-2,3-dihydro-2,3-dihydroxybenzoate dehydrogenase)	248	2,3-dihydro-2,3-dihydroxybenzoate dehydrogenase	P15047
entH	1	b0597	ECK120000253	629300	629713	forward			Proofreading thioesterase EntH (EC 3.1.2.-) (Enterobactin synthase component H) (p15)	137	proofreading thioesterase in enterobactin biosynthesis	P0A8Y8
cstA	1	b0598	ECK120000163	629894	631999	forward			Peptide transporter CstA (Carbon starvation protein A)	701	peptide transporter induced by carbon starvation	P15078
ybdD	1	b4512	ECK120000507	632182	632379	forward			Uncharacterized protein YbdD	65	conserved protein	P0AAS9
ybdH	1	b0599	ECK120016290	632389	633477	reverse			Hydroxycarboxylate dehydrogenase A (EC 1.1.1.-) (2-oxobutanoate reductase) (2-oxoglutarate reductase)	362	predicted oxidoreductase	P45579
ybdL	1	b0600	ECK120002357	633586	634746	forward			Methionine aminotransferase (EC 2.6.1.88) (Methionine-oxo-acid transaminase)	386	methionine-oxo-acid transaminase, PLP-dependent	P77806
ybdM	1	b0601	ECK120002936	634747	635376	reverse			Uncharacterized protein YbdM	209	conserved protein	P77174
ybdN	1	b0602	ECK120002937	635349	636569	reverse			Uncharacterized protein YbdN	406	conserved protein	P77216
ybdO	1	b0603	ECK120002938	636716	637618	reverse			Uncharacterized HTH-type transcriptional regulator YbdO	300	predicted DNA-binding transcriptional regulator LYSR-type	P77746
dsbG	1	b0604	ECK120002939	637827	638573	reverse			Thiol:disulfide interchange protein DsbG	248	DsbG<SUB>reduced</SUB>	P77202
ahpC	1	b0605	ECK120002940	638945	639508	forward			Alkyl hydroperoxide reductase C (EC 1.11.1.15) (Alkyl hydroperoxide reductase protein C22) (Peroxiredoxin) (SCRP-23) (Sulfate starvation-induced protein 8) (SSI8) (Thioredoxin peroxidase)	187	alkyl hydroperoxide reductase, AhpC component	P0AE08
ahpF	1	b0606	ECK120001351	639753	641318	forward			Alkyl hydroperoxide reductase subunit F (EC 1.8.1.-) (Alkyl hydroperoxide reductase F52A protein)	521	alkyl hydroperoxide reductase, AhpF component	P35340
uspG	1	b0607	ECK120001352	641439	641867	reverse			Universal stress protein UP12 (Universal stress protein G)	142	universal stress protein UP12	P39177
ybdR	1	b0608	ECK120002942	642088	643326	forward			Uncharacterized zinc-type alcohol dehydrogenase-like protein YbdR (EC 1.-.-.-)	412	predicted oxidoreductase, Zn-dependent and NAD(P)-binding	P77316
rnk	1	b0610	ECK120002943	643557	643967	reverse			Regulator of nucleoside diphosphate kinase	136	regulator of nucleoside diphosphate kinase	P0AFW4
rna	1	b0611	ECK120002944	644197	645003	reverse			Ribonuclease I (RNase I) (EC 3.1.27.6) (Enterobacter ribonuclease)	268	RNase I, cleaves phosphodiester bond between any two nucleotides	P21338
citT	1	b0612	ECK120000847	645117	646580	reverse			Citrate/succinate antiporter (Citrate carrier) (Citrate transporter)	487	citrate:succinate antiporter	P0AE74
citG	1	b0613	ECK120002945	646631	647509	reverse			2-(5''-triphosphoribosyl)-3'-dephosphocoenzyme-A synthase (2-(5''-triphosphoribosyl)-3'-dephospho-CoA synthase) (EC 2.4.2.52)	292	triphosphoribosyl-dephospho-CoA synthase	P77231
citX	2	b0614	ECK120002946	647484	648035	reverse			Apo-citrate lyase phosphoribosyl-dephospho-CoA transferase (EC 2.7.7.61) (Apo-ACP nucleodityltransferase) (Holo-ACP synthase) (Holo-citrate lyase synthase)	183	apo-citrate lyase phosphoribosyl-dephospho-CoA transferase	P0A6G5
citF	1	b0615	ECK120002947	648039	649571	reverse			Citrate lyase alpha chain (Citrase alpha chain) (EC 4.1.3.6) (Citrate (pro-3S)-lyase alpha chain) (Citrate CoA-transferase subunit) (EC 2.8.3.10)	510	citrate lyase, citrate-ACP transferase &alpha; subunit	P75726
citE	1	b0616	ECK120002948	649582	650490	reverse			Citrate lyase subunit beta (Citrase beta chain) (EC 4.1.3.6) (Citrate (pro-3S)-lyase subunit beta) (Citryl-CoA lyase subunit) (EC 4.1.3.34)	302	citrate lyase, citryl-ACP lyase &beta; subunit	P0A9I1
citD	1	b0617	ECK120002949	650487	650783	reverse			Citrate lyase acyl carrier protein (Citrate lyase gamma chain)	98	citrate lyase, acyl carrier &gamma; subunit	P69330
citC	1	b0618	ECK120002950	650798	651856	reverse			[Citrate [pro-3S]-lyase] ligase (EC 6.2.1.22) (Acetate:SH-citrate lyase ligase) (Citrate lyase synthetase)	352	citrate lyase synthetase	P77390
dpiB	1	b0619	ECK120002951	652235	653893	forward			Sensor histidine kinase DpiB (EC 2.7.13.3) (Sensor histidine kinase CitA)	552	DpiB sensory histidine kinase	P77510
dpiA	1	b0620	ECK120002952	653862	654542	forward			Transcriptional regulatory protein DpiA (Destabilizer of plasmid inheritance)	226	DpiA transcriptional dual regulator	P0AEF4
dcuC	1	b0621	ECK120002953	654583	655968	reverse			Anaerobic C4-dicarboxylate transporter DcuC	461	dicarboxylate transporter DcuC	P0ABP3
pagP	1	b0622	ECK120002954	656557	657117	forward			Lipid A palmitoyltransferase PagP (EC 2.3.1.251) (Lipid A acylation protein)	186	palmitoyl transferase for Lipid A	P37001
cspE	1	b0623	ECK120002073	657292	657501	forward			Cold shock-like protein CspE (CSP-E)	69	transcription antiterminator and regulator of RNA stability	P0A972
crcB	1	b0624	ECK120002072	657555	657938	reverse			Putative fluoride ion transporter CrcB	127	F<sup>-</sup> exporter / involved in resistance to camphor-induced chromosome decondensation	P37002
ybeM_1	1	b0625	ECK120002096	658031	658258	forward	Split gene (partner ybeM_2)	BioCyc: deamidated glutathione amidase, N-terminal fragment	Putative protein YbeH	75	predicted protein of C-N hydrolase superfamily, N-terminal fragment	P0DP63
ybeM_2	Split gene	b0626	ECK120002095	658255	658818	forward	Split gene (partner ybeM_1)	BioCyc: deamidated glutathione amidase, C-terminal fragment	Putative protein YbeM	187	predicted protein of C-N hydrolase superfamily, C-terminal fragment	P0DP64
tatE	1	b0627	ECK120002955	658947	659150	forward			Sec-independent protein translocase protein TatE	67	twin arginine protein translocation system - TatE protein	P0A843
lipA	1	b0628	ECK120001278	659251	660216	reverse			Lipoyl synthase (EC 2.8.1.8) (Lip-syn) (LS) (Lipoate synthase) (Lipoic acid synthase) (Sulfur insertion protein LipA)	321	lipoyl synthase	P60716
ybeF	1	b0629	ECK120001279	660425	661378	reverse			Uncharacterized HTH-type transcriptional regulator YbeF	317	predicted DNA-binding transcriptional regulator, LYSR-type	P30979
lipB	1	b0630	ECK120001542	661637	662278	reverse			Octanoyltransferase (EC 2.3.1.181) (Lipoate-protein ligase B) (Lipoyl/octanoyl transferase) (Octanoyl-[acyl-carrier-protein]-protein N-octanoyltransferase)	213	lipoyl(octanoyl) transferase	P60720
ybeD	1	b0631	ECK120001540	662379	662642	reverse			UPF0250 protein YbeD	87	conserved protein	P0A8J4
dacA	1	b0632	ECK120001541	662752	663963	reverse			D-alanyl-D-alanine carboxypeptidase DacA (DD-carboxypeptidase) (DD-peptidase) (EC 3.4.16.4) (Beta-lactamase) (EC 3.5.2.6) (Penicillin-binding protein 5) (PBP-5)	403	D-alanyl-D-alanine carboxypeptidase, fraction A; penicillin-binding protein 5	P0AEB2
rlpA	1	b0633	ECK120000195	664102	665190	reverse			Endolytic peptidoglycan transglycosylase RlpA (EC 4.2.2.-) (Rare lipoprotein A)	362	rare lipoprotein RlpA	P10100
mrdB	1	b0634	ECK120000845	665201	666313	reverse			Peptidoglycan glycosyltransferase MrdB (PGT) (EC 2.4.1.129) (Cell elongation protein RodA) (Cell wall polymerase) (Peptidoglycan polymerase) (PG polymerase) (Rod shape-determining protein)	370	rod shape-determining, dynamic inner membrane protein	P0ABG7
mrdA	1	b0635	ECK120000600	666316	668217	reverse			Peptidoglycan D,D-transpeptidase MrdA (EC 3.4.16.4) (Penicillin-binding protein 2) (PBP-2)	633	peptidoglycan D,D-transpeptidase	P0AD65
rlmH	1	b0636	ECK120000599	668248	668715	reverse			Ribosomal RNA large subunit methyltransferase H (EC 2.1.1.177) (23S rRNA (pseudouridine1915-N3)-methyltransferase) (23S rRNA m3Psi1915 methyltransferase) (rRNA (pseudouridine-N3-)-methyltransferase RlmH)	155	23S rRNA m<sup>3</sup>&Psi;1915 methyltransferase	P0A8I8
rsfS	1	b0637	ECK120001229	668719	669036	reverse			Ribosomal silencing factor RsfS	105	ribosomal silencing factor	P0AAT6
cobC	1	b0638	ECK120001230	669296	669907	reverse			Adenosylcobalamin/alpha-ribazole phosphatase (EC 3.1.3.73) (Adenosylcobalamin phosphatase) (Alpha-ribazole-5'-phosphate phosphatase)	203	predicted adenosylcobalamin phosphatase/&alpha;-ribazole phosphatase	P52086
nadD	1	b0639	ECK120002956	669931	670572	reverse			Nicotinate-nucleotide adenylyltransferase (EC 2.7.7.18) (Deamido-NAD(+) diphosphorylase) (Deamido-NAD(+) pyrophosphorylase) (Nicotinate mononucleotide adenylyltransferase) (NaMN adenylyltransferase)	213	nicotinate-mononucleotide adenylyltransferase	P0A752
holA	1	b0640	ECK120002957	670574	671605	reverse			DNA polymerase III subunit delta (EC 2.7.7.7)	343	DNA polymerase III, &delta; subunit	P28630
lptE	1	b0641	ECK120001378	671605	672186	reverse			LPS-assembly lipoprotein LptE (Rare lipoprotein B)	193	outer membrane lipopolysaccharide transport and assembly complex - LptE subunit	P0ADC1
leuS	1	b0642	ECK120000846	672201	674783	reverse			Leucine--tRNA ligase (EC 6.1.1.4) (Leucyl-tRNA synthetase) (LeuRS)	860	leucine-tRNA ligase	P07813
ybeL	1	b0643	ECK120000525	675018	675500	forward			Uncharacterized protein YbeL	160	conserved protein	P0AAT9
ybeQ	1	b0644	ECK120002400	675570	676547	reverse			Sel1-repeat-containing protein YbeQ	325	conserved protein	P77234
ybeR	1	b0645	ECK120002958	676711	677418	forward			Uncharacterized protein YbeR	235	putative protein	P77627
djlB	1	b0646	ECK120002959	677415	678842	forward			Uncharacterized J domain-containing protein DjlB	475	predicted chaperone	P77381
ybeT	1	b0647	ECK120002960	678852	679406	reverse			Sel1-repeat-containing protein YbeT	184	conserved outer membrane protein	P77296
ybeU	1	b0648	ECK120002961	679508	680215	forward			Uncharacterized protein YbeU	235	predicted tRNA ligase	P77427
djlC	1	b0649	ECK120002962	680212	681663	forward			Uncharacterized J domain-containing protein DjlC	483	Hsc56, co-chaperone of Hsc62	P77359
hscC	1	b0650	ECK120002963	681723	683393	reverse			Chaperone protein HscC (Hsc62)	556	Hsc62, Hsp70 family chaperone, binds to RpoD and inhibits transcription	P77319
rihA	1	b0651	ECK120002964	683477	684412	reverse			Pyrimidine-specific ribonucleoside hydrolase RihA (EC 3.2.-.-) (Cytidine/uridine-specific hydrolase)	311	ribonucleoside hydrolase 1 (pyrimidine-specific)	P41409
gltL	1	b0652	ECK120002965	684530	685255	reverse			Glutamate/aspartate import ATP-binding protein GltL (EC 3.6.3.21)	241	glutamate / aspartate ABC transporter - ATP binding subunit	P0AAG3
gltK	1	b0653	ECK120002351	685255	685929	reverse			Glutamate/aspartate import permease protein GltK	224	glutamate / aspartate ABC transporter - membrane subunit	P0AER5
gltJ	1	b0654	ECK120002349	685929	686669	reverse			Glutamate/aspartate import permease protein GltJ	246	glutamate / aspartate ABC transporter - membrane subunit	P0AER3
gltI	1	b0655	ECK120002643	686839	687747	reverse			Glutamate/aspartate import solute-binding protein	302	glutamate / aspartate ABC transporter - periplasmic binding protein	P37902
insH-3	1	b0656	ECK120002966	687997	689013	reverse			Transposase InsH for insertion sequence element IS5D	338	IS5 transposase and trans-activator	P0CE51
lnt	1	b0657	ECK120002967	689343	690881	reverse			Apolipoprotein N-acyltransferase (ALP N-acyltransferase) (EC 2.3.1.-) (Copper homeostasis protein CutE)	512	apolipoprotein N-acyltransferase	P23930
ybeX	1	b0658	ECK120000164	690906	691784	reverse			Magnesium and cobalt efflux protein CorC	292	putative transport protein	P0AE78
ybeY	1	b0659	ECK120002968	691874	692341	reverse			Endoribonuclease YbeY (EC 3.1.-.-)	155	endoribonuclease involved in maturation of 16S rRNA and ribosome quality control	P0A898
ybeZ	1	b0660	ECK120002969	692338	693378	reverse			PhoH-like protein	346	predicted protein with nucleoside triphosphate hydrolase domain	P0A9K3
miaB	1	b0661	ECK120002970	693531	694955	reverse			tRNA-2-methylthio-N(6)-dimethylallyladenosine synthase (EC 2.8.4.3) ((Dimethylallyl)adenosine tRNA methylthiotransferase MiaB) (tRNA-i(6)A37 methylthiotransferase)	474	isopentenyl-adenosine A37 tRNA methylthiolase	P0AEI1
ubiF	1	b0662	ECK120002971	695101	696276	forward			2-octaprenyl-3-methyl-6-methoxy-1,4-benzoquinol hydroxylase (EC 1.14.13.-)	391	2-octaprenyl-3-methyl-6-methoxy-1,4-benzoquinone hydroxylase	P75728
asnB	1	b0674	ECK120002500	697513	699177	reverse			Asparagine synthetase B [glutamine-hydrolyzing] (AS-B) (EC 6.3.5.4)	554	asparagine synthetase B	P22106
umpH	1	b0675	ECK120000088	699574	700326	reverse			Ribonucleotide monophosphatase NagD (EC 3.1.3.5)	250	UMP phosphatase	P0AF24
nagC	1	b0676	ECK120000627	700374	701594	reverse			N-acetylglucosamine repressor	406	NagC DNA-binding transcriptional dual regulator	P0AF20
nagA	1	b0677	ECK120000629	701603	702751	reverse			N-acetylglucosamine-6-phosphate deacetylase (GlcNAc 6-P deacetylase) (EC 3.5.1.25)	382	<i>N</i>-acetylglucosamine-6-phosphate deacetylase	P0AF18
nagB	1	b0678	ECK120000625	702811	703611	reverse			Glucosamine-6-phosphate deaminase (EC 3.5.99.6) (GlcN6P deaminase) (GNPDA) (Glucosamine-6-phosphate isomerase)	266	glucosamine-6-phosphate deaminase	P0A759
nagE	1	b0679	ECK120000626	703944	705890	forward			PTS system N-acetylglucosamine-specific EIICBA component (EIICBA-Nag) (EII-Nag) [Includes: N-acetylglucosamine permease IIC component (PTS system N-acetylglucosamine-specific EIIC component); N-acetylglucosamine-specific phosphotransferase enzyme IIB component (EC 2.7.1.193) (PTS system N-acetylglucosamine-specific EIIB component); N-acetylglucosamine-specific phosphotransferase enzyme IIA compon…	648	N-acetylglucosamine PTS permease	P09323
glnS	1	b0680	ECK120000628	706093	707757	forward			Glutamine--tRNA ligase (EC 6.1.1.18) (Glutaminyl-tRNA synthetase) (GlnRS)	554	glutamine-tRNA ligase	P00962
chiP	1	b0681	ECK120000383	708334	709740	forward			Chitoporin (ChiP-III)	468	chitobiose outer membrane channel	P75733
ybfN	1	b0682	ECK120002973	709790	710116	forward			Uncharacterized lipoprotein ChiQ	108	uncharacterized lipoprotein YbfN	P75734
fur	1	b0683	ECK120000352	710200	710646	reverse			Ferric uptake regulation protein (Ferric uptake regulator)	148	Fur transcriptional dual regulator	P0A9A9
uof	11	b4637	ECK120002318	710639	710725	reverse			fur leader peptide	28	RyhB-regulated <i>fur</i> leader peptide	A8DYP9
fldA	1	b0684	ECK120029856	710935	711465	reverse			Flavodoxin 1	176	flavodoxin 1	P61949
ybfE	1	b0685	ECK120000312	711605	711898	reverse			Uncharacterized protein YbfE	97	LexA-regulated protein	P0AAU7
ybfF	1	b0686	ECK120001709	712038	712802	reverse			Esterase YbfF (EC 3.1.-.-)	254	esterase	P75736
seqA	1	b0687	ECK120001710	712987	713532	forward			Negative modulator of initiation of replication	181	SeqA, negative modulator of initiation of replication	P0AFY8
pgm	1	b0688	ECK120002086	713558	715198	forward			Phosphoglucomutase (PGM) (EC 5.4.2.2) (Glucose phosphomutase)	546	phosphoglucomutase	P36938
ybfP	9	b0689	ECK120001711	715412	715906	forward			Uncharacterized lipoprotein YbfP	164	putative protein	P75737
ybfG	1		ECK120002975	715947	716357	reverse	Split gene (partner ybfH)	Ecogene: Pseudogene reconstruction, DUF2625 family (216 aa) (ybfG+ybfH)	Putative uncharacterized protein YbfG	136	putative protein	P37003
ybfH	Split gene		ECK120001475	716388	716597	reverse	Split gene (partner ybfG)			69	putative protein
potE	1	b0692	ECK120001712	716946	718265	reverse			Putrescine transporter PotE (Putrescine-proton symporter / putrescine-ornithine antiporter)	439	putrescine:H<sup>+</sup> symporter / putrescine:ornithine antiporter PotE	P0AAF1
speF	1	b0693	ECK120000953	718262	720460	reverse			Inducible ornithine decarboxylase (EC 4.1.1.17)	732	ornithine decarboxylase, degradative	P24169
ybfK	9	b4590	ECK120000115	720583	720840	forward			Uncharacterized protein YbfK	85	hypothetical protein	P46121
kdpE	1	b0694	ECK120030070	721056	721733	reverse			KDP operon transcriptional regulatory protein KdpE	225	KdpE transcriptional activator	P21866
kdpD	1	b0695	ECK120000510	721730	724414	reverse			Sensor protein KdpD (EC 2.7.13.3)	894	KdpD	P21865
kdpC	1	b0696	ECK120000509	724407	724979	reverse			Potassium-transporting ATPase KdpC subunit (ATP phosphohydrolase [potassium-transporting] C chain) (Potassium-binding and translocating subunit C) (Potassium-translocating ATPase C chain)	190	K<sup>+</sup> transporting ATPase - KdpC subunit	P03961
kdpB	1	b0697	ECK120000508	724988	727036	reverse			Potassium-transporting ATPase ATP-binding subunit (EC 3.6.3.12) (ATP phosphohydrolase [potassium-transporting] B chain) (Potassium-binding and translocating subunit B) (Potassium-translocating ATPase B chain)	682	K<sup>+</sup> transporting ATPase - ATP binding subunit	P03960
kdpA	1	b0698	ECK120000506	727059	728732	reverse			Potassium-transporting ATPase potassium-binding subunit (ATP phosphohydrolase [potassium-transporting] A chain) (Potassium-binding and translocating subunit A) (Potassium-translocating ATPase A chain)	557	K<sup>+</sup> transporting ATPase - K<sup>+</sup> channel forming subunit	P03959
kdpF	No age assigned	b4513	ECK120002976	728732	728821	reverse			Potassium-transporting ATPase KdpF subunit (ATP phosphohydrolase [potassium-transporting] F chain) (Potassium-binding and translocating subunit F) (Potassium-translocating ATPase F chain)	29	K<sup>+</sup> transporting ATPase - KdpF subunit	P36937
ybfA	2	b0699	ECK120016291	729134	729340	forward			Uncharacterized protein YbfA	68	putative protein	P0AAU2
rhsC	1	b0700	ECK120000839	729583	733776	forward			Protein RhsC	1397	RhsC protein in rhs element	P16918
ybfB	1	b0702	ECK120001476	733776	734102	forward			Uncharacterized protein YbfB	108	predicted inner membrane protein	P0AAU5
ybfO	1		ECK120003108	734220	735653	forward			Putative uncharacterized protein YbfO	477	conserved protein, rhs-like	P77779
ybfC	9	b0704	ECK120001477	735650	736219	forward			Uncharacterized protein YbfC	189	putative protein	P28915
ybfQ	1	b4514	ECK120000168	736445	736699	forward			Putative defective transposase YbfQ	84	predicted transposase	Q2EEQ8
ybfL	1	b0705	ECK120016292	736900	737961	forward		Uniprot: erroneous termination at position 18	Putative protein YbfL (H repeat-associated protein in rhsC-phrB intergenic region) (ORF-H2)	353	predicted transposase; receptor protein	P75741
ybfD	1	b0706	ECK120002977	738092	738853	forward			H repeat-associated putative transposase YbfD (ORF-H3)	253	putative DNA ligase	P28916
ybgA	1	b0707	ECK120001478	739001	739510	forward			Uncharacterized protein YbgA (ORF169) (TKP)	169	conserved protein	P24252
phr	1	b0708	ECK120001094	739507	740925	forward			Deoxyribodipyrimidine photo-lyase (EC 4.1.99.3) (DNA photolyase) (Photoreactivating enzyme)	472	deoxyribodipyrimidine photolyase (photoreactivation)	P00914
dtpD	1	b0709	ECK120000727	741075	742556	reverse			Dipeptide permease D	493	dipeptide:H<sup>+</sup> symporter DtpD	P75742
ybgI	1	b0710	ECK120002978	742827	743570	forward			GTP cyclohydrolase 1 type 2 homolog (Radiation resistance protein YbgI)	247	conserved metal-binding protein	P0AFP6
ybgJ	1	b0711	ECK120002979	743593	744249	forward			Uncharacterized protein YbgJ	218	predicted enzyme subunit	P0AAV4
ybgK	1	b0712	ECK120002980	744243	745175	forward			Uncharacterized protein YbgK	310	predicted enzyme subunit	P75745
ybgL	1	b0713	ECK120002981	745165	745899	forward			UPF0271 protein YbgL	244	predicted lactam utilization protein	P75746
nei	1	b0714	ECK120002982	745935	746726	forward			Endonuclease 8 (DNA glycosylase/AP lyase Nei) (EC 3.2.2.-) (EC 4.2.99.18) (DNA-(apurinic or apyrimidinic site) lyase Nei) (Endonuclease VIII)	263	endonuclease VIII	P50465
abrB	1	b0715	ECK120002983	746723	747769	reverse			Putative regulator AbrB (AidB regulator)	348	predicted regulator	P75747
ybgO	1	b0716	ECK120002984	747921	748982	reverse			Uncharacterized protein YbgO	353	predicted fimbrial-like adhesin protein	P75748
ybgP	1	b0717	ECK120002985	748979	749707	reverse			Uncharacterized fimbrial chaperone YbgP	242	putative fimbrial chaperone	P75749
ybgQ	1	b0718	ECK120002986	749722	752169	reverse			Uncharacterized outer membrane usher protein YbgQ	815	predicted outer membrane usher protein	P75750
ybgD	1	b0719	ECK120002987	752229	752795	reverse			Uncharacterized fimbrial-like protein YbgD	188	predicted fimbrial-like adhesin protein	P37909	yes
gltA	1	b0720	ECK120002227	753185	754468	reverse			Citrate synthase (EC 2.3.3.16)	427	citrate synthase	P0ABH7
sdhC	1	b0721	ECK120000395	755177	755566	forward			Succinate dehydrogenase cytochrome b556 subunit (Cytochrome b-556)	129	succinate:quinone oxidoreductase, membrane protein SdhC	P69054
sdhD	1	b0722	ECK120000922	755560	755907	forward			Succinate dehydrogenase hydrophobic membrane anchor subunit	115	succinate:quinone oxidoreductase, membrane protein SdhD	P0AC44
sdhA	1	b0723	ECK120000923	755907	757673	forward			Succinate dehydrogenase flavoprotein subunit (EC 1.3.5.1)	588	succinate:quinone oxidoreductase, FAD binding protein	P0AC41
sdhB	1	b0724	ECK120000920	757689	758405	forward			Succinate dehydrogenase iron-sulfur subunit (EC 1.3.5.1)	238	succinate:quinone oxidoreductase, iron-sulfur cluster binding protein	P07014
sucA	1	b0726	ECK120002988	758706	761507	forward			2-oxoglutarate dehydrogenase E1 component (EC 1.2.4.2) (Alpha-ketoglutarate dehydrogenase)	933	subunit of E1(0) component of 2-oxoglutarate dehydrogenase	P0AFG3
sucB	1	b0727	ECK120000968	761522	762739	forward			Dihydrolipoyllysine-residue succinyltransferase component of 2-oxoglutarate dehydrogenase complex (EC 2.3.1.61) (2-oxoglutarate dehydrogenase complex component E2) (OGDC-E2) (Dihydrolipoamide succinyltransferase component of 2-oxoglutarate dehydrogenase complex)	405	dihydrolipoyltranssuccinylase	P0AFG6
sucC	1	b0728	ECK120000969	763014	764180	forward			Succinate--CoA ligase [ADP-forming] subunit beta (EC 6.2.1.5) (Succinyl-CoA synthetase subunit beta) (SCS-beta)	388	succinyl-CoA synthetase, &beta; subunit	P0A836
sucD	1	b0729	ECK120000970	764180	765049	forward			Succinate--CoA ligase [ADP-forming] subunit alpha (EC 6.2.1.5) (Succinyl-CoA synthetase subunit alpha) (SCS-alpha)	289	succinyl-CoA synthetase, &alpha; subunit	P0AGE9
mngR	1	b0730	ECK120000971	765153	765875	reverse			Mannosyl-D-glycerate transport/metabolism system repressor MngR (Fatty acyl-responsive regulator) (Protein P30)	240	MngR DNA-binding transcriptional repressor	P13669
mngA	1	b0731	ECK120001095	765984	767960	forward			PTS system 2-O-alpha-mannosyl-D-glycerate-specific EIIABC component (2-O-alpha-mannosyl-D-glycerate-specific phosphotransferase enzyme MngA) (Protein-Npi-phosphohistidine--2-O-alpha-mannosyl-D-glycerate phosphotransferase) [Includes: 2-O-alpha-mannosyl-D-glycerate-specific phosphotransferase enzyme IIA component (PTS system EIIA component); 2-O-alpha-mannosyl-D-glycerate-specific phosphotransfera…	658	2-<i>O</i>-&alpha;-mannosyl-D-glycerate PTS permease	P54745
mngB	1	b0732	ECK120002432	767978	770611	forward			Mannosylglycerate hydrolase (EC 3.2.1.170) (2-O-(6-phospho-mannosyl)-D-glycerate hydrolase) (Alpha-mannosidase mngB)	877	&alpha;-mannosidase	P54746
cydA	1	b0733	ECK120002433	771458	773026	forward			Cytochrome bd-I ubiquinol oxidase subunit 1 (EC 1.10.3.14) (Cytochrome bd-I oxidase subunit I) (Cytochrome d ubiquinol oxidase subunit I)	522	cytochrome <i>bd</i>-I terminal oxidase subunit I	P0ABJ9
cydB	1	b0734	ECK120000169	773042	774181	forward			Cytochrome bd-I ubiquinol oxidase subunit 2 (EC 1.10.3.14) (Cytochrome bd-I oxidase subunit II) (Cytochrome d ubiquinol oxidase subunit II)	379	cytochrome <i>bd</i>-I terminal oxidase subunit II	P0ABK2
cydX	5	b4515	ECK120003107	774196	774309	forward			Cytochrome bd-I ubiquinol oxidase subunit X (EC 1.10.3.14) (Cytochrome bd-I oxidase subunit X) (Cytochrome d ubiquinol oxidase subunit X)	37	cytochrome <i>bd</i>-I terminal oxidase - CydX subunit	P56100
ybgE	2	b0735	ECK120016293	774309	774602	forward			Uncharacterized protein YbgE	97	conserved inner membrane protein	P0AAV0
ybgC	1	b0736	ECK120002258	774752	775156	forward			Acyl-CoA thioester hydrolase YbgC (Acyl-CoA thioesterase) (EC 3.1.2.-)	134	esterase/thioesterase	P0A8Z3
tolQ	1	b0737	ECK120001096	775153	775845	forward			Tol-Pal system protein TolQ	230	TolQ - inner membrane protein of the Tol-Pal system	P0ABU9
tolR	1	b0738	ECK120000999	775849	776277	forward			Tol-Pal system protein TolR	142	TolR - inner membrane protein of the Tol-Pal system	P0ABV6
tolA	1	b0739	ECK120001000	776342	777607	forward			Tol-Pal system protein TolA	421	TolA - inner membrane protein of the Tol-Pal system	P19934
tolB	1	b0740	ECK120000996	777740	779032	forward			Tol-Pal system protein TolB	430	TolB - periplasmic protein of the Tol-Pal system	P0A855
pal	1	b0741	ECK120000997	779067	779588	forward			Peptidoglycan-associated lipoprotein (PAL) (Tol-Pal system lipoprotein Pal)	173	Pal - outer membrane lipoprotein of the Tol-Pal system	P0A912
cpoB	1	b0742	ECK120000677	779598	780389	forward			Cell division coordinator CpoB	263	periplasmic protein that coordinates peptidoglycan synthesis and outer membrane constriction during cell division	P45955
nadA	1	b0750	ECK120002992	782085	783128	forward			Quinolinate synthase A (EC 2.5.1.72)	347	quinolinate synthase	P11458
pnuC	1	b0751	ECK120000623	783166	783885	forward			Nicotinamide riboside transporter PnuC	239	nicotinamide riboside transporter	P0AFK2
zitB	1	b0752	ECK120001643	783882	784823	reverse			Zinc transporter ZitB	313	Zn<sup>2+</sup>/Cd<sup>2+</sup>/Ni<sup>2+</sup>/Cu<sup>2+</sup> exporter	P75757
ybgS	1	b0753	ECK120002993	784937	785317	reverse			Uncharacterized protein YbgS	126	conserved protein	P0AAV6
aroG	1	b0754	ECK120002994	785633	786685	forward			Phospho-2-dehydro-3-deoxyheptonate aldolase, Phe-sensitive (EC 2.5.1.54) (3-deoxy-D-arabino-heptulosonate 7-phosphate synthase) (DAHP synthase) (Phospho-2-keto-3-deoxyheptonate aldolase)	350	2-dehydro-3-deoxyphosphoheptonate aldolase	P0AB91
gpmA	1	b0755	ECK120000075	786843	787595	reverse			2,3-bisphosphoglycerate-dependent phosphoglycerate mutase (BPG-dependent PGAM) (PGAM) (Phosphoglyceromutase) (dPGM) (EC 5.4.2.11)	250	2,3-bisphosphoglycerate-dependent phosphoglycerate mutase	P62707
galM	1	b0756	ECK120001642	787797	788837	reverse			Aldose 1-epimerase (EC 5.1.3.3) (Galactose mutarotase) (Type-1 mutarotase)	346	galactose-1-epimerase	P0A9C3
galK	1	b0757	ECK120001641	788831	789979	reverse			Galactokinase (EC 2.7.1.6) (Galactose kinase)	382	galactokinase	P0A6T3
galT	1	b0758	ECK120000356	789983	791029	reverse			Galactose-1-phosphate uridylyltransferase (Gal-1-P uridylyltransferase) (EC 2.7.7.12) (UDP-glucose--hexose-1-phosphate uridylyltransferase)	348	galactose-1-phosphate uridylyltransferase	P09148
galE	1	b0759	ECK120000359	791039	792055	reverse			UDP-glucose 4-epimerase (EC 5.1.3.2) (Galactowaldenase) (UDP-galactose 4-epimerase)	338	UDP-glucose 4-epimerase	P09147
modF	1	b0760	ECK120000355	792316	793788	reverse			Putative molybdenum transport ATP-binding protein ModF (Photorepair protein PhrA)	490	putative transport protein, ABC superfamily	P31060
modE	1	b0761	ECK120001620	793856	794644	reverse			Transcriptional regulator ModE	262	ModE transcriptional dual regulator	P0A9G8
acrZ	2	b0762	ECK120002995	794773	794922	forward			Multidrug efflux pump accessory protein AcrZ (AcrAB-TolC multidrug efflux pump accessory protein AcrZ) (Acridine resistance protein Z)	49	small membrane protein that interacts with the AcrAB-TolC multidrug efflux pump	P0AAW9
modA	1	b0763	ECK120002996	795089	795862	forward			Molybdate-binding protein ModA (Molybdate/tungstate-binding protein ModA)	257	molybdate ABC transporter - periplasmic binding protein	P37329
modB	1	b0764	ECK120002283	795862	796551	forward			Molybdenum transport system permease protein ModB	229	molybdate ABC transporter - membrane subunit	P0AF01
modC	1	b0765	ECK120000002	796554	797612	forward			Molybdenum import ATP-binding protein ModC (EC 3.6.3.29)	352	molybdate ABC transporter - ATP binding subunit	P09833
ybhA	1	b0766	ECK120000148	797613	798431	reverse			Pyridoxal phosphate phosphatase YbhA (PLP phosphatase) (EC 3.1.3.74)	272	pyridoxal phosphatase/fructose 1,6-bisphosphatase	P21829
pgl	1	b0767	ECK120001217	798586	799581	forward			6-phosphogluconolactonase (6-P-gluconolactonase) (Pgl) (EC 3.1.1.31)	331	6-phosphogluconolactonase	P52697
ybhD	1	b0768	ECK120002997	799622	800575	reverse			Uncharacterized HTH-type transcriptional regulator YbhD	317	putative DNA-binding transcriptional regulator	P52696
ybhH	1	b0769	ECK120002998	800759	801811	forward			Putative isomerase YbhH (EC 5.-.-.-)	350	conserved protein	P0AAV8
ybhI	1	b0770	ECK120002999	801887	803320	forward			Inner membrane protein YbhI	477	putative transport protein, divalent anion:Na+ symporter (DASS) family	P75763
ybhJ	1	b0771	ECK120003000	803503	805764	forward			Uncharacterized protein YbhJ	753	predicted hydratase	P75764
ybhC	1	b0772	ECK120003001	805998	807281	reverse			Putative acyl-CoA thioester hydrolase YbhC (EC 3.1.2.-)	427	outer membrane lipoprotein	P46130
ybhB	1	b0773	ECK120002414	807433	807909	reverse			UPF0098 protein YbhB	158	predicted kinase inhibitor	P12994
bioA	1	b0774	ECK120001216	807968	809257	reverse			Adenosylmethionine-8-amino-7-oxononanoate aminotransferase (EC 2.6.1.62) (7,8-diamino-pelargonic acid aminotransferase) (DAPA AT) (DAPA aminotransferase) (7,8-diaminononanoate synthase) (DANS) (Diaminopelargonic acid synthase)	429	adenosylmethionine-8-amino-7-oxononanoate aminotransferase	P12995
bioB	1	b0775	ECK120000113	809344	810384	forward			Biotin synthase (EC 2.8.1.6)	346	biotin synthase	P12996
bioF	1	b0776	ECK120000114	810381	811535	forward			8-amino-7-oxononanoate synthase (AONS) (EC 2.3.1.47) (7-keto-8-amino-pelargonic acid synthase) (7-KAP synthase) (KAPA synthase) (8-amino-7-ketopelargonate synthase)	384	8-amino-7-oxononanoate synthase	P12998
bioC	1	b0777	ECK120000117	811522	812277	forward			Malonyl-[acyl-carrier protein] O-methyltransferase (Malonyl-ACP O-methyltransferase) (EC 2.1.1.197) (Biotin synthesis protein BioC)	251	malonyl-[acp] methyltransferase	P12999
bioD	1	b0778	ECK120000116	812270	812947	forward			ATP-dependent dethiobiotin synthetase BioD 1 (EC 6.3.3.3) (DTB synthetase 1) (DTBS 1) (Dethiobiotin synthase)	225	dethiobiotin synthetase	P13000
uvrB	1	b0779	ECK120030071	813526	815547	forward			UvrABC system protein B (Protein UvrB) (Excinuclease ABC subunit B)	673	DNA repair; excision nuclease subunit B	P0A8F8
ybhK	1	b0780	ECK120001051	815739	816647	reverse			Putative gluconeogenesis factor	302	predicted transferase with NAD(P)-binding Rossmann-fold domain	P75767
moaA	1	b0781	ECK120003002	817044	818033	forward			GTP 3',8-cyclase (EC 4.1.99.22) (Molybdenum cofactor biosynthesis protein A)	329	GTP 3',8'-cyclase	P30745
moaB	1	b0782	ECK120001543	818055	818567	forward			Molybdenum cofactor biosynthesis protein B	170	MoaB protein	P0AEZ9
moaC	1	b0783	ECK120001544	818570	819055	forward			Cyclic pyranopterin monophosphate synthase (EC 4.6.1.17) (Molybdenum cofactor biosynthesis protein C)	161	cyclic pyranopterin monophosphate synthase	P0A738
moaD	1	b0784	ECK120001609	819048	819293	forward			Molybdopterin synthase sulfur carrier subunit (MPT synthase subunit 1) (Molybdenum cofactor biosynthesis protein D) (Molybdopterin-converting factor small subunit) (Molybdopterin-converting factor subunit 1) (Sulfur carrier protein MoaD)	81	molybdopterin synthase small subunit	P30748
moaE	1	b0785	ECK120001545	819295	819747	forward			Molybdopterin synthase catalytic subunit (EC 2.8.1.12) (MPT synthase subunit 2) (Molybdenum cofactor biosynthesis protein E) (Molybdopterin-converting factor large subunit) (Molybdopterin-converting factor subunit 2)	150	molybdopterin synthase large subunit	P30749
ybhL	1	b0786	ECK120001546	819884	820588	forward			Inner membrane protein YbhL	234	inner membrane protein	P0AAC4
ybhM	1	b0787	ECK120003003	820793	821506	forward			Uncharacterized protein YbhM	237	conserved inner membrane protein	P75769
ybhN	1	b0788	ECK120003004	821542	822498	reverse			Inner membrane protein YbhN	318	conserved inner membrane protein	P75770
clsB	1	b0789	ECK120003005	822498	823739	reverse			Cardiolipin synthase B (CL synthase) (EC 2.7.8.-)	413	cardiolipin synthase 2	P0AA84
ybhP	1	b0790	ECK120003006	823736	824497	reverse			Uncharacterized protein YbhP	253	predicted DNase	P0AAW1
ybhQ	1	b0791	ECK120003007	824630	825040	forward			Inner membrane protein YbhQ	136	predicted inner membrane protein	P0AAW5
ybhR	1	b0792	ECK120003008	825002	826108	reverse			Probable multidrug ABC transporter permease YbhR	368	multidrug ABC exporter membrane subunit	P0AFP9
ybhS	1	b0793	ECK120003009	826119	827252	reverse			Probable multidrug ABC transporter permease YbhS	377	multidrug ABC exporter membrane subunit	P0AFQ2
ybhF	1	b0794	ECK120003010	827245	828981	reverse			Probable multidrug ABC transporter ATP-binding protein YbhF	578	multidrug ABC exporter ATP binding subunit	P0A9U1
ybhG	1	b0795	ECK120003011	828974	829972	reverse			UPF0194 membrane protein YbhG	332	predicted membrane fusion protein	P75777
cecR	1	b0796	ECK120003012	829972	830643	reverse			HTH-type transcriptional dual regulator CecR (Regulator of cefoperazone and chloramphenicol sensitivity)	223	CecR DNA-binding transcriptional dual regulator	P0ACU0
rhlE	1	b0797	ECK120002268	830872	832236	forward			ATP-dependent RNA helicase RhlE (EC 3.6.4.13)	454	ATP-dependent RNA helicase	P25888
ybiA	1	b0798	ECK120001213	832468	832950	reverse			N-glycosidase YbiA (EC 3.2.2.-) (Riboflavin biosynthesis intermediates N-glycosidase)	160	conserved protein	P30176
dinG	1	b0799	ECK120001531	833070	835220	forward			ATP-dependent DNA helicase DinG (EC 3.6.4.12)	716	ATP-dependent helicase	P27296
ybiB	1	b0800	ECK120001326	835248	836210	forward			Uncharacterized protein YbiB	320	nonspecific DNA binding protein	P30177
ybiC	1	b0801	ECK120001532	836351	837436	forward			Hydroxycarboxylate dehydrogenase B (EC 1.1.1.-) (2-oxoglutarate reductase) (Hydroxyphenylpyruvate reductase) (EC 1.1.1.237) (Phenylpyruvate reductase)	361	predicted dehydrogenase	P30178
ybiJ	1	b0802	ECK120001533	837665	837925	reverse			Uncharacterized protein YbiJ	86	uncharacterized protein YbiJ	P0AAX3
ybiI	1	b0803	ECK120002280	838190	838456	reverse			Uncharacterized protein YbiI	88	conserved protein	P41039
ybiX	1	b0804	ECK120002279	838530	839207	reverse			PKHD-type hydroxylase YbiX (EC 1.14.11.-)	225	conserved protein	P75779
fiu	1	b0805	ECK120003013	839249	841531	reverse			Catecholate siderophore receptor Fiu (Ferric iron uptake protein) (TonB-dependent receptor Fiu)	760	putative outer membrane receptor for iron transport	P75780
mcbA	1	b0806	ECK120003014	841796	842056	reverse			Uncharacterized protein McbA (MqsR-controlled colanic acid and biofilm protein A)	86	protein involved in colanic acid production	P0AAX6
rlmF	1	b0807	ECK120003015	842332	843258	forward			Ribosomal RNA large subunit methyltransferase F (EC 2.1.1.181) (23S rRNA mA1618 methyltransferase) (rRNA adenine N-6-methyltransferase)	308	23S rRNA m<sup>6</sup>A1618 methyltransferase	P75782
ybiO	1	b0808	ECK120003016	843255	845480	reverse			Moderate conductance mechanosensitive channel YbiO	741	mechanosensitive channel YbiO	P75783
glnQ	1	b0809	ECK120003017	845741	846463	reverse			Glutamine transport ATP-binding protein GlnQ	240	L-glutamine ABC transporter - ATP binding subunit	P10346
glnP	1	b0810	ECK120000382	846460	847119	reverse			Glutamine transport system permease protein GlnP	219	L-glutamine ABC transporter - membrane subunit	P0AEQ6
glnH	1	b0811	ECK120000381	847258	848004	reverse			Glutamine-binding periplasmic protein (GlnBP)	248	L-glutamine ABC transporter - periplasmic binding protein	P0AEQ3
dps	1	b0812	ECK120000379	848408	848911	reverse			DNA protection during starvation protein (EC 1.16.-.-)	167	stationary phase nucleoid protein that sequesters iron and protects DNA from damage	P0ABT2
rhtA	1	b0813	ECK120001381	849210	850097	reverse			Threonine/homoserine exporter RhtA	295	threonine / homoserine exporter	P0AA67
ompX	1	b0814	ECK120002036	850450	850965	forward			Outer membrane protein X	171	outer membrane protein X	P0A917
opgE	1	b0815	ECK120002021	851014	852597	reverse			Phosphoethanolamine transferase OpgE (EC 2.7.-.-)	527	phosphoethanolamine transferase	P75785
mntS	5	b4705	ECK120003901	852869	852997	reverse			Small protein MntS	42	small protein MntS	P0DKB3
mntR	1	b0817	ECK125140755	853183	853650	forward			Transcriptional regulator MntR (Manganese transport regulator)	155	MntR transcriptional dual regulator	P0A9F1
ybiR	1	b0818	ECK120003020	853647	854765	forward			Inner membrane protein YbiR	372	putative transport protein, ion transporter (IT) superfamily	P75788
ldtB	1	b0819	ECK120003021	854824	855744	reverse			Probable L,D-transpeptidase YbiS (EC 2.-.-.-)	306	L,D-transpeptidase YbiS	P0AAX8
ybiT	1	b0820	ECK120003022	855963	857555	forward			Uncharacterized ABC transporter ATP-binding protein YbiT	530	putative transport protein, ABC superfamily - ATP binding component	P0A9U3
ybiU	1	b0821	ECK120003023	857796	859061	reverse			Uncharacterized protein YbiU	421	putative protein	P75791
ybiV	1	b0822	ECK120003024	859213	860028	reverse			Sugar phosphatase YbiV (EC 3.1.3.23)	271	sugar phosphatase	P75792
ybiW	1	b0823	ECK120003025	860174	862606	reverse			Putative formate acetyltransferase 3 (EC 2.3.1.54) (Pyruvate formate-lyase 3)	810	predicted pyruvate formate lyase	P75793
ybiY	1	b0824	ECK120003026	862612	863511	reverse			Putative pyruvate formate-lyase 3-activating enzyme (EC 1.97.1.4) (Formate-C-acetyltransferase-activating enzyme 3) (PFL-activating enzyme 3)	299	predicted pyruvate formate lyase activating enzyme	P75794
fsaA	1	b0825	ECK120003027	863642	864304	forward			Fructose-6-phosphate aldolase 1 (EC 4.1.2.-) (Fructose-6-phosphate aldolase A) (FSAA)	220	fructose 6-phosphate aldolase 1	P78055
moeB	1	b0826	ECK120003028	864380	865129	reverse			Molybdopterin-synthase adenylyltransferase (EC 2.7.7.80) (MoaD protein adenylase) (Molybdopterin-converting factor subunit 1 adenylase) (Sulfur carrier protein MoaD adenylyltransferase)	249	molybdopterin-synthase adenylyltransferase	P12282
moeA	1	b0827	ECK120000150	865129	866364	reverse			Molybdopterin molybdenumtransferase (MPT Mo-transferase) (EC 2.10.1.1)	411	molybdopterin molybdenumtransferase	P12281
iaaA	1	b0828	ECK120000149	866568	867533	forward			Isoaspartyl peptidase (EC 3.4.19.5) (Beta-aspartyl-peptidase) (EcAIII) (Isoaspartyl dipeptidase) [Cleaved into: Isoaspartyl peptidase subunit alpha; Isoaspartyl peptidase subunit beta]	321	IaaA	P37595
gsiA	1	b0829	ECK120002269	867520	869391	forward			Glutathione import ATP-binding protein GsiA (EC 3.6.3.-)	623	glutathione ABC transporter - ATP binding subunit	P75796
gsiB	1	b0830	ECK120003029	869411	870949	forward			Glutathione-binding protein GsiB	512	glutathione ABC transporter - periplasmic binding protein	P75797
gsiC	1	b0831	ECK120003030	870967	871887	forward			Glutathione transport system permease protein GsiC	306	glutathione ABC transporter - membrane subunit	P75798
gsiD	1	b0832	ECK120003031	871890	872801	forward			Glutathione transport system permease protein GsiD	303	glutathione ABC transporter - membrane subunit	P75799
pdeI	1	b0833	ECK120003032	872979	875327	forward			Probable cyclic di-GMP phosphodiesterase PdeI (EC 3.1.4.52)	782	predicted c-di-GMP-specific phosphodiesterase	P75800
dgcI	1	b0834	ECK120003033	875335	876663	forward			Probable diguanylate cyclase DgcI (DGC) (EC 2.7.7.65) (Putative lipoprotein DgcI)	442	predicted diguanylate cyclase	P75801	yes
rimO	1	b0835	ECK120003034	876710	878035	reverse			Ribosomal protein S12 methylthiotransferase RimO (S12 MTTase) (S12 methylthiotransferase) (EC 2.8.4.4) (Ribosomal protein S12 (aspartate(89)-C(3))-methylthiotransferase) (Ribosome maturation factor RimO)	441	ribosomal protein S12 D88 methylthiotransferase	P0AEI4
bssR	1	b0836	ECK120003035	878248	878631	forward			Biofilm regulator BssR	127	regulator of biofilm formation	P0AAY1	yes
yliI	1	b0837	ECK120003036	878742	879857	forward			Aldose sugar dehydrogenase YliI (Asd) (EC 1.1.5.-) (Soluble aldose sugar dehydrogenase YliI)	371	aldose sugar dehydrogenase	P75804
gstB	1	b0838	ECK120003037	879854	880480	reverse			Glutathione S-transferase GstB (EC 2.5.1.18)	208	glutathione S-transferase B	P0ACA7
dacC	1	b0839	ECK120003038	880727	881929	forward			D-alanyl-D-alanine carboxypeptidase DacC (DD-carboxypeptidase) (DD-peptidase) (EC 3.4.16.4) (Penicillin-binding protein 6) (PBP-6)	400	penicillin-binding protein 6	P08506
deoR	1	b0840	ECK120000197	881976	882734	reverse			Deoxyribose operon repressor	252	DeoR DNA-binding transcriptional repressor	P0ACK5
ybjG	1	b0841	ECK120000217	882792	883388	reverse			Putative undecaprenyl-diphosphatase YbjG (EC 3.6.1.27) (Undecaprenyl pyrophosphate phosphatase)	198	undecaprenyl pyrophosphate phosphatase	P75806
mdfA	1	b0842	ECK120003039	883673	884905	forward			Multidrug transporter MdfA (Chloramphenicol resistance pump Cmr)	410	multidrug efflux pump MdfA (multifunctional)	P0AEY8
ybjH	9	b0843	ECK120003040	884946	885230	reverse			Uncharacterized protein YbjH	94	putative protein	P0AAY4
ybjI	1	b0844	ECK120003041	885316	886131	reverse			5-amino-6-(5-phospho-D-ribitylamino)uracil phosphatase YbjI (EC 3.1.3.104)	271	5-amino-6-(5-phospho-D-ribitylamino)uracil phosphatase	P75809
ybjJ	1	b0845	ECK120003042	886131	887339	reverse			Inner membrane protein YbjJ	402	inner membrane protein YbjJ	P75810
rcdA	1	b0846	ECK120003044	887423	887959	forward			HTH-type transcriptional regulator RcdA (Regulator of csgD)	178	RcdA DNA-binding transcriptional regulator	P75811
ybjL	1	b0847	ECK120002591	888134	889819	reverse			Putative transport protein YbjL	561	inner membrane protein YbjL	P60869
ybjM	5	b0848	ECK120003045	890089	890466	forward			Inner membrane protein YbjM	125	predicted inner membrane protein	P64439
grxA	1	b0849	ECK120003046	890496	890753	reverse			Glutaredoxin 1 (Grx1)	85	reduced glutaredoxin 1	P68688
ybjC	2	b0850	ECK120000410	890913	891200	forward			Uncharacterized protein YbjC	95	predicted inner membrane protein	P46119
nfsA	1	b0851	ECK120002395	891184	891906	forward			Oxygen-insensitive NADPH nitroreductase (EC 1.-.-.-) (Modulator of drug activity A)	240	NADPH nitroreductase NfsA	P17117
rimK	1	b0852	ECK120001236	891967	892869	forward			Ribosomal protein S6--L-glutamate ligase (EC 6.3.2.-) (Polyglutamate synthase) (Ribosomal protein S6 modification protein)	300	ribosomal protein S6 modification protein	P0C0U4
ybjN	1	b0853	ECK120000843	892957	893433	forward			Uncharacterized protein YbjN	158	predicted oxidoreductase	P0AAY6	yes
potF	1	b0854	ECK120003047	893784	894896	forward			Putrescine-binding periplasmic protein	370	putrescine ABC transporter - periplasmic binding protein	P31133
potG	1	b0855	ECK120001577	894991	896124	forward			Putrescine transport ATP-binding protein PotG	377	putrescine ABC transporter - ATP binding subunit	P31134
potH	1	b0856	ECK120001578	896134	897087	forward			Putrescine transport system permease protein PotH	317	putrescine ABC transporter - membrane subunit	P31135
potI	1	b0857	ECK120001579	897084	897929	forward			Putrescine transport system permease protein PotI	281	putrescine ABC transporter - membrane subunit	P0AFL1
ybjO	1	b0858	ECK120001580	897989	898477	forward			Inner membrane protein YbjO	162	predicted inner membrane protein	P0AAZ0
rlmC	1	b0859	ECK120003048	898518	899645	forward			23S rRNA (uracil(747)-C(5))-methyltransferase RlmC (EC 2.1.1.189) (23S rRNA(m5U747)-methyltransferase)	375	23S rRNA m<sup>5</sup>U747 methyltransferase	P75817
artJ	1	b0860	ECK120003049	899844	900575	reverse			ABC transporter arginine-binding protein 1	243	L-arginine ABC transporter - periplasmic binding protein	P30860
artM	1	b0861	ECK120001576	900866	901534	reverse			Arginine ABC transporter permease protein ArtM	222	L-arginine ABC transporter - membrane subunit	P0AE30
artQ	1	b0862	ECK120001575	901534	902250	reverse			Arginine ABC transporter permease protein ArtQ	238	L-arginine ABC transporter - membrane subunit	P0AE34
artI	1	b0863	ECK120001574	902257	902988	reverse			Putative ABC transporter arginine-binding protein 2	243	periplasmic binding protein ArtI	P30859
artP	1	b0864	ECK120001573	903006	903734	reverse			Arginine transport ATP-binding protein ArtP (EC 3.6.3.-)	242	L-arginine ABC transporter - ATP binding subunit	P0AAF6
ybjP	1	b0865	ECK120001572	903952	904467	reverse			Uncharacterized lipoprotein YbjP	171	predicted lipoprotein	P75818
ybjQ	1	b0866	ECK120003050	904593	904916	forward			UPF0145 protein YbjQ	107	conserved protein	P0A8C1
amiD	1	b0867	ECK120003051	904913	905743	forward			N-acetylmuramoyl-L-alanine amidase AmiD (EC 3.5.1.28)	276	anhydro-N-acetylmuramoyl-L-alanine amidase	P75820
ybjS	1	b0868	ECK120003052	905740	906753	reverse			Uncharacterized protein YbjS	337	predicted NAD(P)H-binding oxidoreductase with NAD(P)-binding Rossmann-fold domain	P75821
ybjT	1	b0869	ECK120003053	906852	908282	reverse			Putative NAD(P)-binding protein YbjT	476	conserved protein with NAD(P)-binding Rossmann-fold domain	P75822
ltaE	1	b0870	ECK120003054	908293	909294	reverse			Low specificity L-threonine aldolase (Low specificity L-TA) (EC 4.1.2.48)	333	low-specificity L-threonine aldolase	P75823
poxB	1	b0871	ECK120003055	909331	911049	reverse			Pyruvate dehydrogenase [ubiquinone] (EC 1.2.5.1) (Pyruvate oxidase) (POX) [Cleaved into: Alpha-peptide]	572	pyruvate oxidase	P07003
hcr	1	b0872	ECK120000745	911182	912150	reverse			NADH oxidoreductase HCR (EC 1.-.-.-)	322	NADH oxidoreductase	P75824
hcp	1	b0873	ECK120003056	912162	913814	reverse			Hydroxylamine reductase (EC 1.7.99.1) (Hybrid-cluster protein) (HCP) (Prismane protein)	550	nitric oxide reductase	P75825
lysO	1	b0874	ECK120003057	913958	914857	reverse			Lysine exporter LysO (Lys outward permease)	299	L-lysine exporter	P75826
aqpZ	1	b0875	ECK120003058	915352	916047	reverse			Aquaporin Z (Bacterial nodulin-like intrinsic protein)	231	water channel AqpZ	P60844
ybjD	1	b0876	ECK120002435	916473	918131	forward			Uncharacterized protein YbjD	552	conserved protein with a nucleotide triphosphate hydrolase domain	P75828
ybjX	1	b0877	ECK120003059	918128	919120	reverse			Uncharacterized protein YbjX	330	conserved protein	P75829
macA	1	b0878	ECK120003060	919235	920350	forward			Macrolide export protein MacA	371	macrolide ABC exporter - membrane fusion protein	P75830
macB	1	b0879	ECK120003061	920347	922293	forward			Macrolide export ATP-binding/permease protein MacB (EC 3.6.3.-)	648	macrolide ABC exporter - ATP binding / membrane subunit	P75831
cspD	1	b0880	ECK120003062	922366	922590	reverse			Cold shock-like protein CspD (CSP-D)	74	DNA replication inhibitor	P0A968
clpS	1	b0881	ECK120001097	922913	923233	forward			ATP-dependent Clp protease adapter protein ClpS	106	specificity factor for ClpA-ClpP chaperone-protease complex	P0A8Q6
clpA	1	b0882	ECK120003063	923264	925540	forward			ATP-dependent Clp protease ATP-binding subunit ClpA	758	ClpA	P0ABH9
infA	1	b0884	ECK120002538	926225	926443	reverse			Translation initiation factor IF-1	72	protein chain initiation factor IF-1	P69222
aat	1	b0885	ECK120000497	926728	927432	reverse			Leucyl/phenylalanyl-tRNA--protein transferase (EC 2.3.2.6) (L/F-transferase) (Leucyltransferase) (Phenyalanyltransferase)	234	leucyl, phenylalanyl-tRNA-protein transferase	P0A8P1
cydC	1	b0886	ECK120001098	927474	929195	reverse			ATP-binding/permease protein CydC	573	glutathione / L-cysteine exporter - CydC subunit	P23886
cydD	1	b0887	ECK120000010	929196	930962	reverse			ATP-binding/permease protein CydD	588	glutathione / L-cysteine exporter - CydD subunit	P29018
trxB	1	b0888	ECK120001371	931085	932050	reverse			Thioredoxin reductase (TRXR) (EC 1.8.1.9)	321	thioredoxin reductase	P0A9P4
lrp	1	b0889	ECK120001021	932595	933089	forward			Leucine-responsive regulatory protein	164	Lrp transcriptional dual regulator	P0ACJ0
ftsK	1	b0890	ECK120000540	933224	937213	forward			DNA translocase FtsK	1329	essential cell division protein FtsK	P46889
lolA	1	b0891	ECK120003064	937372	937983	forward			Outer-membrane lipoprotein carrier protein (P20)	203	periplasmic chaperone, effects translocation of lipoproteins from inner membrane to outer	P61316
rarA	1	b0892	ECK120003065	937994	939337	forward			Replication-associated recombination protein A	447	recombination factor	P0AAZ4
serS	1	b0893	ECK120002355	939428	940720	forward			Serine--tRNA ligase (EC 6.1.1.11) (Seryl-tRNA synthetase) (SerRS) (Seryl-tRNA(Ser/Sec) synthetase)	430	serine-tRNA ligase	P0A8L1
dmsA	1	b0894	ECK120000936	940959	943403	forward			Dimethyl sulfoxide reductase DmsA (DMSO reductase) (DMSOR) (Me2SO reductase) (EC 1.8.5.3)	814	dimethyl sulfoxide reductase, chain A	P18775
dmsB	1	b0895	ECK120000226	943414	944031	forward			Anaerobic dimethyl sulfoxide reductase chain B (DMSO reductase iron-sulfur subunit)	205	dimethyl sulfoxide reductase, chain B	P18776
dmsC	1	b0896	ECK120000227	944033	944896	forward			Anaerobic dimethyl sulfoxide reductase chain C (DMSO reductase anchor subunit)	287	dimethyl sulfoxide reductase, chain C	P18777
ycaC	1	b0897	ECK120000228	944931	945557	reverse			Probable hydrolase YcaC (EC 4.-.-.-)	208	predicted hydrolase	P21367
ycaD	1	b0898	ECK120001218	945871	947019	forward			Uncharacterized MFS-type transporter YcaD	382	putative transport protein, major facilitator superfamily (MFS)	P21503
ycaM	1	b0899	ECK120001219	947229	948659	forward			Inner membrane transporter YcaM	476	putative transport protein, amino acid-polyamine-organocation (APC) superfamily	P75835
ycaN	1	b0900	ECK120003066	948660	949568	reverse			Uncharacterized HTH-type transcriptional regulator YcaN	302	putative transcriptional regulator LYSR-type	P75836
ycaK	1	b0901	ECK120003067	949668	950258	forward			Uncharacterized NAD(P)H oxidoreductase YcaK (EC 1.6.99.-)	196	conserved protein	P43340
pflA	1	b0902	ECK120002361	950340	951080	reverse			Pyruvate formate-lyase 1-activating enzyme (EC 1.97.1.4) (Formate-C-acetyltransferase-activating enzyme 1) (PFL-activating enzyme 1)	246	pyruvate formate-lyase activating enzyme	P0A9N4
pflB	1	b0903	ECK120000025	951272	953554	reverse			Formate acetyltransferase 1 (EC 2.3.1.54) (Pyruvate formate-lyase 1)	760	pyruvate formate-lyase (inactive)	P09373
focA	1	b0904	ECK120000693	953609	954466	reverse			Probable formate transporter 1 (Formate channel 1)	285	formate channel FocA	P0AC23
ycaO	1	b0905	ECK120001233	954872	956632	reverse			Ribosomal protein S12 methylthiotransferase accessory factor YcaO	586	protein involved in &beta;-methylthiolation of ribosomal protein S12	P75838
ycaP	1	b0906	ECK120003068	956762	957454	forward			UPF0702 transmembrane protein YcaP	230	conserved inner membrane protein	P75839
serC	1	b0907	ECK120003069	957653	958741	forward			Phosphoserine aminotransferase (EC 2.6.1.52) (Phosphohydroxythreonine aminotransferase) (PSAT)	362		P23721
aroA	1	b0908	ECK120000935	958812	960095	forward			3-phosphoshikimate 1-carboxyvinyltransferase (EC 2.5.1.19) (5-enolpyruvylshikimate-3-phosphate synthase) (EPSP synthase) (EPSPS)	427	3-phosphoshikimate-1-carboxyvinyltransferase	P0A6D3
ycaL	1	b0909	ECK120000069	960264	961028	forward			Uncharacterized metalloprotease YcaL (EC 3.4.24.-)	254	predicted peptidase with chaperone function	P43674
cmk	1	b0910	ECK120003070	961201	961884	forward			Cytidylate kinase (CK) (EC 2.7.4.25) (Cytidine monophosphate kinase) (CMP kinase) (Protein MssA) (p25)	227	cytidylate kinase	P0A6I0
rpsA	1	b0911	ECK120001239	961995	963668	forward			30S ribosomal protein S1 (Bacteriophage Q beta RNA-directed RNA polymerase subunit I) (Small ribosomal subunit protein bS1)	557	30S ribosomal subunit protein S1	P0AG67
ihfB	1	b0912	ECK120000891	963828	964112	forward			Integration host factor subunit beta (IHF-beta)	94	integration host factor (IHF), &beta; subunit	P0A6Y1
ycaI	1	b0913	ECK120000434	964320	966584	forward			Uncharacterized protein YcaI	754	conserved inner membrane protein	P37443
msbA	1	b0914	ECK120002243	966621	968369	forward			Lipid A export ATP-binding/permease protein MsbA (EC 3.6.3.-)	582	ATP-binding lipopolysaccharide transport protein	P60752
lpxK	1	b0915	ECK120000606	968366	969352	forward			Tetraacyldisaccharide 4'-kinase (EC 2.7.1.130) (Lipid A 4'-kinase)	328	tetraacyldisaccharide 4'-kinase	P27300
ycaQ	1	b0916	ECK120001375	969389	970621	forward			Uncharacterized protein YcaQ	410	conserved protein	P75843
ycaR	1	b0917	ECK120003071	970673	970855	forward			UPF0434 protein YcaR	60	conserved protein	P0AAZ7
kdsB	1	b0918	ECK120003072	970852	971598	forward			3-deoxy-manno-octulosonate cytidylyltransferase (EC 2.7.7.38) (CMP-2-keto-3-deoxyoctulosonic acid synthase) (CKS) (CMP-KDO synthase)	248	3-deoxy-D-<i>manno</i>-octulosonate cytidylyltransferase	P04951
ycbJ	1	b0919	ECK120000512	971752	972645	forward			Uncharacterized protein YcbJ	297	conserved protein	P0AB03
elyC	1	b0920	ECK120003073	972622	973401	reverse			Envelope biogenesis factor ElyC (Elevated frequency of lysis)	259	inner membrane protein involved in peptidoglycan synthesis	P0AB01
cmoM	1	b0921	ECK120002062	973537	974322	forward			tRNA 5-carboxymethoxyuridine methyltransferase (EC 2.1.1.-) (cmo5U methyltransferase)	261	tRNA <b>cmo</b><sup>5</sup>U34 methyltransferase	P36566
mukF	1	b0922	ECK120002063	974319	975641	forward			Chromosome partition protein MukF (Protein KicB)	440	Ca<sup>2+</sup>-binding protein involved in chromosome partitioning	P60293
mukE	1	b0923	ECK120002061	975622	976326	forward			Chromosome partition protein MukE (Protein KicA)	234	protein involved in chromosome partitioning	P22524
mukB	1	b0924	ECK120001227	976326	980786	forward			Chromosome partition protein MukB (Structural maintenance of chromosome-related protein)	1486	cell division protein involved in chromosome partitioning	P22523
ldtD	1	b0925	ECK120000611	981047	982894	forward			Probable L,D-transpeptidase YcbB (EC 2.-.-.-)	615	L,D-transpeptidase LdtD	P22525
ycbK	1	b0926	ECK120001228	983075	983623	forward			Uncharacterized protein YcbK	182	conserved protein	P0AB06
gloC	1	b0927	ECK120003074	983650	984297	forward			Hydroxyacylglutathione hydrolase GloC (EC 3.1.2.6) (Accessory type II glyoxalase) (Glyoxalase II 2) (GlxII-2)	215	glyoxalase II	P75849
aspC	1	b0928	ECK120003075	984519	985709	reverse			Aspartate aminotransferase (AspAT) (EC 2.6.1.1) (Transaminase A)	396	aspartate aminotransferase, PLP-dependent	P00509
ompF	1	b0929	ECK120000092	985894	986982	reverse			Outer membrane protein F (Outer membrane protein 1A) (Outer membrane protein B) (Outer membrane protein IA) (Porin OmpF)	362	outer membrane porin F	P02931
asnS	1	b0930	ECK120000664	987585	988985	reverse			Asparagine--tRNA ligase (EC 6.1.1.22) (Asparaginyl-tRNA synthetase) (AsnRS)	466	asparagine-tRNA ligase	P0A8M0
pncB	1	b0931	ECK120000090	989154	990356	reverse			Nicotinate phosphoribosyltransferase (NAPRTase) (EC 6.3.4.21)	400	nicotinate phosphoribosyltransferase	P18133
pepN	1	b0932	ECK120000733	990622	993234	forward			Aminopeptidase N (EC 3.4.11.2) (Alpha-aminoacylpeptide hydrolase)	870	aminopeptidase N	P04825
ssuB	1	b0933	ECK120000688	993277	994044	reverse			Aliphatic sulfonates import ATP-binding protein SsuB (EC 3.6.3.-)	255	aliphatic sulfonate ABC transporter - ATP binding subunit	P0AAI1
ssuC	1	b0934	ECK120002226	994041	994832	reverse			Putative aliphatic sulfonates transport permease protein SsuC	263	aliphatic sulfonate ABC transporter - membrane subunit	P75851
ssuD	1	b0935	ECK120003076	994843	995988	reverse			Alkanesulfonate monooxygenase (EC 1.14.14.5) (FMNH2-dependent aliphatic sulfonate monooxygenase) (Sulfate starvation-induced protein 6) (SSI6)	381	alkanesulfonate monooxygenase, FMNH<sub>2</sub>-dependent	P80645
ssuA	1	b0936	ECK120003077	995985	996944	reverse			Putative aliphatic sulfonates-binding protein	319	aliphatic sulfonate ABC transporter - periplasmic binding protein	P75853
ssuE	1	b0937	ECK120003078	996937	997512	reverse			FMN reductase (NADPH) (EC 1.5.1.38) (FMN reductase) (Sulfate starvation-induced protein 4) (SSI4)	191	NADPH-dependent FMN reductase	P80644
elfA	1	b0938	ECK120003079	997868	998407	forward			Fimbrial subunit ElfA	179	fimbrial-like adhesin protein	P75855	yes
elfD	1	b0939	ECK120003080	998490	999191	forward			Probable fimbrial chaperone protein ElfD	233	predicted periplasmic pilin chaperone	P75856
elfC	1	b0940	ECK120003081	999216	1001816	forward			Probable outer membrane usher protein ElfC	866	predicted outer membrane usher protein	P75857
elfG	1	b0941	ECK120003082	1001807	1002877	forward			Uncharacterized fimbrial-like protein ElfG	356	predicted fimbrial-like adhesin protein	P75858	yes
ycbU	1	b0942	ECK120003083	1002889	1003431	forward			Uncharacterized fimbrial-like protein YcbU	180	predicted fimbrial-like adhesin protein	P75859	yes
ycbV	1	b0943	ECK120003084	1003439	1003954	forward			Uncharacterized fimbrial-like protein YcbV	171	predicted fimbrial-like adhesin protein	P75860	yes
ycbF	1	b0944	ECK120003085	1003947	1004657	forward			Uncharacterized fimbrial chaperone YcbF	236	predicted periplasmic pilin chaperone	P40876
pyrD	1	b0945	ECK120002260	1004768	1005778	forward			Dihydroorotate dehydrogenase (quinone) (EC 1.3.5.2) (DHOdehase) (DHOD) (DHODase) (Dihydroorotate oxidase)	336	dihydroorotate dehydrogenase, type 2	P0A7E1
zapC	1	b0946	ECK120000798	1005952	1006494	forward			Cell division protein ZapC (FtsZ-associated protein C) (Z-ring-associated protein C)	180	cell division protein ZapC	P75862
ycbX	1	b0947	ECK120003086	1006491	1007600	reverse			Uncharacterized protein YcbX	369	protein involved in base analog detoxification	P75863
rlmL	1	b0948	ECK120003087	1007844	1009952	forward			Ribosomal RNA large subunit methyltransferase K/L [Includes: 23S rRNA m2G2445 methyltransferase (EC 2.1.1.173) (rRNA (guanine-N(2)-)-methyltransferase RlmL); 23S rRNA m7G2069 methyltransferase (EC 2.1.1.264) (rRNA (guanine-N(7)-)-methyltransferase RlmK)]	702	fused 23S rRNA m<sup>2</sup>G2445 methyltransferase and 23S rRNA m<sup>7</sup>G2069 methyltransferase	P75864
uup	1	b0949	ECK120003088	1009964	1011871	forward			ABC transporter ATP-binding protein uup	635	ATP-binding protein with possible role in replication	P43672
pqiA	1	b0950	ECK120003089	1012001	1013254	forward			Paraquat-inducible protein A	417	paraquat-inducible protein A	P0AFL9
pqiB	1	b0951	ECK120003090	1013259	1014899	forward			Paraquat-inducible protein B	546	paraquat-inducible protein B	P43671
ymbA	1	b0952	ECK120003091	1014896	1015459	forward			Uncharacterized lipoprotein YmbA	187	conserved protein	P0AB10
rmf	5	b0953	ECK120003092	1015715	1015882	forward			Ribosome modulation factor (RMF) (Hibernation factor RMF) (Protein E)	55	ribosome modulation factor	P0AFW2
fabA	1	b0954	ECK120002563	1015952	1016470	reverse			3-hydroxydecanoyl-[acyl-carrier-protein] dehydratase (EC 4.2.1.59) (3-hydroxyacyl-[acyl-carrier-protein] dehydratase FabA) (Beta-hydroxydecanoyl thioester dehydrase) (Trans-2-decenoyl-[acyl-carrier-protein] isomerase) (EC 5.3.3.14)	172	&beta;-hydroxyacyl-ACP dehydratase/isomerase	P0A6Q3
ycbZ	1	b0955	ECK120000267	1016539	1018299	reverse			Putative Lon protease homolog (EC 3.4.21.-) (ATP-dependent protease La homolog)	586	putative ATP-dependent protease	P75867
matP	1	b0956	ECK120003093	1018485	1018937	forward			Macrodomain Ter protein	150	macrodomain Ter protein	P0A8N0
ompA	1	b0957	ECK120002403	1019013	1020053	reverse			Outer membrane protein A (Outer membrane protein II*)	346	outer membrane porin A	P0A910
sulA	1	b0958	ECK120000662	1020410	1020919	reverse			Cell division inhibitor SulA	169	SOS cell division inhibitor	P0AFZ5
sxy	1	b0959	ECK120000973	1021138	1021767	forward			Protein Sxy (Competence activator Sxy)	209	transcriptional coactivator for CRP	P75869
yccS	1	b0960	ECK120003094	1021730	1023883	reverse			Inner membrane protein YccS	717	predicted inner membrane protein	P75870
yccF	1	b0961	ECK120003095	1023902	1024348	reverse			Inner membrane protein YccF	148	conserved inner membrane protein	P0AB12
helD	1	b0962	ECK120003096	1024471	1026525	forward			DNA helicase IV (EC 3.6.4.12) (75 kDa helicase)	684	DNA helicase IV	P15038
mgsA	1	b0963	ECK120000419	1026557	1027015	reverse			Methylglyoxal synthase (MGS) (EC 4.2.3.3)	152	methylglyoxal synthase	P0A731
yccT	2	b0964	ECK120003097	1027111	1027773	reverse			UPF0319 protein YccT	220	conserved protein	P0A8X4
yccU	1	b0965	ECK120003098	1027946	1028359	forward			Uncharacterized protein YccU	137	predicted CoA-binding protein with NAD(P)-binding Rossmann-fold domain	P75874
hspQ	1	b0966	ECK120003099	1028404	1028721	reverse			Heat shock protein HspQ	105	heat shock protein, hemimethylated DNA-binding protein	P0AB20
rlmI	1	b0967	ECK120003100	1028779	1029969	reverse			Ribosomal RNA large subunit methyltransferase I (EC 2.1.1.191) (23S rRNA m5C1962 methyltransferase) (rRNA (cytosine-C(5)-)-methyltransferase RlmI)	396	23S rRNA m<sup>5</sup>C1962 methyltransferase	P75876	yes
yccX	1	b0968	ECK120003101	1030064	1030342	forward			Acylphosphatase (EC 3.6.1.7) (Acylphosphate phosphohydrolase)	92	acylphosphatase	P0AB65
tusE	1	b0969	ECK120003102	1030339	1030668	reverse			Sulfurtransferase TusE (EC 2.8.1.-) (tRNA 2-thiouridine synthesizing protein E)	109	sulfur transfer protein	P0AB18
yccA	1	b0970	ECK120002415	1030759	1031418	reverse			Modulator of FtsH protease YccA	219	putative carrier/transport protein; substrate or modulator of FtsH-mediated proteolysis	P0AAC6
hyaA	1	b0972	ECK120002535	1032139	1033257	forward			Hydrogenase-1 small chain (HYD1) (EC 1.12.99.6) (Membrane-bound hydrogenase 1 small subunit) (NiFe hydrogenase)	372	hydrogenase 1, small subunit	P69739
hyaB	1	b0973	ECK120000461	1033254	1035047	forward			Hydrogenase-1 large chain (HYD1) (EC 1.12.99.6) (Membrane-bound hydrogenase 1 large subunit) (NiFe hydrogenase)	597	hydrogenase 1, large subunit	P0ACD8
hyaC	2	b0974	ECK120000462	1035066	1035773	forward			Probable Ni/Fe-hydrogenase 1 B-type cytochrome subunit	235	hydrogenase 1, b-type cytochrome subunit	P0AAM1
hyaD	1	b0975	ECK120000463	1035770	1036357	forward			Hydrogenase 1 maturation protease (EC 3.4.23.-)	195	protein involved in processing of HyaA and HyaB proteins	P19930
hyaE	6	b0976	ECK120000464	1036354	1036752	forward			Hydrogenase-1 operon protein HyaE	132	protein involved in quality control of HyaA	P19931
hyaF	2	b0977	ECK120000465	1036749	1037606	forward			Hydrogenase-1 operon protein HyaF	285	protein involved in nickel incorporation into hydrogenase 1 proteins	P19932
appC	1	b0978	ECK120000466	1037740	1039284	forward			Cytochrome bd-II ubiquinol oxidase subunit 1 (EC 1.10.3.10) (Cytochrome bd-II oxidase subunit I)	514	cytochrome <i>bd</i>-II terminal oxidase subunit I	P26459
appB	1	b0979	ECK120001347	1039296	1040432	forward			Cytochrome bd-II ubiquinol oxidase subunit 2 (EC 1.10.3.10) (Cytochrome bd-II oxidase subunit II)	378	cytochrome <i>bd</i>-II terminal oxidase subunit II	P26458
appX	9	b4592	ECK120003206	1040445	1040537	forward			Putative cytochrome bd-II ubiquinol oxidase subunit AppX	30	small outer membrane protein	P24244
appA	1	b0980	ECK120030072	1040617	1041915	forward			Periplasmic AppA protein [Includes: Phosphoanhydride phosphohydrolase (EC 3.1.3.2) (pH 2.5 acid phosphatase) (AP); 4-phytase (EC 3.1.3.26)]	432	periplasmic protein with phosphoanhydride phosphatase and multiple inositol-polyphosphate phosphatase activity	P07102
etk	1	b0981	ECK120000045	1042030	1044210	reverse			Tyrosine-protein kinase etk (EC 2.7.10.-)	726	autophosphorylating protein tyrosine kinase	P38134
etp	1	b0982	ECK120001758	1044230	1044676	reverse			Low molecular weight protein-tyrosine-phosphatase Etp (EC 3.1.3.48)	148	phosphotyrosine-protein phosphatase	P0ACZ2
gfcE	1	b0983	ECK120003103	1044664	1045803	reverse			Putative polysaccharide export protein GfcE (Group 4 capsule protein E homolog)	379	predicted exopolysaccharide export protein	P0A932
gfcD	1	b0984	ECK120003104	1045849	1047945	reverse			Uncharacterized lipoprotein GfcD (Group 4 capsule protein D homolog)	698	putative lipoprotein	P75882
gfcC	1	b0985	ECK120003105	1047945	1048691	reverse			Uncharacterized protein GfcC (Group 4 capsule protein C homolog)	248	conserved protein	P75883
gfcB	1	b0986	ECK120003106	1048688	1049332	reverse			Uncharacterized lipoprotein GfcB (Group 4 capsule protein B homolog)	214	predicted outer membrane lipoprotein	P75884
gfcA	No age assigned	b0987	ECK120016282	1049439	1049744	reverse			Threonine-rich inner membrane protein GfcA (Group 4 capsule protein A homolog)	101	putative protein	P75885
insA-4	1	b4516	ECK120003111	1049833	1050108	forward			Insertion element IS1 4 protein InsA (IS1d)	91	IS1 protein InsA	P0CF10
insB-4	1	b0988	ECK120023912	1050027	1050530	forward			Insertion element IS1 4 protein InsB (IS1d)	167	IS1 protein InsB	P57998
cspH	1	b0989	ECK120003109	1050963	1051175	reverse			Cold shock-like protein CspH (CSP-H)	70	stress protein, member of the CspA family	P0A982
cspG	1	b0990	ECK120003110	1051461	1051673	forward			Cold shock-like protein CspG (CPS-G)	70	cold shock protein CspG	P0A978
ymcE	9	b0991	ECK120003112	1051847	1052077	forward			Uncharacterized protein YmcE	76	small protein YmcE	P0AAA5
gnsA	9	b4517	ECK120001494	1052067	1052240	forward			Protein GnsA	57	predicted regulator of phosphatidylethanolamine synthesis	P0AC92
yccM	1	b0992	ECK120002666	1052289	1053362	reverse			Putative electron transport protein YccM	357	predicted 4Fe-4S membrane protein	P52636
torS	1	b0993	ECK120003113	1053434	1056178	reverse			Sensor protein TorS (EC 2.7.13.3)	914	TorS sensory histidine kinase	P39453
torT	1	b0994	ECK120003114	1056261	1057289	forward			Periplasmic protein TorT	342	periplasmic sensory protein associated with the TorRS two-component regulatory system	P38683
torR	1	b0995	ECK120003115	1057262	1057954	reverse			TorCAD operon transcriptional regulatory protein TorR	230	TorR transcriptional dual regulator	P38684
torC	1	b0996	ECK120002334	1058084	1059256	forward			Cytochrome c-type protein TorC	390	trimethylamine N-oxide reductase, cytochrome c-type subunit	P33226
torA	1	b0997	ECK120001748	1059256	1061802	forward			Trimethylamine-N-oxide reductase 1 (TMAO reductase 1) (Trimethylamine oxidase 1) (EC 1.7.2.3)	848	trimethylamine N-oxide reductase, catalytic subunit	P33225
torD	1	b0998	ECK120001747	1061799	1062398	forward			Chaperone protein TorD	199	chaperone protein for trimethylamine-N-oxide oxidoreductase I	P36662
cbpM	1	b0999	ECK120002084	1062550	1062855	reverse			Chaperone modulatory protein CbpM	101	chaperone modulator protein CbpM	P63264
cbpA	1	b1000	ECK120002083	1062855	1063775	reverse			Curved DNA-binding protein	306	chaperone with DnaK; curved DNA-binding protein	P36659
yccE	9	b1001	ECK120002082	1064036	1065292	forward			Uncharacterized protein YccE (ORF-D)	418	putative protein	P36661
agp	1	b1002	ECK120002085	1065585	1066826	forward			Glucose-1-phosphatase (G1Pase) (EC 3.1.3.10)	413	glucose-1-phosphatase	P19926
yccJ	1	b1003	ECK120000030	1066864	1067091	reverse			Uncharacterized protein YccJ	75	putative protein	P0AB14
wrbA	1	b1004	ECK120003116	1067112	1067708	reverse			NAD(P)H dehydrogenase (quinone) (EC 1.6.5.2) (Flavoprotein WrbA) (NAD(P)H:quinone oxidoreductase) (NQO)	198	NAD(P)H:quinone oxidoreductase	P0A8G6
ymdF	1	b4518	ECK120003202	1068081	1068254	forward			Uncharacterized protein YmdF	57	conserved protein	P56614
rutG	1	b1006	ECK120016295	1068511	1069839	reverse			Putative pyrimidine permease RutG	442	uracil:H<sup>+</sup> symporter RutG	P75892
rutF	1	b1007	ECK120003117	1069860	1070354	reverse			FMN reductase (NADH) RutF (EC 1.5.1.42) (FMN reductase) (NADH-flavin reductase RutF) (NADH:flavin oxidoreductase)	164	flavin reductase	P75893
rutE	1	b1008	ECK120003118	1070365	1070955	reverse			Probable malonic semialdehyde reductase RutE (EC 1.1.1.298)	196	predicted malonic semialdehyde reductase	P75894
rutD	1	b1009	ECK120003119	1070965	1071765	reverse			Putative aminoacrylate hydrolase RutD (EC 3.5.1.-) (Aminohydrolase)	266	predicted aminoacrylate hydrolase	P75895
rutC	1	b1010	ECK120003120	1071773	1072159	reverse			Putative aminoacrylate peracid reductase RutC (EC 1.-.-.-)	128	predicted aminoacrylate peracid reductase	P0AFQ5
rutB	1	b1011	ECK120003121	1072171	1072863	reverse			Peroxyureidoacrylate/ureidoacrylate amidohydrolase RutB (EC 3.5.1.110) (Ureidoacrylate amidohydrolase)	230	peroxyureidoacrylate / ureidoacrylate amido hydrolase	P75897
rutA	1	b1012	ECK120003122	1072863	1074011	reverse			Pyrimidine monooxygenase RutA (EC 1.14.99.46)	382	pyrimidine oxygenase	P75898
rutR	1	b1013	ECK120003123	1074242	1074880	forward			HTH-type transcriptional regulator RutR (Rut operon repressor)	212	RutR DNA-binding transcriptional dual regulator	P0ACU2
putA	1	b1014	ECK120002180	1074920	1078882	reverse			Bifunctional protein PutA [Includes: Proline dehydrogenase (EC 1.5.5.2) (Proline oxidase); Delta-1-pyrroline-5-carboxylate dehydrogenase (P5C dehydrogenase) (EC 1.2.1.88) (L-glutamate gamma-semialdehyde dehydrogenase)]	1320	fused PutA transcriptional repressor / proline dehydrogenase / 1-pyrroline-5-carboxylate dehydrogenase	P09546
putP	1	b1015	ECK120000792	1079305	1080813	forward			Sodium/proline symporter (Proline permease) (Propionate transporter)	502	proline:Na<sup>+</sup> symporter	P07117
efeU_1	1	b1016	ECK120003124	1081356	1081466	forward	Split gene (partner efeU_2)	BioCyC: pseudogene - contains N-terminal part of a gene encoding ferrous iron permease	Putative inactive ferrous iron permease EfeU (Putative Fe(2+) ion permease EfeU)	36		P75901
efeU_2	Split gene		ECK120003129	1081454	1082185	forward	Split gene (partner efeU_1)	BioCyC: pseudogene - contains C-terminal part of a gene encoding ferrous iron permease		243
efeO	1	b1018	ECK120016545	1082243	1083370	forward			Iron uptake system component EfeO	375	periplasmic protein, component of cryptic ferrous ion transporter	P0AB24
efeB	1	b1019	ECK120003125	1083376	1084647	forward			Deferrochelatase/peroxidase EfeB (EC 1.11.1.-)	423	heme-containing peroxidase/deferrochelatase	P31545
phoH	1	b1020	ECK120001674	1084992	1086056	forward			Protein PhoH (Phosphate starvation-inducible protein PsiH)	354	ATP-binding protein	P0A9K1
pgaD	9	b1021	ECK120001673	1086106	1086519	reverse			Biofilm PGA synthesis protein PgaD	137	poly-&beta;-1,6-N-acetyl-D-glucosamine synthase - PgaD subunit	P69432	yes
pgaC	1	b1022	ECK120003126	1086521	1087846	reverse			Poly-beta-1,6-N-acetyl-D-glucosamine synthase (PGA synthase) (Poly-beta-1,6-GlcNAc synthase) (EC 2.4.1.-) (Biofilm PGA synthesis protein PgaC) (N-acetylglucosaminyltransferase PgaC)	441	poly-&beta;-1,6-N-acetyl-D-glucosamine synthase - PgaC subunit	P75905	yes
pgaB	1	b1023	ECK120003127	1087839	1089857	reverse			Poly-beta-1,6-N-acetyl-D-glucosamine N-deacetylase (PGA N-deacetylase) (Poly-beta-1,6-GlcNAc N-deacetylase) (EC 3.5.1.-)	672	poly-&beta;-1,6-N-acetyl-D-glucosamine N-deacetylase	P75906	yes
pgaA	1	b1024	ECK120003128	1089866	1092289	reverse			Poly-beta-1,6-N-acetyl-D-glucosamine export protein (PGA export protein) (Poly-beta-1,6-GlcNAc export protein)	807	partially N-deacetylated poly-&beta;-1,6-N-acetyl-D-glucosamine outer membrane porin	P69434	yes
dgcT	1	b1025	ECK120003130	1092876	1094234	forward			Probable diguanylate cyclase DgcT (DGC) (EC 2.7.7.65)	452	diguanylate cyclase	P75908	yes
insF-4	1	b1026	ECK120023910	1094275	1095141	reverse			Transposase InsF for insertion sequence IS3D	288		P0CF82
insE-4	2	b1027	ECK120003132	1095138	1095446	reverse		CJ: gene appears to be the same but with short size discrepancy	Transposase InsE for insertion sequence IS3D	102	IS3 element protein InsE	P0CF69
ymdE	2		ECK120003177	1095544	1095846	forward		CJ: gene appears to be the same but with short size discrepancy	Putative uncharacterized protein YmdE	100	putative protein	Q7DFV4
ycdU	5	b1029	ECK120003133	1095843	1096829	forward			Uncharacterized protein YcdU	328	predicted inner membrane protein	P75910
ghrA	1	b1033	ECK120002539	1097886	1098824	forward			Glyoxylate/hydroxypyruvate reductase A (EC 1.1.1.79) (EC 1.1.1.81) (2-ketoacid reductase)	312	glyoxylate reductase / hydroxypyruvate reductase	P75913
ycdX	1	b1034	ECK120003135	1098879	1099616	forward			Probable phosphatase YcdX (EC 3.1.3.-)	245	zinc-binding phosphatase	P75914
ycdY	1	b1035	ECK120003136	1099640	1100194	forward			Chaperone protein YcdY	184	protein involved in maturation of YcdX	P75915
ycdZ	1	b1036	ECK120003137	1100296	1100787	forward			Inner membrane protein YcdZ	163	predicted inner membrane protein	P75916
csgG	5	b1037	ECK120003138	1100851	1101684	reverse			Curli production assembly/transport component CsgG	277	curli secretion channel	P0AEA2	yes
csgF	1	b1038	ECK120003139	1101711	1102127	reverse			Curli production assembly/transport component CsgF	138	curli assembly component	P0AE98	yes
csgE	5	b1039	ECK120003140	1102152	1102541	reverse			Curli production assembly/transport component CsgE	129	curli transport specificity factor	P0AE95	yes
csgD	1	b1040	ECK120003141	1102546	1103196	reverse			CsgBAC operon transcriptional regulatory protein	216	CsgD DNA-binding transcriptional dual regulator	P52106	yes
csgB	1	b1041	ECK120003142	1103951	1104406	forward			Minor curlin subunit	151	curlin, minor subunit	P0ABK7	yes
csgA	1	b1042	ECK120003143	1104447	1104902	forward			Major curlin subunit	151	curlin, major subunit	P28307	yes
csgC	5	b1043	ECK120001445	1104961	1105293	forward			Curli assembly protein CsgC	110	inhibitor of CsgA amyloid formation	P52107
ymdA	2	b1044	ECK120003144	1105414	1105725	forward			Uncharacterized protein YmdA	103	putative protein	P75917
ymdB	1	b1045	ECK120003145	1105820	1106353	forward			O-acetyl-ADP-ribose deacetylase (EC 3.5.1.-) (Regulator of RNase III activity)	177	<i>O</i>-acetyl-ADP-ribose deacetylase, regulator of RNase III activity	P0A8D6	yes
clsC	1	b1046	ECK120003146	1106355	1107776	forward			Cardiolipin synthase C (CL synthase) (EC 2.7.8.-)	473	cardiolipin synthase 3	P75919
opgC	1	b1047	ECK120003147	1107784	1108941	reverse			Glucans biosynthesis protein C (EC 2.1.-.-)	385	protein required for succinyl modification of osmoregulated periplasmic glucans	P75920
opgG	1	b1048	ECK120003148	1109335	1110870	forward			Glucans biosynthesis protein G	511	periplasmic protein associated with synthesis of osmoregulated periplasmic glucans (OPGs)	P33136
opgH	1	b1049	ECK120001815	1110863	1113406	forward			Glucans biosynthesis glucosyltransferase H (EC 2.4.1.-)	847	membrane glycosyltransferase; synthesis of osmoregulated periplasmic glucans (OPGs)	P62517
yceK	2	b1050	ECK120001816	1113579	1113806	forward			Uncharacterized protein YceK	75	predicted lipoprotein	P0AB31
msyB	1	b1051	ECK120002354	1113807	1114181	reverse			Acidic protein MsyB	124	acidic protein that suppresses heat sensitivity of a <i>secY</i> mutant	P25738
mdtG	1	b1053	ECK120003149	1114264	1115490	reverse			Multidrug resistance protein MdtG	408	multidrug efflux pump MdtG	P25744
lpxL	1	b1054	ECK120001314	1115662	1116582	reverse			Lipid A biosynthesis lauroyltransferase (EC 2.3.1.241) (Kdo(2)-lipid IV(A) lauroyltransferase)	306	lauroyl acyltransferase	P0ACV0
yceA	1	b1055	ECK120000457	1116807	1117859	forward			UPF0176 protein YceA (ORF39.9)	350	conserved protein	P24188
yceI	1	b1056	ECK120001100	1117901	1118476	reverse			Protein YceI	191	putative protein	P0A8X2
yceJ	1	b1057	ECK120001752	1118480	1119046	reverse			Cytochrome b561 homolog 2	188	predicted cytochrome b561	P75925
yceO	9	b1058	ECK120003150	1119307	1119447	reverse			Uncharacterized protein YceO	46	small protein involved in biofilm formation and acid stress response	P64442	yes
solA	1	b1059	ECK120003151	1119468	1120586	reverse			N-methyl-L-tryptophan oxidase (MTOX) (EC 1.5.3.-)	372	<I>N</I>-methyltryptophan oxidase	P40874
bssS	2	b1060	ECK120003152	1120701	1120955	reverse			Biofilm regulator BssS	84	regulator of biofilm formation	P0AB33	yes
dinI	1	b1061	ECK120003153	1121242	1121487	reverse			DNA damage-inducible protein I	81	DNA damage-inducible protein I	P0ABR1
pyrC	1	b1062	ECK120003154	1121561	1122607	reverse			Dihydroorotase (DHOase) (EC 3.5.2.3)	348	dihydroorotase	P05020
yceB	1	b1063	ECK120000797	1122713	1123273	reverse			Uncharacterized lipoprotein YceB	186	predicted lipoprotein	P0AB26
grxB	1	b1064	ECK120001101	1123407	1124054	reverse			Glutaredoxin 2 (Grx2)	215	reduced glutaredoxin 2	P0AC59
mdtH	1	b1065	ECK120002353	1124118	1125326	reverse			Multidrug resistance protein MdtH	402	multidrug efflux pump	P69367
rimJ	1	b1066	ECK120003155	1125562	1126146	forward			Ribosomal-protein-alanine acetyltransferase (EC 2.3.1.128) (Acetylating enzyme for N-terminal of ribosomal protein S5)	194	ribosomal-protein-S5-alanine N-acetyltransferase	P0A948
yceH	1	b1067	ECK120000842	1126157	1126804	forward			UPF0502 protein YceH (G20.3)	215	conserved protein	P29217
yceM	1	b1068	ECK120001491	1126806	1127729	forward			Putative oxidoreductase YceM (EC 1.-.-.-)	307	predicted oxidoreductase, NAD(P)-binding Rossmann-fold domain	P75931
murJ	1	b1069	ECK120003156	1127839	1129374	forward			Lipid II flippase MurJ (Peptidoglycan biosynthesis protein MurJ)	511	lipid II flippase	P0AF16
flgN	1	b1070	ECK120003157	1129414	1129830	reverse			Flagella synthesis protein FlgN	138	flagellar biosynthesis protein FlgN	P43533
flgM	1	b1071	ECK120003158	1129835	1130128	reverse			Negative regulator of flagellin synthesis (Anti-sigma-28 factor)	97	anti-sigma factor for FliA (&sigma;<sup>28</sup>)	P0AEM4
flgA	1	b1072	ECK120002689	1130204	1130863	reverse			Flagella basal body P-ring formation protein FlgA	219	flagellar biosynthesis; assembly of basal-body periplasmic P ring	P75933
flgB	1	b1073	ECK120002678	1131018	1131434	forward			Flagellar basal body rod protein FlgB (Putative proximal rod protein)	138	flagellar basal-body rod protein FlgB	P0ABW9
flgC	1	b1074	ECK120002679	1131438	1131842	forward			Flagellar basal-body rod protein FlgC (Putative proximal rod protein)	134	flagellar basal-body rod protein FlgC	P0ABX2
flgD	1	b1075	ECK120002680	1131854	1132549	forward			Basal-body rod modification protein FlgD	231	flagellar biosynthesis, initiation of hook assembly	P75936
flgE	1	b1076	ECK120002682	1132574	1133782	forward			Flagellar hook protein FlgE	402	flagellar hook protein FlgE	P75937
flgF	1	b1077	ECK120002683	1133802	1134557	forward			Flagellar basal-body rod protein FlgF (Putative proximal rod protein)	251	flagellar basal-body rod protein FlgF	P75938
flgG	1	b1078	ECK120002684	1134729	1135511	forward			Flagellar basal-body rod protein FlgG (Distal rod protein)	260	flagellar basal-body rod protein FlgG	P0ABX5
flgH	1	b1079	ECK120002685	1135564	1136262	forward			Flagellar L-ring protein (Basal body L-ring protein)	232	flagellar L-ring protein FlgH; basal-body outer-membrane L (lipopolysaccharide layer) ring protein	P0A6S0
flgI	1	b1080	ECK120002686	1136274	1137371	forward			Flagellar P-ring protein (Basal body P-ring protein)	365	flagellar P-ring protein FlgI	P0A6S3
flgJ	1	b1081	ECK120002687	1137371	1138312	forward			Peptidoglycan hydrolase FlgJ (EC 3.2.1.-) (Muramidase FlgJ)	313	FlgJ	P75942
flgK	1	b1082	ECK120002688	1138378	1140021	forward			Flagellar hook-associated protein 1 (HAP1)	547	flagellar biosynthesis, hook-filament junction protein 1	P33235
flgL	1	b1083	ECK120001893	1140033	1140986	forward			Flagellar hook-associated protein 3 (HAP3) (Hook-filament junction protein)	317	flagellar biosynthesis; hook-filament junction protein	P29744
rne	1	b1084	ECK120001499	1141182	1144367	reverse			Ribonuclease E (RNase E) (EC 3.1.26.12)	1061	RNase E	P21513
yceQ	9	b1085	ECK120000850	1144502	1144822	forward			Uncharacterized protein YceQ	106	putative protein	P62066
rluC	1	b1086	ECK120003159	1144940	1145899	forward			Ribosomal large subunit pseudouridine synthase C (EC 5.4.99.24) (23S rRNA pseudouridine(955/2504/2580) synthase) (rRNA pseudouridylate synthase C) (rRNA-uridine isomerase C)	319	23S rRNA pseudouridine<sup>955/2504/2580</sup> synthase	P0AA39
yceF	1	b1087	ECK120001402	1146011	1146595	reverse			Maf-like protein YceF	194	m<sup>7</sup>GTP pyrophosphatase	P0A729
yceD	1	b1088	ECK120002575	1146794	1147315	forward			Large ribosomal RNA subunit accumulation protein YceD (23S rRNA accumulation protein YceD) (G30K)	173	conserved protein	P0AB28
rpmF	1	b1089	ECK120001103	1147367	1147540	forward			50S ribosomal protein L32 (Large ribosomal subunit protein bL32)	57	50S ribosomal subunit protein L32	P0A7N4
plsX	1	b1090	ECK120000881	1147621	1148691	forward			Phosphate acyltransferase (EC 2.3.1.n2) (Acyl-ACP phosphotransacylase) (Acyl-[acyl-carrier-protein]--phosphate acyltransferase) (Phosphate-acyl-ACP acyltransferase)	356	fatty acid/phospholipid synthesis protein	P27247
fabH	1	b1091	ECK120001401	1148759	1149712	forward			3-oxoacyl-[acyl-carrier-protein] synthase 3 (EC 2.3.1.180) (3-oxoacyl-[acyl-carrier-protein] synthase III) (Beta-ketoacyl-ACP synthase III) (KAS III) (EcFabH)	317	&beta;-ketoacyl-ACP synthase III	P0A6R0
fabD	1	b1092	ECK120000271	1149728	1150657	forward			Malonyl CoA-acyl carrier protein transacylase (MCT) (EC 2.3.1.39)	309	malonyl-CoA-ACP transacylase	P0AAI9
fabG	1	b1093	ECK120001288	1150670	1151404	forward			3-oxoacyl-[acyl-carrier-protein] reductase FabG (EC 1.1.1.100) (3-ketoacyl-acyl carrier protein reductase) (Beta-Ketoacyl-acyl carrier protein reductase) (Beta-ketoacyl-ACP reductase)	244	3-oxoacyl-[acyl-carrier-protein] reductase subunit	P0AEK2
acpP	1	b1094	ECK120001289	1151615	1151851	forward			Acyl carrier protein (ACP) (Cytosolic-activating factor) (CAF) (Fatty acid synthase acyl carrier protein)	78	apo-[acyl carrier protein]	P0A6A8
fabF	1	b1095	ECK120002562	1151939	1153180	forward			3-oxoacyl-[acyl-carrier-protein] synthase 2 (EC 2.3.1.179) (3-oxoacyl-[acyl-carrier-protein] synthase II) (Beta-ketoacyl-ACP synthase II) (KAS II)	413	&beta;-ketoacyl-ACP synthase II	P0AAI5
pabC	1	b1096	ECK120002329	1153300	1154109	forward			Aminodeoxychorismate lyase (EC 4.1.3.38) (4-amino-4-deoxychorismate lyase) (ADC lyase) (ADCL)	269	aminodeoxychorismate lyase	P28305
mltG	1	b1097	ECK120001449	1154112	1155134	forward			Endolytic murein transglycosylase (EC 4.2.2.-) (Peptidoglycan polymerization terminase)	340	endolytic murein transglycosylase	P28306
tmk	1	b1098	ECK120001450	1155124	1155765	forward			Thymidylate kinase (EC 2.7.4.9) (Thymidine monophosphate kinase) (dTMP kinase) (TMPK)	213	dTMP kinase	P0A720
holB	1	b1099	ECK120002181	1155762	1156766	forward			DNA polymerase III subunit delta' (EC 2.7.7.7)	334	DNA polymerase III, &delta; prime subunit	P28631
ycfH	1	b1100	ECK120001456	1156777	1157574	forward			Uncharacterized metal-dependent hydrolase YcfH (EC 3.1.-.-)	265	predicted metallodependent hydrolase	P0AFQ7
ptsG	1	b1101	ECK120002182	1157869	1159302	forward			PTS system glucose-specific EIICB component (EIICB-Glc) (EII-Glc) [Includes: Glucose permease IIC component (PTS system glucose-specific EIIC component); Glucose-specific phosphotransferase enzyme IIB component (EC 2.7.1.199) (PTS system glucose-specific EIIB component)]	477	glucose PTS permease - PtsG subunit	P69786
fhuE	1	b1102	ECK120000778	1159362	1161551	reverse			FhuE receptor (Outer-membrane receptor for Fe(III)-coprogen, Fe(III)-ferrioxamine B and Fe(III)-rhodotrulic acid)	729	ferric coprogen outer membrane porin FhuE	P16869
hinT	1	b1103	ECK120000300	1161885	1162244	forward			Purine nucleoside phosphoramidase (EC 3.9.1.-) (Histidine triad nucleotide binding protein HinT) (HIT protein)	119	purine nucleoside phosphoramidase	P0ACE7
ycfL	2	b1104	ECK120002067	1162247	1162624	forward			Uncharacterized protein YcfL	125	putative protein	P75946
lpoB	1	b1105	ECK120003160	1162638	1163279	forward			Penicillin-binding protein activator LpoB (PBP activator LpoB) (Lipoprotein activator of PBP from the outer membrane B)	213	outer membrane lipoprotein - activator of MrcB activity	P0AB38
thiK	2	b1106	ECK120003161	1163260	1164084	forward			Thiamine kinase (EC 2.7.1.89)	274	thiamin kinase	P75948
nagZ	1	b1107	ECK120003162	1164095	1165120	forward			Beta-hexosaminidase (EC 3.2.1.52) (Beta-N-acetylhexosaminidase) (N-acetyl-beta-glucosaminidase)	341	&beta;-N-acetylhexosaminidase	P75949
ycfP	1	b1108	ECK120003163	1165143	1165685	forward			UPF0227 protein YcfP	180	conserved protein	P0A8E1
ndh	1	b1109	ECK120003164	1166085	1167389	forward			NADH dehydrogenase (EC 1.6.99.3)	434	NADH:quinone oxidoreductase II	P00393
ycfJ	1	b1110	ECK120000642	1167599	1168138	forward			Uncharacterized protein YcfJ	179	putative protein	P0AB35	yes
comR	1	b1111	ECK120002297	1168200	1168832	reverse			HTH-type transcriptional repressor ComR (Copper outer membrane regulator)	210	ComR DNA-binding transcriptional repressor	P75952
bhsA	1	b1112	ECK120003165	1169073	1169330	forward			Multiple stress resistance protein BhsA (Copper-induced outer membrane component)	85	outer membrane protein involved in copper permeability, stress resistance and biofilm formation	P0AB40	yes
ldtC	1	b1113	ECK120003166	1169412	1170374	reverse			Probable L,D-transpeptidase YcfS (EC 2.-.-.-)	320	L,D-transpeptidase YcfS	P75954
mfd	1	b1114	ECK120003167	1170518	1173964	reverse			Transcription-repair-coupling factor (TRCF) (EC 3.6.4.-)	1148	transcription-repair coupling factor	P30958
ycfT	1	b1115	ECK120001567	1174092	1175165	reverse			Inner membrane protein YcfT	357	inner membrane protein YcfT	P75955
lolC	1	b1116	ECK120003168	1175427	1176626	forward			Lipoprotein-releasing system transmembrane protein LolC	399	lipoprotein release complex - inner membrane subunit	P0ADC3
lolD	1	b1117	ECK120003169	1176619	1177320	forward			Lipoprotein-releasing system ATP-binding protein LolD (EC 3.6.3.-)	233	lipoprotein release complex - ATP binding subunit	P75957
lolE	1	b1118	ECK120003170	1177320	1178564	forward			Lipoprotein-releasing system transmembrane protein LolE	414	lipoprotein release complex - inner membrane subunit	P75958
nagK	1	b1119	ECK120003171	1178593	1179504	forward			N-acetyl-D-glucosamine kinase (EC 2.7.1.59) (GlcNAc kinase)	303	<i>N</i>-acetyl-D-glucosamine kinase	P75959
cobB	1	b1120	ECK120003172	1179520	1180359	forward			NAD-dependent protein deacylase (EC 3.5.1.-) (Regulatory protein SIR2 homolog)	279	protein-lysine deacetylase and desuccinylase	P75960
ycfZ	6	b1121	ECK120003173	1180479	1181267	reverse			Inner membrane protein YcfZ	262	predicted inner membrane protein	P75961
ymfA	1	b1122	ECK120003174	1181264	1181725	reverse			Inner membrane protein YmfA	153	predicted inner membrane protein	P75962
potD	1	b1123	ECK120003175	1181783	1182829	reverse			Spermidine/putrescine-binding periplasmic protein (SPBP)	348	putrescine / spermidine ABC transporter - periplasmic binding protein	P0AFK9
potC	1	b1124	ECK120000743	1182826	1183620	reverse			Spermidine/putrescine transport system permease protein PotC	264	putrescine / spermidine ABC transporter - membrane subunit	P0AFK6
potB	1	b1125	ECK120000742	1183617	1184444	reverse			Spermidine/putrescine transport system permease protein PotB	275	putrescine / spermidine ABC transporter - membrane subunit	P0AFK4
potA	1	b1126	ECK120000741	1184458	1185594	reverse			Spermidine/putrescine import ATP-binding protein PotA (EC 3.6.3.31)	378	putrescine / spermidine ABC transporter - ATP binding subunit	P69874
pepT	1	b1127	ECK120000740	1185844	1187070	forward			Peptidase T (EC 3.4.11.4) (Aminotripeptidase) (Tripeptidase) (Tripeptide aminopeptidase)	408	peptidase T	P29745
roxA	1	b1128	ECK120001503	1187119	1188240	reverse			50S ribosomal protein L16 3-hydroxylase (EC 1.14.11.47) (Ribosomal oxygenase RoxA) (ROX)	373	ribosomal protein-arginine oxygenase	P27431
phoQ	1	b1129	ECK120001394	1188316	1189776	reverse			Sensor protein PhoQ (EC 2.7.13.3) (EC 3.1.3.-) (Sensor histidine protein kinase/phosphatase PhoQ)	486	PhoQ sensory histidine kinase	P23837
phoP	1	b1130	ECK120000723	1189776	1190447	reverse			Transcriptional regulatory protein PhoP	223	PhoP DNA-binding transcriptional dual regulator	P23836
purB	1	b1131	ECK120000722	1190616	1191986	reverse			Adenylosuccinate lyase (ASL) (EC 4.3.2.2) (Adenylosuccinase) (ASase)	456	adenylosuccinate lyase	P0AB89
hflD	1	b1132	ECK120001285	1191990	1192631	reverse			High frequency lysogenization protein HflD	213	lysogenization regulator	P25746
mnmA	1	b1133	ECK120001316	1192667	1193773	reverse			tRNA-specific 2-thiouridylase MnmA (EC 2.8.1.13)	368	tRNA-specific 2-thiouridylase	P25745
nudJ	1	b1134	ECK120001315	1193827	1194288	reverse			Phosphatase NudJ (EC 3.6.1.-)	153	nucleoside di- and triphosphate hydrolase/HMP-PP hydrolase/thiamin pyrophosphate hydrolase	P0AEI6
rluE	1	b1135	ECK120003176	1194298	1194951	reverse			Ribosomal large subunit pseudouridine synthase E (EC 5.4.99.20) (rRNA pseudouridylate synthase E) (rRNA-uridine isomerase E)	217	23S rRNA pseudouridine<sup>2457</sup> synthase	P75966
icd	1	b1136	ECK120000482	1195123	1196373	forward			Isocitrate dehydrogenase [NADP] (IDH) (EC 1.1.1.42) (IDP) (NADP(+)-specific ICDH) (Oxalosuccinate decarboxylase)	416	isocitrate dehydrogenase	P08200		e14
ymfD	1	b1137	ECK120002608	1196867	1197532	reverse			Uncharacterized protein YmfD	221	e14 prophage; predicted SAM-dependent methyltransferase	P75967		e14
ymfE	7	b1138	ECK120003178	1197533	1198237	reverse			Uncharacterized protein YmfE	234	e14 prophage; predicted inner membrane protein	P75968		e14
lit	5	b1139	ECK120003179	1198695	1199588	forward			Cell death peptidase (Bacteriophage T4 late gene expression-blocking protein) (GpLit)	297	Lit, cell death peptidase; phage exclusion; e14 prophage	P11072		e14
intE	1	b1140	ECK120000528	1199679	1200806	reverse			Prophage integrase IntE (Int(Lambda)) (Prophage e14 integrase) (Prophage lambda integrase)	375	e14 prophage; predicted integrase	P75969		e14
xisE	5	b1141	ECK120002238	1200787	1201032	reverse			Prophage excisionase-like protein (Excisionase-like protein from lambdoid prophage 14)	81	e14 prophage; predicted excisionase	P75970		e14
ymfH	9	b1142	ECK120003180	1201069	1201380	reverse			Putative uncharacterized protein b1142	103	e14 prophage; predicted protein	P75971		(e14)
ymfI	9	b1143	ECK120003181	1201497	1201838	forward			Uncharacterized protein YmfI	113	e14 prophage; predicted protein	P75972		e14
ymfJ	9	b1144	ECK120003182	1201776	1202084	reverse			Uncharacterized protein YmfJ	102	e14 prophage; predicted protein	P75973		e14
ymfK	1	b1145	ECK120003183	1202259	1202933	reverse			Prophage repressor CohE (Putative lambdoid prophage e14 repressor protein C2)	224	e14 prophage; predicted repressor protein	P75974		e14
ymfT	5	b1146	ECK120003184	1203024	1203224	forward			Prophage transcriptional regulatory protein (Putative lambdoid prophage e14 transcriptional regulatory protein)	66	e14 prophage; predicted DNA-binding transcriptional regulator	P75975		e14
ymfL	1	b1147	ECK120003186	1203268	1203825	forward			Uncharacterized protein YmfL	185	e14 prophage; predicted DNA-binding transcriptional regulator	P75976		e14
ymfM	9	b1148	ECK120003187	1203822	1204160	forward			Uncharacterized protein YmfM	112	e14 prophage; predicted protein	P75977		e14
ymfN	1	b4693	ECK120002772	1204170	1205537	forward			Uncharacterized protein YmfN	455	e14 prophage; predicted DNA-binding transcriptional regulator	P75978		e14
ymfR	9	b1150	ECK120003188	1205549	1205731	forward			Uncharacterized protein YmfR	60	e14 prophage; predicted protein	P75979		e14
beeE	2	b1151	ECK120003189	1205731	1206204	forward			Putative protein BeeE (Putative protein BeeE from lambdoid prophage e14 region)	157	e14 prophage; conserved protein	P75980		e14
jayE	1	b1152	ECK120003190	1206131	1206922	forward			Putative protein JayE (Putative protein JayE from lambdoid prophage e14 region)	263	e14 prophage; conserved protein	P75981		e14
ymfQ	1	b1153	ECK120003191	1206913	1207497	forward			Uncharacterized protein YmfQ (Uncharacterized protein YmfQ in lambdoid prophage e14 region)	194	e14 prophage; conserved protein	P75982		e14
ycfK	1	b1154	ECK120003192	1207501	1208130	forward			Uncharacterized protein StfP (Uncharacterized protein StfP from lambdoid prophage e14 region)	209	e14 prophage; predicted protein	P45581		e14
ymfS	1	b1155	ECK120002416	1208132	1208545	forward			Uncharacterized protein YmfS	137	e14 prophage; predicted protein	P09154		e14
tfaE	1	b1156	ECK120003193	1208517	1209119	reverse			Prophage tail fiber assembly protein homolog TfaE (Tail fiber assembly protein homolog from lambdoid prophage e14)	200	e14 prophage; predicted tail fiber assembly protein	P09153		e14
stfE	1	b1157	ECK120001104	1209119	1209655	reverse			Putative uncharacterized protein StfE (Side tail fiber protein homolog from lambdoid prophage e14)	178	e14 prophage; predicted side tail fiber protein fragment	P33227		e14
pinE	1	b1158	ECK120003194	1209685	1210239	forward			Serine recombinase PinE (EC 3.1.22.-) (EC 6.5.1.-) (DNA-invertase PinE) (DNA-invertase from lambdoid prophage e14) (Site-specific recombinase PinE)	184	e14 prophage; site-specific DNA recombinase	P03014		e14
mcrA	1	b1159	ECK120000566	1210346	1211179	forward			5-methylcytosine-specific restriction enzyme A (EC 3.1.21.-) (EcoKMcrA)	277	restriction of DNA at 5-methylcytosine residues	P24200		e14
icdC	Not in Uniprot		ECK120003203	1211425	1211577	forward		Ecogene: pseudogene, isocitrate dehydrogenase C-terminal gene fragment		50	conserved protein
iraM	5	b1160	ECK120026447	1211680	1212003	reverse			Anti-adapter protein IraM (Enhancing lycopene biosynthesis protein 1)	107	anti-adaptor protein IraM, inhibitor of &sigma;<sup>S</sup> proteolysis	P75987
ycgX	5	b1161	ECK120003195	1212703	1213107	reverse			Uncharacterized protein YcgX	134	uncharacterized protein YcgX	P75988
bluR	1	b1162	ECK120003196	1213328	1214059	reverse			HTH-type transcriptional repressor BluR	243	BluR DNA-binding transcriptional repressor	P75989
bluF	1	b1163	ECK120003197	1214264	1215475	reverse			Blue light- and temperature-regulated antirepressor BluF (Blrp)	403	blue light-responsive regulator of BluR	P75990
ycgZ	1	b1164	ECK120003198	1215789	1216025	forward			Probable two-component-system connector protein YcgZ	78	putative protein	P75991
ymgA	5	b1165	ECK120003199	1216068	1216340	forward			Probable two-component-system connector protein YmgA	90	protein involved in biofilm formation	P75992	yes
ariR	1	b1166	ECK120003200	1216369	1216635	forward			Probable two-component-system connector protein AriR	88	regulator of acid resistance, influenced by indole	P75993	yes
ymgC	5	b1167	ECK120003201	1216748	1216996	forward			Uncharacterized protein YmgC	82	protein involved in biofilm formation	P75994	yes
pdeG	1	b1168	ECK120003204	1217328	1218851	forward			Probable cyclic di-GMP phosphodiesterase PdeG (EC 3.1.4.52)	507	predicted c-di-GMP phosphodiesterase	P75995
ymgF	9	b4520	ECK120030073	1218983	1219201	forward			Inner membrane protein YmgF	72	inner membrane protein that interacts with cell division proteins	P58034
ycgH_1	Not in Uniprot		ECK120015304	1220801	1221121	forward				106	conserved protein; member of the Autotransporter family
ycgH_2	Not in Uniprot		ECK120003213	1221206	1222222	forward				338	conserved protein; member of the Autotransporter family
ymgD	6	b1171	ECK120003205	1222305	1222634	reverse			Uncharacterized protein YmgD	109	putative protein	P0AB46
ymgG	9	b1172	ECK120030074	1222644	1222988	reverse			UPF0757 protein YmgG	114	putative protein	Q7DFV3
ymgI	9	b4593	ECK120003207	1222990	1223163	reverse			Uncharacterized protein YmgI	57	hypothetical protein	A5A611
ymgJ	9	b4594	ECK120003228	1223264	1223449	forward			Uncharacterized protein YmgJ	61	hypothetical protein	A5A612
ymgH	2	b4521	ECK120001002	1223465	1223686	forward	Split gene (partner ycgI)	Uniprot: YcgI is the full length of regulonDB ymgH+ycgI after correcting a frameshift at position 70	Putative uncharacterized protein YcgI	73	putative protein	P76000
ycgI	Split gene	b1173	ECK120016296	1223695	1223907	forward	Split gene (partner ymgH)			70	putative protein
minE	1	b1174	ECK120003208	1224279	1224545	reverse			Cell division topological specificity factor	88	topological specificity factor of the Min system that regulates septum placement	P0A734
minD	1	b1175	ECK120000591	1224549	1225361	reverse			Septum site-determining protein MinD (Cell division inhibitor MinD)	270	membrane ATPase of the MinC-MinD-MinE system that regulates septum placement	P0AEZ3
minC	1	b1176	ECK120000590	1225385	1226080	reverse			Septum site-determining protein MinC	231	effector protein of the MinC-MinD-MinE system that regulates septum placement	P18196
ycgJ	5	b1177	ECK120000589	1226600	1226968	forward			Uncharacterized protein YcgJ	122	putative protein	P76001
pliG	5	b1178	ECK120003209	1227071	1227472	reverse			Inhibitor of g-type lysozyme	133	inhibitor of g-type lysozyme	P76002
ycgL	2	b1179	ECK120003210	1227681	1228007	forward			Protein YcgL	108	conserved protein	P0AB43
ycgM	1	b1180	ECK120003211	1228079	1228738	forward			Uncharacterized protein YcgM	219	predicted isomerase/hydrolase	P76004
ycgN	1	b1181	ECK120003212	1228815	1229276	forward			UPF0260 protein YcgN	153	conserved protein	P0A8L5
hlyE	1	b1182	ECK120003214	1229483	1230394	reverse			Hemolysin E, chromosomal (Cytotoxin ClyA) (Hemolysis-inducing protein) (Latent pore-forming 34 kDa hemolysin) (Silent hemolysin SheA)	303	hemolysin E	P77335
umuD	1	b1183	ECK120002609	1230767	1231186	forward			Protein UmuD (EC 3.4.21.-) (DNA polymerase V) (Pol V) [Cleaved into: Protein UmuD']	139	SOS mutagenesis; error-prone repair; processed to UmuD'; forms complex with UmuC	P0AG11
umuC	1	b1184	ECK120001046	1231186	1232454	forward			Protein UmuC (DNA polymerase V) (Pol V)	422	SOS mutagenesis and repair	P04152
dsbB	1	b1185	ECK120001045	1232500	1233030	reverse			Disulfide bond formation protein B (Disulfide oxidoreductase)	176	protein disulfide oxidoreductase - DsbB<sub>reduced</sub>	P0A6M2
nhaB	1	b1186	ECK120001360	1233176	1234717	reverse			Na(+)/H(+) antiporter NhaB (Sodium/proton antiporter NhaB)	513	sodium:H<sup>+</sup> antiporter	P0AFA7
fadR	1	b1187	ECK120001359	1234938	1235657	forward			Fatty acid metabolism regulator protein	239	FadR DNA-binding transcriptional dual regulator	P0A8V6
ycgB	1	b1188	ECK120000275	1235709	1237241	reverse			Uncharacterized protein YcgB	510	conserved protein	P29013
dadA	1	b1189	ECK120001471	1237571	1238869	forward			D-amino acid dehydrogenase (EC 1.4.99.-) (D-alanine dehydrogenase)	432	D-amino acid dehydrogenase	P0A6J5
dadX	1	b1190	ECK120001373	1238879	1239949	forward			Alanine racemase, catabolic (EC 5.1.1.1)	356	alanine racemase 2, PLP-binding	P29012
cvrA	1	b1191	ECK120001374	1240335	1242071	reverse			K(+)/H(+) antiporter NhaP2 (Potassium/proton antiporter NhaP2)	578	predicted K<sup>+</sup>:H<sup>+</sup> antiporter	P76007
ldcA	1	b1192	ECK120003215	1242166	1243080	reverse			Murein tetrapeptide carboxypeptidase (EC 3.4.17.13) (LD-carboxypeptidase A) (Muramoyltetrapeptide carboxypeptidase)	304	L,D-carboxypeptidase A	P76008
emtA	1	b1193	ECK120003216	1243180	1243791	forward			Endo-type membrane-bound lytic murein transglycosylase A (EC 4.2.2.n2) (Peptidoglycan lytic endotransglycosylase)	203	lytic murein transglycosylase E	P0C960
ycgR	1	b1194	ECK120003217	1243793	1244527	reverse			Flagellar brake protein YcgR (Cyclic di-GMP binding protein YcgR)	244	molecular brake that regulates flagellar motility in response to c-di-GMP	P76010
ymgE	2	b1195	ECK120003218	1244728	1244982	forward			UPF0410 protein YmgE (Transglycosylase-associated gene protein)	84	predicted inner membrane protein	P76011
ycgY	9	b1196	ECK120003219	1245160	1245600	forward			Uncharacterized protein YcgY	146	putative protein	P76012
treA	1	b1197	ECK120003220	1245679	1247376	reverse			Periplasmic trehalase (EC 3.2.1.28) (Alpha,alpha-trehalase) (Alpha,alpha-trehalose glucohydrolase) (Tre37A)	565	periplasmic trehalase	P13482
dhaM	1	b1198	ECK120001006	1247696	1249114	reverse			Protein-lysine deacetylase (EC 3.5.1.-) (Dihydroxyacetone kinase subunit M) (Lysine deacetylase) (KDAC) (PEP-dependent dihydroxyacetone kinase, phosphoryl donor subunit DhaM)	472	dihydroxyacetone kinase subunit M and protein-acetyllysine deacetylase	P37349
dhaL	1	b1199	ECK120002261	1249125	1249757	reverse			PEP-dependent dihydroxyacetone kinase, ADP-binding subunit DhaL (EC 2.7.1.121)	210	dihydroxyacetone kinase subunit L	P76014
dhaK	1	b1200	ECK120003221	1249768	1250838	reverse			PEP-dependent dihydroxyacetone kinase, dihydroxyacetone-binding subunit DhaK (EC 2.7.1.121)	356	dihydroxyacetone kinase subunit K	P76015
dhaR	1	b1201	ECK120003222	1251066	1252985	forward			PTS-dependent dihydroxyacetone kinase operon regulatory protein	639	DhaR DNA-binding transcriptional dual regulator	P76016
ycgV	1	b1202	ECK120003223	1253085	1255952	reverse			Uncharacterized protein YcgV	955	putative adhesion and penetration protein	P76017	yes
ychF	1	b1203	ECK120003224	1256721	1257812	reverse			Ribosome-binding ATPase YchF	363	ribosome-binding ATPase, inhibitor of catalase activity	P0ABU2
pth	1	b1204	ECK120001370	1257929	1258513	reverse			Peptidyl-tRNA hydrolase (PTH) (EC 3.1.1.29)	194	peptidyl-tRNA hydrolase	P0A7D1
ychH	2	b1205	ECK120000776	1258791	1259069	forward			Uncharacterized protein YchH	92	stress-induced protein	P0AB49	yes
dauA	1	b1206	ECK120001487	1259124	1260803	reverse			C4-dicarboxylic acid transporter DauA (Dicarboxylic acid uptake system A)	559	C4 dicarboxylate transporter DauA	P0AFR2
prs	1	b1207	ECK120002255	1260928	1261875	reverse			Ribose-phosphate pyrophosphokinase (RPPK) (EC 2.7.6.1) (5-phospho-D-ribosyl alpha-1-diphosphate) (Phosphoribosyl diphosphate synthase) (Phosphoribosyl pyrophosphate synthase) (P-Rib-PP synthase) (PRPP synthase) (PRPPase)	315	ribose-phosphate diphosphokinase	P0A717
ispE	1	b1208	ECK120000765	1262026	1262877	reverse			4-diphosphocytidyl-2-C-methyl-D-erythritol kinase (CMK) (EC 2.7.1.148) (4-(cytidine-5'-diphospho)-2-C-methyl-D-erythritol kinase)	283	4-diphosphocytidyl-2-C-methylerythritol kinase	P62615
lolB	2	b1209	ECK120001267	1262877	1263500	reverse			Outer-membrane lipoprotein LolB	207	outer membrane lipoprotein, localization of lipoproteins in the outer membrane	P61320
hemA	1	b1210	ECK120001266	1263714	1264970	forward			Glutamyl-tRNA reductase (GluTR) (EC 1.2.1.70)	418	glutamyl-tRNA reductase	P0A6X1
prfA	1	b1211	ECK120000420	1265012	1266094	forward			Peptide chain release factor RF1 (RF-1)	360	peptide chain release factor RF1	P0A7I0
prmC	1	b1212	ECK120000752	1266094	1266927	forward			Release factor glutamine methyltransferase (RF MTase) (EC 2.1.1.297) (M.EcoKHemKP) (N5-glutamine methyltransferase PrmC) (Protein release factor methylation C) (Protein-(glutamine-N5) MTase PrmC) (Protein-glutamine N-methyltransferase PrmC)	277	protein-(glutamine-<i>N</i><sup>5</sup>) methyltransferase	P0ACC1
ychQ	1	b1213	ECK120002282	1266924	1267316	forward			Protein YchQ (Protein SirB2)	130	predicted transcriptional regulator	Q46755
ychA	1	b1214	ECK120003225	1267320	1268129	forward			UPF0162 protein YchA (Protein SirB1)	269	predicted transcriptional regulator	P0AGM5
kdsA	1	b1215	ECK120002659	1268165	1269019	forward			2-dehydro-3-deoxyphosphooctonate aldolase (EC 2.5.1.55) (3-deoxy-D-manno-octulosonic acid 8-phosphate synthase) (KDO-8-phosphate synthase) (KDO 8-P synthase) (KDOPS) (Phospho-2-dehydro-3-deoxyoctonate aldolase)	284	3-deoxy-D-<i>manno</i>-octulosonate 8-phosphate synthase	P0A715
ldrA	9	b4419	ECK120000511	1269168	1269275	reverse		LdrA and LdrC sequence is identical. Sequence identical to obsolete Uniprot entry Q6BF86	Small toxic polypeptide LdrA	35	small toxic polypeptide LdrA	P0DPD0
ldrB	9	b4421	ECK120002656	1269703	1269810	reverse			Small toxic polypeptide LdrB	35	small toxic polypeptide LdrB	Q6BF87
ldrC	Identical to LdrA	b4423	ECK120002658	1270238	1270345	reverse		LdrA and LdrC sequence is identical. Sequence identical to obsolete Uniprot entry Q6BF86	Small toxic polypeptide LdrC	35	small toxic polypeptide LdrC	P0DPD1
chaA	1	b1216	ECK120002660	1270749	1271849	reverse			Sodium-potassium/proton antiporter ChaA (Na(+)/H(+) exchanger)	366	Na<sup>+</sup> / K<sup>+</sup>:H<sup>+</sup> antiporter ChaA/Na<sup>+</sup> / K<sup>+</sup>:H<sup>+</sup> antiporter ChaA	P31801
chaB	1	b1217	ECK120001691	1272119	1272349	forward			Putative cation transport regulator ChaB	76	predicted cation transport regulator	P0AE63
chaC	1	b1218	ECK120002264	1272507	1273202	forward			Glutathione-specific gamma-glutamylcyclotransferase (Gamma-GCG) (EC 4.3.2.7) (Cation transport regulatory protein ChaC)	231	predicted glutathione-specific gamma-glutamylcyclotransferase	P39163
ychN	1	b1219	ECK120002265	1273246	1273599	reverse			Protein YchN	117	conserved protein	P0AB52
ychO	1	b1220	ECK120002266	1273784	1275178	forward			Uncharacterized protein YchO	464	putative invasin	P39165
narL	1	b1221	ECK120002267	1275179	1275829	reverse			Nitrate/nitrite response regulator protein NarL	216	NarL DNA-binding transcriptional dual regulator	P0AF28
narX	1	b1222	ECK120000639	1275822	1277618	reverse			Nitrate/nitrite sensor protein NarX (EC 2.7.13.3)	598	NarX	P0AFA2
narK	1	b1223	ECK125203398	1277957	1279348	forward			Nitrate/nitrite transporter NarK (Nitrite extrusion protein 1) (Nitrite facilitator 1)	463	nitrate:nitrite antiporter NarK	P10903
narG	1	b1224	ECK120000635	1279864	1283607	forward			Respiratory nitrate reductase 1 alpha chain (EC 1.7.5.1) (Nitrate reductase A subunit alpha) (Quinol-nitrate oxidoreductase subunit alpha)	1247	nitrate reductase A, &alpha; subunit	P09152
narH	1	b1225	ECK120000631	1283604	1285142	forward			Respiratory nitrate reductase 1 beta chain (EC 1.7.5.1) (Nitrate reductase A subunit beta) (Quinol-nitrate oxidoreductase subunit beta)	512	nitrate reductase A, &beta; subunit	P11349
narJ	1	b1226	ECK120000632	1285139	1285849	forward			Nitrate reductase molybdenum cofactor assembly chaperone NarJ (Redox enzyme maturation protein NarJ)	236	molybdenum cofactor assembly chaperone subunit (&delta; subunit) of nitrate reductase 1	P0AF26
narI	1	b1227	ECK120000634	1285849	1286526	forward			Respiratory nitrate reductase 1 gamma chain (EC 1.7.5.1) (Cytochrome B-NR) (Nitrate reductase A subunit gamma) (Quinol-nitrate oxidoreductase subunit gamma)	225	nitrate reductase A, &gamma; subunit	P11350
ychS	9	b1228	ECK120003226	1286709	1286984	forward			Putative uncharacterized protein YchS	91	putative protein	P76023
tpr	No age assigned	b1229	ECK120002661	1287087	1287176	reverse			Protamine-like protein	29	predicted protamine-like protein	P02338
purU	1	b1232	ECK120002548	1287782	1288624	reverse			Formyltetrahydrofolate deformylase (EC 3.5.1.10) (Formyl-FH(4) hydrolase)	280	formyltetrahydrofolate deformylase	P37051
ychJ	1	b1233	ECK120001751	1288674	1289132	reverse			UPF0225 protein YchJ	152	conserved protein	P37052
rssA	1	b1234	ECK120002022	1289245	1290150	forward			NTE family protein RssA	301	conserved protein	P0AFR0
rssB	1	b1235	ECK120002023	1290242	1291255	forward			Regulator of RpoS	337	regulator of RpoS	P0AEV1
galU	1	b1236	ECK120002024	1291457	1292365	forward			UTP--glucose-1-phosphate uridylyltransferase (EC 2.7.7.9) (Alpha-D-glucosyl-1-phosphate uridylyltransferase) (UDP-glucose pyrophosphorylase) (UDPGP) (Uridine diphosphoglucose pyrophosphorylase)	302	UTP:glucose-1-phosphate uridylyltransferase	P0AEP3
hns	1	b1237	ECK120001290	1292509	1292922	reverse			DNA-binding protein H-NS (Heat-stable nucleoid-structuring protein) (Histone-like protein HLP-II) (Protein B1) (Protein H1)	137	H-NS DNA-binding transcriptional dual regulator	P0ACF8	yes
tdk	1	b1238	ECK120001559	1293527	1294144	forward			Thymidine kinase (EC 2.7.1.21)	205	thymidine kinase/deoxyuridine kinase	P23331
ychG_2	1		ECK120000983	1294426	1295016	reverse	Split gene (partner ychG_1)	Uniprot: ychG is result of correcting frameshift between the pseudogenes ychG_1 and ychG_2	Putative uncharacterized protein YchG	196	putative protein	P30192
ychG_1	Split gene		ECK120000028	1294968	1295198	reverse	Split gene (partner ychG_2)			76	predicted protein, N-terminal fragment
adhE	1	b1241	ECK120003227	1295446	1298121	reverse			Aldehyde-alcohol dehydrogenase [Includes: Alcohol dehydrogenase (ADH) (EC 1.1.1.1); Acetaldehyde dehydrogenase [acetylating] (ACDH) (EC 1.2.1.10); Pyruvate-formate-lyase deactivase (PFL deactivase)]	891	aldehyde-alcohol dehydrogenase	P0A9Q7
ychE	1	b1242	ECK125135293	1298598	1299245	forward			UPF0056 membrane protein YhcE	215	predicted inner membrane protein	P25743
Pseudo Gene	Not in Uniprot		ECK120030075	1299474	1300927	forward		BioCyc: pseudogene disrupted by IS5 insertion - maybe RNA gene?!		483.667	OppA5'
insH21	Not in Uniprot	b4711	ECK120000405	1299531	1300547	forward				338	IS5 transposase and trans-activator
oppA	1	b1243	ECK125229292	1301182	1302813	forward			Periplasmic oligopeptide-binding protein	543	peptide ABC transporter - periplasmic binding protein	P23843
oppB	1	b1244	ECK120000667	1302899	1303819	forward			Oligopeptide transport system permease protein OppB	306	murein tripeptide ABC transporter / peptide ABC transporter - putative membrane subunit	P0AFH2
oppC	1	b1245	ECK120000668	1303834	1304742	forward			Oligopeptide transport system permease protein OppC	302	murein tripeptide ABC transporter / peptide ABC transporter - putative membrane subunit	P0AFH6
oppD	1	b1246	ECK120000669	1304754	1305767	forward			Oligopeptide transport ATP-binding protein OppD	337	murein tripeptide ABC transporter / peptide ABC transporter - putative ATP binding subunit	P76027
oppF	1	b1247	ECK120000670	1305764	1306768	forward			Oligopeptide transport ATP-binding protein OppF	334	murein tripeptide ABC transporter / peptide ABC transporter - putative ATP binding subunit	P77737
yciU	2	b1248	ECK120000671	1306821	1307150	reverse			UPF0263 protein YciU	109	putative protein	P0A8L7
clsA	1	b1249	ECK120001556	1307185	1308645	reverse			Cardiolipin synthase A (CL synthase) (EC 2.7.8.-)	486	cardiolipin synthase 1	P0A6H8
yciY	5	b4595	ECK120000672	1308788	1308961	forward			Uncharacterized protein YciY	57	conserved protein	A5A613
kch	1	b1250	ECK120002602	1309016	1310269	reverse			Voltage-gated potassium channel Kch	417	K<sup>+</sup> channel Kch	P31069
yciI	1	b1251	ECK120001554	1310569	1310865	reverse			Protein YciI	98	predicted enzyme	P0AB55
tonB	1	b1252	ECK120001555	1311089	1311808	forward			Protein TonB	239	TonB energy transducing system - TonB subunit	P02929
yciA	1	b1253	ECK120001001	1311848	1312246	reverse			Acyl-CoA thioester hydrolase YciA (EC 3.1.2.-) (Protein P14)	132	acyl-CoA thioesterase	P0A8Z0
yciB	1	b1254	ECK120001105	1312351	1312890	reverse			Probable intracellular septation protein A	179	inner membrane protein	P0A710
yciC	1	b1255	ECK120001106	1312920	1313663	reverse			UPF0259 membrane protein YciC	247	predicted inner membrane protein	P21365
ompW	1	b1256	ECK120001107	1314020	1314658	forward			Outer membrane protein W	212	outer membrane protein W	P0A915
yciE	2	b1257	ECK120001108	1314718	1315224	reverse			Protein YciE	168	conserved protein	P21363
yciF	1	b1258	ECK120001109	1315270	1315770	reverse			Protein YciF	166	conserved protein	P21362
yciG	1	b1259	ECK120001110	1315856	1316035	reverse			Uncharacterized protein YciG	59	putative protein	P21361
trpA	1	b1260	ECK120001111	1316416	1317222	reverse			Tryptophan synthase alpha chain (EC 4.2.1.20)	268	tryptophan synthase, &alpha; subunit	P0A877
trpB	1	b1261	ECK120001013	1317222	1318415	reverse			Tryptophan synthase beta chain (EC 4.2.1.20)	397	tryptophan synthase, &beta; subunit	P0A879
trpC	1	b1262	ECK120001014	1318427	1319788	reverse			Tryptophan biosynthesis protein TrpCF [Includes: Indole-3-glycerol phosphate synthase (IGPS) (EC 4.1.1.48); N-(5'-phospho-ribosyl)anthranilate isomerase (PRAI) (EC 5.3.1.24)]	453	indole-3-glycerol phosphate synthase/phosphoribosylanthranilate isomerase	P00909
trpD	1	b1263	ECK120001015	1319789	1321384	reverse			Bifunctional protein TrpGD [Includes: Anthranilate synthase component 2 (AS) (ASII) (EC 4.1.3.27) (Anthranilate synthase, glutamine amidotransferase component); Anthranilate phosphoribosyltransferase (EC 2.4.2.18)]	531	anthranilate synthase component II	P00904
trpE	1	b1264	ECK120001016	1321384	1322946	reverse			Anthranilate synthase component 1 (AS) (ASI) (EC 4.1.3.27)	520	anthranilate synthase component I	P00895
trpL	No age assigned	b1265	ECK120001017	1323038	1323082	reverse			trp operon leader peptide	14	trp operon leader peptide	P0AD92
yciV	1	b1266	ECK120001248	1323220	1324101	forward			5'-3' exoribonuclease (EC 3.1.13.-) (3',5'-nucleotide bisphosphate phosphatase) (EC 3.1.3.97) (RNase AM)	293	RNA/ssDNA exonuclease 5' &rarr; 3' specific	P77766
yciO	1	b1267	ECK120003229	1324098	1324718	forward			Uncharacterized protein YciO	206	conserved protein	P0AFR4
yciQ	1	b1268	ECK120003230	1324746	1326641	forward			Uncharacterized protein YciQ	631	predicted inner membrane protein	P45848
rluB	1	b1269	ECK120003231	1326852	1327727	forward			Ribosomal large subunit pseudouridine synthase B (EC 5.4.99.22) (23S rRNA pseudouridine(2605) synthase) (rRNA pseudouridylate synthase B) (rRNA-uridine isomerase B)	291	23S rRNA pseudouridine<sup>2605</sup> synthase	P37765
btuR	1	b1270	ECK120002288	1327767	1328357	reverse			Cob(I)yrinic acid a,c-diamide adenosyltransferase (EC 2.5.1.17) (Cob(I)alamin adenosyltransferase) (Corrinoid adenosyltransferase)	196	cobinamide adenosyltransferase/cobalamin adenosyltransferase	P0A9H5
yciK	1	b1271	ECK120000126	1328354	1329112	reverse			Uncharacterized oxidoreductase YciK (EC 1.-.-.-)	252	predicted oxidoreductase	P31808
sohB	1	b1272	ECK120001695	1329332	1330381	forward			Probable protease SohB (EC 3.4.21.-)	349	predicted inner membrane peptidase	P0AG14
yciN	1	b1273	ECK120000945	1330417	1330668	reverse			Protein YciN	83	putative protein	P0AB61
topA	1	b1274	ECK120002411	1331048	1333645	forward			DNA topoisomerase 1 (EC 5.99.1.2) (DNA topoisomerase I) (Omega-protein) (Relaxing enzyme) (Swivelase) (Untwisting enzyme)	865	DNA topoisomerase I	P06612
cysB	1	b1275	ECK120016922	1333855	1334829	forward			HTH-type transcriptional regulator CysB (Cys regulon transcriptional activator)	324	CysB transcriptional dual regulator	P0A9F3
ymiA	5	b4522	ECK120000179	1335124	1335288	forward			Uncharacterized protein YmiA	54	small predicted membrane protein	P0CB62
yciX	9	b4523	ECK120003250	1335291	1335458	forward			Uncharacterized protein YciX	55	putative protein	P58094
acnA	1	b1276	ECK120016923	1335831	1338506	forward			Aconitate hydratase A (ACN) (Aconitase) (EC 4.2.1.3) (Iron-responsive protein-like) (IRP-like) (RNA-binding protein) (Stationary phase enzyme)	891	aconitate hydratase 1	P25516
ribA	1	b1277	ECK120001296	1338570	1339160	reverse			GTP cyclohydrolase-2 (EC 3.5.4.25) (GTP cyclohydrolase II)	196	GTP cyclohydrolase II	P0A7I7
pgpB	2	b1278	ECK120001302	1339330	1340094	forward			Phosphatidylglycerophosphatase B (EC 3.1.3.27) (Diacylglycerol pyrophosphate phosphatase) (DGPP phosphatase) (EC 3.1.3.81) (Phosphatidate phosphatase) (EC 3.1.3.4) (Undecaprenyl pyrophosphate phosphatase) (EC 3.6.1.27) (Undecaprenyl-diphosphatase)	254	phosphatidylglycerophosphatase/diacylglycerol pyrophosphate phosphatase/undecaprenyl pyrophosphate phosphatase	P0A924
lapA	2	b1279	ECK120000697	1340243	1340551	forward			Lipopolysaccharide assembly protein A	102	lipopolysaccharide assembly protein LapA	P0ACV4
lapB	1	b1280	ECK120003232	1340558	1341727	forward			Lipopolysaccharide assembly protein B (Lipopolysaccharide regulatory protein)	389	lipopolysaccharide assembly protein LapB	P0AB58
pyrF	1	b1281	ECK120002356	1341921	1342658	forward			Orotidine 5'-phosphate decarboxylase (EC 4.1.1.23) (OMP decarboxylase) (OMPDCase) (OMPdecase)	245	orotidine-5'-phosphate decarboxylase	P08244
yciH	1	b1282	ECK120000800	1342658	1342984	forward			Uncharacterized protein YciH	108	putative translation factor	P08245
osmB	2	b1283	ECK120001112	1343110	1343328	reverse			Osmotically-inducible lipoprotein B	72	OsmB osmotically inducible lipoprotein	P0ADA7
yciT	1	b1284	ECK120003233	1343597	1344346	reverse			Uncharacterized HTH-type transcriptional regulator YciT	249	DNA-binding transcriptional regulator	P76034
yciZ	5	b4596	ECK120004456	1344436	1344609	reverse			UPF0509 protein YciZ	57	hypothetical protein	A5A614
pdeR	1	b1285	ECK120003234	1344757	1346742	reverse			Cyclic di-GMP phosphodiesterase PdeR (EC 3.1.4.52)	661	cyclic di-GMP phosphodiesterase	P77334
ymiB	9		ECK120003235	1346796	1346900	forward			Putative protein YmiB	34	putative protein YmiB	C1P5Z9
rnb	1	b1286	ECK125240986	1346978	1348912	reverse			Exoribonuclease 2 (EC 3.1.13.1) (Exoribonuclease II) (RNase II) (Ribonuclease II)	644	ribonuclease II	P30850
yciW	1	b1287	ECK120001568	1348980	1350107	reverse			Uncharacterized protein YciW	375	predicted oxidoreductase	P76035
fabI	1	b1288	ECK120001482	1350251	1351039	reverse			Enoyl-[acyl-carrier-protein] reductase [NADH] FabI (ENR) (EC 1.3.1.9) (NADH-dependent enoyl-ACP reductase)	262	enoyl-[acyl-carrier-protein] reductase subunit	P0AEK4
ycjD	1	b1289	ECK125203386	1351407	1351760	reverse			Uncharacterized protein YcjD	117	conserved protein	P45736
sapF	1	b1290	ECK120003236	1351828	1352634	reverse			Putrescine export system ATP-binding protein SapF	268	ATP binding protein SapF of predicted ABC transporter	P0AAH8
sapD	1	b1291	ECK120002184	1352636	1353628	reverse			Putrescine export system ATP-binding protein SapD	330	ATP binding protein implicated in Trk mediated K<sup>+</sup> uptake	P0AAH4
sapC	1	b1292	ECK120002183	1353628	1354518	reverse			Putrescine export system permease protein SapC	296	integral membrane protein SapC of predicted ABC transporter	P0AGH5
sapB	1	b1293	ECK120002674	1354505	1355470	reverse			Putrescine export system permease protein SapB	321	integral membrane protein SapB of predicted ABC transporter	P0AGH3
sapA	1	b1294	ECK120002675	1355467	1357110	reverse			Probable ABC transporter periplasmic-binding protein SapA	547	periplasmic binding protein SapA of predicted ABC transporter	Q47622
ymjA	1	b1295	ECK120002676	1357423	1357668	reverse			Uncharacterized protein YmjA	81	putative protein	P0ACV8
puuP	1	b1296	ECK120003237	1357802	1359187	reverse			Putrescine importer PuuP	461	putrescine:H<sup>+</sup> symporter PuuP	P76037
puuA	1	b1297	ECK120003238	1359490	1360908	reverse			Gamma-glutamylputrescine synthetase PuuA (Gamma-Glu-Put synthetase) (EC 6.3.1.11) (Glutamate--putrescine ligase)	472	glutamate-putrescine ligase	P78061
puuD	1	b1298	ECK120003239	1361120	1361884	forward			Gamma-glutamyl-gamma-aminobutyrate hydrolase PuuD (Gamma-Glu-GABA hydrolase) (EC 3.5.1.94)	254	&gamma;-glutamyl-&gamma;-aminobutyrate hydrolase	P76038
puuR	1	b1299	ECK120003240	1361911	1362468	forward			HTH-type transcriptional regulator PuuR	185	PuuR DNA-binding transcriptional repressor	P0A9U6
puuC	1	b1300	ECK120002286	1362743	1364230	forward			NADP/NAD-dependent aldehyde dehydrogenase PuuC (ALDH) (EC 1.2.1.5) (3-hydroxypropionaldehyde dehydrogenase) (Gamma-glutamyl-gamma-aminobutyraldehyde dehydrogenase) (Gamma-Glu-gamma-aminobutyraldehyde dehydrogenase)	495	&gamma;-glutamyl-&gamma;-aminobutyraldehyde dehydrogenase	P23883
puuB	1	b1301	ECK120000033	1364232	1365512	forward			Gamma-glutamylputrescine oxidoreductase (Gamma-Glu-Put oxidase) (Gamma-glutamylputrescine oxidase) (EC 1.4.3.-)	426	&gamma;-glutamylputrescine oxidase	P37906
puuE	1	b1302	ECK120001754	1365550	1366815	forward			4-aminobutyrate aminotransferase PuuE (EC 2.6.1.19) (GABA aminotransferase) (GABA-AT) (Gamma-amino-N-butyrate transaminase) (GABA transaminase) (Glutamate:succinic semialdehyde transaminase)	421	4-aminobutyrate aminotransferase	P50457
pspF	1	b1303	ECK120003241	1366935	1367912	reverse			Psp operon transcriptional activator (Phage shock protein F)	325	PspF DNA-binding transcriptional dual regulator	P37344
pspA	1	b1304	ECK120002219	1368079	1368747	forward			Phage shock protein A	222	regulatory protein for the phage shock operon, protects membrane integrity	P0AFM6
pspB	1	b1305	ECK120000767	1368801	1369025	forward			Phage shock protein B	74	stimulates PspC-mediated transcriptional activation of the psp operon; antitoxin of a PspC-PspB toxin-antitoxin pair	P0AFM9
pspC	1	b1306	ECK120000768	1369025	1369384	forward			Phage shock protein C	119	PspC transcriptional regulator; toxin of a PspC-PspB toxin-antitoxin pair	P0AFN2
pspD	1	b1307	ECK120000769	1369393	1369614	forward			Phage shock protein D	73	peripheral inner membrane phage-shock protein	P0AFV8
pspE	1	b1308	ECK120000770	1369689	1370003	forward			Thiosulfate sulfurtransferase PspE (TST) (EC 2.8.1.1) (Phage shock protein E)	104	thiosulfate sulfurtransferase	P23857
ycjM	1	b1309	ECK120000771	1370216	1371895	forward			Glucosylglycerate phosphorylase (GGa phosphorylase) (GGaP) (EC 2.4.1.-)	559	predicted glucosyltransferase	P76041
ycjN	1	b1310	ECK120003242	1371909	1373201	forward			Putative ABC transporter periplasmic-binding protein YcjN	430	putative transport protein, ABC superfamily - periplasmic binding component	P76042
ycjO	1	b1311	ECK120003243	1373222	1374103	forward			Inner membrane ABC transporter permease protein YcjO	293	putative transport protein, ABC superfamily - membrane component	P0AFR7
ycjP	1	b1312	ECK120003244	1374090	1374932	forward			Inner membrane ABC transporter permease protein YcjP	280	putative transport protein, ABC superfamily - membrane component	P77716
ycjQ	1	b1313	ECK120003245	1374963	1376015	forward			Uncharacterized zinc-type alcohol dehydrogenase-like protein YcjQ (EC 1.-.-.-)	350	predicted oxidoreductase, Zn-dependent and NAD(P)-binding	P76043
ycjR	1	b1314	ECK120003246	1376034	1376822	forward			Probable ketose 3-epimerase (EC 5.1.3.-)	262	predicted D-tagatose 3-epimerase	P76044
ycjS	1	b1315	ECK120003247	1376832	1377887	forward			Uncharacterized oxidoreductase YcjS (EC 1.-.-.-)	351	predicted oxidoreductase, NADH-binding	P77503
ycjT	1	b1316	ECK120003248	1377884	1380151	forward			Uncharacterized glycosyl hydrolase YcjT (EC 3.2.1.-)	755	predicted hydrolase	P77154
ycjU	1	b1317	ECK120003249	1380148	1380807	forward			Beta-phosphoglucomutase (Beta-PGM) (EC 5.4.2.6)	219	&beta;-phosphoglucomutase	P77366
ycjV	1	b1318	ECK120003251	1380821	1381789	forward	Split gene (partner ymjB)	Uniprot: YcjV is result of correcting framshift at position 321 and encompasses regulonDB genes ycjV and ymjB	Putative uncharacterized ABC transporter ATP-binding protein YcjV	322	putative transport protein, ABC family - ATP binding component	P77481
ymjB	Split gene	b4524	ECK120003256	1381789	1381902	forward	Split gene (partner ycjV)			37	putative protein
ompG	5	b1319	ECK120016297	1381947	1382852	forward			Outer membrane protein G	301	outer membrane porin G	P76045
ycjW	1	b1320	ECK120003252	1382963	1383961	reverse			Uncharacterized HTH-type transcriptional regulator YcjW	332	predicted DNA-binding transcriptional regulator, LacI type	P77615
ycjX	1	b1321	ECK120003253	1384117	1385514	forward			Uncharacterized protein YcjX	465	conserved protein	P76046
ycjF	1	b1322	ECK120003254	1385511	1386572	forward			UPF0283 membrane protein YcjF	353	conserved inner membrane protein	P0A8R7
tyrR	1	b1323	ECK120002412	1386720	1388261	forward			Transcriptional regulatory protein TyrR	513	TyrR DNA-binding transcriptional dual regulator	P07604
tpx	1	b1324	ECK120001031	1388305	1388811	reverse			Thiol peroxidase (Tpx) (EC 1.11.1.15) (Peroxiredoxin tpx) (Prx) (Scavengase p20) (Thioredoxin peroxidase)	168	lipid hydroperoxide peroxidase	P0A862
ycjG	1	b1325	ECK120003255	1388930	1389895	forward			L-Ala-D/L-Glu epimerase (AE epimerase) (AEE) (EC 5.1.1.20)	321	L-Ala-D/L-Glu epimerase	P51981
mpaA	1	b1326	ECK120016298	1389870	1390598	reverse			Protein MpaA	242	murein tripeptide amidase A	P0ACV6
ymjC	5	b4525	ECK120000818	1390680	1390862	reverse			Putative uncharacterized protein YmjC	60	predicted oxidoreductase	Q2EER5
ymjD	9	b4673	ECK120003314	1390868	1390933	reverse			Putative uncharacterized protein YmjD	21	small protein	P0CD93
ycjY	1	b1327	ECK120048857	1390933	1391853	reverse			Uncharacterized protein YcjY	306	predicted hydrolase	P76049
pgrR	1	b1328	ECK120003258	1391991	1392890	forward			HTH-type transcriptional regulator PgrR (Regulator of PG recycling)	299	PgrR DNA-binding transcriptional repressor	P77333
mppA	1	b1329	ECK120003259	1393227	1394840	forward			Periplasmic murein peptide-binding protein	537	murein tripeptide ABC transporter OppBCDFMppA - periplasmic binding protein	P77348
ynaI	1	b1330	ECK120003260	1394891	1395922	reverse			Low conductance mechanosensitive channel YnaI	343	mechanosensitive channel YnaI	P0AEB5
insH-4	1	b1331	ECK120003261	1396076	1397092	forward			Transposase InsH for insertion sequence element IS5F	338	IS5 transposase and trans-activator	P0CE52
ynaJ	1	b1332	ECK120003262	1397365	1397622	forward			Uncharacterized protein YnaJ	85	predicted inner membrane protein	P64445
uspE	1	b1333	ECK120003263	1397672	1398622	reverse			Universal stress protein E	316	universal stress protein with a role cellular motility	P0AAC0	yes
fnr	1	b1334	ECK120001222	1398774	1399526	reverse			Fumarate and nitrate reduction regulatory protein	250	FNR DNA-binding transcriptional dual regulator	P0A9E5
ogt	1	b1335	ECK120000319	1399721	1400236	reverse			Methylated-DNA--protein-cysteine methyltransferase (EC 2.1.1.63) (6-O-methylguanine-DNA methyltransferase) (MGMT) (O-6-methylguanine-DNA-alkyltransferase)	171	O6-alkylguanine-DNA-alkyltransferase	P0AFH0
abgT	1	b1336	ECK120000661	1400247	1401773	reverse			p-aminobenzoyl-glutamate transport protein (PABA-GLU transport protein)	508	p-aminobenzoyl glutamate:H<sup>+</sup> symporter	P46133
abgB	1	b1337	ECK120002401	1401810	1403255	reverse			p-aminobenzoyl-glutamate hydrolase subunit B (EC 3.5.1.-) (PABA-GLU hydrolase) (PGH)	481	<i>p</i>-aminobenzoyl-glutamate hydrolase subunit B	P76052
abgA	1	b1338	ECK120003264	1403255	1404565	reverse			p-aminobenzoyl-glutamate hydrolase subunit A (EC 3.5.1.-) (PABA-GLU hydrolase) (PGH)	436	<i>p</i>-aminobenzoyl-glutamate hydrolase subunit A	P77357
abgR	1	b1339	ECK120003266	1404741	1405649	forward			HTH-type transcriptional regulator AbgR	302	predicted DNA-binding transcriptional regulator, LYSR-type	P77744
smrA	2	b1340	ECK120002610	1405979	1406542	forward			Probable DNA endonuclease SmrA (EC 3.1.-.-)	187	conserved protein with endonuclease activity	P76053
dgcM	1	b1341	ECK120003267	1406563	1407795	reverse			Diguanylate cyclase DgcM (DGC) (EC 2.7.7.65)	410	diguanylate cyclase	P77302	yes
ydaN	1	b1342	ECK125095415	1408050	1409033	forward			Zinc transport protein ZntB	327	predicted Zn(II) exporter	P64423
dbpA	1	b1343	ECK120002611	1409511	1410884	forward			ATP-dependent RNA helicase DbpA (EC 3.6.4.13)	457	ATP-dependent RNA helicase, specific for 23S rRNA	P21693
ttcA	1	b1344	ECK120000204	1411013	1411948	reverse			tRNA-cytidine(32) 2-sulfurtransferase (EC 2.8.1.-) (Two-thiocytidine biosynthesis protein A) (tRNA 2-thiocytidine biosynthesis protein TtcA)	311	tRNA C32 thiolase	P76055
intR	1	b1345	ECK120003270	1412000	1413235	reverse			Prophage integrase IntR (Putative lambdoid prophage Rac integrase)	411	Rac prophage; predicted integrase	P76056		Rac
xisR	7	b1346	ECK120003271	1413237	1413452	reverse			Uncharacterized protein YdaQ	71	Rac prophage; excisionase	P76057		Rac
ydaC	9	b1347	ECK120001830	1413531	1413740	reverse			Double-strand break reduction protein	69	protein involved in maintaining chromosome integrity / Rac prophage	P33230		Rac
ralR	9	b1348	ECK125165375	1413733	1413927	reverse			Endodeoxyribonuclease toxin RalR (DNase RalR) (EC 3.1.-.-) (Restriction alleviation and modification enhancement protein) (Toxin RalR)	64	Rac prophage; DNA endonuclease toxin of the RalRA toxin-antitoxin system, restriction alleviation and modification enhancement	P33229		Rac
recT	1	b1349	ECK120001829	1413984	1414793	reverse			Protein RecT (P33)	269	recombinase, DNA renaturation	P33228		Rac
recE	1	b1350	ECK120001828	1414786	1417386	reverse			Exodeoxyribonuclease 8 (EC 3.1.11.-) (Exodeoxyribonuclease VIII) (EXO VIII)	866	exonuclease VIII, ds DNA exonuclease, 5' --> 3' specific	P15032		Rac
racC	9	b1351	ECK120000804	1417488	1417763	reverse			Protein RacC	91	Rac prophage; predicted protein	P15033		Rac
ydaE	9	b4526	ECK120002054	1417838	1418008	reverse			Uncharacterized protein YdaE	56	Rac prophage; zinc-binding protein	P38394		Rac
kilR	9	b1352	ECK120002628	1418008	1418229	reverse			Killing protein KilR (FtsZ inhibitor protein KilR)	73	Rac prophage; inhibitor of FtsZ, killing protein	P38393		Rac
sieB	9	b1353	ECK120016300	1418671	1419159	forward			Superinfection exclusion protein B	162	Rac prophage; phage superinfection exclusion protein	P38392		Rac
ydaF	9	b4527	ECK120003280	1419156	1419311	reverse			Uncharacterized protein YdaF	51	Rac prophage; predicted protein	P0ACW0		Rac
ydaG	9	b1355	ECK120003273	1419322	1419456	reverse			Uncharacterized protein YdaG	44	Rac prophage; small protein	P76061		Rac
racR	6	b1356	ECK120003274	1419765	1420241	reverse			Prophage repressor RacR (Rac prophage repressor)	158	Rac prophage; predicted DNA-binding transcriptional regulator	P76062		Rac
ydaS	6	b1357	ECK120003275	1420365	1420661	forward			Uncharacterized protein YdaS	98	Rac prophage; predicted DNA-binding transcriptional regulator	P76063		Rac
ydaT	1	b1358	ECK120003276	1420684	1421106	forward			Uncharacterized protein YdaT	140	Rac prophage; predicted protein	P76064		Rac
ydaU	5	b1359	ECK120003277	1421119	1421976	forward			Uncharacterized protein YdaU	285	Rac prophage; conserved protein	P76065		Rac
ydaV	1	b1360	ECK120003278	1421983	1422729	forward			Uncharacterized protein YdaV	248	Rac prophage; predicted DNA replication protein	P77546		Rac
ydaW	9	b1361	ECK120003279	1422752	1423312	forward			Putative uncharacterized protein YdaW	186	Rac prophage; predicted DNA-binding protein	P76066		Rac
rzpR	1	b1362	ECK120003281	1423345	1423644	forward			Putative endopeptidase RzpR (EC 3.4.-.-) (Putative Rz endopeptidase from lambdoid prophage Rac)	99	Rac prophage; predicted defective peptidase	P77551		(Rac)
rzoR	11	b4528	ECK120002612	1423400	1423585	forward			Prophage outer membrane lipoprotein RzoR (o-spanin) (Outer membrane lipoprotein Rz1 from lambdoid prophage Rac) (Spanin from lambdoid prophage Rac, outer membrane subunit)	61	Rac prophage; predicted lipoprotein	P58042		Rac
trkG	1	b1363	ECK120016301	1423782	1425239	forward			Trk system potassium uptake protein TrkG	485	K<sup>+</sup> transporter TrkG	P23849		Rac
ynaK	1	b1365	ECK120003282	1425377	1425640	forward			Uncharacterized protein YnaK	87	Rac prophage; conserved protein	P76068		Rac
ydaY	2	b1366	ECK120003284	1425621	1425980	forward			Putative uncharacterized protein YdaY	119	Rac prophage; predicted protein	P76069		Rac
ynaA	2	b1368	ECK120003285	1426454	1427482	forward			Putative uncharacterized protein YnaA	342	Rac prophage; predicted tail protein	P77658		Rac
lomR_1	1	b1369	ECK120003286	1427458	1427613	forward		ecoliwiki: Rac prophage; predicted protein, N-ter fragment	Putative protein LomR	51	Rac prophage; predicted protein, N-ter fragment	P77184		(Rac)
insH-5	1	b1370	ECK120003287	1427746	1428726	reverse			Transposase InsH for insertion sequence element IS5Y	326	Rac prophage; IS5 transposase and trans-activator	P76071		(Rac)
lomR_2	Not in Uniprot	b1371	ECK120003288	1428814	1428984	forward				56	Rac prophage; predicted protein, C-ter fragment			(Rac)
stfR	1	b1372	ECK120003289	1429049	1432411	forward			Prophage side tail fiber protein homolog StfR (Side tail fiber protein homolog from lambdoid prophage Rac)	1120	putative membrane protein	P76072		Rac
tfaR	1	b1373	ECK120003290	1432411	1432986	forward			Prophage tail fiber assembly protein homolog TfaR (Tail fiber assembly protein homolog from lambdoid prophage Rac)	191	Rac prophage; predicted tail fiber assembly protein	P77163		Rac
pinR	1	b1374	ECK120003291	1433084	1433674	reverse			Serine recombinase PinR (EC 3.1.22.-) (EC 6.5.1.-) (DNA-invertase PinR) (Putative DNA-invertase from lambdoid prophage Rac) (Site-specific recombinase PinR)	196	Rac prophage; predicted site-specific recombinase	P0ADI0		Rac
ynaE	9	b1375	ECK120003293	1433991	1434224	reverse			Uncharacterized protein YnaE	77	Rac prophage; cold shock protein, function unknown	P76073		Rac
ttcC	Not in Uniprot		ECK120003315	1434958	1435008	reverse		EcoGene: "Pseudogene, prophage Rac integration site ttcA duplication. The attachment site of Rac is a 26 bp repeat region flanking Rac: 1409923-1409948 and 1432983-1433008 (A J. Clark, pers. comm., 1998). The ends of Rac are marked at the left end of these repeat regions to delineate attB and attP. This Rac integration event is within the ttcA gene; the first 17 aa of TtcA are Rac-derived. The tt…		16
uspF	1	b1376	ECK125240972	1435185	1435619	reverse			Universal stress protein F	144	nucleotide binding filament protein	P37903
ompN	1	b1377	ECK120003295	1435760	1436893	reverse			Outer membrane protein N (Porin OmpN)	377	outer membrane pore protein N, non-specific	P77747
ydbK	1	b1378	ECK120003296	1437260	1440784	reverse			Probable pyruvate-flavodoxin oxidoreductase (EC 1.2.7.-)	1174	pyruvate:flavodoxin oxidoreductase	P52647
ydbJ	2	b4529	ECK120003336	1441058	1441324	forward			Uncharacterized protein YdbJ	88	putative protein	P0ACW2
hslJ	1	b1379	ECK120016302	1441321	1441743	reverse			Heat shock protein HslJ	140	lipoprotein implicated in Novobiocin resistance	P52644
ldhA	1	b1380	ECK120003297	1441854	1442843	reverse			D-lactate dehydrogenase (D-LDH) (EC 1.1.1.28) (Fermentative lactate dehydrogenase)	329	D-lactate dehydrogenase - fermentative	P52643
ydbH	1	b1381	ECK120002700	1443051	1445690	forward			Uncharacterized protein YdbH	879	putative protein	P52645
ynbE	1	b1382	ECK120003298	1445687	1445872	forward			Uncharacterized protein YnbE	61	predicted lipoprotein	P64448
ydbL	2	b1383	ECK120003299	1445880	1446206	forward			Uncharacterized protein YdbL	108	conserved protein	P76076
feaR	1	b1384	ECK120003300	1446378	1447283	reverse			Transcriptional activator FeaR	301	FeaR DNA-binding transcriptional activator	Q47129
feaB	1	b1385	ECK120003301	1447519	1449018	forward			Phenylacetaldehyde dehydrogenase (PAD) (EC 1.2.1.39)	499	phenylacetaldehyde dehydrogenase	P80668
tynA	1	b1386	ECK120004448	1449076	1451349	reverse			Primary amine oxidase (EC 1.4.3.21) (2-phenylethylamine oxidase) (Copper amine oxidase) (Tyramine oxidase)	757	copper-containing amine oxidase	P46883
paaZ	1	b1387	ECK120002427	1451597	1453642	reverse			Bifunctional protein PaaZ [Includes: 2-oxepin-2(3H)-ylideneacetyl-CoA hydrolase (EC 3.3.2.12) (Oxepin-CoA hydrolase); 3-oxo-5,6-dehydrosuberyl-CoA semialdehyde dehydrogenase (EC 1.2.1.91)]	681	oxepin-CoA hydrolase/3-oxo-5,6-dehydrosuberyl-CoA semialdehyde dehydrogenase	P77455
paaA	1	b1388	ECK120003302	1453927	1454856	forward			1,2-phenylacetyl-CoA epoxidase, subunit A (EC 1.14.13.149) (1,2-phenylacetyl-CoA epoxidase, catalytic subunit alpha) (1,2-phenylacetyl-CoA monooxygenase, subunit A)	309	ring 1,2-phenylacetyl-CoA epoxidase, monooxygenase subunit	P76077
paaB	1	b1389	ECK120003303	1454868	1455155	forward			1,2-phenylacetyl-CoA epoxidase, subunit B (1,2-phenylacetyl-CoA monooxygenase, subunit B)	95	ring 1,2-phenylacetyl-CoA epoxidase subunit	P76078
paaC	1	b1390	ECK120003304	1455164	1455910	forward			1,2-phenylacetyl-CoA epoxidase, subunit C (1,2-phenylacetyl-CoA epoxidase, structural subunit beta) (1,2-phenylacetyl-CoA monooxygenase, subunit C)	248	ring 1,2-phenylacetyl-CoA epoxidase, structural subunit	P76079
paaD	1	b1391	ECK120003305	1455925	1456422	forward			Putative 1,2-phenylacetyl-CoA epoxidase, subunit D (1,2-phenylacetyl-CoA monooxygenase, subunit D)	165	phenylacetate degradation protein	P76080
paaE	1	b1392	ECK120003306	1456430	1457500	forward			1,2-phenylacetyl-CoA epoxidase, subunit E (EC 1.-.-.-) (1,2-phenylacetyl-CoA epoxidase, reductase subunit) (1,2-phenylacetyl-CoA monooxygenase, subunit E)	356	ring 1,2-phenylacetyl-CoA epoxidase, reductase subunit	P76081
paaF	1	b1393	ECK120003307	1457497	1458264	forward			2,3-dehydroadipyl-CoA hydratase (EC 4.2.1.17) (Enoyl-CoA hydratase)	255	predicted 2,3-dehydroadipyl-CoA hydratase	P76082
paaG	1	b1394	ECK120003308	1458264	1459052	forward			1,2-epoxyphenylacetyl-CoA isomerase (EC 5.3.3.18)	262	predicted ring 1,2-epoxyphenylacetyl-CoA isomerase (oxepin-CoA forming)	P77467
paaH	1	b1395	ECK120003309	1459054	1460481	forward			3-hydroxyadipyl-CoA dehydrogenase (EC 1.1.1.-)	475	3-hydroxyadipyl-CoA dehydrogenase (NAD<sup>+</sup>)	P76083
paaI	1	b1396	ECK120003310	1460471	1460893	forward			Acyl-coenzyme A thioesterase PaaI (EC 3.1.2.-) (Phenylacetic acid degradation protein PaaI)	140	phenylacetyl-CoA thioesterase	P76084
paaJ	1	b1397	ECK120003311	1460893	1462098	forward			3-oxoadipyl-CoA/3-oxo-5,6-dehydrosuberyl-CoA thiolase (EC 2.3.1.174) (EC 2.3.1.223)	401	&beta;-ketoadipyl-CoA thiolase	P0C7L2
paaK	1	b1398	ECK120003312	1462125	1463438	forward			Phenylacetate-coenzyme A ligase (EC 6.2.1.30) (Phenylacetyl-CoA ligase) (PA-CoA ligase)	437	phenylacetate-CoA ligase	P76085
paaX	1	b1399	ECK120003313	1463539	1464489	forward			Transcriptional repressor PaaX	316	PaaX DNA-binding transcriptional repressor	P76086
paaY	1	b1400	ECK120003316	1464471	1465061	forward			Phenylacetic acid degradation protein PaaY	196	2-hydroxycyclohepta-1,4,6-triene-1-carboxyl-CoA thioesterase	P77181
ynbG	11	b4674	ECK120003567	1465165	1465230	reverse			Uncharacterized protein YnbG	21	small protein	C1P600
ydbA_1	1		ECK120048858	1465392	1467950	forward	Split gene (partner ydbA_2)	BioCyc: putative outer membrane protein, N-terminal fragment/ Uniprot full length is about 2000 AA	Putative exported protein YdbA	852	predicted outer membrane protein, N-ter fragment	P33666
insD-2	1	b1402	ECK120023918	1467921	1468826	reverse			Transposase InsD for insertion element IS2D	301		P0CF54
insC-2	1	b1403	ECK120003317	1468784	1469194	reverse			Transposase InsC for insertion element IS2D	136	IS2 insertion element repressor InsA	P0CF41
insI-2	1	b1404	ECK120003319	1469358	1470509	forward			Transposase InsI for insertion sequence element IS30C	383	transposase of IS30	P0CF89
ydbA_2	Split gene		ECK120002014	1470690	1474013	forward	Split gene (partner ydbA_1)	BioCyc: putative outer membrane protein, C-terminal fragment/ Uniprot full length is about 2000 AA		1107	predicted outer membrane protein, C-ter fragment
ydbC	1	b1406	ECK120004455	1474221	1475081	forward			Pyridoxine 4-dehydrogenase (EC 1.1.1.65)	286	predicted oxidoreductase, NAD(P)-binding	P25906
ydbD	1	b1407	ECK120001280	1475144	1477450	forward			Uncharacterized protein YdbD	768	protein involved in detoxification of methylglyoxal	P25907
ynbA	1	b1408	ECK120001281	1477621	1478226	forward			Inner membrane protein YnbA	201	predicted inner membrane protein	P76090
ynbB	1	b1409	ECK120003320	1478226	1479122	forward			Uncharacterized protein YnbB	298	predicted CDP-diglyceride synthase	P76091
ynbC	1	b1410	ECK120003321	1479138	1480895	forward			Uncharacterized protein YnbC	585	predicted hydrolase	P76092
ynbD	1	b1411	ECK120003322	1480909	1482201	forward			Uncharacterized protein YnbD	430	predicted phosphatase, inner membrane protein	P76093
azoR	1	b1412	ECK120003323	1482255	1482860	reverse			FMN-dependent NADH-azoreductase (EC 1.7.-.-) (Azo-dye reductase) (FMN-dependent NADH-azo compound oxidoreductase)	201	NADH:quinone oxidoreductase, FMN-dependent	P41407
hrpA	1	b1413	ECK120003324	1483061	1486963	forward			ATP-dependent RNA helicase HrpA (EC 3.6.4.13)	1300	ATP-dependent helicase	P43329
ydcF	1	b1414	ECK120003325	1487235	1488035	forward			Protein YdcF	266	conserved protein	P34209
aldA	1	b1415	ECK120002008	1488232	1489671	forward			Lactaldehyde dehydrogenase (EC 1.2.1.22) (Aldehyde dehydrogenase A) (Glycolaldehyde dehydrogenase) (EC 1.2.1.21)	479	aldehyde dehydrogenase A	P25553
gapC_2	Not in Uniprot		ECK120000032	1489713	1489964	reverse				83	glyceraldehyde 3-phosphate dehydrogenase C, interrupted
gapC_1	Not in Uniprot		ECK120003328	1489961	1490713	reverse				250	split glyceraldehyde 3-phosphate dehydrogenase C
cybB	1	b1418	ECK120000167	1490902	1491432	forward			Cytochrome b561 (Cytochrome b-561)	176	cytochrome b561	P0ABE5
ydcA	6	b1419	ECK120001198	1491677	1491850	forward			Uncharacterized protein YdcA	57	putative protein	P0ACW4
hokB	9	b4428	ECK120002662	1491922	1492071	reverse			Toxic protein HokB	49	toxin HokB	P77494
mokB	9	b1420	ECK120003326	1491962	1492129	reverse			Regulatory protein MokB	55	regulatory peptide whose translation enables hokB expression	P76096
trg	1	b1421	ECK120002663	1492470	1494110	forward			Methyl-accepting chemotaxis protein III (MCP-III) (Ribose and galactose chemoreceptor protein)	546		P05704
ydcI	1	b1422	ECK120001007	1494148	1495071	reverse			Uncharacterized HTH-type transcriptional regulator YdcI	307	YdcI DNA-binding transcriptional repressor	P77171
ydcJ	1	b1423	ECK120003327	1495288	1496631	forward			Uncharacterized protein YdcJ	447	conserved protein	P76097
opgD	1	b1424	ECK120002405	1496856	1498511	forward			Glucans biosynthesis protein D	551	glucan biosynthesis protein D	P40120
ydcH	5	b1426	ECK120003329	1498651	1498875	forward			Uncharacterized protein YdcH	74	putative protein	P0ACW6
rimL	1	b1427	ECK120002408	1498938	1499477	forward			Ribosomal-protein-serine acetyltransferase (EC 2.3.1.-) (Acetylating enzyme for N-terminal of ribosomal protein L7/L12)	179	ribosomal-protein-L12-serine acetyltransferase	P13857
ydcK	1	b1428	ECK120000844	1499469	1500449	reverse			Uncharacterized acetyltransferase YdcK (EC 2.3.1.-)	326	predicted enzyme	P76100
tehA	1	b1429	ECK120003330	1500573	1501565	forward			Tellurite resistance protein TehA	330	tellurite resistance protein / ethidium exporter	P25396
tehB	1	b1430	ECK120001813	1501562	1502155	forward			Tellurite methyltransferase (EC 2.1.1.265) (Chalcogen-detoxifying protein TehB) (Selenite methyltransferase) (Tellurite resistance protein TehB)	197	tellurite methyltransferase	P25397
ydcL	1	b1431	ECK120026449	1502457	1503125	forward			Uncharacterized lipoprotein YdcL	222	predicted lipoprotein	P64451
yncK_1	Not in Uniprot		ECK120003331	1503143	1503310	reverse		Ecoliwikinet: predicted transposase, N-ter fragment[3][2]; predicted transposase, C-ter fragment[		55	predicted transposase, N-ter fragment
yncK_2	Not in Uniprot		ECK120003335	1503362	1503649	reverse		Ecoliwikinet: predicted transposase, N-ter fragment[3][2]; predicted transposase, C-ter fragment[		95	predicted transposase, C-ter fragment
ydcM	1	b1432	ECK120026448	1503717	1504865	forward			Putative transposase InsQ for insertion sequence element IS609	382	predicted transposase	P76102
ydcO	1	b1433	ECK120003332	1504905	1506080	reverse			Inner membrane protein YdcO	391	putative transport protein, major facilitator superfamily (MFS)	P76103
sutR	1	b1434	ECK120003333	1506172	1506708	forward			HTH-type transcriptional regulator SutR (Sulfur utilization regulator)	178	SutR DNA-binding transcriptional dual regulator	P77626
ydcP	1	b1435	ECK120003334	1506781	1508742	forward			Uncharacterized protease YdcP (EC 3.4.-.-)	653	predicted peptidase	P76104
yncJ	9	b1436	ECK120003337	1508834	1509064	reverse			Uncharacterized protein YncJ	76	putative protein	P64459
hicA	5	b4532	ECK120003410	1509286	1509462	forward			Probable mRNA interferase toxin HicA (EC 3.1.-.-) (Endoribonuclease HicA) (Toxin HicA)	58	toxin of the HicA-HicB toxin-antitoxin system	P76106
hicB	1	b1438	ECK120016303	1509508	1509924	forward			Antitoxin HicB	138	antitoxin of the HicA-HicB toxin-antitoxin system	P67697
ydcR	1	b1439	ECK120003338	1510003	1511409	forward			Uncharacterized HTH-type transcriptional regulator YdcR	468	fused predicted DNA-binding transcriptional regulator and predicted amino transferase	P77730
ydcS	1	b1440	ECK120003339	1511654	1512799	forward			Putative ABC transporter periplasmic-binding protein YdcS	381	putative transport protein, ABC superfamily - periplasmic binding protein / polyhydroxybutyrate synthase	P76108
ydcT	1	b1441	ECK120003340	1512817	1513830	forward			Uncharacterized ABC transporter ATP-binding protein YdcT	337	putative transport protein, ABC superfamily - ATP binding component	P77795
ydcU	1	b1442	ECK120003341	1513831	1514772	forward			Inner membrane ABC transporter permease protein YdcU	313	putative transport protein, ABC superfamily - membrane component	P77156
ydcV	1	b1443	ECK120003342	1514762	1515556	forward			Inner membrane ABC transporter permease protein YdcV	264	putative transport protein, ABC family - membrane component	P0AFR9
patD	1	b1444	ECK120003344	1515578	1517002	forward			Gamma-aminobutyraldehyde dehydrogenase (EC 1.2.1.19) (1-pyrroline dehydrogenase) (4-aminobutanal dehydrogenase) (ABALDH)	474	&gamma;-aminobutyraldehyde dehydrogenase	P77674
yncL	5	b4598	ECK120001585	1517099	1517194	reverse			Uncharacterized protein YncL	31	small membrane protein	A5A615
ortT	5	b1445	ECK120002598	1517389	1517562	forward			Orphan toxin OrtT	57	orphan toxin	P64453
ydcY	1	b1446	ECK120003345	1517648	1517881	forward			Uncharacterized protein YdcY	77	putative protein	P64455
ydcZ	1	b1447	ECK120003346	1517882	1518331	reverse			Inner membrane protein YdcZ	149	predicted inner membrane protein	P76111
mnaT	1	b1448	ECK120003347	1518328	1518846	reverse			L-amino acid N-acyltransferase MnaT (EC 2.3.1.-) (L-methionine N-acyltransferase) (L-methionine sulfoximine/L-methionine sulfone N-acetyltransferase) (L-phenylglycine N-acetyltransferase)	172	L-amino acid N-acyltransferase	P76112
curA	1	b1449	ECK120003348	1519027	1520064	forward			NADPH-dependent curcumin reductase (EC 1.3.1.n3) (NADPH-dependent curcumin/dihydrocurcumin reductase)	345	NADPH-dependent curcumin/dihydrocurcumin reductase subunit	P76113
mcbR	1	b1450	ECK120003349	1520262	1520927	forward			HTH-type transcriptional regulator McbR	221	McbR DNA-binding transcriptional dual regulator	P76114
yncD	1	b1451	ECK120003350	1520963	1523065	reverse			Probable TonB-dependent receptor YncD	700	putative TonB-dependent outer membrane receptor	P76115
yncE	1	b1452	ECK120003351	1523307	1524368	forward			Uncharacterized protein YncE	353	conserved protein	P76116
ansP	1	b1453	ECK120003352	1524481	1525980	reverse			L-asparagine permease (L-asparagine transport protein)	499	L-asparagine transporter	P77610
yncG	1	b1454	ECK120003353	1526247	1526864	forward			Uncharacterized GST-like protein YncG	205	predicted enzyme	P76117
yncH	9	b1455	ECK120003355	1526940	1527152	forward			Uncharacterized protein YncH	70	hypothetical protein	P76118
rhsE	1		ECK120001206	1527890	1529938	forward			Putative protein RhsE	682	RhsE protein in rhs element	P24211
ydcD	9	b1457	ECK120000008	1529922	1530404	forward			Uncharacterized protein YdcD (ORF-E2)	160	hypothetical protein	P31991
yncI	1	b1458	ECK120001696	1530586	1531332	forward	Split gene (partner yncM)	Uniprot: sequence variants with frame shift - YncI is likely containing regulonDB yncI and yncM	Putative transposase YncI	248	putative protein	P76119
yncM	Split gene	b1459	ECK120003356	1531376	1531576	forward	Split gene (partner yncI)			66	putative protein
ydcC	1	b1460	ECK120003357	1531816	1532952	forward			H repeat-associated putative transposase YdcC (ORF-H)	378	conserved protein	P28917
pptA	1	b1461	ECK120001480	1533052	1533285	forward			Tautomerase PptA (EC 5.3.2.-)	77	probable 4-oxalocrotonate tautomerase (4-OT)	P31992
yddH	1	b1462	ECK120001697	1533282	1533851	reverse			Uncharacterized protein YddH	189	conserved protein	P76121
nhoA	1	b1463	ECK120003358	1534024	1534869	forward			N-hydroxyarylamine O-acetyltransferase (EC 2.3.1.118) (Arylamine N-acetyltransferase) (Arylhydroxamate N,O-acetyltransferase)	281	arylamine <i>N</i>-acetyltransferase	P77567
yddE	1	b1464	ECK120003359	1534965	1535858	reverse			Uncharacterized isomerase YddE (EC 5.1.-.-) (ORFB)	297	conserved protein	P37757
narV	1	b1465	ECK120001757	1535937	1536617	reverse			Respiratory nitrate reductase 2 gamma chain (EC 1.7.5.1)	226	nitrate reductase Z, &gamma; subunit	P0AF32
narW	1	b1466	ECK120000637	1536614	1537309	reverse			Probable nitrate reductase molybdenum cofactor assembly chaperone NarW (Redox enzyme maturation protein NarW)	231	NarW, probable private chaperone for NarZ nitrate reductase subunit	P19317
narY	1	b1467	ECK120000638	1537309	1538853	reverse			Respiratory nitrate reductase 2 beta chain (EC 1.7.5.1)	514	nitrate reductase Z, &beta; subunit	P19318
narZ	1	b1468	ECK120000640	1538850	1542590	reverse			Respiratory nitrate reductase 2 alpha chain (EC 1.7.5.1)	1246	nitrate reductase Z, &alpha; subunit	P19319
narU	1	b1469	ECK120000641	1542672	1544060	reverse			Nitrate/nitrite transporter NarU (Nitrite extrusion protein 2) (Nitrite facilitator 2)	462	nitrate / nitrite transporter NarU	P37758
yddJ	9	b1470	ECK120002052	1544384	1544719	reverse			Uncharacterized protein YddJ	111	hypothetical protein	P76122
yddK	1	b1471	ECK120003360	1544758	1545714	reverse			Putative uncharacterized protein YddK	318	putative protein	P76123
yddL	1	b1472	ECK120003361	1545738	1546028	reverse			Putative uncharacterized protein YddL	96	predicted lipoprotein	P77519
yddG	1	b1473	ECK120003362	1546288	1547169	reverse			Aromatic amino acid exporter YddG	293	aromatic amino acid exporter	P46136
fdnG	1	b1474	ECK120002370	1547401	1550448	forward			Formate dehydrogenase, nitrate-inducible, major subunit (EC 1.17.5.3) (Anaerobic formate dehydrogenase major subunit) (Formate dehydrogenase-N subunit alpha) (FDH-N subunit alpha)	1015	formate dehydrogenase N, &alpha; subunit	P24183
fdnH	1	b1475	ECK120001205	1550461	1551345	forward			Formate dehydrogenase, nitrate-inducible, iron-sulfur subunit (Anaerobic formate dehydrogenase iron-sulfur subunit) (Formate dehydrogenase-N subunit beta) (FDH-N subunit beta)	294	formate dehydrogenase N, &beta; subunit	P0AAJ3
fdnI	1	b1476	ECK120001207	1551338	1551991	forward			Formate dehydrogenase, nitrate-inducible, cytochrome b556(Fdn) subunit (Anaerobic formate dehydrogenase cytochrome b556 subunit) (Formate dehydrogenase-N subunit gamma) (FDH-N subunit gamma)	217	formate dehydrogenase N, &gamma; subunit	P0AEK7
yddM	1	b1477	ECK120002613	1552398	1552682	reverse			Uncharacterized HTH-type transcriptional regulator YddM	94	predicted DNA-binding transcriptional regulator	P67699
adhP	1	b1478	ECK120003363	1552828	1553838	reverse			Alcohol dehydrogenase, propanol-preferring (EC 1.1.1.1)	336	ethanol dehydrogenase / alcohol dehydrogenase	P39451
maeA	1	b1479	ECK120003364	1553972	1555669	reverse			NAD-dependent malic enzyme (NAD-ME) (EC 1.1.1.38)	565	malate dehydrogenase, NAD-requiring	P26616
sra	5	b1480	ECK120000937	1555826	1555963	reverse			Stationary-phase-induced ribosome-associated protein (Protein D) (SRA) (30S ribosomal protein S22)	45	30S ribosomal subunit protein S22	P68191
bdm	1	b1481	ECK120001464	1556065	1556280	reverse			Protein bdm (Biofilm-dependent modulation protein)	71	biofilm-dependent modulation protein	P76127
osmC	1	b1482	ECK120003365	1556625	1557056	forward			Peroxiredoxin OsmC (EC 1.11.1.15) (Osmotically-inducible protein C)	143	osmotically inducible peroxiredoxin	P0C0L2
ddpF	1	b1483	ECK120000673	1557112	1558038	reverse			Probable D,D-dipeptide transport ATP-binding protein DdpF	308	YddO	P77622
ddpD	1	b1484	ECK120003366	1558031	1559017	reverse			Probable D,D-dipeptide transport ATP-binding protein DdpD	328	YddP	P77268
ddpC	1	b1485	ECK120003367	1559014	1559910	reverse			Probable D,D-dipeptide transport system permease protein DdpC	298	YddQ	P77463
ddpB	1	b1486	ECK120003368	1559907	1560929	reverse			Probable D,D-dipeptide transport system permease protein DdpB	340	YddR	P77308
ddpA	1	b1487	ECK120003369	1560931	1562481	reverse			Probable D,D-dipeptide-binding periplasmic protein DdpA	516	YddS	P76128
ddpX	1	b1488	ECK120003370	1562495	1563076	reverse			D-alanyl-D-alanine dipeptidase (D-Ala-D-Ala dipeptidase) (EC 3.4.13.22)	193	D-Ala-D-Ala dipeptidase	P77790
dosP	1	b1489	ECK120003371	1563334	1565733	reverse			Oxygen sensor protein DosP (EC 3.1.4.52) (Direct oxygen-sensing phosphodiesterase) (Direct oxygen sensor protein) (Ec DOS) (Heme-regulated cyclic di-GMP phosphodiesterase)	799	c-di-GMP phosphodiesterase, heme-regulated	P76129
dosC	1	b1490	ECK120003372	1565758	1567140	reverse			Diguanylate cyclase DosC (DGC) (EC 2.7.7.65) (Direct oxygen-sensing cyclase)	460	diguanylate cyclase DosC	P0AA89	yes
yddW	1	b1491	ECK120003373	1567504	1568823	reverse			UPF0748 lipoprotein YddW	439	predicted lipoprotein	P64426
gadC	1	b1492	ECK120003374	1568954	1570489	reverse			Probable glutamate/gamma-aminobutyrate antiporter (Extreme acid sensitivity protein)	511	glutamic acid:4-aminobutyrate antiporter	P63235
gadB	1	b1493	ECK120003375	1570645	1572045	reverse			Glutamate decarboxylase beta (GAD-beta) (EC 4.1.1.15)	466	glutamate decarboxylase B subunit	P69910
pqqL	1	b1494	ECK120001446	1572407	1575202	reverse			Probable zinc protease PqqL (EC 3.4.24.-)	931	putative zinc peptidase	P31828
yddB	5	b1495	ECK120001683	1575247	1577619	reverse			Uncharacterized protein YddB (CDS103)	790	outer membrane protein, putative porin	P31827
yddA	1	b1496	ECK120001682	1577657	1579342	reverse			Inner membrane ABC transporter ATP-binding protein YddA (CDS102)	561	putative transport protein, ABC superfamily - fused membrane component, ATP-binding component	P31826
ydeM	1	b1497	ECK120001681	1579633	1580790	reverse			Anaerobic sulfatase-maturating enzyme homolog YdeM (AnSME homolog)	385	predicted anaerobic sulfatase maturation enzyme	P76134
ydeN	1	b1498	ECK120003376	1580842	1582524	reverse			Uncharacterized sulfatase YdeN (EC 3.1.6.-)	560	putative sulfatase	P77318
ydeO	4	b1499	ECK120003377	1582926	1583687	reverse			HTH-type transcriptional regulator YdeO	253	YdeO DNA-binding transcriptional dual regulator	P76135
safA	9	b1500	ECK120003378	1583762	1583959	reverse			Two-component-system connector protein SafA (Regulatory protein b1500) (Sensor associating factor A)	65	two-component system connector protein	P76136
ydeP	1	b1501	ECK120003379	1584207	1586486	reverse			Protein YdeP	759	acid resistance protein	P77561
ydeQ	1	b1502	ECK120003380	1586820	1587734	reverse			Uncharacterized fimbrial-like protein YdeQ	304	predicted fimbrial-like adhesin protein	P77588	yes
ydeR	1	b1503	ECK120003381	1587793	1588296	reverse			Uncharacterized fimbrial-like protein YdeR	167	predicted fimbrial-like adhesin protein	P77294	yes
ydeS	1	b1504	ECK120003382	1588309	1588839	reverse			Uncharacterized fimbrial-like protein YdeS	176	predicted fimbrial-like adhesin protein	P77789	yes
ydeT	1	b1505	ECK120003383	1588853	1590001	reverse			Putative uncharacterized protein ydet	382	putative protein	P76137
yneL	1	b1506	ECK120003384	1590357	1590536	reverse			Putative HTH-type transcriptional regulator YneL	59	predicted transcriptional regulator	P76138
hipA	1	b1507	ECK120003385	1590854	1592176	reverse			Serine/threonine-protein kinase toxin HipA (Ser/Thr-protein kinase HipA) (EC 2.7.11.1) (Toxin HipA)	440	serine/threonine kinase HipA	P23874	yes
hipB	1	b1508	ECK120003386	1592176	1592442	reverse			Antitoxin HipB	88	HipB antitoxin and DNA-binding transcriptional repressor	P23873
ydeU	1	b4696	ECK120000435	1592665	1594065	reverse			Uncharacterized protein YdeU	466	conserved protein	P77286
ydeK	1	b4696	ECK120001586	1594109	1598086	reverse			Uncharacterized lipoprotein YdeK (ORFT)	1325	predicted lipoprotein	P32051
lsrK	1	b1511	ECK120001714	1598617	1600209	reverse			Autoinducer-2 kinase (AI-2 kinase) (EC 2.7.1.189)	530	autoinducer-2 kinase	P77432	yes
lsrR	1	b1512	ECK120003387	1600288	1601241	reverse			Transcriptional regulator LsrR	317	LsrR DNA-binding transcriptional repressor	P76141
lsrA	1	b1513	ECK120003388	1601490	1603025	forward			Autoinducer 2 import ATP-binding protein LsrA (AI-2 import ATP-binding protein LsrA) (EC 3.6.3.-) (EGO10A)	511	AI-2 ABC transporter - ATP binding subunit	P77257
lsrC	1	b1514	ECK120003389	1603019	1604047	forward			Autoinducer 2 import system permease protein LsrC (AI-2 import system permease protein LsrC)	342	Autoinducer-2 ABC transporter - membrane subunit	P77672
lsrD	1	b1515	ECK120003390	1604047	1605039	forward			Autoinducer 2 import system permease protein LsrD (AI-2 import system permease protein LsrD)	330	Autoinducer-2 ABC transporter - membrane subunit	P0AFS1
lsrB	1	b1516	ECK120003391	1605051	1606073	forward			Autoinducer 2-binding protein LsrB (AI-2-binding protein LsrB)	340	autoinducer-2 ABC transporter - periplasmic binding protein	P76142
lsrF	1	b1517	ECK120003392	1606100	1606975	forward			3-hydroxy-5-phosphonooxypentane-2,4-dione thiolase (EC 2.3.1.245)	291	3-hydroxy-2,4-pentadione 5-phosphate thiolase	P76143
lsrG	1	b1518	ECK120003393	1606999	1607289	forward			(4S)-4-hydroxy-5-phosphonooxypentane-2,3-dione isomerase (EC 5.3.1.32) (Autoinducer 2-degrading protein LsrG) (AI-2-degrading protein LsrG) (Phospho-(S)-4,5-dihydroxy-2,3-pentanedione isomerase) (Phospho-AI-2 isomerase)	96	phospho-AI-2 isomerase	P64461
tam	1	b1519	ECK120003394	1607346	1608104	forward			Trans-aconitate 2-methyltransferase (EC 2.1.1.144)	252	<i>trans</i>-aconitate 2-methyltransferase	P76145
yneE	1	b1520	ECK120003395	1608108	1609022	reverse			UPF0187 protein YneE	304	conserved inner membrane protein	P76146
uxaB	1	b1521	ECK120003396	1609229	1610680	reverse			Altronate oxidoreductase (EC 1.1.1.58) (Tagaturonate dehydrogenase) (Tagaturonate reductase)	483	altronate oxidoreductase	P0A6L7
dgcF	1	b1522	ECK120001054	1610907	1611854	reverse			Probable diguanylate cyclase DgcF (DGC) (EC 2.7.7.65)	315	predicted diguanylate cyclase	P76147	yes
yneG	1	b1523	ECK120003397	1611966	1612325	reverse			Uncharacterized protein YneG	119	conserved protein	P76148
yneH	1	b1524	ECK120003398	1612325	1613251	reverse			Glutaminase 2 (EC 3.5.1.2)	308	glutaminase	P0A6W0
sad	1	b1525	ECK120003399	1613315	1614703	reverse			Succinate semialdehyde dehydrogenase [NAD(P)+] Sad (SSADH) (SSDH) (EC 1.2.1.16)	462	NAD<sup>+</sup>-dependent succinate semialdehyde dehydrogenase	P76149
yneJ	1	b1526	ECK120003400	1614804	1615685	forward			Uncharacterized HTH-type transcriptional regulator YneJ	293	predicted DNA-binding transcriptional regulator, LysR-type	P77309
yneK	5	b1527	ECK120003401	1615763	1616878	forward			Uncharacterized protein YneK	371	putative protein	P76150
ydeA	1	b1528	ECK120003402	1617028	1618218	forward			Sugar efflux transporter	396	arabinose exporter	P31122
marC	1	b1529	ECK120001583	1618243	1618908	reverse			UPF0056 inner membrane protein MarC	221	inner membrane protein MarC	P0AEY1
marR	1	b1530	ECK120001584	1619120	1619554	forward			Multiple antibiotic resistance protein MarR	144	MarR DNA-binding transcriptional repressor	P27245
marA	1	b1531	ECK120001399	1619574	1619957	forward			Multiple antibiotic resistance protein MarA	127	MarA DNA-binding transcriptional dual regulator	P0ACH5
marB	5	b1532	ECK120001398	1619989	1620207	forward			Multiple antibiotic resistance protein MarB	72	multiple antibiotic resistance protein	P31121
eamA	1	b1533	ECK120001547	1620238	1621137	reverse			Probable amino-acid metabolite efflux pump	299	<i>O</i>-acetylserine / cysteine exporter	P31125
ydeE	1	b1534	ECK120002603	1621332	1622519	forward			Uncharacterized MFS-type transporter YdeE	395	putative transport protein, major facilitator superfamily (MFS)	P31126
yneM	5	b4599	ECK125135295	1622646	1622741	forward			Uncharacterized protein YneM	31	small membrane protein	A5A616
dgcZ	1	b1535	ECK125095180	1622960	1623850	reverse			Diguanylate cyclase DgcZ (DGC) (EC 2.7.7.65) (Zinc-sensory diguanylate cyclase)	296	diguanylate cyclase	P31129	yes
ydeI	1	b1536	ECK120001587	1624105	1624497	reverse			Uncharacterized protein YdeI	130	stress response protein	P31130	yes
ydeJ	1	b1537	ECK120001588	1624773	1625291	forward			Protein YdeJ	172	conserved protein	P31131
dcp	1	b1538	ECK120001589	1625335	1627380	reverse			Dipeptidyl carboxypeptidase (EC 3.4.15.5) (Peptidyl-dipeptidase Dcp)	681	dipeptidyl carboxypeptidase II	P24171
ydfG	1	b1539	ECK120000206	1627517	1628263	forward			NADP-dependent 3-hydroxy acid dehydrogenase YdfG (L-allo-threonine dehydrogenase) (EC 1.1.1.381) (Malonic semialdehyde reductase) (EC 1.1.1.298)	248	3-hydroxy acid dehydrogenase	P39831
ydfH	1	b1540	ECK120002220	1628352	1629038	forward			HTH-type transcriptional repressor RspR	228	YdfH DNA-binding transcriptional repressor	P0ACM2
ydfZ	5	b1541	ECK120003403	1629215	1629418	forward			Putative selenoprotein YdfZ	67	conserved protein	P64463
ydfI	1	b1542	ECK120003404	1629453	1630913	reverse			Uncharacterized oxidoreductase YdfI (EC 1.-.-.-)	486	predicted mannonate dehydrogenase	P77260
ydfJ	1	b1543	ECK120003405	1631002	1632285	reverse			Putative inner membrane metabolite transport protein YdfJ	427	putative transport protein, major facilitator superfamily (MFS)	P77228		Qin
ydfK	9	b1544	ECK120003406	1633072	1633305	forward			Cold shock protein YdfK	77	Qin prophage; cold shock gene, predicted DNA-binding transcriptional regulator	P76154		Qin
pinQ	1	b1545	ECK120003407	1633622	1634212	forward			Serine recombinase PinQ (EC 3.1.22.-) (EC 6.5.1.-) (DNA-invertase PinQ) (Putative DNA-invertase from lambdoid prophage Qin) (Site-specific recombinase PinQ)	196	Qin prophage; predicted site-specific recombinase	P77170		Qin
tfaQ	1	b1546	ECK120003408	1634310	1634885	reverse			Prophage tail fiber assembly protein homolog TfaQ (Tail fiber assembly protein homolog from lambdoid prophage Qin)	191	Qin prophage; predicted tail fibre assembly protein	P76155		Qin
ydfN	1	b1547	ECK120003409	1634885	1635847	reverse			Prophage side tail fiber protein homolog StfQ (Side tail fiber protein homolog from lambdoid prophage Qin)	320	Qin prophage; predicted side tail fibre assembly protein	P77515		Qin
nohA	1	b1548	ECK120001581	1635798	1636367	reverse			Prophage DNA-packing protein NohA (Putative prophage Qin DNA-packaging protein Nu1 homolog)	189	Qin prophage; predicted packaging protein	P31061		Qin
ynfO	5	b4533	ECK120003514	1636756	1636989	forward			Uncharacterized protein YnfO (Uncharacterized protein YnfO from Qin prophage)	77	Qin prophage; predicted protein	Q2EES0		Qin
ydfO	5	b1549	ECK120016304	1637047	1637457	forward			Uncharacterized protein YdfO	136	Qin prophage; predicted protein	P76156		Qin
gnsB	9	b1550	ECK120003411	1637609	1637782	reverse			Protein GnsB	57	Qin prophage; predicted protein	P77695		Qin
ynfN	9	b1551	ECK120003412	1637954	1638109	reverse			Uncharacterized protein YnfN	51	Qin prophage; predicted protein	P76157		Qin
cspI	1	b1552	ECK120003413	1638455	1638667	reverse			Cold shock-like protein CspI (CPS-I)	70	Qin prophage; cold shock protein	P0A986		Qin
rzpQ	9	b1553	ECK120003415	1639030	1639527	reverse			Uncharacterized protein RzpQ	165	Qin prophage; conserved protein	P76158		Qin
rzoQ	9	b4689	ECK120002751	1639080	1639334	reverse			Putative lipoprotein RzoQ	84	putative lipoprotein RzoQ	C1P601		(Qin)
rrrQ	1	b1554	ECK125240988	1639524	1640057	reverse			Probable prophage lysozyme (EC 3.2.1.17) (Endolysin) (Lysis protein) (Muramidase) (Probable lysozyme from lambdoid prophage Qin)	177	Qin prophage; predicted lysozyme	P76159		(Qin)
ydfR	9	b1555	ECK120003416	1640054	1640365	reverse			Uncharacterized protein YdfR	103	Qin prophage; predicted protein	P76160		Qin
essQ	5	b1556	ECK120003417	1640370	1640585	reverse			Prophage lysis protein S homolog EssQ (Lysis protein S homolog from lambdoid prophage Qin)	71	Qin prophage; predicted S lysis protein	P77237		Qin
cspB	1	b1557	ECK120003418	1641339	1641554	reverse			Cold shock-like protein CspB (CSP-B)	71	Qin prophage; cold shock protein; predicted DNA-binding transcriptional regulator	P36995		Qin
cspF	1	b1558	ECK120002091	1641855	1642067	forward			Cold shock-like protein CspF (CSP-F)	70	Qin prophage; cold shock protein	P0A976		Qin
ydfT	1	b1559	ECK120002093	1642489	1643241	reverse			Prophage antitermination protein Q homolog QuuQ (Antitermination protein Q homolog from lambdoid prophage Qin)	250	Qin prophage; predicted antitermination protein Q	P76161		(Qin)
ydfU	1	b1560	ECK120003419	1643255	1644304	reverse			Uncharacterized protein YdfU	349	Qin prophage; predicted protein	P76162		Qin
rem	9	b1561	ECK120003420	1644651	1644902	reverse			Uncharacterized protein Rem	83	Qin prophage; predicted protein	P07010		Qin
hokD	2	b1562	ECK120001113	1645119	1645274	reverse			Toxic protein HokD (Protein RelF)	51	Qin prophage; small toxic polypeptide	P0ACG6		Qin
relE	1	b1563	ECK120001114	1645346	1645633	reverse			mRNA interferase toxin RelE (EC 3.1.-.-) (Endoribonuclease RelE) (Toxin RelE)	95	Qin prophage / toxin of the RelE-RelB toxin-antitoxin system / cofactor to enhance the repressor activity of RelB	P0C077		Qin
relB	4	b1564	ECK120001115	1645633	1645872	reverse			Antitoxin RelB	79	RelB Qin prophage; antitoxin of the RelE-RelB toxin-antitoxin system and DNA binding transcriptional repressor	P0C079		Qin
ydfV	9	b1565	ECK120000827	1645897	1646202	forward			Uncharacterized protein YdfV	101	Qin prophage; predicted protein	P76163		Qin
flxA	9	b1566	ECK120003421	1646405	1646737	forward			Protein FlxA	110	Qin prophage; predicted protein	P77609		Qin
ydfW	9	b1567	ECK120003422	1647174	1647323	reverse			Uncharacterized protein YdfW (Uncharacterized protein YdfW in Qin prophage region)	49	Qin prophage; predicted protein	P76164		Qin
ydfX	9	b1568	ECK120003423	1647346	1647636	reverse			Uncharacterized protein YdfX	96	Qin prophage; predicted protein	P76165		Qin
dicC	6	b1569	ECK120003424	1647620	1647850	reverse			Repressor protein of division inhibition gene dicB	76	Qin prophage; DNA-binding transcriptional regulator for DicB	P06965		Qin
dicA	1	b1570	ECK120000222	1647934	1648341	forward			HTH-type transcriptional regulator DicA (Repressor protein of division inhibition gene dicA)	135	DicA DNA-binding transcriptional dual regulator	P06966		Qin
ydfA	9	b1571	ECK120000220	1648508	1648663	forward			Uncharacterized protein YdfA	51	Qin prophage; predicted protein	P0ACW8		Qin
ydfB	9	b1572	ECK120001273	1648665	1648793	forward			Uncharacterized protein YdfB	42	Qin prophage; small protein	P29009		Qin
ydfC	9	b1573	ECK120001274	1648823	1649041	forward			Uncharacterized protein YdfC	72	Qin prophage; predicted protein	P21418		Qin
dicB	9	b1575	ECK120002557	1649609	1649797	forward			Division inhibition protein DicB	62	Qin prophage; cell division inhibition protein DicB	P09557		Qin
ydfD	5	b1576	ECK120000221	1649794	1649985	forward			Uncharacterized protein YdfD	63	Qin prophage; lysis protein	P29010		Qin
ydfE	9	b1577	ECK120001276	1650078	1650998	forward			Putative uncharacterized protein YdfE (ORF6)	306	Qin prophage; predicted protein	Q47138		Qin
insD	1	b1578	ECK120001277	1650881	1651537	forward			Putative transposase InsD for insertion element IS2E	218	Qin prophage; predicted transposase	P0CF60		(Qin)
intQ	1	b1579	ECK120003426	1651512	1652708	forward			Putative defective protein IntQ (Putative lambdoid prophage Qin defective integrase)	398	Qin prophage; predicted defective integrase	P76168		Qin
ynfP	Not in Uniprot		ECK120003442	1652728	1652838	reverse				36	putative protein
rspB	1	b1580	ECK120026450	1652896	1653915	reverse			Starvation-sensing protein RspB (EC 1.1.1.-)	339	predicted oxidoreductase, Zn-dependent and NAD(P)-binding	P38105
rspA	1	b1581	ECK120003427	1653927	1655141	reverse			Starvation-sensing protein RspA	404	mannonate/altronate dehydratase	P38104
ynfA	1	b1582	ECK120003428	1655347	1655673	reverse			UPF0060 membrane protein YnfA	108	conserved inner membrane protein	P76169
ynfB	1	b1583	ECK120003429	1655808	1656149	forward			UPF0482 protein YnfB	113	putative protein	P76170
speG	1	b1584	ECK120003430	1656184	1656744	forward			Spermidine N(1)-acetyltransferase (SAT) (EC 2.3.1.57) (Spermidine/spermine N(1)-acetyltransferase) (SSAT)	186	spermidine acetyltransferase	P0A951
ynfC	1	b1585	ECK120003431	1656747	1657457	reverse			UPF0257 lipoprotein YnfC	236	YnfC lipoprotein	P67553
ynfD	2	b1586	ECK120003432	1657565	1657870	forward			Uncharacterized protein YnfD	101	putative protein	P76172
ynfE	1	b1587	ECK120003433	1658069	1660495	forward			Putative dimethyl sulfoxide reductase chain YnfE (DMSO reductase) (EC 1.8.99.-)	808	putative selenate reductase, oxidoreductase subunit	P77374
ynfF	1	b1588	ECK120003434	1660556	1662979	forward			Probable dimethyl sulfoxide reductase chain YnfF (DMSO reductase) (EC 1.8.99.-)	807	putative selenate reductase, oxidoreductase subunit	P77783
ynfG	1	b1589	ECK120003435	1662990	1663607	forward			Probable anaerobic dimethyl sulfoxide reductase chain YnfG (DMSO reductase iron-sulfur subunit YnfG)	205	putative selenate reductase, predicted Fe-S subunit	P0AAJ1
ynfH	1	b1590	ECK120003436	1663609	1664463	forward			Anaerobic dimethyl sulfoxide reductase chain YnfH (DMSO reductase anchor subunit YnfH)	284	putative selenate reductase, predicted membrane anchor subunit	P76173
dmsD	1	b1591	ECK120003437	1664506	1665120	forward			Tat proofreading chaperone DmsD (DMSO reductase maturation protein) (Twin-arginine leader-binding protein DmsD)	204	DMS reductase maturation protein	P69853
clcB	1	b1592	ECK120003438	1665315	1666571	forward			Voltage-gated ClC-type chloride channel ClcB	418		P76175
ynfK	1	b1593	ECK120003439	1666524	1667219	reverse			ATP-dependent dethiobiotin synthetase BioD 2 (EC 6.3.3.3) (DTB synthetase 2) (DTBS 2) (Dethiobiotin synthase 2)	231	predicted dethiobiotin synthetase	P0A6E9
mlc	1	b1594	ECK120003440	1667344	1668564	reverse			Protein mlc (Making large colonies protein)	406	Mlc DNA-binding transcriptional repressor	P50456
ynfL	1	b1595	ECK120003441	1668699	1669592	reverse			Uncharacterized HTH-type transcriptional regulator YnfL	297	predicted DNA-binding transcriptional regulator	P77559
ynfM	1	b1596	ECK120003443	1669699	1670952	forward			Inner membrane transport protein YnfM	417	putative transport protein, major facilitator superfamily	P43531
asr	No age assigned	b1597	ECK120003444	1671376	1671684	forward			Acid shock protein	102	acid shock protein	P36560
ydgU	No age assigned	b4601	ECK120000943	1671777	1671860	forward			Uncharacterized protein YdgU	27	small predicted membrane protein	A5A617
ydgD	1	b1598	ECK120030077	1671960	1672781	forward			Uncharacterized serine protease YdgD (EC 3.4.21.-)	273	predicted peptidase	P76176
mdtI	1	b1599	ECK120003445	1672820	1673149	reverse			Spermidine export protein MdtI	109	multidrug / spermidine efflux pump - membrane subunit MdtI	P69210
mdtJ	1	b1600	ECK120003446	1673136	1673501	reverse			Spermidine export protein MdtJ	121	multidrug / spermidine efflux pump - membrane subunit MdtJ	P69212
tqsA	1	b1601	ECK120003447	1673913	1674947	forward			AI-2 transport protein TqsA (Transport of quorum-sensing signal protein)	344	quorum signal AI-2 exporter	P0AFS5
pntB	1	b1602	ECK120003448	1674972	1676360	reverse			NAD(P) transhydrogenase subunit beta (EC 1.6.1.2) (Nicotinamide nucleotide transhydrogenase subunit beta) (Pyridine nucleotide transhydrogenase subunit beta)	462	pyridine nucleotide transhydrogenase, &beta; subunit	P0AB67
pntA	1	b1603	ECK120000736	1676371	1677903	reverse			NAD(P) transhydrogenase subunit alpha (EC 1.6.1.2) (Nicotinamide nucleotide transhydrogenase subunit alpha) (Pyridine nucleotide transhydrogenase subunit alpha)	510	pyridine nucleotide transhydrogenase, &alpha; subunit	P07001
ydgH	1	b1604	ECK120000735	1678427	1679371	forward			Protein YdgH	314	putative protein	P76177
ydgI	1	b1605	ECK120003449	1679557	1680939	forward			Putative arginine/ornithine antiporter	460	predicted inner membrane transport protein	P0AAE5
folM	1	b1606	ECK120003450	1680976	1681698	forward			Dihydromonapterin reductase (H(2)-MPt reductase) (EC 1.5.1.-) (Dihydrofolate reductase) (DHFR) (EC 1.5.1.3)	240	dihydromonapterin reductase/dihydrofolate reductase	P0AFS3
ydgC	2	b1607	ECK120003451	1681695	1682030	reverse			Inner membrane protein YdgC	111	hypothetical protein	P0ACX0
rstA	1	b1608	ECK120003452	1682159	1682878	forward			Transcriptional regulatory protein RstA	239	RstA transcriptional regulator	P52108
rstB	1	b1609	ECK120003453	1682882	1684183	forward			Sensor protein RstB (EC 2.7.13.3)	433	RstB sensory histidine kinase	P18392
tus	1	b1610	ECK120001211	1684259	1685188	forward			DNA replication terminus site-binding protein (Ter-binding protein)	309	DNA-binding protein; inhibition of replication at Ter sites	P16525
fumC	1	b1611	ECK120001027	1685185	1686588	reverse			Fumarate hydratase class II (Fumarase C) (EC 4.2.1.2) (Aerobic fumarase) (Iron-independent fumarase)	467	fumarase C	P05042
fumA	1	b1612	ECK120000351	1686731	1688377	reverse			Fumarate hydratase class I, aerobic (EC 4.2.1.2) (Fumarase A) (Oxaloacetate keto--enol-isomerase) (OAAKE isomerase) (Oxaloacetate tautomerase) (EC 5.3.2.2)	548	fumarase A	P0AC33
manA	1	b1613	ECK120000349	1688576	1689751	forward			Mannose-6-phosphate isomerase (EC 5.3.1.8) (Phosphohexomutase) (Phosphomannose isomerase) (PMI)	391	mannose-6-phosphate isomerase	P00946
ydgA	1	b1614	ECK120000559	1689852	1691360	forward			Protein YdgA	502	conserved protein	P77804
uidC	7	b1615	ECK120003454	1691586	1692851	reverse			Membrane-associated protein UidC	421	outer membrane-associated protein	Q47706
uidB	1	b1616	ECK120003455	1692890	1694263	reverse			Glucuronide carrier protein homolog	457	glucuronide:H<sup>+</sup> symporter	P0CE44
uidA	1	b1617	ECK120001601	1694260	1696071	reverse			Beta-glucuronidase (GUS) (EC 3.2.1.31) (Beta-D-glucuronoside glucuronosohydrolase)	603	&beta;-D-glucuronidase	P05804
uidR	1	b1618	ECK120001044	1696462	1697052	reverse			HTH-type transcriptional regulator UidR (Gus operon repressor) (Uid operon repressor)	196	UidR DNA-binding transcriptional repressor	P0ACT6
hdhA	1	b1619	ECK120003456	1697273	1698040	reverse			7-alpha-hydroxysteroid dehydrogenase (7-alpha-HSDH) (EC 1.1.1.159)	255	7-&alpha;-hydroxysteroid dehydrogenase	P0AET8
malI	1	b1620	ECK120000418	1698152	1699180	reverse			Maltose regulon regulatory protein MalI	342	MalI DNA-binding transcriptional repressor	P18811
malX	1	b1621	ECK120000550	1699355	1700947	forward			PTS system maltose-specific EIICB component [Includes: Maltose permease IIC component (PTS system maltose-specific EIIC component); Maltose-specific phosphotransferase enzyme IIB component (EC 2.7.1.208) (PTS system maltose-specific EIIB component)]	530	MalX PTS permease	P19642
malY	1	b1622	ECK120000556	1700957	1702129	forward			Protein MalY [Includes: Cystathionine beta-lyase MalY (CBL) (EC 4.4.1.8) (Beta-cystathionase) (Cysteine lyase); Maltose regulon modulator]	390	bifunctional &beta;-cystathionase, PLP-dependent and regulator of maltose regulon	P23256
add	1	b1623	ECK120000557	1702233	1703234	forward			Adenosine deaminase (EC 3.5.4.4) (Adenosine aminohydrolase)	333	adenosine deaminase	P22333
ydgJ	1	b1624	ECK120003457	1703268	1704308	reverse			Uncharacterized oxidoreductase YdgJ (EC 1.-.-.-)	346	predicted oxidoreductase	P77376
blr	9	b4409	ECK120004332	1704551	1704676	forward			Divisome-associated membrane protein Blr (Beta-lactam resistance protein)	41	&beta;-lactam resistance protein	P56976
cnu	2	b1625	ECK120002650	1704949	1705164	forward			OriC-binding nucleoid-associated protein (H-NS/StpA-binding protein 2) (Transcription modulator YdgT)	71	H-NS- and StpA-binding protein	P64467	yes
ydgK	2	b1626	ECK120003458	1705250	1705690	forward			Inner membrane protein YdgK	146	conserved inner membrane protein	P76180
rsxA	1	b1627	ECK120003459	1705767	1706348	forward			Ion-translocating oxidoreductase complex subunit A (EC 1.18.1.-) (Rsx electron transport complex subunit A)	193	integral membrane protein of SoxR-reducing complex	P0A766
rsxB	1	b1628	ECK120003460	1706348	1706926	forward			Ion-translocating oxidoreductase complex subunit B (EC 1.18.1.-) (Rsx electron transport complex subunit B)	192	member of SoxR-reducing complex	P77223
rsxC	1	b1629	ECK120003461	1706919	1709141	forward			Ion-translocating oxidoreductase complex subunit C (EC 1.18.1.-) (Rsx electron transport complex subunit C)	740	member of SoxR-reducing complex	P77611
rsxD	1	b1630	ECK120003462	1709142	1710200	forward			Ion-translocating oxidoreductase complex subunit D (EC 1.18.1.-) (Rsx electron transport complex subunit D)	352	integral membrane protein of SoxR-reducing complex	P76182
rsxG	1	b1631	ECK120003463	1710204	1710824	forward			Ion-translocating oxidoreductase complex subunit G (EC 1.18.1.-) (Rsx electron transport complex subunit G)	206	member of SoxR-reducing complex	P77285
rsxE	1	b1632	ECK120003464	1710828	1711523	forward			Ion-translocating oxidoreductase complex subunit E (EC 1.18.1.-) (Rsx electron transport complex subunit E)	231	integral membrane protein of SoxR-reducing complex	P77179
nth	1	b1633	ECK120003465	1711523	1712158	forward			Endonuclease III (EC 4.2.99.18) (DNA-(apurinic or apyrimidinic site) lyase)	211	endonuclease III	P0AB83
dtpA	1	b1634	ECK120000655	1712769	1714271	forward			Dipeptide and tripeptide permease A	500	tripeptide / dipeptide:H<sup>+</sup> symporter DtpA	P77304
gstA	1	b1635	ECK120003466	1714377	1714982	forward			Glutathione S-transferase GstA (EC 2.5.1.18) (GST B1-1)	201	glutathione S-transferase	P0A9D2
pdxY	1	b1636	ECK120003467	1715026	1715889	reverse			Pyridoxal kinase PdxY (PL kinase) (EC 2.7.1.35) (Pyridoxal kinase 2) (PL kinase 2)	287	pyridoxal kinase 2	P77150
tyrS	1	b1637	ECK120003468	1715948	1717222	reverse			Tyrosine--tRNA ligase (EC 6.1.1.1) (Tyrosyl-tRNA synthetase) (TyrRS)	424	tyrosine-tRNA ligase	P0AGJ9
pdxH	1	b1638	ECK120001032	1717351	1718007	reverse			Pyridoxine/pyridoxamine 5'-phosphate oxidase (EC 1.4.3.5) (PNP/PMP oxidase) (PNPOx) (Pyridoxal 5'-phosphate synthase)	218	pyridoxine 5'-phosphate oxidase / pyridoxamine 5'-phosphate oxidase	P0AFI7
mliC	1	b1639	ECK120001443	1718066	1718395	reverse			Membrane-bound lysozyme inhibitor of C-type lysozyme	109	inhibitor of c-type lysozyme, predicted lipoprotein	P28224
anmK	1	b1640	ECK120001444	1718493	1719602	reverse			Anhydro-N-acetylmuramic acid kinase (EC 2.7.1.170) (AnhMurNAc kinase)	369	anhydro-<i>N</i>-acetylmuramic acid kinase	P77570
slyB	2	b1641	ECK120003469	1719876	1720343	forward			Outer membrane lipoprotein SlyB	155	outer membrane lipoprotein	P0A905
slyA	1	b1642	ECK120003470	1720390	1720824	reverse			Transcriptional regulator SlyA	144	SlyA DNA-binding transcriptional activator	P0A8W2
ydhI	2	b1643	ECK120003471	1721025	1721261	forward			Uncharacterized protein YdhI	78	predicted inner membrane protein	P64471
ydhJ	1	b1644	ECK120003472	1721264	1722121	forward			Uncharacterized protein YdhJ	285	inner membrane protein YdhJ	P76185
ydhK	1	b1645	ECK120003473	1722121	1724133	forward			Uncharacterized transporter YdhK	670	inner membrane protein YdhK	P76186
sodC	1	b1646	ECK120003474	1724134	1724655	reverse			Superoxide dismutase [Cu-Zn] (EC 1.15.1.1) (Bacteriocuprein)	173	superoxide dismutase (Cu-Zn)	P0AGD1
ydhF	1	b1647	ECK120003475	1724736	1725632	reverse			Oxidoreductase YdhF (EC 1.-.-.-)	298	predicted oxidoreductase	P76187
ydhL	2	b1648	ECK120003476	1725681	1725920	reverse			Uncharacterized protein YdhL	79	conserved protein	P64474
nemR	1	b1649	ECK120003477	1726023	1726622	forward			HTH-type transcriptional repressor NemR	199	NemR DNA-binding transcriptional repressor	P67430
nemA	1	b1650	ECK120003478	1726659	1727756	forward			N-ethylmaleimide reductase (EC 1.-.-.-) (N-ethylmaleimide reducing enzyme)	365	N-ethylmaleimide reductase, FMN-linked	P77258
gloA	1	b1651	ECK120003479	1727837	1728244	forward			Lactoylglutathione lyase (EC 4.4.1.5) (Aldoketomutase) (Glyoxalase I) (Glx I) (Ketone-aldehyde mutase) (Methylglyoxalase) (S-D-lactoylglutathione methylglyoxal lyase)	135	glyoxalase I	P0AC81
rnt	1	b1652	ECK120003480	1728347	1728994	forward			Ribonuclease T (EC 3.1.13.-) (Exoribonuclease T) (RNase T)	215	RNase T	P30014
lhr	1	b1653	ECK120001501	1729087	1733703	forward			Probable ATP-dependent helicase lhr (EC 3.6.4.-) (Large helicase-related protein)	1538	member of ATP-dependent helicase superfamily II	P30015
grxD	1	b1654	ECK120001502	1733754	1734101	reverse			Glutaredoxin 4 (Grx4) (Monothiol glutaredoxin)	115	glutaredoxin 4	P0AC69
mepH	1	b1655	ECK120002074	1734435	1735250	forward			Murein DD-endopeptidase MepH (EC 3.4.-.-) (Murein hydrolase MepH)	271	murein DD-endopeptidase MepH	P76190
sodB	1	b1656	ECK120003481	1735378	1735959	forward			Superoxide dismutase [Fe] (EC 1.15.1.1)	193	superoxide dismutase (Fe)	P0AGD3
ydhP	1	b1657	ECK120003482	1736121	1737290	reverse			Inner membrane transport protein YdhP	389	putative transport protein - major facilitator superfamily	P77389
ynhF	5	b4602	ECK120002368	1737456	1737545	reverse			Uncharacterized protein YnhF	29	small stress response membrane protein	A5A618
purR	1	b1658	ECK120030078	1737844	1738869	forward			HTH-type transcriptional repressor PurR (Pur regulon repressor) (Purine nucleotide synthesis repressor)	341	PurR transcriptional repressor	P0ACP7
ydhB	1	b1659	ECK120000791	1738866	1739798	reverse			Uncharacterized HTH-type transcriptional regulator YdhB	310	protein with similarity to transcriptional regulators	P0ACR2
ydhC	1	b1660	ECK120002041	1739911	1741122	forward			Inner membrane transport protein YdhC	403	putative transport protein, major facilitator superfamily (MFS)	P37597
cfa	1	b1661	ECK120002042	1741413	1742561	forward			Cyclopropane-fatty-acyl-phospholipid synthase (CFA synthase) (Cyclopropane fatty acid synthase) (EC 2.1.1.79)	382	cyclopropane fatty acyl phospholipid synthase	P0A9H7
ribC	1	b1662	ECK120001485	1742601	1743242	reverse			Riboflavin synthase (RS) (EC 2.5.1.9)	213	riboflavin synthase	P0AFU8
mdtK	1	b1663	ECK120001372	1743457	1744830	forward			Multidrug resistance protein MdtK (Multidrug-efflux transporter)	457	multidrug efflux pump	P37340
ydhQ	6	b1664	ECK120002262	1744871	1746127	reverse			Uncharacterized protein YdhQ	418	conserved protein	P77552
ydhR	1	b1667	ECK120002554	1746700	1747005	forward			Putative monooxygenase YdhR (EC 1.-.-.-)	101	predicted monooxygenase	P0ACX3
ydhS	1	b1668	ECK120003484	1747131	1748735	forward			Uncharacterized protein YdhS	534	conserved protein with FAD/NAD(P)-binding domain	P77148
ydhT	1	b1669	ECK120003485	1748747	1749559	reverse			Uncharacterized protein YdhT	270	conserved protein	P77147
ydhU	5	b1670	ECK120003486	1749563	1750348	reverse			Putative cytochrome YdhU (Protein PhsC homolog)	261	predicted cytochrome	P77409
ydhX	1	b1671	ECK120003487	1750345	1751013	reverse			Uncharacterized ferredoxin-like protein YdhX	222	predicted 4Fe-4S ferredoxin-type protein	P77375
ydhW	1	b1672	ECK120003488	1751077	1751724	reverse			Uncharacterized protein YdhW	215	putative protein	P77564
ydhV	1	b1673	ECK120003489	1751728	1753830	reverse			Uncharacterized oxidoreductase YdhV (EC 1.-.-.-)	700	predicted oxidoreductase	P76192
ydhY	1	b1674	ECK120003490	1753851	1754477	reverse			Uncharacterized ferredoxin-like protein YdhY	208	predicted 4Fe-4S ferredoxin-type protein	P0AAL6
ydhZ	5	b1675	ECK120003491	1754932	1755141	reverse			Fumarase D (EC 4.2.1.2)	69	putative protein	P0ACX5
pykF	1	b1676	ECK120003492	1755698	1757110	forward			Pyruvate kinase I (EC 2.7.1.40) (PK-1)	470	pyruvate kinase I	P0AD61
lpp	1	b1677	ECK120000795	1757421	1757657	forward			Major outer membrane prolipoprotein Lpp [Cleaved into: Major outer membrane lipoprotein Lpp (Braun lipoprotein) (Murein-lipoprotein)]	78	murein lipoprotein	P69776
ldtE	1	b1678	ECK120000537	1757721	1758725	reverse			Probable L,D-transpeptidase YnhG (EC 2.-.-.-)	334	L,D-transpeptidase LdtE	P76193
sufE	1	b1679	ECK120003493	1758874	1759290	reverse			Cysteine desulfuration protein SufE	138	sulfur acceptor for SufS cysteine desulfurase	P76194
sufS	1	b1680	ECK120003494	1759303	1760523	reverse			Cysteine desulfurase (EC 2.8.1.7) (Selenocysteine beta-lyase) (SCL) (Selenocysteine lyase) (EC 4.4.1.16) (Selenocysteine reductase)	406	L-cysteine desulfurase	P77444
sufD	1	b1681	ECK120003495	1760520	1761791	reverse			FeS cluster assembly protein SufD	423	SufD component of SufBCD Fe-S cluster scaffold complex	P77689
sufC	1	b1682	ECK120003496	1761766	1762512	reverse			Probable ATP-dependent transporter SufC	248	SufC component of SufBCD Fe-S cluster scaffold complex	P77499
sufB	1	b1683	ECK120003497	1762522	1764009	reverse			FeS cluster assembly protein SufB	495	SufB component of SufBCD Fe-S cluster scaffold complex	P77522
sufA	1	b1684	ECK120001346	1764018	1764386	reverse			Protein SufA	122	Fe-S transport protein in Fe-S cluster assembly	P77667
ydiH	5	b1685	ECK120002588	1764934	1765122	reverse			Uncharacterized protein YdiH	62	putative protein	P64476
menI	1	b1686	ECK120003499	1765222	1765632	reverse			1,4-dihydroxy-2-naphthoyl-CoA hydrolase (DHNA-CoA hydrolase) (EC 3.1.2.28) (DHNA-CoA thioesterase)	136	1,4-dihydroxy-2-naphthoyl-CoA thioesterase	P77781
ydiJ	1	b1687	ECK120003500	1765629	1768685	reverse			Uncharacterized protein YdiJ	1018	predicted FAD-linked oxidoreductase	P77748
ydiK	1	b1688	ECK120003502	1769074	1770186	forward			Putative transport protein YdiK	370	inner membrane protein YdiK	P0AFS7
ydiL	7	b1689	ECK120002576	1770615	1770971	forward			Uncharacterized protein YdiL	118	conserved protein	P76196
ydiM	1	b1690	ECK120003503	1771071	1772285	forward			Inner membrane transport protein YdiM	404	putative transport protein, major facilitator superfamily	P76197
ydiN	1	b1691	ECK120003504	1772512	1773777	forward			Inner membrane transport protein YdiN	421	putative transport protein, major facilitator superfamily	P76198
ydiB	1	b1692	ECK120003505	1773789	1774655	forward			Quinate/shikimate dehydrogenase (EC 1.1.1.282) (NAD-dependent shikimate 5-dehydrogenase)	288	shikimate dehydrogenase / quinate dehydrogenase	P0A6D5
aroD	1	b1693	ECK120001212	1774686	1775444	forward			3-dehydroquinate dehydratase (3-dehydroquinase) (EC 4.2.1.10) (Type I DHQase) (Type I dehydroquinase) (DHQ1)	252	3-dehydroquinate dehydratase	P05194
ydiF	1	b1694	ECK120000072	1775587	1777182	forward			Acetate CoA-transferase YdiF (EC 2.8.3.8) (Short-chain acyl-CoA:acetate CoA-transferase)	531	fused predicted acetyl-CoA:acetoacetyl-CoA transferase: &alpha; subunit/&beta; subunit	P37766
ydiO	1	b1695	ECK120002287	1777196	1778347	forward			Probable acyl-CoA dehydrogenase YdiO (EC 1.3.-.-)	383	predicted enoyl-CoA reductase	P0A9U8
ydiP	1	b1696	ECK120003506	1778390	1779301	reverse			Uncharacterized HTH-type transcriptional regulator YdiP	303	predicted DNA-binding transcriptional regulator	P77402
ydiQ	1	b1697	ECK120003507	1779617	1780381	forward			Putative electron transfer flavoprotein subunit YdiQ	254	conserved protein	P76201
ydiR	1	b1698	ECK120003508	1780401	1781339	forward			Putative electron transfer flavoprotein subunit YdiR	312	predicted electron transport flavoprotein, FAD-binding	P77378
ydiS	1	b1699	ECK120003509	1781395	1782684	forward			Probable electron transfer flavoprotein-quinone oxidoreductase YdiS (EC 1.5.5.-)	429	predicted oxidoreductase with FAD/NAD(P)-binding domain	P77337
ydiT	1	b1700	ECK120003510	1782681	1782974	forward			Ferredoxin-like protein YdiT	97	predicted 4Fe-4S ferredoxin-type protein	P77714
fadK	1	b1701	ECK120003511	1782977	1784677	forward			Medium-chain fatty-acid--CoA ligase (EC 6.2.1.-) (Acyl-CoA synthetase) (ACS) (Fatty acyl-CoA synthetase FadK)	566	short chain acyl-CoA synthetase	P38135
ppsA	1	b1702	ECK120002225	1784734	1787112	reverse			Phosphoenolpyruvate synthase (PEP synthase) (EC 2.7.9.2) (Pyruvate, water dikinase)	792	phosphoenolpyruvate synthetase	P23538
ppsR	1	b1703	ECK120000750	1787445	1788278	forward			Phosphoenolpyruvate synthase regulatory protein (PEP synthase regulatory protein) (PSRP) (EC 2.7.11.33) (EC 2.7.4.28) (Pyruvate, water dikinase regulatory protein)	277	PEP synthetase regulatory protein	P0A8A4
aroH	1	b1704	ECK120001116	1788435	1789481	forward			Phospho-2-dehydro-3-deoxyheptonate aldolase, Trp-sensitive (EC 2.5.1.54) (3-deoxy-D-arabino-heptulosonate 7-phosphate synthase) (DAHP synthase) (Phospho-2-keto-3-deoxyheptonate aldolase)	348	2-dehydro-3-deoxyphosphoheptonate aldolase	P00887
ydiE	5	b1705	ECK120000076	1789613	1789804	forward			Uncharacterized protein YdiE	63	conserved protein	P0ACX9
ydiU	1	b1706	ECK120002254	1789808	1791244	reverse			UPF0061 protein YdiU	478	conserved protein	P77649
ydiV	1	b1707	ECK120003512	1791307	1792020	reverse			Putative anti-FlhC(2)FlhD(4) factor YdiV (c-di-GMP regulator CdgR)	237	anti-FlhDC factor	P76204
nlpC	1	b1708	ECK120003513	1792267	1792731	reverse			Probable endopeptidase NlpC (EC 3.4.-.-) (ORF-17) (Probable lipoprotein NlpC)	154	NlpC-putative lipoprotein hydrolase	P23898
btuD	1	b1709	ECK120001117	1792809	1793558	reverse			Vitamin B12 import ATP-binding protein BtuD (EC 3.6.3.33) (Vitamin B12-transporting ATPase)	249	vitamin B<sub>12</sub> ABC transporter - ATP binding subunit	P06611
btuE	1	b1710	ECK120000124	1793558	1794109	reverse			Thioredoxin/glutathione peroxidase BtuE (EC 1.11.1.15) (EC 1.11.1.9)	183	thioredoxin/glutathione peroxidase	P06610
btuC	1	b1711	ECK120000125	1794172	1795152	reverse			Vitamin B12 import system permease protein BtuC	326	vitamin B<sub>12</sub> ABC transporter - membrane subunit	P06609
ihfA	1	b1712	ECK120000123	1795253	1795552	reverse			Integration host factor subunit alpha (IHF-alpha)	99	integration host factor (IHF), &alpha; subunit	P0A6X7
pheT	1	b1713	ECK120000433	1795557	1797944	reverse			Phenylalanine--tRNA ligase beta subunit (EC 6.1.1.20) (Phenylalanyl-tRNA synthetase beta subunit) (PheRS)	795	phenylalanine-tRNA ligase &beta;-chain	P07395
pheS	1	b1714	ECK120000702	1797959	1798942	reverse			Phenylalanine--tRNA ligase alpha subunit (EC 6.1.1.20) (Phenylalanyl-tRNA synthetase alpha subunit) (PheRS)	327	phenylalanine-tRNA ligase &alpha;-chain	P08312
pheM	No age assigned	b1715	ECK120000701	1799226	1799270	reverse			Phenylalanine--tRNA ligase operon leader peptide (pheST attenuator peptide)	14	phenylalanyl-tRNA synthetase (pheST) operon leader peptide	P0AD74
rplT	1	b1716	ECK120001246	1799393	1799749	reverse			50S ribosomal protein L20 (Large ribosomal subunit protein bL20)	118	50S ribosomal subunit protein L20	P0A7L3
rpmI	1	b1717	ECK120000872	1799802	1799999	reverse			50S ribosomal protein L35 (Large ribosomal subunit protein bL35) (Ribosomal protein A)	65	50S ribosomal subunit protein L35	P0A7Q1
infC	1	b1718	ECK120001209	1800096	1800638	reverse			Translation initiation factor IF-3 [Cleaved into: Translation initiation factor IF-3, N-terminally processed; Translation initiation factor IF-3S]	180	protein chain initiation factor IF-3	P0A707
thrS	1	b1719	ECK120003515	1800642	1802570	reverse			Threonine--tRNA ligase (EC 6.1.1.3) (Threonyl-tRNA synthetase) (ThrRS)	642	threonine-tRNA ligase	P0A8M3
arpB_1	6		ECK120000990	1803094	1803567	forward	Split gene (partner arpB_2)	Ecogene: A frameshift at codon 142 is translated as an X in the reconstructed protein sequence. An intact allele is present in O157:H7 EDL933 as Z2749, which has K142.	Putative ankyrin repeat protein B	157	predicted protein, N-ter fragment	P76205
arpB_2	Split gene		ECK120003525	1803578	1804993	forward	Split gene (partner arpB_1)	Ecogene: A frameshift at codon 142 is translated as an X in the reconstructed protein sequence. An intact allele is present in O157:H7 EDL933 as Z2749, which has K142.		471	predicted protein, C-ter fragment
yniD	9	b4535	ECK120003588	1805165	1805272	forward			Uncharacterized protein YniD	35	small predicted membrane protein	Q2EES1
ydiY	1	b1722	ECK120016305	1805325	1806083	reverse			Uncharacterized protein YdiY	252	conserved protein	P76206
pfkB	1	b1723	ECK120003516	1806370	1807299	forward			ATP-dependent 6-phosphofructokinase isozyme 2 (ATP-PFK 2) (Phosphofructokinase 2) (EC 2.7.1.11) (6-phosphofructokinase isozyme II) (Phosphohexokinase 2)	309	6-phosphofructokinase II	P06999
ydiZ	1	b1724	ECK120000692	1807400	1807690	forward			Uncharacterized protein YdiZ	96	putative protein	P64479
yniA	1	b1725	ECK120003517	1807796	1808656	forward			Putative kinase YniA	286	predicted phosphotransferase/kinase	P77739
yniB	1	b1726	ECK120003518	1808697	1809233	reverse			Uncharacterized protein YniB	178	predicted inner membrane protein	P76208
yniC	1	b1727	ECK120003519	1809380	1810048	forward			Hexitol phosphatase B (2-deoxyglucose-6-phosphate phosphatase) (EC 3.1.3.68) (Mannitol-1-phosphatase) (EC 3.1.3.22) (Sorbitol-6-phosphatase) (EC 3.1.3.50) (Sugar-phosphatase) (EC 3.1.3.23)	222	2-deoxyglucose-6-phosphatase	P77247
ydjM	1	b1728	ECK120003520	1810211	1810801	forward			Inner membrane protein YdjM	196	predicted inner membrane protein regulated by LexA	P64481
tcyP	1	b1729	ECK120003521	1810934	1812325	forward			L-cystine transporter YdjN	463	cystine / cysteine:cation symporter	P77529
ydjO	9	b1730	ECK120003522	1812329	1813132	reverse			Uncharacterized protein YdjO	267	putative protein	P76210
cedA	5	b1731	ECK120003523	1813421	1813663	reverse			Cell division activator CedA	80	cell division modulator	P0AE60
katE	1	b1732	ECK120003524	1813867	1816128	forward			Catalase HPII (EC 1.11.1.6) (Hydroxyperoxidase II)	753	catalase II	P21179
chbG	1	b1733	ECK120000502	1816386	1817135	reverse			Chitooligosaccharide deacetylase ChbG (COD) (EC 3.5.1.105) (Chitin disaccharide deacetylase) (Chitobiose deacetylase) (Chitobiose-6P deacetylase) (Chitotriose deacetylase) (Chitotriose-6P deacetylase)	249	chito-oligosaccharide mono-deacetylase	P37794
chbF	1	b1734	ECK120002087	1817148	1818500	reverse			6-phospho-beta-glucosidase (EC 3.2.1.86) (Cellobiose-6-phosphate hydrolase) (Phospho-chitobiase)	450	monoacetylchitobiose-6-phosphate hydrolase	P17411
chbR	1	b1735	ECK120000140	1818605	1819447	reverse			HTH-type transcriptional regulator ChbR (Chb operon repressor)	280	ChbR DNA-binding transcriptional dual regulator	P17410
chbA	1	b1736	ECK120000139	1819455	1819805	reverse			PTS system N,N'-diacetylchitobiose-specific EIIA component (EIIA-Chb) (EIII-Chb) (IIIcel) (N,N'-diacetylchitobiose-specific phosphotransferase enzyme IIA component)	116	chitobiose PTS permease - ChbA subunit	P69791
chbC	1	b1737	ECK120000138	1819856	1821214	reverse			PTS system N,N'-diacetylchitobiose-specific EIIC component (EIIC-Chb) (IIcel) (N,N'-diacetylchitobiose-specific phosphotransferase enzyme IIC component)	452	chitobiose PTS permease - ChbC subunit	P17334
chbB	1	b1738	ECK120000137	1821299	1821619	reverse			PTS system N,N'-diacetylchitobiose-specific EIIB component (EIIB-Chb) (IVcel) (N,N'-diacetylchitobiose-specific phosphotransferase enzyme IIB component) (EC 2.7.1.196)	106	chitobiose PTS permease - ChbB subunit	P69795
osmE	1	b1739	ECK120000136	1821918	1822256	reverse			Osmotically-inducible putative lipoprotein OsmE (Activator of ntr-like gene protein)	112	osmotically inducible protein OsmE	P0ADB1
nadE	1	b1740	ECK120000040	1822458	1823285	forward			NH(3)-dependent NAD(+) synthetase (EC 6.3.1.5) (Nicotinamide adenine dinucleotide synthetase) (NADS) (Nitrogen regulatory protein)	275	NAD synthetase, NH<sub>3</sub>-dependent	P18843
cho	1	b1741	ECK120000656	1823515	1824402	forward			Excinuclease cho (EC 3.1.25.-) (Endonuclease cho) (UvrC homolog protein)	295	endonuclease of nucleotide excision repair	P76213
ves	1	b1742	ECK120003526	1824362	1824937	reverse			Protein Ves (Various environmental stresses-induced protein)	191	conserved protein	P76214
spy	1	b1743	ECK125121999	1825140	1825625	reverse			Periplasmic chaperone Spy (Spheroplast protein Y)	161	ATP-independent periplasmic chaperone	P77754
astE	1	b1744	ECK120003527	1825955	1826923	reverse			Succinylglutamate desuccinylase (EC 3.5.1.96)	322	succinylglutamate desuccinylase	P76215
astB	1	b1745	ECK120003528	1826916	1828259	reverse			N-succinylarginine dihydrolase (EC 3.5.3.23)	447	succinylarginine dihydrolase	P76216
astD	1	b1746	ECK120003529	1828256	1829734	reverse			N-succinylglutamate 5-semialdehyde dehydrogenase (EC 1.2.1.71) (Succinylglutamic semialdehyde dehydrogenase) (SGSD)	492	aldehyde dehydrogenase	P76217
astA	1	b1747	ECK120003530	1829731	1830765	reverse			Arginine N-succinyltransferase (AST) (EC 2.3.1.109) (AOST)	344	arginine succinyltransferase	P0AE37
astC	1	b1748	ECK120003531	1830762	1831982	reverse			Succinylornithine transaminase (SOAT) (EC 2.6.1.81) (Carbon starvation protein C) (Succinylornithine aminotransferase)	406	succinylornithine transaminase	P77581
xthA	1	b1749	ECK120003532	1832428	1833234	forward			Exodeoxyribonuclease III (EXO III) (Exonuclease III) (EC 3.1.11.2) (AP endonuclease VI)	268	exonuclease III	P09030
ydjX	1	b1750	ECK120001062	1833401	1834111	forward			TVP38/TMEM64 family membrane protein YdjX	236	inner membrane protein YdjX	P76219
ydjY	1	b1751	ECK120003533	1834116	1834793	forward			Uncharacterized protein YdjY	225	putative protein	P76220
ydjZ	1	b1752	ECK120003534	1834808	1835515	forward			TVP38/TMEM64 family inner membrane protein YdjZ	235	conserved inner membrane protein	P76221
ynjA	1	b1753	ECK120003535	1835515	1836063	forward			Uncharacterized protein YnjA	182	conserved protein	P76222
ynjB	1	b1754	ECK120003536	1836073	1837239	forward			Protein YnjB	388	conserved protein	P76223
ynjC	1	b1755	ECK120003537	1837212	1838747	forward			Inner membrane ABC transporter permease protein YnjC	511	putative transport protein, ABC superfamily - membrane component	P76224
ynjD	1	b1756	ECK120003538	1838747	1839400	forward			Uncharacterized ABC transporter ATP-binding protein YnjD	217	putative transport protein, ABC superfamily - ATP-binding subunit	P76909
ynjE	1	b1757	ECK120003539	1839467	1840774	forward			Thiosulfate sulfurtransferase YnjE (EC 2.8.1.1)	435	molybdopterin synthase sulfurtransferase	P78067
ynjF	1	b1758	ECK120003540	1840783	1841403	reverse			Inner membrane protein YnjF	206	predicted phosphatidyl transferase, inner membrane protein	P76226
nudG	1	b1759	ECK120003541	1841490	1841897	forward			CTP pyrophosphohydrolase (EC 3.6.1.65)	135	5-hydroxy-CTP diphosphatase	P77788
ynjH	2	b1760	ECK120003542	1841863	1842135	reverse			Uncharacterized protein YnjH	90	putative protein	P76227
gdhA	1	b1761	ECK120003543	1842371	1843714	forward			NADP-specific glutamate dehydrogenase (NADP-GDH) (EC 1.4.1.4)	447	glutamate dehydrogenase	P00370
ynjI	5	b1762	ECK120000365	1843831	1844871	reverse			Inner membrane protein YnjI	346	predicted inner membrane protein	P76228
topB	1	b1763	ECK120003544	1844999	1846960	reverse			DNA topoisomerase 3 (EC 5.99.1.2) (DNA topoisomerase III)	653	DNA topoisomerase III	P14294
selD	1	b1764	ECK120001003	1846965	1848008	reverse			Selenide, water dikinase (EC 2.7.9.3) (Selenium donor protein) (Selenophosphate synthase)	347	selenide, water dikinase	P16456
ydjA	1	b1765	ECK120000932	1848125	1848676	reverse			Putative NAD(P)H nitroreductase YdjA (EC 1.-.-.-)	183	predicted oxidoreductase	P0ACY1
sppA	1	b1766	ECK120001118	1848837	1850693	forward			Protease 4 (EC 3.4.21.-) (Endopeptidase IV) (Protease IV) (Signal peptide peptidase)	618	protease IV, a signal peptide peptidase	P08395
ansA	1	b1767	ECK120000957	1850860	1851876	forward			L-asparaginase 1 (EC 3.5.1.1) (L-asparaginase I) (L-ASNase I) (L-asparagine amidohydrolase I)	338	asparaginase I	P0A962
pncA	1	b1768	ECK120000041	1851887	1852528	forward			Nicotinamidase (EC 3.5.1.19) (Nicotinamide deamidase) (NAMase) (Pyrazinamidase) (PZAase) (EC 3.5.1.-)	213	nicotinamidase/pyrazinamidase	P21369
ydjE	1	b1769	ECK120001119	1852621	1853979	reverse			Inner membrane metabolite transport protein YdjE	452	putative transport protein, major facilitator superfamily	P38055
ydjF	1	b1770	ECK120002237	1854096	1854854	reverse			Uncharacterized HTH-type transcriptional regulator YdjF	252	predicted DNA-binding transcriptional regulator	P77721
ydjG	1	b1771	ECK120003545	1854991	1855971	reverse			NADH-specific methylglyoxal reductase (EC 1.1.1.-) (AKR11B2)	326	methylglyoxal reductase (NADH-dependent)	P77256
ydjH	1	b1772	ECK120003546	1855981	1856928	reverse			Uncharacterized sugar kinase YdjH (EC 2.7.1.-)	315	predicted kinase	P77493
ydjI	1	b1773	ECK120003547	1856933	1857769	reverse			Uncharacterized protein YdjI	278	predicted aldolase	P77704
ydjJ	1	b1774	ECK120003548	1857790	1858833	reverse			Uncharacterized zinc-type alcohol dehydrogenase-like protein YdjJ (EC 1.-.-.-)	347	predicted oxidoreductase, Zn-dependent and NAD(P)-binding	P77280
ydjK	1	b1775	ECK120003549	1858850	1860229	reverse			Putative metabolite transport protein YdjK	459	putative transport protein, major facilitator superfamily	P76230
ydjL	1	b1776	ECK120003550	1860256	1861332	reverse			Uncharacterized zinc-type alcohol dehydrogenase-like protein YdjL (EC 1.-.-.-)	358	predicted oxidoreductase, Zn-dependent and NAD(P)-binding	P77539
yeaC	1	b1777	ECK120003551	1861702	1861974	reverse			Uncharacterized protein YeaC	90	conserved protein	P76231
msrB	1	b1778	ECK120003552	1862016	1862429	reverse			Peptide methionine sulfoxide reductase MsrB (EC 1.8.4.12) (Peptide-methionine (R)-S-oxide reductase)	137	methionine sulfoxide reductase B	P0A746
gapA	1	b1779	ECK120002257	1862771	1863766	forward			Glyceraldehyde-3-phosphate dehydrogenase A (GAPDH-A) (EC 1.2.1.12) (NAD-dependent glyceraldehyde-3-phosphate dehydrogenase)	331	glyceraldehyde 3-phosphate dehydrogenase	P0A9B2
yeaD	1	b1780	ECK120000360	1863850	1864734	forward			Putative glucose-6-phosphate 1-epimerase (EC 5.1.3.15) (Putative D-hexose-6-phosphate mutarotase) (Unknown protein from 2D-page spots T26/PR37)	294	conserved protein	P39173
yeaE	1	b1781	ECK120003553	1864782	1865636	reverse			Uncharacterized protein YeaE	284	methylglyoxal reductase	P76234
mipA	1	b1782	ECK120003554	1865726	1866472	reverse			MltA-interacting protein	248	scaffolding protein that interacts with murein polymerase and murein hydrolase	P0A908
yeaG	1	b1783	ECK120003555	1866908	1868842	forward			Uncharacterized protein YeaG	644	protein kinase	P0ACY3
yeaH	1	b1784	ECK120003556	1868955	1870238	forward			UPF0229 protein YeaH	427	conserved protein	P76235
cdgI	1	b1785	ECK120003557	1870385	1871860	forward			Probable diguanylate cyclase CdgI (DGC) (EC 2.7.7.65)	491	predicted c-di-GMP binding protein	P76236	yes
dgcJ	1	b1786	ECK120003558	1872041	1873531	forward			Probable diguanylate cyclase DgcJ (DGC) (EC 2.7.7.65)	496	predicted diguanylate cyclase	P76237	yes
yeaK	1	b1787	ECK120003559	1873574	1874077	forward			Uncharacterized protein YeaK	167	mischarged aminoacyl-tRNA deacylase	P64483
yoaI	9	b1788	ECK120003560	1874078	1874182	reverse			Uncharacterized protein YoaI	34	putative protein	P76239
yeaL	1	b1789	ECK120003561	1874352	1874798	forward			UPF0756 membrane protein YeaL	148	conserved inner membrane protein	P0ACY6
nimR	1	b1790	ECK120003562	1874755	1875576	reverse			HTH-type transcriptional regulator NimR (Regulator of nimT)	273	NimR DNA-binding transcriptional repressor	P76241
nimT	1	b1791	ECK120003563	1875673	1876854	forward			2-nitroimidazole transporter	393	drug (nitroimidazole) efflux pump	P76242
yeaO	1	b1792	ECK120003564	1876909	1877256	forward			Uncharacterized protein YeaO	115	conserved protein	P76243
yoaF	1	b1793	ECK120003565	1877278	1877532	reverse			Uncharacterized protein YoaF	84	conserved outer membrane protein	P64493
dgcP	1	b1794	ECK120048861	1877715	1878740	forward			Diguanylate cyclase DgcP (DGC) (EC 2.7.7.65)	341	diguanylate cyclase	P76245
yoaK	5	b4676	ECK120004476	1878773	1878871	forward			Uncharacterized membrane protein YoaK	32	small membrane protein	C1P602
yoaJ	9	b4675	ECK120003566	1878874	1878948	forward			Uncharacterized protein YoaJ	24	small membrane protein	C1P603
yeaQ	2	b1795	ECK120048860	1879007	1879255	reverse			UPF0410 protein YeaQ	82	conserved inner membrane protein	P64485
yoaG	1	b1796	ECK120003568	1879403	1879585	reverse			Protein YoaG	60	putative protein	P64496
yeaR	1	b1797	ECK120003569	1879589	1879948	reverse			Uncharacterized protein YeaR	119	conserved protein	P64488
leuE	1	b1798	ECK120003570	1880121	1880759	reverse			Leucine efflux protein	212	leucine exporter	P76249
dmlR	1	b1799	ECK120003571	1880886	1881809	reverse			HTH-type transcriptional regulator DmlR (D-malate degradation protein R)	307	DmlR DNA-binding transcriptional regulator	P76250
dmlA	1	b1800	ECK120003572	1881912	1882997	forward			D-malate dehydrogenase [decarboxylating] (EC 1.1.1.83) (D-malate degradation protein A) (D-malate oxidase)	361	D-malate / 3-isopropylmalate dehydrogenase (decarboxylating)	P76251
yeaV	1	b1801	ECK120003573	1883188	1884633	forward			Uncharacterized transporter YeaV	481	putative transport protein, betaine/carnitine/choline transporter family	P0ABD1
yeaW	1	b1802	ECK120003574	1884665	1885789	forward			Carnitine monooxygenase oxygenase subunit (EC 1.14.13.-) (Carnitine monooxygenase alpha subunit)	374	2Fe-2S cluster-containing protein	P0ABR7
yeaX	1	b1803	ECK120003575	1885845	1886810	forward			Carnitine monooxygenase reductase subunit (EC 1.14.13.-) (Carnitine monooxygenase beta subunit)	321	predicted oxidoreductase	P76254
rnd	1	b1804	ECK120000849	1886864	1887991	reverse			Ribonuclease D (RNase D) (EC 3.1.13.5)	375	RNase D	P09155
fadD	1	b1805	ECK120002644	1888061	1889746	reverse			Long-chain-fatty-acid--CoA ligase (EC 6.2.1.3) (Long-chain acyl-CoA synthetase) (Acyl-CoA synthetase)	561	fatty acyl-CoA synthetase	P69451
yeaY	2	b1806	ECK120001484	1889951	1890532	reverse			Uncharacterized lipoprotein YeaY	193	predicted lipoprotein	P0AA91
tsaB	1	b1807	ECK120003577	1890572	1891267	reverse			tRNA threonylcarbamoyladenosine biosynthesis protein TsaB (t(6)A37 threonylcarbamoyladenosine biosynthesis protein TsaB)	231	N<sup>6</sup>-L-threonylcarbamoyladenine synthase, TsaB subunit	P76256
yoaA	1	b1808	ECK120003578	1891325	1893235	reverse			Probable ATP-dependent DNA helicase YoaA (EC 3.6.4.12)	636	putative 5' to 3' DNA helicase implicated in DNA repair	P76257
yoaB	1	b1809	ECK120003579	1893367	1893711	forward			RutC family protein YoaB	114	conserved protein	P0AEB7	yes
yoaC	5	b1810	ECK120003580	1894133	1894432	forward			Uncharacterized protein YoaC	99	putative protein	P64490
yoaH	1	b1811	ECK120003581	1894552	1894731	reverse			UPF0181 protein YoaH	59	conserved protein	P67338
pabB	1	b1812	ECK120003582	1894805	1896166	forward			Aminodeoxychorismate synthase component 1 (ADC synthase) (ADCS) (EC 2.6.1.85) (4-amino-4-deoxychorismate synthase component 1)	453	aminodeoxychorismate synthase component 1	P05041
nudL	1	b1813	ECK120000676	1896170	1896748	forward			Uncharacterized Nudix hydrolase NudL (EC 3.6.1.-)	192	predicted NUDIX hydrolase with low 3-phosphohydroxypyruvate phosphatase activity	P43337
sdaA	1	b1814	ECK120002358	1896932	1898296	forward			L-serine dehydratase 1 (SDH 1) (EC 4.3.1.17) (L-serine deaminase 1) (L-SD1)	454	L-serine deaminase I	P16095
pdeD	1	b1815	ECK120000919	1898427	1900025	forward			Probable cyclic di-GMP phosphodiesterase PdeD (EC 3.1.4.52)	532	predicted c-di-GMP phosphodiesterase	P76261
yoaE	1	b1816	ECK120003583	1900029	1901585	reverse			UPF0053 inner membrane protein YoaE	518	predicted inner membrane protein	P0AEC0
manX	1	b1817	ECK120003584	1902048	1903019	forward			PTS system mannose-specific EIIAB component (EC 2.7.1.191) (EIIAB-Man) (EIII-Man) [Includes: Mannose-specific phosphotransferase enzyme IIA component (PTS system mannose-specific EIIA component); Mannose-specific phosphotransferase enzyme IIB component (PTS system mannose-specific EIIB component)]	323	mannose PTS permease - ManX subunit	P69797
manY	1	b1818	ECK120000560	1903082	1903882	forward			PTS system mannose-specific EIIC component (EII-P-Man) (EIIC-Man) (Mannose permease IIC component)	266	mannose PTS permease - ManY subunit	P69801
manZ	1	b1819	ECK120000561	1903895	1904746	forward			PTS system mannose-specific EIID component (EII-M-Man) (EIID-Man) (Mannose permease IID component)	283	mannose PTS permease - ManZ subunit	P69805
yobD	2	b1820	ECK120000562	1904801	1905259	forward			UPF0266 membrane protein YobD	152	conserved inner membrane protein	P67601
mntP	1	b1821	ECK120003585	1905688	1906254	forward			Probable manganese efflux pump MntP	188	manganese export protein	P76264
rlmA	1	b1822	ECK120003586	1906251	1907060	reverse			23S rRNA (guanine(745)-N(1))-methyltransferase (EC 2.1.1.187) (23S rRNA m1G745 methyltransferase) (Ribosomal RNA large subunit methyltransferase A)	269	23S rRNA m<sup>1</sup>G745 methyltransferase	P36999
cspC	1	b1823	ECK120002094	1907226	1907435	reverse			Cold shock-like protein CspC (CSP-C)	69	stress protein, member of the CspA family	P0A9Y6
yobF	9	b1824	ECK120002092	1907448	1907591	reverse			Protein YobF	47	small protein involved in stress responses	P64508
yebO	1	b1825	ECK120003587	1908261	1908548	reverse			Uncharacterized protein YebO	95	putative protein	P64499
mgrB	9	b1826	ECK120003589	1908623	1908766	reverse			PhoP/PhoQ regulator MgrB	47	negative feedback regulator of the PhoQP system	P64512
yobH	1	b4536	ECK120003619	1908925	1909164	forward			Uncharacterized protein YobH	79	putative protein	Q2MB16
kdgR	1	b1827	ECK120016306	1909308	1910099	reverse			Transcriptional regulator KdgR	263	KdgR DNA-binding transcriptional repressor	P76268
yebQ	1	b1828	ECK120003590	1910276	1911649	forward			Uncharacterized transporter YebQ	457	putative transport protein, major facilitator superfamily	P76269
htpX	1	b1829	ECK120003591	1911695	1912576	reverse			Protease HtpX (EC 3.4.24.-) (Heat shock protein HtpX)	293	heat shock protein, integral membrane protein	P23894
prc	1	b1830	ECK120000455	1912768	1914816	reverse			Tail-specific protease (EC 3.4.21.102) (C-terminal-processing peptidase) (PRC protein) (Protease Re)	682	tail-specific protease	P23865
proQ	1	b1831	ECK120000751	1914836	1915534	reverse			RNA chaperone ProQ	232	RNA chaperone, involved in posttranscriptional control of ProP levels	P45577	yes
msrC	1	b1832	ECK120002409	1915631	1916128	reverse			Free methionine-R-sulfoxide reductase (fRMsr) (EC 1.8.4.14)	165	free methionine-(<i>R</i>)-sulfoxide reductase	P76270
yebS	1	b1833	ECK120003592	1916258	1917541	forward			Inner membrane protein YebS	427	conserved inner membrane protein	P0AD03
yebT	1	b1834	ECK120003593	1917510	1920143	forward			Uncharacterized protein YebT	877	conserved protein	P76272
rsmF	1	b1835	ECK120003594	1920223	1921662	forward			Ribosomal RNA small subunit methyltransferase F (EC 2.1.1.178) (16S rRNA m5C1407 methyltransferase) (rRNA (cytosine-C(5)-)-methyltransferase RsmF)	479	16S rRNA m<sup>5</sup>C1407 methyltransferase	P76273
yebV	5	b1836	ECK120003595	1921780	1922016	forward			Uncharacterized protein YebV	78	putative protein	P64503
yebW	5	b1837	ECK120003596	1922121	1922312	forward			Uncharacterized protein YebW	63	putative protein	P76275
pphA	1	b1838	ECK120002577	1922313	1922969	reverse			Serine/threonine-protein phosphatase 1 (EC 3.1.3.16)	218	phosphoprotein phosphatase 1	P55798
yebY	2	b1839	ECK120002594	1923365	1923706	reverse			Uncharacterized protein YebY	113	putative protein	P64506
yebZ	1	b1840	ECK120003599	1923719	1924591	reverse			Inner membrane protein YebZ	290	predicted inner membrane protein	P76278
yobA	1	b1841	ECK120003600	1924595	1924969	reverse			Protein YobA	124	conserved protein	P0AA57
holE	1	b1842	ECK120003601	1925108	1925338	forward			DNA polymerase III subunit theta (EC 2.7.7.7)	76	DNA polymerase III, &theta; subunit	P0ABS8
yobB	1	b1843	ECK120001461	1925440	1926096	forward			Uncharacterized protein YobB	218	conserved protein	P76280
exoX	1	b1844	ECK120003602	1926120	1926782	forward			Exodeoxyribonuclease 10 (EC 3.1.11.-) (Exodeoxyribonuclease X) (Exo X) (Exonuclease X)	220	exonuclease X	P0AEK0
ptrB	1	b1845	ECK120003603	1926779	1928839	reverse			Protease 2 (EC 3.4.21.83) (Oligopeptidase B) (Protease II)	686	oligopeptidase B	P24555
yebE	1	b1846	ECK120000993	1929048	1929707	reverse			Inner membrane protein YebE	219	conserved inner membrane protein	P33218
yebF	1	b1847	ECK120001740	1930034	1930390	reverse			Protein YebF	118	putative protein	P33219
yebG	1	b1848	ECK120001741	1930457	1930747	reverse			Uncharacterized protein YebG	96	conserved protein regulated by LexA	P0ACY9
purT	1	b1849	ECK120001742	1930881	1932059	forward			Formate-dependent phosphoribosylglycinamide formyltransferase (5'-phosphoribosylglycinamide transformylase 2) (Formate-dependent GAR transformylase) (EC 2.1.2.-) (GAR transformylase 2) (GART 2) (Non-folate glycinamide ribonucleotide transformylase) (Phosphoribosylglycinamide formyltransferase 2)	392	phosphoribosylglycinamide formyltransferase 2	P33221
eda	1	b1850	ECK120001743	1932115	1932756	reverse			KHG/KDPG aldolase [Includes: 4-hydroxy-2-oxoglutarate aldolase (EC 4.1.3.16) (2-keto-4-hydroxyglutarate aldolase) (KHG-aldolase); 2-dehydro-3-deoxy-phosphogluconate aldolase (EC 4.1.2.14) (2-keto-3-deoxy-6-phosphogluconate aldolase) (KDPG-aldolase) (Phospho-2-dehydro-3-deoxygluconate aldolase) (Phospho-2-keto-3-deoxygluconate aldolase)]	213	multifunctional 2-keto-3-deoxygluconate 6-phosphate aldolase and 2-keto-4-hydroxyglutarate aldolase and oxaloacetate decarboxylase	P0A955
edd	1	b1851	ECK120000250	1932793	1934604	reverse			Phosphogluconate dehydratase (EC 4.2.1.12) (6-phosphogluconate dehydratase) (Entner-Doudoroff dehydrase)	603	phosphogluconate dehydratase	P0ADF6
zwf	1	b1852	ECK120000251	1934839	1936314	reverse			Glucose-6-phosphate 1-dehydrogenase (G6PD) (EC 1.1.1.49) [Cleaved into: Extracellular death factor (EDF)]	491	glucose-6-phosphate dehydrogenase (NADP<sup>+</sup>)	P0AC53
yebK	1	b1853	ECK120001199	1936652	1937521	forward			HTH-type transcriptional regulator HexR (Hex regulon repressor)	289	YebK DNA-binding transcriptional repressor	P46118
pykA	1	b1854	ECK120002406	1937649	1939091	forward			Pyruvate kinase II (EC 2.7.1.40) (PK-2)	480	pyruvate kinase II	P21599
lpxM	1	b1855	ECK120000794	1939222	1940193	reverse			Lipid A biosynthesis myristoyltransferase (EC 2.3.1.243) (Kdo(2)-lauroyl-lipid IV(A) myristoyltransferase)	323	myristoyl-acyl carrier protein (ACP)-dependent acyltransferase	P24205
mepM	1	b1856	ECK120000607	1940313	1941635	reverse			Murein DD-endopeptidase MepM (EC 3.4.24.-) (Murein hydrolase MepM) (ORFU)	440	murein DD-endopeptidase MepM	P0AFS9
znuA	1	b1857	ECK120000011	1941651	1942583	reverse			High-affinity zinc uptake system protein ZnuA	310	Zn<sup>2+</sup> ABC transporter - periplasmic binding protein	P39172
znuC	1	b1858	ECK120003604	1942662	1943417	forward			Zinc import ATP-binding protein ZnuC (EC 3.6.3.-)	251	Zn<sup>2+</sup> ABC transporter - ATP binding subunit	P0A9X1
znuB	1	b1859	ECK120003605	1943414	1944199	forward			High-affinity zinc uptake system membrane protein ZnuB	261	Zn<sup>2+</sup> ABC transporter - membrane subunit	P39832
ruvB	1	b1860	ECK120002236	1944346	1945356	reverse			Holliday junction ATP-dependent DNA helicase RuvB (EC 3.6.4.12)	336	branch migration of Holliday structures; repair helicase	P0A812
ruvA	1	b1861	ECK120004475	1945365	1945976	reverse			Holliday junction ATP-dependent DNA helicase RuvA (EC 3.6.4.12)	203	branch migration of Holliday structures; repair	P0A809
yobI	11	b4677	ECK120001825	1946115	1946180	reverse			Uncharacterized protein YobI	21	small protein	C1P604
yebB	5	b1862	ECK120048856	1946251	1946853	forward			Uncharacterized protein YebB	200	putative protein	P24238
ruvC	1	b1863	ECK120001120	1946855	1947376	reverse			Crossover junction endodeoxyribonuclease RuvC (EC 3.1.22.4) (Holliday junction nuclease RuvC) (Holliday junction resolvase RuvC)	173	Holliday junction nuclease; resolution of structures; repair	P0A814
yebC	1	b1864	ECK120000914	1947411	1948151	reverse			Probable transcriptional regulatory protein YebC	246	conserved protein	P0A8A0
nudB	1	b1865	ECK120001121	1948180	1948632	reverse			Dihydroneopterin triphosphate diphosphatase (EC 3.6.1.67) (Dihydroneopterin triphosphate pyrophosphatase) (dATP pyrophosphohydrolase)	150	dihydroneopterin triphosphate pyrophosphohydrolase	P0AFC0
aspS	1	b1866	ECK120001122	1948750	1950522	reverse			Aspartate--tRNA ligase (EC 6.1.1.12) (Aspartyl-tRNA synthetase) (AspRS)	590	aspartate-tRNA ligase	P21889
yecD	1	b1867	ECK120000093	1950832	1951398	forward			Isochorismatase family protein YecD (EC 3.-.-.-)	188	predicted hydrolase	P0ADI7
yecE	1	b1868	ECK120002245	1951395	1952213	forward			UPF0759 protein YecE	272	conserved protein	P37348
yecN	1	b1869	ECK120002246	1952266	1952661	forward			Inner membrane protein YecN	131	predicted inner membrane protein	P64515
cmoA	1	b1870	ECK120003606	1952702	1953445	forward			Carboxy-S-adenosyl-L-methionine synthase (Cx-SAM synthase) (EC 2.1.3.-)	247	carboxy-<i>S</i>-adenosyl-L-methionine synthase	P76290
cmoB	1	b1871	ECK120003607	1953442	1954413	forward			tRNA U34 carboxymethyltransferase (EC 2.5.1.-)	323	tRNA U34 carboxymethyltransferase	P76291
torZ	1	b1872	ECK120003608	1954578	1957007	reverse			Trimethylamine-N-oxide reductase 2 (TMAO reductase 2) (Trimethylamine oxidase 2) (EC 1.7.2.3)	809	trimethylamine N-oxide reductase, TorZ subunit	P46923
torY	1	b1873	ECK120003610	1957032	1958132	reverse			Cytochrome c-type protein TorY	366	trimethylamine N-oxide reductase, <I>c</I>-type cytochrome subunit	P52005
cutC	1	b1874	ECK125165376	1958520	1959266	reverse			Copper homeostasis protein CutC	248	protein potentially involved in copper homeostasis	P67826
yecM	1	b1875	ECK120003611	1959280	1959846	reverse			Protein YecM	188	predicted metal-binding enzyme	P52007
argS	1	b1876	ECK120003612	1960062	1961795	forward			Arginine--tRNA ligase (EC 6.1.1.19) (Arginyl-tRNA synthetase) (ArgRS)	577	arginine-tRNA ligase	P11875
yecT	5	b1877	ECK120000067	1961972	1962460	forward			Uncharacterized protein YecT	162	putative protein	P76296
flhE	2	b1878	ECK120003613	1962580	1962972	reverse			Flagellar protein FlhE	130	flagellar protein	P76297
flhA	1	b1879	ECK120003614	1962972	1965050	reverse			Flagellar biosynthesis protein FlhA	692	flagellar biosynthesis protein FlhA	P76298
flhB	1	b1880	ECK120002690	1965043	1966191	reverse			Flagellar biosynthetic protein FlhB	382	flagellar biosynthesis protein FlhB	P76299
cheZ	1	b1881	ECK120003615	1966393	1967037	reverse			Protein phosphatase CheZ (EC 3.1.3.-) (Chemotaxis protein CheZ)	214	CheZ	P0A9H9
cheY	1	b1882	ECK120000147	1967048	1967437	reverse			Chemotaxis protein CheY	129	chemotaxis regulator transmitting signal to flagellar motor component	P0AE67
cheB	1	b1883	ECK120000146	1967452	1968501	reverse			Chemotaxis response regulator protein-glutamate methylesterase (EC 3.1.1.61)	349	CheB	P07330
cheR	1	b1884	ECK120000143	1968504	1969364	reverse			Chemotaxis protein methyltransferase (EC 2.1.1.80)	286	chemotaxis protein methyltransferase/chemotaxis protein methyltransferase/chemotaxis protein methyltransferase/chemotaxis protein methyltransferase/chemotaxis protein methyltransferase	P07364
tap	1	b1885	ECK120000144	1969383	1970984	reverse			Methyl-accepting chemotaxis protein IV (MCP-IV) (Dipeptide chemoreceptor protein)	533		P07018
tar	1	b1886	ECK120000977	1971030	1972691	reverse			Methyl-accepting chemotaxis protein II (MCP-II) (Aspartate chemoreceptor protein)	553		P07017
cheW	1	b1887	ECK120002614	1972836	1973339	reverse			Chemotaxis protein CheW	167	CheW	P0A964
cheA	1	b1888	ECK120000145	1973360	1975324	reverse			Chemotaxis protein CheA (EC 2.7.13.3)	654	CheA(S)	P07363
motB	1	b1889	ECK120000142	1975329	1976255	reverse			Motility protein B (Chemotaxis protein MotB)	308	MotB protein, enables flagellar motor rotation, linking torque machinery to cell wall	P0AF06
motA	1	b1890	ECK120000595	1976252	1977139	reverse			Motility protein A (Chemotaxis protein MotA)	295	MotA protein, proton conductor component of motor; no effect on switching	P09348
flhC	1	b1891	ECK120000594	1977266	1977844	reverse			Flagellar transcriptional regulator FlhC	192	FlhC transcriptional dual regulator	P0ABY7
flhD	1	b1892	ECK120000314	1977847	1978197	reverse			Flagellar transcriptional regulator FlhD	116	FlhD transcriptional dual regulator	P0A8S9
insB-5	1	b1893	ECK120023915	1978518	1979021	reverse			Insertion element IS1 5 protein InsB (IS1h)	167		P0CF28
insA-5	1	b1894	ECK120003616	1978940	1979215	reverse			Insertion element IS1 5 protein InsA (IS1h)	91	IS1 protein InsA	P0CF11
uspC	1	b1895	ECK120003617	1979753	1980181	forward			Universal stress protein C	142	universal stress protein	P46888
otsA	1	b1896	ECK120003618	1980188	1981612	reverse			Trehalose-6-phosphate synthase (TPS) (EC 2.4.1.15) (Alpha,alpha-trehalose-phosphate synthase [UDP-forming]) (Osmoregulatory trehalose synthesis protein A) (OtsA) (UDP-glucose-glucosephosphate glucosyltransferase)	474	trehalose-6-phosphate synthase	P31677
otsB	1	b1897	ECK120001690	1981587	1982387	reverse			Trehalose-6-phosphate phosphatase (TPP) (EC 3.1.3.12) (Osmoregulatory trehalose synthesis protein B) (Trehalose 6-phosphate phosphatase) (Trehalose-phosphatase)	266	trehalose-6-phosphate phosphatase	P31678
araH	1	b4460	ECK120000294	1982554	1983540	reverse			L-arabinose transport system permease protein AraH	328	arabinose ABC transporter - membrane subunit	P0AE26
araG	1	b1900	ECK120000055	1983555	1985069	reverse			Arabinose import ATP-binding protein AraG (EC 3.6.3.17)	504	arabinose ABC transporter - ATP binding subunit	P0AAF3
araF	1	b1901	ECK120000054	1985139	1986128	reverse			L-arabinose-binding periplasmic protein (ABP)	329	arabinose ABC transporter - periplasmic binding protein	P02924
ftnB	1	b1902	ECK120002615	1986925	1987428	forward			Bacterial non-heme ferritin-like protein	167	predicted ferritin-like protein	P0A9A2
yecJ	1	b4537	ECK120003672	1987507	1987758	reverse			Uncharacterized protein YecJ	83	putative protein	P0AD10
azuC	9	b4663	ECK120004145	1987873	1987959	reverse			Uncharacterized protein AzuC	28	small membrane protein	C1P605
yecR	1	b1904	ECK120048865	1988222	1988545	forward			Uncharacterized protein YecR	107	putative protein	P76308
ftnA	1	b1905	ECK120003621	1988716	1989213	forward			Bacterial non-heme ferritin (EC 1.16.3.2) (Ferritin-1)	165	ferritin iron storage protein	P0A998
yecH	5	b1906	ECK120000912	1989251	1989490	reverse			Uncharacterized protein YecH	79	putative protein	P46887
tyrP	1	b1907	ECK120003622	1989681	1990892	forward			Tyrosine-specific transport protein (Tyrosine permease)	403	tyrosine:H<sup>+</sup> symporter TyrP	P0AAD4
yecA	1	b1908	ECK120001123	1990954	1991619	reverse			Uncharacterized protein YecA	221	conserved metal-binding protein	P0AD05
pgsA	1	b1912	ECK120002481	1992269	1992817	reverse			CDP-diacylglycerol--glycerol-3-phosphate 3-phosphatidyltransferase (EC 2.7.8.5) (Phosphatidylglycerophosphate synthase) (PGP synthase)	182	phosphatidylglycerophosphate synthase	P0ABF8
uvrC	1	b1913	ECK120000698	1992874	1994706	reverse			UvrABC system protein C (Protein UvrC) (Excinuclease ABC subunit C)	610	excinuclease ABC, subunit C; repair of UV damage to DNA	P0A8G0
uvrY	1	b1914	ECK120001052	1994703	1995359	reverse			Response regulator UvrY	218	UvrY transcriptional regulator	P0AED5
yecF	2	b1915	ECK120001124	1995818	1996042	forward			Uncharacterized protein YecF	74	putative protein	P0AD07
sdiA	1	b1916	ECK120000924	1996110	1996832	reverse			Regulatory protein SdiA	240	SdiA DNA-binding transcriptional dual regulator	P07026
tcyN	1	b1917	ECK125135297	1997062	1997814	reverse			L-cystine transport system ATP-binding protein YecC (EC 3.6.3.-)	250	cystine/cysteine ABC transporter - predicted ATP binding subunit	P37774
tcyL	1	b1918	ECK120002221	1997811	1998479	reverse			L-cystine transport system permease protein YecS	222	cystine/cysteine ABC transporter - predicted membrane subunit	P0AFT2
dcyD	1	b1919	ECK120003623	1998494	1999480	reverse			D-cysteine desulfhydrase (EC 4.4.1.15)	328	D-cysteine desulfhydrase	P76316
tcyJ	1	b1920	ECK120003624	1999585	2000385	reverse			L-cystine-binding protein FliY (CBP) (Protein FliY) (Sulfate starvation-induced protein 7) (SSI7)	266	cystine/cysteine ABC transporter - periplasmic binding protein	P0AEM9
fliZ	1	b1921	ECK120003625	2000473	2001024	reverse			Regulator of sigma S factor FliZ	183	FliZ DNA-binding transcriptional regulator	P52627
fliA	1	b1922	ECK120001325	2001070	2001789	reverse			RNA polymerase sigma factor FliA (RNA polymerase sigma factor for flagellar operon) (Sigma F) (Sigma-27) (Sigma-28)	239	RNA polymerase, sigma 28 (sigma F) factor	P0AEM6
fliC	1	b1923	ECK120001324	2002110	2003606	reverse			Flagellin	498	flagellar biosynthesis; flagellin, filament structural protein	P04949
fliD	1	b1924	ECK120000315	2003872	2005278	forward			Flagellar hook-associated protein 2 (HAP2) (Filament cap protein) (Flagellar cap protein)	468	flagellar cap protein FliD; filament capping protein; enables filament assembly	P24216
fliS	1	b1925	ECK120000832	2005303	2005713	forward			Flagellar secretion chaperone FliS	136	flagellar biosynthesis protein FliS	P26608
fliT	1	b1926	ECK120001355	2005713	2006078	forward			Flagellar protein FliT	121	flagellar biosynthesis protein FliT	P0ABY2
amyA	1	b1927	ECK120001356	2006156	2007643	forward			Cytoplasmic alpha-amylase (EC 3.2.1.1) (1,4-alpha-D-glucan glucanohydrolase)	495	&alpha;-amylase	P26612
yedD	1	b1928	ECK120001354	2007677	2008090	reverse			Uncharacterized lipoprotein YedD	137	putative protein	P31063
yedE	1	b1929	ECK120001602	2008277	2009482	forward			UPF0394 inner membrane protein YedE	401	putative selenium transporter	P31064
yedF	1	b1930	ECK120001603	2009479	2009712	forward			Putative sulfur carrier protein YedF	77	conserved protein	P0AA31
yedK	1	b1931	ECK120001604	2009821	2010489	forward			Putative SOS response-associated peptidase YedK (EC 3.4.-.-)	222	putative protein	P76318
yedL	1	b1932	ECK120003627	2010600	2011079	forward			Uncharacterized N-acetyltransferase YedL (EC 2.3.1.-)	159	predicted acyltransferase	P76319
yedN_2	5		ECK120003626	2011348	2011539	reverse	Split gene (partner yedN_1)	Uniprot: YedN_1+2 as full gene in obsolete entry P76321.2 (173 AA)		63	predicted protein, N-ter fragment	obsolete entry P76321
yedN_1	Split gene		ECK120003628	2011549	2011869	reverse	Split gene (partner yedN_2)			106	predicted protein, C-ter fragment	obsolete entry P76321
yedM	9	b1935	ECK120003629	2012001	2012351	reverse			Uncharacterized protein YedM	116	conserved protein	P76322
intG	2		ECK120003637	2012502	2012780	forward			Putative protein IntG (Putative lambdoid prophage defective integrase)	92	predicted defective phage integrase	P76323
fliE	1	b1937	ECK120003630	2012700	2013014	reverse			Flagellar hook-basal body complex protein FliE	104	flagellar basal-body protein FliE	P0A8T5
fliF	1	b1938	ECK120001317	2013229	2014887	forward			Flagellar M-ring protein	552	flagellar M-ring protein FliF; basal-body MS(membrane and supramembrane)-ring and collar protein	P25798
fliG	1	b1939	ECK120001318	2014880	2015875	forward			Flagellar motor switch protein FliG	331	flagellar motor switch protein FliG	P0ABZ1
fliH	1	b1940	ECK120001598	2015868	2016554	forward			Flagellar assembly protein FliH	228	flagellar biosynthesis protein FliH	P31068
fliI	1	b1941	ECK120001599	2016554	2017927	forward			Flagellum-specific ATP synthase (EC 3.6.3.14)	457	flagellum-specific ATP synthase FliI	P52612
fliJ	1	b1942	ECK120002692	2017946	2018389	forward			Flagellar FliJ protein	147	flagellar biosynthesis protein FliJ	P52613
fliK	1	b1943	ECK120002693	2018386	2019513	forward			Flagellar hook-length control protein	375	flagellar hook-length control protein FliK	P52614
fliL	1	b1944	ECK120002694	2019618	2020082	forward			Flagellar protein FliL	154	flagellar protein FliL	P0ABX8
fliM	1	b1945	ECK120000316	2020087	2021091	forward			Flagellar motor switch protein FliM	334	flagellar motor switch protein FliM	P06974
fliN	1	b1946	ECK120000317	2021088	2021501	forward			Flagellar motor switch protein FliN	137	flagellar motor switch protein FliN	P15070
fliO	1	b1947	ECK120000318	2021504	2021869	forward			Flagellar protein FliO	121	flagellar biosynthesis protein FliO	P22586
fliP	1	b1948	ECK120001202	2021869	2022606	forward			Flagellar biosynthetic protein FliP	245	flagellar biosynthesis protein FliP	P0AC05
fliQ	2	b1949	ECK120001900	2022616	2022885	forward			Flagellar biosynthetic protein FliQ	89	flagellar biosynthesis protein FliQ	P0AC07
fliR	1	b1950	ECK120001901	2022893	2023678	forward			Flagellar biosynthetic protein FliR	261	flagellar biosynthesis protein FliR	P33135
rcsA	2	b1951	ECK120001902	2023968	2024591	forward			Transcriptional regulatory protein RcsA (Colanic acid capsular biosynthesis activation protein A)	207	positive DNA-binding transcriptional regulator of capsular polysaccharide synthesis, activates its own expression	P0DMC9
dsrB	2	b1952	ECK120000811	2024635	2024823	reverse			Protein DsrB	62	putative protein	P0AEG8
yodD	1	b1953	ECK120003631	2024986	2025213	forward			Uncharacterized protein YodD	75	stress-induced protein	P64519	yes
yedP	1	b1955	ECK120003633	2025511	2026326	forward			Mannosyl-3-phosphoglycerate phosphatase (MPGP) (EC 3.1.3.70)	271	predicted phosphatase	P76329
dgcQ	1	b1956	ECK120003634	2026323	2028017	reverse			Probable diguanylate cyclase DgcQ (DGC) (EC 2.7.7.65) (Cellulose synthesis regulatory protein)	564	predicted diguanylate cyclase	P76330	yes
yodC	1	b1957	ECK120003635	2028188	2028370	reverse			Uncharacterized protein YodC	60	putative protein	P64517
yedI	1	b1958	ECK120003636	2028449	2029366	reverse			Inner membrane protein YedI	305	conserved inner membrane protein	P46125
yedA	1	b1959	ECK120002367	2029539	2030459	forward			Uncharacterized inner membrane transporter YedA	306	putative transport protein, drug/metabolite exporter family	P0AA70
vsr	1	b1960	ECK120001125	2030448	2030918	reverse			Very short patch repair protein (EC 3.1.-.-) (DNA mismatch endonuclease) (V.EcoKDcm) (Vsr mismatch endonuclease)	156	DNA mismatch endonuclease of the very short patch (VSP) mismatch repair pathway	P09184
dcm	1	b1961	ECK120001057	2030899	2032317	reverse			DNA-cytosine methyltransferase (EC 2.1.1.37) (M.EcoDcm)	472	DNA-cytosine methyltransferase	P0AED9
yedJ	1	b1962	ECK120000205	2032384	2033079	reverse			Uncharacterized protein YedJ	231	predicted phosphohydrolase	P46144
yedR	5	b1963	ECK120003639	2033119	2033484	reverse			Inner membrane protein YedR	121	predicted inner membrane protein	P76334
yedS_1	1		ECK120029424	2034051	2034536	forward	Split gene (partners yedS_2+3)	Ecogene: Pseudogene reconstruction, outer membrane protein homolog	Putative outer membrane protein YedS	161	predicted protein, N-ter fragment	P76335
yedS_2	Split gene		ECK120003638	2034546	2034755	forward	Split gene (partners yedS_1+3)	Ecogene: Pseudogene reconstruction, outer membrane protein homolog		69	predicted protein, middle fragment
yedS_3	Split gene		ECK120002463	2034839	2035243	forward	Split gene (partners yedS_1+2)	Ecogene: Pseudogene reconstruction, outer membrane protein homolog		134	predicted protein, C-ter fragment
hchA	1	b1967	ECK120003640	2035835	2036686	forward			Protein/nucleic acid deglycase 1 (EC 3.1.2.-) (EC 3.5.1.-) (EC 3.5.1.124) (Glyoxalase III) (EC 4.2.1.130) (Holding molecular chaperone) (Hsp31) (Maillard deglycase)	283	amino acid deglycase Hsp31	P31658
yedV	1	b1968	ECK120003641	2036794	2038152	reverse			Probable sensor-like histidine kinase YedV (EC 2.7.13.3)	452	predicted sensory kinase in two-component regulatory system with YedW	P76339
yedW	1	b1969	ECK120003642	2038152	2038823	reverse			Probable transcriptional regulatory protein YedW	223	YedW DNA-binding response regulator in two-component system with YedV	P76340
yedX	1	b1970	ECK120003643	2038956	2039369	forward			5-hydroxyisourate hydrolase (HIU hydrolase) (HIUHase) (EC 3.5.2.17) (Transthyretin-like protein) (TLP) (Transthyretin-related protein) (TRP)	137	hydroxyisourate hydrolase / transthyretin-related protein	P76341
msrP	1	b1971	ECK120003644	2039478	2040482	forward			Protein-methionine-sulfoxide reductase catalytic subunit MsrP (EC 1.8.5.-)	334	periplasmic methionine sulfoxide reductase	P76342
msrQ	2	b1972	ECK120003645	2040483	2041118	forward			Protein-methionine-sulfoxide reductase heme-binding subunit MsrQ (Flavocytochrome MsrQ)	211	quinol dehydrogenase	P76343
zinT	1	b1973	ECK120003646	2041375	2042025	forward			Metal-binding protein ZinT (Cadmium-induced protein ZinT)	216	cadmium-induced cadmium binding protein	P76344
yodB	1	b1974	ECK120003647	2042368	2042898	forward			Cytochrome b561 homolog 1	176	predicted cytochrome	P76345
mtfA	1	b1976	ECK120002536	2043651	2044448	forward			Protein MtfA (Mlc titration factor A)	265	Mlc titration factor	P76346
yeeJ	1	b1978	ECK120003651	2044938	2052014	forward			Uncharacterized protein YeeJ	2358	adhesin	P76347	yes
yeeL_2	Split gene		ECK120003650	2052276	2052602	reverse	Split gene (partner yeeL_1)	Ecogene: Pseudogene reconstruction, glycosyltransferase family (350 AA)		108	predicted protein, C-terminal fragment
yeeL_1	2		ECK120002049	2052624	2053328	reverse	Split gene (partner yeeL_2)	Ecogene: Pseudogene reconstruction, glycosyltransferase family (350 AA)	Putative uncharacterized protein YeeL	234	predicted protein, N-terminal fragment	P76349
shiA	1	b1981	ECK120003652	2053643	2054959	forward			Shikimate transporter	438	shikimate:H<sup>+</sup> symporter	P76350
amn	1	b1982	ECK120003653	2055061	2056515	forward			AMP nucleosidase (EC 3.2.2.4)	484	AMP nucleosidase	P0AE12
yeeN	1	b1983	ECK120000035	2056858	2057574	forward			Probable transcriptional regulatory protein YeeN	238	conserved protein	P0A8A2
yeeO	1	b1985	ECK120003655	2058203	2059846	reverse			Probable FMN/FAD exporter YeeO	547	FMN / FAD exporter	P76352
cbl	1	b1987	ECK120002464	2059964	2060914	reverse			HTH-type transcriptional regulator cbl	316	Cbl DNA-binding transcriptional activator	Q47083
nac	1	b1988	ECK120003657	2061016	2061933	reverse			Nitrogen assimilation regulatory protein nac (Nitrogen assimilation control protein)	305	Nac DNA-binding transcriptional dual regulator	Q47005
ldtA	1	b1990	ECK120002465	2062391	2063323	reverse			Probable L,D-transpeptidase ErfK/SrfK (EC 2.-.-.-)	310	L,D-transpeptidase ErfK	P39176
cobT	1	b1991	ECK120003659	2063388	2064467	reverse			Nicotinate-nucleotide--dimethylbenzimidazole phosphoribosyltransferase (NN:DBI PRT) (EC 2.4.2.21) (N(1)-alpha-phosphoribosyltransferase)	359	nicotinate-nucleotide dimethylbenzimidazole phosphoribosyltransferase	P36562
cobS	1	b1992	ECK120002050	2064479	2065222	reverse			Adenosylcobinamide-GDP ribazoletransferase (EC 2.7.8.26) (Cobalamin synthase) (Cobalamin-5'-phosphate synthase)	247	cobalamin 5'-phosphate synthase	P36561
cobU	1	b1993	ECK120002434	2065219	2065764	reverse			Bifunctional adenosylcobalamin biosynthesis protein CobU (Adenosylcobinamide kinase) (EC 2.7.1.156) (Adenosylcobinamide-phosphate guanylyltransferase) (EC 2.7.7.62)	181	cobinamide-P guanylyltransferase / cobinamide kinase	P0AE76
yeeH	Not in Uniprot		ECK125240971	2066068	2066154	reverse				28
insH-6	1	b1994	ECK125240970	2066305	2067321	reverse			Transposase InsH for insertion sequence element IS5H	338	CP4-44 prophage; IS5 transposase and trans-activator	P0CE53
yoeG	Not in Uniprot		ECK120003660	2067360	2067892	reverse		EcoGene: Pseudogene reconstruction, CP4-44 putative defective prophage; N-terminal fragment (178 AA)		176.667
yoeH	Not in Uniprot		ECK125240969	2068261	2068419	reverse		Ecogene: Pseudogene, CP4-44 putative defective prophage; C-terminal fragment		52
yoeA	1	b1995	ECK120003661	2068635	2069027	forward		Ecogene: yoeA' is interrupted by IS2F after codon 103; an intact YoeA allele is present in O157:H6 as Z3159, annotated as a 719 aa protein, but Met-5 is used as the start site because of a much better RBS, so this trucated frameshifted pseudogene represents the first 167 of 715 amino acids.	Putative uncharacterized protein YoeA	130	CP4-44 prophage; predicted disrupted hemin or colicin receptor	P76356		CP4-44
[truncated: 2,384 more rows]

## Sheet: Operons (RegulonDB)
Operon	Genes in operon
C0067	C0067
C0299	C0299
C0362	C0362
C0465	C0465
C0614	C0614
C0664	C0664
C0719	C0719
IS128	IS128
aaeR	aaeR
aaeXAB	aaeX,aaeA,aaeB
aas-lplT	aas,lplT
aat	aat
abgABT-ogt	abgA,abgB,abgT,ogt
abgR	abgR
abpAB	abpA,abpB
abrB	abrB
accA	accA
accBC	accB,accC
accD	accD
aceBAK	aceB,aceA,aceK
ackA-pta	ackA,pta
acnA	acnA
acnB	acnB
acpH	acpH
acpT	acpT
acrAB	acrA,acrB
acrD	acrD
acrEF	acrE,acrF
acrR	acrR
acrZ	acrZ
acs-yjcH-actP	acs,yjcH,actP
ada-alkB	ada,alkB
add	add
adeD	adeD
adeP	adeP
adeQ	adeQ
adhE	adhE
adhP	adhP
adiA	adiA
adiC	adiC
adiY	adiY
adk	adk
aegA	aegA
aer	aer
aes	aes
agaR	agaR
agaS-kbaY-agaBCDI	agaS,kbaY,agaB,agaC,agaD,agaI
agp	agp
agrA	agrA
agrB	agrB
ahpCF	ahpC,ahpF
ahr	ahr
aidB	aidB
ais	ais
alaA-yfbR	alaA,yfbR
alaC	alaC
alaE	alaE
alaS	alaS
alaWX	alaW,alaX
aldA	aldA
aldB	aldB
alkA	alkA
allA	allA
allDCE	allD,allC,allE
allR	allR
allS	allS
alpA	alpA
alr	alr
alsK	alsK
alx	alx
amiA-hemF	amiA,hemF
amiC	amiC
amn	amn
ampC	ampC
ampDE	ampD,ampE
ampH	ampH
amyA	amyA
anmK	anmK
ansA-pncA	ansA,pncA
ansB	ansB
ansP	ansP
aphA	aphA
appCBXA	appC,appB,appX,appA
appY	appY
apt	apt
aqpZ	aqpZ
araBAD	araB,araA,araD
araC	araC
araE-ygeA	araE,ygeA
araFGH	araF,araG,araH
araJ	araJ
arcA	arcA
arcB	arcB
arcZ	arcZ
arfA	arfA
argA	argA
argCBH	argC,argB,argH
argD	argD
argE	argE
argF	argF
argG	argG
argI	argI
argO	argO
argP	argP
argR	argR
argS	argS
argT-hisJQMP	argT,hisJ,hisQ,hisM,hisP
argU	argU
argW	argW
argX-hisR-leuT-proM	argX,hisR,leuT,proM
arnBCADTEF	arnB,arnC,arnA,arnD,arnT,arnE,arnF
aroF-tyrA	aroF,tyrA
aroG	aroG
aroH	aroH
aroKB-damX-dam-rpe-gph-trpS	aroK,aroB,damX,dam,rpe,gph,trpS
aroL-yaiA-aroM	aroL,yaiA,aroM
aroP	aroP
arpA	arpA
arpB_1B_2	arpB_1,arpB_2
arrS	arrS
arsRBC	arsR,arsB,arsC
artJ	artJ
artPIQM	artP,artI,artQ,artM
ascFB	ascF,ascB
ascG	ascG
asd	asd
aslA	aslA
aslB	aslB
asmA	asmA
asnA	asnA
asnB	asnB
asnC-mioC-mnmG-rsmG	asnC,mioC,mnmG,rsmG
asnS	asnS
asnT	asnT
asnU	asnU
asnV	asnV
asnW	asnW
aspA-dcuA	aspA,dcuA
aspC	aspC
aspS	aspS
aspT	aspT
aspU	aspU
aspV	aspV
asr	asr
astCADBE	astC,astA,astD,astB,astE
atl	atl
atoDAEB	atoD,atoA,atoE,atoB
atoSC	atoS,atoC
atpIBEFHAGDC	atpI,atpB,atpE,atpF,atpH,atpA,atpG,atpD,atpC
avtA	avtA
azoR	azoR
azuC	azuC
bacA	bacA
bamA-skp-lpxD-fabZ-lpxAB-rnhB-dnaE	bamA,skp,lpxD,fabZ,lpxA,lpxB,rnhB,dnaE
bamB-der	bamB,der
bamD	bamD
bamE	bamE
barA	barA
basRS	basR,basS
bax	bax
bcp	bcp
bcr	bcr
bcsABZC	bcsA,bcsB,bcsZ,bcsC
bcsEFG	bcsE,bcsF,bcsG
bcsQ	bcsQ
bdcA	bdcA
bdcR	bdcR
bdm-sra	bdm,sra
bepA-yfgD	bepA,yfgD
betIBA	betI,betB,betA
betT	betT
bfd-bfr	bfd,bfr
bglA	bglA
bglGFB	bglG,bglF,bglB
bglH-yieLK	bglH,yieL,yieK
bglX	bglX
bhsA	bhsA
bioA	bioA
bioBFCD	bioB,bioF,bioC,bioD
bioH	bioH
bipA	bipA
bisC	bisC
blc	blc
blr	blr
bluF	bluF
bluR	bluR
bolA	bolA
borD	borD
brnQ-proY	brnQ,proY
bsmA	bsmA
bssR	bssR
bssS	bssS
btuB-murI	btuB,murI
btuCED	btuC,btuE,btuD
cadBA	cadB,cadA
cadC	cadC
caiF	caiF
caiTABCDE	caiT,caiA,caiB,caiC,caiD,caiE
can	can
carAB	carA,carB
cas3	cas3
casABCDE12	casA,casB,casC,casD,casE,cas1,cas2
cbl	cbl
cbpAM	cbpA,cbpM
cbrA	cbrA
cbrBC	cbrB,cbrC
cdaR	cdaR
cdd	cdd
cdgI	cdgI
cdh	cdh
cdsA	cdsA
cecR-ybhGFSR	cecR,ybhG,ybhF,ybhS,ybhR
cedA	cedA
cfa	cfa
chaA	chaA
chaBC	chaB,chaC
chbBCARFG	chbB,chbC,chbA,chbR,chbF,chbG
chiA	chiA
chiP-ybfN	chiP,ybfN
chiX	chiX
cho	cho
chpSB	chpS,chpB
cirA	cirA
citCDEFXG	citC,citD,citE,citF,citX,citG
citT	citT
clcA	clcA
clcB	clcB
clpA	clpA
clpB	clpB
clpPX-lon	clpP,clpX,lon
clpS	clpS
clsA-yciU	clsA,yciU
cmk-rpsA-ihfB	cmk,rpsA,ihfB
cmoM-mukFEB	cmoM,mukF,mukE,mukB
cmtBA-yggPFDC	cmtB,cmtA,yggP,yggF,yggD,yggC
cnu	cnu
coaA	coaA
coaE-zapD-yacG	coaE,zapD,yacG
cobUST	cobU,cobS,cobT
codBA	codB,codA
cof	cof
comR	comR
copA	copA
corA	corA
cpdB	cpdB
cpxPQ	cpxP,cpxQ
cpxRA	cpxR,cpxA
cra	cra
crcB	crcB
creABCD	creA,creB,creC,creD
crfC-yjcZ	crfC,yjcZ
crl	crl
crp	crp
csdAE	csdA,csdE
csgBAC	csgB,csgA,csgC
csgDEFG	csgD,csgE,csgF,csgG
csiD-lhgO-gabDTP	csiD,lhgO,gabD,gabT,gabP
csiE	csiE
csiR	csiR
cspA	cspA
cspB	cspB
cspD	cspD
cspE	cspE
cspF	cspF
cspG	cspG
cspH	cspH
cspI	cspI
csrA	csrA
csrB	csrB
csrC	csrC
csrD	csrD
cstA	cstA
cueO	cueO
cueR	cueR
curA	curA
cusCFBA	cusC,cusF,cusB,cusA
cusRS	cusR,cusS
cutA	cutA
cvpA-purF-ubiX	cvpA,purF,ubiX
cvrA	cvrA
cyaA	cyaA
cyaR	cyaR
cyaY	cyaY
cybB	cybB
cybC	cybC
cycA	cycA
cydAB	cydA,cydB
cydDC	cydD,cydC
cydX-ybgE	cydX,ybgE
cynR	cynR
cynTSX	cynT,cynS,cynX
cyoABCDE	cyoA,cyoB,cyoC,cyoD,cyoE
cysB	cysB
cysDNC	cysD,cysN,cysC
cysE	cysE
cysJIH	cysJ,cysI,cysH
cysK	cysK
cysPUWAM	cysP,cysU,cysW,cysA,cysM
cysQ	cysQ
cysS	cysS
cysZ	cysZ
cytR	cytR
dacA	dacA
dacB	dacB
dacC	dacC
dacD	dacD
dadAX	dadA,dadX
dapA-bamC	dapA,bamC
dapB	dapB
dauA	dauA
dcm-vsr	dcm,vsr
dcp	dcp
dcrB	dcrB
dctA	dctA
dcuB-fumB	dcuB,fumB
dcuC	dcuC
dcuD	dcuD
dcuSR	dcuS,dcuR
dcyD-tcyLN	dcyD,tcyL,tcyN
ddlA	ddlA
ddpXABCDF	ddpX,ddpA,ddpB,ddpC,ddpD,ddpF
decR	decR
def-fmt	def,fmt
degP	degP
degQS	degQ,degS
deoCABD	deoC,deoA,deoB,deoD
deoR	deoR
dfp	dfp
dgcC	dgcC
dgcE	dgcE
dgcF	dgcF
dgcJ	dgcJ
dgcM	dgcM
dgcP	dgcP
dgcQ	dgcQ
dgcT	dgcT
dgcZ	dgcZ
dgkA	dgkA
dgoRKADT	dgoR,dgoK,dgoA,dgoD,dgoT
dgt	dgt
dhaKLM	dhaK,dhaL,dhaM
dhaR	dhaR
diaA	diaA
dicA	dicA
dicB-ydfDE-insD-intQ	dicB,ydfD,ydfE,insD,intQ
dicC-ydfXW	dicC,ydfX,ydfW
dicF	dicF
dinB-yafNOP	dinB,yafN,yafO,yafP
dinD	dinD
dinG	dinG
dinI	dinI
dinJ-yafQ	dinJ,yafQ
dinQ	dinQ
djlA	djlA
dkgB	dkgB
dld	dld
dmlA	dmlA
dmlR	dmlR
dmsABC	dmsA,dmsB,dmsC
dnaAN-recF	dnaA,dnaN,recF
dnaB	dnaB
dnaK-tpke11-dnaJ	dnaK,tpke11,dnaJ
dnaQ	dnaQ
dnaX	dnaX
dosCP	dosC,dosP
dpiBA	dpiB,dpiA
dppABCDF	dppA,dppB,dppC,dppD,dppF
dps	dps
dsbB	dsbB
dsbD-yjdC	dsbD,yjdC
dsbG	dsbG
dsdC	dsdC
dsdXA	dsdX,dsdA
dsrA	dsrA
dsrB	dsrB
dtpA	dtpA
dtpB	dtpB
dtpC	dtpC
dtpD	dtpD
dusA	dusA
dusB-fis	dusB,fis
dusC	dusC
dut-slmA	dut,slmA
dxr	dxr
eaeH-insE-1EF-1F-1	eaeH,insE-1,insEF-1,insF-1
eamA	eamA
eamB	eamB
ebgAC	ebgA,ebgC
ebgR	ebgR
ecnAB	ecnA,ecnB
eco	eco
ecpA	ecpA
ecpBCDE	ecpB,ecpC,ecpD,ecpE
ecpR	ecpR
edd-eda	edd,eda
efeOB	efeO,efeB
efeU_1U_2	efeU_1,efeU_2
efp	efp
elaA	elaA
elaB	elaB
elaD	elaD
elbB-mtgA	elbB,mtgA
elfA	elfA
elfDCG-ycbUVF	elfD,elfC,elfG,ycbU,ycbV,ycbF
elyC	elyC
emrD	emrD
emrKY	emrK,emrY
emtA	emtA
endA	endA
entCEBAH	entC,entE,entB,entA,entH
entS	entS
envR	envR
envY-ompT	envY,ompT
epd-pgk-fbaA	epd,pgk,fbaA
epmA	epmA
epmB	epmB
eptA	eptA
eptB	eptB
eptC	eptC
erpA	erpA
esrE	esrE
essD-rrrD-rzpD	essD,rrrD,rzpD
essQ-ydfR-rrrQ-rzpQ	essQ,ydfR,rrrQ,rzpQ
ettA	ettA
eutBCLKR	eutB,eutC,eutL,eutK,eutR
eutHA	eutH,eutA
eutNEJG	eutN,eutE,eutJ,eutG
eutSPQTDM	eutS,eutP,eutQ,eutT,eutD,eutM
evgAS	evgA,evgS
exbBD	exbB,exbD
exuR	exuR
exuT	exuT
fabA	fabA
fabB	fabB
fabI	fabI
fabR-yijD	fabR,yijD
fadBA	fadB,fadA
fadD-sroD	fadD,sroD
fadE	fadE
fadH	fadH
fadIJ	fadI,fadJ
fadL	fadL
fadM	fadM
fadR	fadR
fbaB	fbaB
fbp	fbp
fdhD	fdhD
fdhF	fdhF
fdnGHI	fdnG,fdnH,fdnI
fdoGHI-fdhE	fdoG,fdoH,fdoI,fdhE
fdrA-ylbEF-ybcF	fdrA,ylbE,ylbF,ybcF
feaB	feaB
feaR	feaR
fecABCDE	fecA,fecB,fecC,fecD,fecE
fecIR	fecI,fecR
feoABC	feoA,feoB,feoC
fepA-entD	fepA,entD
fepB	fepB
fepDGC	fepD,fepG,fepC
fes-ybdZ-entF-fepE	fes,ybdZ,entF,fepE
fetAB	fetA,fetB
ffh	ffh
ffs	ffs
fhuACDB	fhuA,fhuC,fhuD,fhuB
fhuE	fhuE
fhuF	fhuF
ficA-fic-pabA	ficA,fic,pabA
fieF	fieF
fimAICDFGH	fimA,fimI,fimC,fimD,fimF,fimG,fimH
fimB	fimB
fimE	fimE
fimZ	fimZ
fiu	fiu
fixABCX	fixA,fixB,fixC,fixX
fklB	fklB
fkpA	fkpA
fldA-uof-fur	fldA,uof,fur
fldB	fldB
flgAMN	flgA,flgM,flgN
flgBCDEFGHIJ	flgB,flgC,flgD,flgE,flgF,flgG,flgH,flgI,flgJ
flgKL	flgK,flgL
flhBAE	flhB,flhA,flhE
flhDC	flhD,flhC
fliAZ-tcyJ	fliA,fliZ,tcyJ
fliC	fliC
fliDST	fliD,fliS,fliT
fliE	fliE
fliFGHIJK	fliF,fliG,fliH,fliI,fliJ,fliK
fliLMNOPQR	fliL,fliM,fliN,fliO,fliP,fliQ,fliR
flk	flk
flxA	flxA
fnr	fnr
fnrS	fnrS
focA-pflB	focA,pflB
folA	folA
folB	folB
folC-dedD	folC,dedD
folD-ybcJ	folD,ybcJ
folE-yeiB	folE,yeiB
folP-glmM	folP,glmM
folX-yfcH	folX,yfcH
fpr	fpr
frdABCD	frdA,frdB,frdC,frdD
fre	fre
frlABCDR	frlA,frlB,frlC,frlD,frlR
frmRAB	frmR,frmA,frmB
frr	frr
frsA	frsA
fruBKA	fruB,fruK,fruA
frvABXR	frvA,frvB,frvX,frvR
frwCB	frwC,frwB
frwD	frwD
fryBC-ypdFE-fryA	fryB,fryC,ypdF,ypdE,fryA
fsaA	fsaA
fsr	fsr
ftnA	ftnA
ftnB	ftnB
ftp	ftp
ftsB	ftsB
ftsK	ftsK
ftsP	ftsP
ftsYEX	ftsY,ftsE,ftsX
fucAO	fucA,fucO
fucPIKUR	fucP,fucI,fucK,fucU,fucR
fumAC	fumA,fumC
fxsA	fxsA
gadAXW	gadA,gadX,gadW
gadBC	gadB,gadC
gadEF-mdtEF	gadE,gadF,mdtE,mdtF
gadY	gadY
galETKM	galE,galT,galK,galM
galF	galF
galP	galP
galR	galR
galS	galS
galU	galU
gapA-yeaD	gapA,yeaD
gapC_1C_2	gapC_1,gapC_2
garD	garD
garPLRK-rnpB	garP,garL,garR,garK,rnpB
gatR_1	gatR_1
gatR_2	gatR_2
gatYZABCD	gatY,gatZ,gatA,gatB,gatC,gatD
gcd	gcd
gcl-hyi-glxR-ybbW-allB-ybbY-glxK	gcl,hyi,glxR,ybbW,allB,ybbY,glxK
gcvA	gcvA
gcvB	gcvB
gcvR	gcvR
gcvTHP	gcvT,gcvH,gcvP
gdhA	gdhA
gfcA	gfcA
gfcBCD	gfcB,gfcC,gfcD
gfcE-etp-etk	gfcE,etp,etk
ggt	ggt
ghoST	ghoS,ghoT
ghrA	ghrA
ghrB	ghrB
ghxP	ghxP
glcC	glcC
glcDEFGBA	glcD,glcE,glcF,glcG,glcB,glcA
glf-wbbH	glf,wbbH
glgBXCAP	glgB,glgX,glgC,glgA,glgP
glgS	glgS
glk	glk
glmUS	glmU,glmS
glmY	glmY
glmZ	glmZ
glnALG	glnA,glnL,glnG
glnHPQ	glnH,glnP,glnQ
glnK-amtB	glnK,amtB
glnS	glnS
gloB	gloB
glpABC	glpA,glpB,glpC
glpD	glpD
glpEGR	glpE,glpG,glpR
glpFKX	glpF,glpK,glpX
glpTQ	glpT,glpQ
glrK	glrK
glrR-glnB	glrR,glnB
gltA	gltA
gltBDF	gltB,gltD,gltF
gltI-sroC-gltJKL	gltI,sroC,gltJ,gltK,gltL
gltP	gltP
gltS	gltS
gltX	gltX
glvCBG-ysdC	glvC,glvB,glvG,ysdC
glyA	glyA
glyQS	glyQ,glyS
glyU	glyU
glyVXY	glyV,glyX,glyY
glyW-cysT-leuZ-3'ETS<sup><i>leuZ</i></sup>	glyW,cysT,leuZ,3'ETS<sup><i>leuZ</i></sup>
gmhB	gmhB
gmk	gmk
gnd	gnd
gnsB	gnsB
gntP	gntP
gntRKU	gntR,gntK,gntU
gntT	gntT
gntX-nfuA	gntX,nfuA
gor	gor
gpmA	gpmA
gpmM-envC-yibQ	gpmM,envC,yibQ
gpp	gpp
gpr	gpr
gpt	gpt
grcA	grcA
greA	greA
greB	greB
groSL	groS,groL
grpE	grpE
grxA	grxA
grxB	grxB
grxD	grxD
gshA	gshA
gsk	gsk
gspAB	gspA,gspB
gspCDEFGHIJKLMO	gspC,gspD,gspE,gspF,gspG,gspH,gspI,gspJ,gspK,gspL,gspM,gspO
gss	gss
gstA	gstA
gstB	gstB
guaBA	guaB,guaA
guaC	guaC
gudPXD	gudP,gudX,gudD
gyrA	gyrA
gyrB	gyrB
hcaEFCBD	hcaE,hcaF,hcaC,hcaB,hcaD
hcaR	hcaR
hcaT	hcaT
hchA	hchA
hcp-hcr	hcp,hcr
hda	hda
hdeAB-yhiD	hdeA,hdeB,yhiD
hdeD	hdeD
hdfR	hdfR
hdhA	hdhA
helD	helD
hemA-prfA-prmC	hemA,prfA,prmC
hemB	hemB
hemCDXY	hemC,hemD,hemX,hemY
hemH	hemH
hemL	hemL
hemN	hemN
hflD-purB	hflD,purB
hicAB	hicA,hicB
higBA	higB,higA
hinT-ycfL-lpoB-thiK-nagZ-ycfP	hinT,ycfL,lpoB,thiK,nagZ,ycfP
hipBA	hipB,hipA
hisLGDCBHAFI	hisL,hisG,hisD,hisC,hisB,hisH,hisA,hisF,hisI
hisS	hisS
hlyE	hlyE
hmp	hmp
hns	hns
hofMNOP	hofM,hofN,hofO,hofP
hofQ	hofQ
hokA	hokA
hokB	hokB
hokE	hokE
holC-valS	holC,valS
holD-rimI-yjjG	holD,rimI,yjjG
holE	holE
hpt	hpt
hrpA	hrpA
hrpB	hrpB
hscBA-fdx-iscX	hscB,hscA,fdx,iscX
hscC	hscC
hsdRMS	hsdR,hsdM,hsdS
hslJ	hslJ
hslVU	hslV,hslU
hspQ	hspQ
htgA	htgA
htpG	htpG
htpX	htpX
htrL	htrL
hupA	hupA
hupB	hupB
hyaABCDEF	hyaA,hyaB,hyaC,hyaD,hyaE,hyaF
hybOABCDEFG	hybO,hybA,hybB,hybC,hybD,hybE,hybF,hybG
hycABCDEFGHI	hycA,hycB,hycC,hycD,hycE,hycF,hycG,hycH,hycI
hydN-hypF	hydN,hypF
hyfABCDEFGHIJR-focB	hyfA,hyfB,hyfC,hyfD,hyfE,hyfF,hyfG,hyfH,hyfI,hyfJ,hyfR,focB
hypABCDE-fhlA	hypA,hypB,hypC,hypD,hypE,fhlA
hypT	hypT
hyuA	hyuA
iaaA-gsiABCD	iaaA,gsiA,gsiB,gsiC,gsiD
iap	iap
ibaG-murA	ibaG,murA
ibpAB	ibpA,ibpB
icd	icd
icdC	icdC
iclR	iclR
idi	idi
idnDOTR	idnD,idnO,idnT,idnR
idnK	idnK
ileX	ileX
ileY	ileY
ilvC	ilvC
ilvIH	ilvI,ilvH
ilvLXG_1G_2MEDA	ilvL,ilvX,ilvG_1,ilvG_2,ilvM,ilvE,ilvD,ilvA
ilvY	ilvY
inaA	inaA
infA	infA
insA-4AB-4B-4	insA-4,insAB-4,insB-4
insA-7	insA-7
insAB-1A-1B-1	insA-1,insAB-1,insB-1
insAB-2A-2B-2-afuBC	insA-2,insAB-2,insB-2,afuB,afuC
insAB-3A-3B-3	insA-3,insAB-3,insB-3
insAB-5A-5B-5	insA-5,insAB-5,insB-5
insB-7_1B-7_2	insB-7_1,insB-7_2
insC-1CD-1D-1	insC-1,insCD-1,insD-1
insC-5CD-5D-5-yqiGHI	insC-5,insCD-5,insD-5,yqiG,yqiH,yqiI
insC-6CD-6D-6	insC-6,insCD-6,insD-6
insCD-2C-2D-2	insC-2,insCD-2,insD-2
insCD-3C-3D-3	insC-3,insCD-3,insD-3
insCD-4C-4D-4-ygeONM	insC-4,insCD-4,insD-4,ygeO,ygeN,ygeM
insE-3EF-3F-3	insE-3,insEF-3,insF-3
insE-5EF-5F-5	insE-5,insEF-5,insF-5
insEF-2E-2F-2	insE-2,insEF-2,insF-2
insEF-4E-4F-4	insE-4,insEF-4,insF-4
insG	insG
insH-1	insH-1
insH-10	insH-10
insH-11	insH-11
insH-2	insH-2
insH-3	insH-3
insH-4	insH-4
insH-5	insH-5
insH-6	insH-6
insH-7	insH-7
insH-8	insH-8
insH-9	insH-9
insI-2	insI-2
insJ	insJ
insK	insK
insL-1	insL-1
insL-2	insL-2
insL-3	insL-3
insMI-3	insM,insI-3
insN-1I-1O-1	insN-1,insI-1,insO-1
insN-2	insN-2
insO-2-yjhWV	insO-2,yjhW,yjhV
intA	intA
intB	intB
intD	intD
intF	intF
intG	intG
intS	intS
intZ	intZ
iraD	iraD
iraM	iraM
iraP	iraP
iscRSUA	iscR,iscS,iscU,iscA
ispB	ispB
ispDF	ispD,ispF
ispG-sroE	ispG,sroE
ispU	ispU
isrB	isrB
isrC-flu	isrC,flu
istR-1	istR-1
istR-2	istR-2
ivbL-ilvBN-uhpABC	ivbL,ilvB,ilvN,uhpA,uhpB,uhpC
ivy	ivy
katE	katE
katG	katG
kbaZ-agaVWA	kbaZ,agaV,agaW,agaA
kbl-tdh	kbl,tdh
kch	kch
kdgK	kdgK
kdgR	kdgR
kdgT	kdgT
kdpDE	kdpD,kdpE
kdpFABC	kdpF,kdpA,kdpB,kdpC
kduD	kduD
kduI	kduI
kefFC	kefF,kefC
kefGB-yheV	kefG,kefB,yheV
kgtP	kgtP
kilR-ydaE	kilR,ydaE
kptA	kptA
kup	kup
lacZYA	lacZ,lacY,lacA
lafU	lafU
lapAB-pyrF-yciH	lapA,lapB,pyrF,yciH
ldcA	ldcA
ldcC	ldcC
ldhA	ldhA
ldrA	ldrA
ldrB	ldrB
ldrC	ldrC
ldrD	ldrD
ldtA	ldtA
ldtB	ldtB
ldtC	ldtC
ldtD	ldtD
ldtE	ldtE
lepAB	lepA,lepB
leuE	leuE
leuLABCD	leuL,leuA,leuB,leuC,leuD
leuO	leuO
leuQPV	leuQ,leuP,leuV
leuS-lptE-holA-nadD-cobC	leuS,lptE,holA,nadD,cobC
leuX	leuX
lexA-dinF	lexA,dinF
lfhA	lfhA
lgoD	lgoD
lgoR	lgoR
lgoT	lgoT
lgt-thyA	lgt,thyA
ligA-ypeB	ligA,ypeB
ligB	ligB
lipA	lipA
lit	lit
livJ	livJ
livKHMGF	livK,livH,livM,livG,livF
lldPRD	lldP,lldR,lldD
loiP	loiP
lolA-rarA	lolA,rarA
lolB-ispE-prs	lolB,ispE,prs
lolCDE	lolC,lolD,lolE
lomR_2-stfR-tfaR	lomR_2,stfR,tfaR
lpcA	lpcA
lpoA	lpoA
lpp	lpp
lptD-surA-pdxA-rsmA-apaGH	lptD,surA,pdxA,rsmA,apaG,apaH
lptFG	lptF,lptG
lpxL	lpxL
lpxM	lpxM
lpxP	lpxP
lrhA	lrhA
lrp	lrp
lsrACDBFG-tam	lsrA,lsrC,lsrD,lsrB,lsrF,lsrG,tam
lsrRK	lsrR,lsrK
luxS	luxS
lysA	lysA
lysC	lysC
lysO	lysO
lysP	lysP
lysQ	lysQ
lysR	lysR
lysT-valT-lysW	lysT,valT,lysW
lysU	lysU
lysZ	lysZ
maa	maa
macAB	macA,macB
maeA	maeA
maeB	maeB
mak	mak
malEFG	malE,malF,malG
malI	malI
malK-lamB-malM	malK,lamB,malM
malPQ	malP,malQ
malS	malS
malT	malT
malXY	malX,malY
malZ	malZ
manA	manA
manXYZ	manX,manY,manZ
maoP	maoP
map-glnD-dapD	map,glnD,dapD
marC	marC
marRAB	marR,marA,marB
matP	matP
mcaS	mcaS
mcbA	mcbA
mcbR	mcbR
mcrA	mcrA
mcrBC	mcrB,mcrC
mdaB	mdaB
mdfA	mdfA
mdh	mdh
mdlAB	mdlA,mdlB
mdtABCD-baeSR	mdtA,mdtB,mdtC,mdtD,baeS,baeR
mdtG	mdtG
mdtH	mdtH
mdtJI	mdtJ,mdtI
mdtK	mdtK
mdtL	mdtL
mdtM-yjiN	mdtM,yjiN
mdtNOP	mdtN,mdtO,mdtP
mdtQ	mdtQ
melAB	melA,melB
melR	melR
menA-rraA	menA,rraA
menFDHBCE	menF,menD,menH,menB,menC,menE
mepH	mepH
mepM	mepM
mepS	mepS
metA	metA
metBL	metB,metL
metC	metC
metE	metE
metF	metF
metG	metG
metH	metH
metJ	metJ
metK	metK
metNIQ	metN,metI,metQ
metR	metR
metT-leuW-glnUW-metU-glnVX	metT,leuW,glnU,glnW,metU,glnV,glnX
metY-rimP-nusA-infB-rbfA-truB-rpsO-pnp	metY,rimP,nusA,infB,rbfA,truB,rpsO,pnp
metZWV	metZ,metW,metV
mfd	mfd
mglBAC	mglB,mglA,mglC
mgrB	mgrB
mgrR	mgrR
mgsA	mgsA
mgtLA	mgtL,mgtA
mhpABCDFE	mhpA,mhpB,mhpC,mhpD,mhpF,mhpE
mhpR-lacI	mhpR,lacI
mhpT	mhpT
miaB	miaB
micA	micA
micC	micC
micF	micF
micL	micL
minCDE	minC,minD,minE
mipA	mipA
mlaA	mlaA
mlaFEDCB	mlaF,mlaE,mlaD,mlaC,mlaB
mlc-ynfK	mlc,ynfK
mliC	mliC
mlrA	mlrA
mltA	mltA
mltB	mltB
mltD	mltD
mltF	mltF
mmuPM	mmuP,mmuM
mnaT-ydcZ	mnaT,ydcZ
mngAB	mngA,mngB
mngR	mngR
mnmA	mnmA
mnmC	mnmC
mnmE	mnmE
mntH	mntH
mntP	mntP
mntR-ybiR	mntR,ybiR
moaABCDE	moaA,moaB,moaC,moaD,moaE
mobAB	mobA,mobB
mocA	mocA
modABC	modA,modB,modC
modEF	modE,modF
moeAB	moeA,moeB
mog	mog
mokB	mokB
mokC-hokC	mokC,hokC
molR_1	molR_1
molR_2	molR_2
molR_3-yehI	molR_3,yehI
motAB-cheAW	motA,motB,cheA,cheW
mpl	mpl
mppA	mppA
mprA-emrAB	mprA,emrA,emrB
mqo	mqo
mqsRA	mqsR,mqsA
mraZ-rsmH-ftsLI-murEF-mraY-murD-ftsW-murGC-ddlB-ftsQAZ-lpxC	mraZ,rsmH,ftsL,ftsI,murE,murF,mraY,murD,ftsW,murG,murC,ddlB,ftsQ,ftsA,ftsZ,lpxC
mrcA	mrcA
mrcB	mrcB
mreBCD	mreB,mreC,mreD
mrp	mrp
mrr	mrr
mscK	mscK
mscL	mscL
mscS	mscS
msrA	msrA
msrB	msrB
msrC	msrC
msrPQ	msrP,msrQ
msyB	msyB
mtfA	mtfA
mtlADR	mtlA,mtlD,mtlR
mtn-btuF-yadS	mtn,btuF,yadS
mtr	mtr
mug	mug
murB-birA	murB,birA
murJ	murJ
murQP-yfeW	murQ,murP,yfeW
murR	murR
mutH	mutH
mutS	mutS
mutY-yggX-mltC-nupG	mutY,yggX,mltC,nupG
nac	nac
nadA-pnuC	nadA,pnuC
nadB	nadB
nadC	nadC
nadE	nadE
nadK	nadK
nagBAC-umpH	nagB,nagA,nagC,umpH
nagE	nagE
nagK-cobB	nagK,cobB
nanATEK-yhcH	nanA,nanT,nanE,nanK,yhcH
nanCMS	nanC,nanM,nanS
nanR	nanR
napFDAGHBC-ccmABCDEFGH	napF,napD,napA,napG,napH,napB,napC,ccmA,ccmB,ccmC,ccmD,ccmE,ccmF,ccmG,ccmH
narGHJI	narG,narH,narJ,narI
narK	narK
narP	narP
narQ	narQ
narU	narU
narXL	narX,narL
narZYWV	narZ,narY,narW,narV
ndh	ndh
ndk	ndk
nemRA-gloA	nemR,nemA,gloA
nepI	nepI
nfo	nfo
nfrBA	nfrB,nfrA
nfsB	nfsB
nhaAR	nhaA,nhaR
nhaB	nhaB
nhoA	nhoA
nikABCDER	nikA,nikB,nikC,nikD,nikE,nikR
nimR	nimR
nimT	nimT
nirBDC-cysG	nirB,nirD,nirC,cysG
nlpA	nlpA
nlpC	nlpC
nlpD-rpoS	nlpD,rpoS
nlpI	nlpI
nmpC	nmpC
nohA-ydfN-tfaQ	nohA,ydfN,tfaQ
nohB	nohB
norR	norR
norVW	norV,norW
nrdAB-yfaE	nrdA,nrdB,yfaE
nrdDG	nrdD,nrdG
nrdHIEF	nrdH,nrdI,nrdE,nrdF
nrdR-ribDE-nusB-thiL-pgpA	nrdR,ribD,ribE,nusB,thiL,pgpA
nrfABCDEFG	nrfA,nrfB,nrfC,nrfD,nrfE,nrfF,nrfG
nsrR-rnr-rlmB-yjfIJ	nsrR,rnr,rlmB,yjfI,yjfJ
nudB-yebC-ruvC	nudB,yebC,ruvC
nudC-hemE-nfi	nudC,hemE,nfi
nudE	nudE
nudF-yqiB-cpdA-yqiA-parE	nudF,yqiB,cpdA,yqiA,parE
nudG	nudG
nudI	nudI
nudK	nudK
nuoABCEFGHIJKLMN	nuoA,nuoB,nuoC,nuoE,nuoF,nuoG,nuoH,nuoI,nuoJ,nuoK,nuoL,nuoM,nuoN
nupC	nupC
nupX	nupX
ogrK	ogrK
ohsC	ohsC
ompA	ompA
ompC	ompC
ompF	ompF
ompG	ompG
ompL	ompL
ompR-envZ	ompR,envZ
ompW	ompW
ompX	ompX
omrA	omrA
omrB	omrB
opgB	opgB
opgC	opgC
opgD	opgD
opgE	opgE
opgGH	opgG,opgH
oppABCDF	oppA,oppB,oppC,oppD,oppF
orn	orn
ortT	ortT
osmB	osmB
osmC	osmC
osmE	osmE
osmF-yehYXW	osmF,yehY,yehX,yehW
osmY	osmY
otsBA	otsB,otsA
oxyR	oxyR
oxyS	oxyS
paaABCDEFGHIJK	paaA,paaB,paaC,paaD,paaE,paaF,paaG,paaH,paaI,paaJ,paaK
paaXY	paaX,paaY
paaZ	paaZ
pabB-nudL	pabB,nudL
pabC-mltG-tmk-holB-ycfH	pabC,mltG,tmk,holB,ycfH
pagP	pagP
panBC	panB,panC
panD	panD
panE-yajL	panE,yajL
panZ	panZ
paoABCD	paoA,paoB,paoC,paoD
parC	parC
patA	patA
pbl	pbl
pbpG	pbpG
pck	pck
pcnB-folK	pcnB,folK
pdeA	pdeA
pdeB	pdeB
pdeC	pdeC
pdeD	pdeD
pdeF	pdeF
pdeG	pdeG
pdeH	pdeH
pdeI-dgcI	pdeI,dgcI
pdeK	pdeK
pdeL	pdeL
pdeN	pdeN
pdeR	pdeR
pdhR-aceEF-lpd	pdhR,aceE,aceF,lpd
pdxB-usg-truA-dedA	pdxB,usg,truA,dedA
pdxH-tyrS-pdxY	pdxH,tyrS,pdxY
pdxK	pdxK
pepA	pepA
pepB	pepB
pepD	pepD
pepE	pepE
pepN	pepN
pepQ-yigZ-trkH-hemG	pepQ,yigZ,trkH,hemG
pepT	pepT
perR	perR
pfkA	pfkA
pfkB	pfkB
pflA	pflA
pflDC	pflD,pflC
pgaABCD	pgaA,pgaB,pgaC,pgaD
pgi	pgi
pgl	pgl
pgpB	pgpB
pgpC-tadA	pgpC,tadA
pgrR	pgrR
pgsA	pgsA
pheLA	pheL,pheA
pheP	pheP
pheU	pheU
pheV	pheV
phnCDE_1E_2FGHIJKLMNOP	phnC,phnD,phnE_1,phnE_2,phnF,phnG,phnH,phnI,phnJ,phnK,phnL,phnM,phnN,phnO,phnP
phoA-psiF	phoA,psiF
phoBR	phoB,phoR
phoE	phoE
phoH	phoH
phoPQ	phoP,phoQ
pinE	pinE
pinH	pinH
pinQ	pinQ
pinR	pinR
pitA	pitA
pitB	pitB
plaP	plaP
pldA	pldA
pldB-yigL	pldB,yigL
pliG	pliG
plsB	plsB
plsC	plsC
pmbA	pmbA
pmrD	pmrD
pncB	pncB
pncC	pncC
pntAB	pntA,pntB
polA	polA
polB	polB
potABCD	potA,potB,potC,potD
potFGHI	potF,potG,potH,potI
poxB-ltaE-ybjT	poxB,ltaE,ybjT
ppa	ppa
ppc	ppc
ppdAB-ygdB-ppdC-recC	ppdA,ppdB,ygdB,ppdC,recC
ppdD-hofBC	ppdD,hofB,hofC
pphA	pphA
pphB	pphB
ppiA	ppiA
ppiB-lpxH	ppiB,lpxH
ppiC	ppiC
ppiD	ppiD
ppk-ppx	ppk,ppx
pppA	pppA
ppsA	ppsA
ppsR	ppsR
pptA	pptA
pqiAB	pqiA,pqiB
pqqL	pqqL
preTA	preT,preA
prfC	prfC
priA	priA
priC-ybaM	priC,ybaM
prkB	prkB
prlC-rsmJ	prlC,rsmJ
prlF-yhaV	prlF,yhaV
prmB-aroC-mepA-yfcA-epmC-yfcL	prmB,aroC,mepA,yfcA,epmC,yfcL
proBA	proB,proA
proC	proC
proK	proK
proL	proL
proP	proP
proQ-prc	proQ,prc
proS	proS
proVWX	proV,proW,proX
prpBCDE	prpB,prpC,prpD,prpE
prpR	prpR
psd-mscM	psd,mscM
psiE	psiE
pspABCDE	pspA,pspB,pspC,pspD,pspE
pspF	pspF
pspG	pspG
pssA	pssA
pstSCAB-phoU	pstS,pstC,pstA,pstB,phoU
psuKG	psuK,psuG
psuT	psuT
pth-ychF	pth,ychF
ptrA-recBD	ptrA,recB,recD
ptrB	ptrB
ptsA-fsaB-gldA	ptsA,fsaB,gldA
ptsG	ptsG
ptsHI-crr	ptsH,ptsI,crr
purA	purA
purC	purC
purEK	purE,purK
purHD	purH,purD
purL	purL
purMN	purM,purN
purR	purR
purT	purT
purU	purU
putA	putA
putP	putP
puuAP	puuA,puuP
puuDRCBE	puuD,puuR,puuC,puuB,puuE
pykA	pykA
pykF	pykF
pyrC	pyrC
pyrD	pyrD
pyrG-eno	pyrG,eno
pyrH	pyrH
pyrLBI	pyrL,pyrB,pyrI
qmcA-ybbJ	qmcA,ybbJ
qor	qor
qorB	qorB
qseBC	qseB,qseC
qseG	qseG
queA	queA
queC	queC
queD	queD
queE	queE
queF	queF
queG	queG
racC	racC
racR	racR
radD	radD
raiA	raiA
ralA	ralA
rapA-rluA	rapA,rluA
rarD	rarD
ratAB	ratA,ratB
ravA-viaA	ravA,viaA
rayT	rayT
rbn	rbn
rbsDACBKR	rbsD,rbsA,rbsC,rbsB,rbsK,rbsR
rcdA	rcdA
rclABC	rclA,rclB,rclC
rclR	rclR
rcnAB	rcnA,rcnB
rcnR	rcnR
rcsA	rcsA
rcsC	rcsC
rcsDB	rcsD,rcsB
rcsF-trmO	rcsF,trmO
rdgC	rdgC
rdlA	rdlA
rdlB	rdlB
rdlC	rdlC
rdlD	rdlD
rdoA-dsbA	rdoA,dsbA
recAX	recA,recX
recET-ralR-ydaC-xisR-intR	recE,recT,ralR,ydaC,xisR,intR
recN	recN
recQ	recQ
relA-mazEFG	relA,mazE,mazF,mazG
relBE-hokD	relB,relE,hokD
rem	rem
renD-emrE	renD,emrE
rep	rep
rfaD-waaFCL	rfaD,waaF,waaC,waaL
rfaE	rfaE
rfaH	rfaH
rfbBDACX	rfbB,rfbD,rfbA,rfbC,rfbX
rfe-wzzE-wecBC-rffGHC-wecE-wzxE-rffT-wzyE-rffM	rfe,wzzE,wecB,wecC,rffG,rffH,rffC,wecE,wzxE,rffT,wzyE,rffM
rhaBAD	rhaB,rhaA,rhaD
rhaM	rhaM
rhaSR	rhaS,rhaR
rhaT	rhaT
rhlB	rhlB
rhlE	rhlE
rhoL-rho	rhoL,rho
rhsA-yibA	rhsA,yibA
rhsB	rhsB
rhsC-ybfB	rhsC,ybfB
rhsD-ybbC-ylbH-ybbD	rhsD,ybbC,ylbH,ybbD
rhsE-ydcD	rhsE,ydcD
rhtA	rhtA
rhtB	rhtB
rhtC	rhtC
ribA	ribA
ribC	ribC
ribF-ileS-lspA-fkpB-ispH	ribF,ileS,lspA,fkpB,ispH
ridA	ridA
rihA	rihA
rihB	rihB
rihC	rihC
rimJ	rimJ
rimL	rimL
rimO	rimO
rirA-waaQGPSBOJYZU	rirA,waaQ,waaG,waaP,waaS,waaB,waaO,waaJ,waaY,waaZ,waaU
rlmA	rlmA
rlmD	rlmD
rlmE-ftsH	rlmE,ftsH
rlmF	rlmF
rlmG	rlmG
rlmI	rlmI
rlmJ	rlmJ
rlmL-uup	rlmL,uup
rlmM	rlmM
rlmN	rlmN
rluB	rluB
rluC	rluC
rluD-yfiH	rluD,yfiH
rluE-nudJ	rluE,nudJ
rluF	rluF
rmf	rmf
rmuC	rmuC
rna	rna
rnb	rnb
rnc-era-recO-pdxJ-acpS	rnc,era,recO,pdxJ,acpS
rnd	rnd
rne	rne
rnhA	rnhA
rnk	rnk
rnlAB	rnlA,rnlB
rnt-lhr	rnt,lhr
rob	rob
rodZ	rodZ
roxA	roxA
rph-pyrE	rph,pyrE
rpiA	rpiA
rpiB	rpiB
rpiR-alsBACE	rpiR,alsB,alsA,alsC,alsE
rplKAJL-rpoBC	rplK,rplA,rplJ,rplL,rpoB,rpoC
rplM-rpsI	rplM,rpsI
rplNXE-rpsNH-rplFR-rpsE-rpmD-rplO-secY-rpmJ	rplN,rplX,rplE,rpsN,rpsH,rplF,rplR,rpsE,rpmD,rplO,secY,rpmJ
rplU-rpmA-yhbE-obgE	rplU,rpmA,yhbE,obgE
rplY	rplY
rpmE	rpmE
rpmH-rnpA	rpmH,rnpA
rpoE-rseABC	rpoE,rseA,rseB,rseC
rpoH	rpoH
rpoZ-spoT-trmH-recG	rpoZ,spoT,trmH,recG
rppH-ptsP	rppH,ptsP
rprA	rprA
rpsF-priB-rpsR-rplI	rpsF,priB,rpsR,rplI
rpsJ-rplCDWB-rpsS-rplV-rpsC-rplP-rpmC-rpsQ	rpsJ,rplC,rplD,rplW,rplB,rpsS,rplV,rpsC,rplP,rpmC,rpsQ
rpsLG-fusA-tufA	rpsL,rpsG,fusA,tufA
rpsMKD-rpoA-rplQ	rpsM,rpsK,rpsD,rpoA,rplQ
rpsP-rimM-trmD-rplS	rpsP,rimM,trmD,rplS
rpsT	rpsT
rpsU-dnaG-rpoD	rpsU,dnaG,rpoD
rraB	rraB
rrsA-ileT-alaT-rrlA-rrfA	rrsA,ileT,alaT,rrlA,rrfA
rrsB-gltT-rrlB-rrfB	rrsB,gltT,rrlB,rrfB
rrsC-gltU-rrlC-rrfC	rrsC,gltU,rrlC,rrfC
rrsD-ileU-alaU-rrlD-rrfD-thrV-rrfF	rrsD,ileU,alaU,rrlD,rrfD,thrV,rrfF
rrsE-gltV-rrlE-rrfE	rrsE,gltV,rrlE,rrfE
rrsG-gltW-rrlG-rrfG	rrsG,gltW,rrlG,rrfG
rrsH-ileV-alaV-rrlH-rrfH	rrsH,ileV,alaV,rrlH,rrfH
rsd	rsd
rseP	rseP
rseX	rseX
rsfS-rlmH-mrdAB-rlpA	rsfS,rlmH,mrdA,mrdB,rlpA
rsgA	rsgA
rsmB	rsmB
rsmC	rsmC
rsmD-yhhL	rsmD,yhhL
rsmE-gshB	rsmE,gshB
rsmF	rsmF
rsmI	rsmI
rspAB	rspA,rspB
rssAB	rssA,rssB
rstAB	rstA,rstB
rsuA	rsuA
rtcBA	rtcB,rtcA
rtcR	rtcR
rttR	rttR
rutABCDEFG	rutA,rutB,rutC,rutD,rutE,rutF,rutG
rutR	rutR
ruvAB	ruvA,ruvB
rybA-mntS	rybA,mntS
rybB	rybB
rydB	rydB
rydC	rydC
ryeA	ryeA
ryfA	ryfA
ryfD	ryfD
ryhB	ryhB
ryjA	ryjA
ryjB	ryjB
rzoD	rzoD
rzoR	rzoR
sad	sad
safA-ydeO	safA,ydeO
sanA-yeiS	sanA,yeiS
sapABCDF	sapA,sapB,sapC,sapD,sapF
satP	satP
sbcB	sbcB
sbcDC	sbcD,sbcC
sbmA-yaiW	sbmA,yaiW
sbmC	sbmC
sbp	sbp
scpA-argK-scpBC	scpA,argK,scpB,scpC
sdaA	sdaA
sdaCB	sdaC,sdaB
sdhCDAB-sucABCD	sdhC,sdhD,sdhA,sdhB,sucA,sucB,sucC,sucD
sdhE-cptA	sdhE,cptA
sdiA	sdiA
sdsN	sdsN
sdsR	sdsR
secE-nusG	secE,nusG
secG-leuU	secG,leuU
secMA-mutT	secM,secA,mutT
selAB	selA,selB
selC	selC
selU	selU
seqA-pgm	seqA,pgm
serA	serA
serB-radA-nadR	serB,radA,nadR
serC-aroA	serC,aroA
serS	serS
serT	serT
serU	serU
serV-argVYZQ	serV,argV,argY,argZ,argQ
serW	serW
serX	serX
setB	setB
setC	setC
sfmA	sfmA
sfmCD	sfmC,sfmD
sfmHF	sfmH,sfmF
sfsA-dksA-gluQ	sfsA,dksA,gluQ
sfsB	sfsB
sgcXBCQAER	sgcX,sgcB,sgcC,sgcQ,sgcA,sgcE,sgcR
sgrR-sroA-tbpA-thiPQ	sgrR,sroA,tbpA,thiP,thiQ
sgrST-setA	sgrS,sgrT,setA
shiA	shiA
shoB	shoB
sibA	sibA
sibB	sibB
sibC	sibC
sibD	sibD
sibE	sibE
sieB	sieB
sixA	sixA
slp-dctR	slp,dctR
slt	slt
slyA	slyA
slyB	slyB
slyD	slyD
slyX	slyX
smf	smf
smg	smg
smpB	smpB
smrA	smrA
smrB	smrB
sodA	sodA
sodB	sodB
sodC	sodC
sohB	sohB
sokB	sokB
sokC	sokC
solA-yceO	solA,yceO
soxR	soxR
soxS	soxS
speAB	speA,speB
speC	speC
speF-potE	speF,potE
spf	spf
sppA	sppA
spy	spy
sraA	sraA
sraB	sraB
sraG	sraG
srlAEBD-gutM-srlR-gutQ	srlA,srlE,srlB,srlD,gutM,srlR,gutQ
srmB	srmB
sroG-ribB	sroG,ribB
sroH	sroH
ssb	ssb
sseA	sseA
sseB	sseB
sspAB	sspA,sspB
ssrA	ssrA
ssrS-fau	ssrS,fau
sstT	sstT
ssuEADCB	ssuE,ssuA,ssuD,ssuC,ssuB
stfE-tfaE	stfE,tfaE
sthA	sthA
stpA	stpA
sufABCDSE	sufA,sufB,sufC,sufD,sufS,sufE
sugE	sugE
suhB	suhB
sulA	sulA
sutR	sutR
sxy	sxy
syd	syd
symE	symE
symR	symR
tabA	tabA
tag-yiaC	tag,yiaC
talA-tktB	talA,tktB
talB	talB
tamAB-ytfP	tamA,tamB,ytfP
tar-tap-cheRBYZ	tar,tap,cheR,cheB,cheY,cheZ
tas	tas
tatABCD	tatA,tatB,tatC,tatD
tatE	tatE
tauABCD	tauA,tauB,tauC,tauD
tcdA	tcdA
tcyP	tcyP
tdcABCDEFG	tdcA,tdcB,tdcC,tdcD,tdcE,tdcF,tdcG
tdcR	tdcR
tdk	tdk
tehAB	tehA,tehB
tesA-ybbO	tesA,ybbO
tesB	tesB
tfaD	tfaD
tfaS	tfaS
tfaX	tfaX
tff-rpsB-tsf	tff,rpsB,tsf
tgt-yajC-secDF	tgt,yajC,secD,secF
thiCEFSGH	thiC,thiE,thiF,thiS,thiG,thiH
thiI	thiI
thiMD	thiM,thiD
thpR	thpR
thrLABC	thrL,thrA,thrB,thrC
thrS-infC-rpmI-rplT-pheMST-ihfA	thrS,infC,rpmI,rplT,pheM,pheS,pheT,ihfA
thrU-tyrU-glyT-thrT-tufB	thrU,tyrU,glyT,thrT,tufB
thrW	thrW
tig	tig
tilS	tilS
tisB	tisB
tktA	tktA
tldD	tldD
tnaCAB	tnaC,tnaA,tnaB
tolB-pal-cpoB	tolB,pal,cpoB
tolC-ygiABC	tolC,ygiA,ygiB,ygiC
tomB-hha	tomB,hha
tonB	tonB
topA	topA
topAI-yjhQ	topAI,yjhQ
torCAD	torC,torA,torD
torI	torI
torR	torR
torS	torS
torT	torT
torYZ	torY,torZ
tp2	tp2
tpiA	tpiA
tpke70	tpke70
tpx	tpx
tqsA	tqsA
treA	treA
treBC	treB,treC
treF	treF
treR	treR
trg	trg
trkA	trkA
trkG	trkG
trmA	trmA
trmI-yggL	trmI,yggL
trmJ	trmJ
trmL	trmL
trpLEDCBA	trpL,trpE,trpD,trpC,trpB,trpA
trpR	trpR
trpT	trpT
truD	truD
trxA	trxA
trxB	trxB
trxC	trxC
tsaB-yeaY	tsaB,yeaY
tsaD	tsaD
tsgA	tsgA
tsr	tsr
tsx	tsx
ttcA	ttcA
ttdABT	ttdA,ttdB,ttdT
ttdR	ttdR
tus	tus
tusA	tusA
tusE	tusE
tynA	tynA
tyrB	tyrB
tyrP	tyrP
tyrTV-tpr	tyrT,tyrV,tpr
uacT	uacT
ubiCA	ubiC,ubiA
ubiD	ubiD
ubiEJB	ubiE,ubiJ,ubiB
ubiF	ubiF
ubiG	ubiG
ucpA	ucpA
udk-dcd	udk,dcd
udp	udp
ugd	ugd
ugpBAECQ	ugpB,ugpA,ugpE,ugpC,ugpQ
uhpT	uhpT
uidABC	uidA,uidB,uidC
uidR	uidR
ulaABCDEF	ulaA,ulaB,ulaC,ulaD,ulaE,ulaF
ulaG	ulaG
ulaR	ulaR
umpG-pcm	umpG,pcm
umuDC	umuD,umuC
ung	ung
upp-uraA	upp,uraA
ushA	ushA
uspA	uspA
uspB	uspB
uspC	uspC
uspE	uspE
uspF	uspF
uspG	uspG
uvrA	uvrA
uvrB	uvrB
uvrD	uvrD
uvrYC	uvrY,uvrC
uxaB	uxaB
uxaCA	uxaC,uxaA
uxuAB	uxuA,uxuB
uxuR	uxuR
valUXY-lysV	valU,valX,valY,lysV
valVW	valV,valW
valZ-lysY	valZ,lysY
ves	ves
waaA-coaD	waaA,coaD
waaH	waaH
wbbIJK	wbbI,wbbJ,wbbK
wbbL_2	wbbL_2
wcaCDEF-gmd-fcl-gmm-wcaI-cpsBG-wcaJ-wzxC	wcaC,wcaD,wcaE,wcaF,gmd,fcl,gmm,wcaI,cpsB,cpsG,wcaJ,wzxC
wcaKLM	wcaK,wcaL,wcaM
wecH	wecH
wrbA-yccJ	wrbA,yccJ
wza-wzb-wzc-wcaAB	wza,wzb,wzc,wcaA,wcaB
wzzB	wzzB
xanP	xanP
xanQ-guaD-ghxQ	xanQ,guaD,ghxQ
xapAB	xapA,xapB
xapR	xapR
xdhABC	xdhA,xdhB,xdhC
xerD-dsbC-recJ-prfB-lysS	xerD,dsbC,recJ,prfB,lysS
xseA	xseA
xseB-ispA-dxs-yajO	xseB,ispA,dxs,yajO
xthA	xthA
xylAB	xylA,xylB
xylE	xylE
xylFGHR	xylF,xylG,xylH,xylR
yaaA	yaaA
yaaI	yaaI
yaaJ	yaaJ
yaaU	yaaU
yaaW	yaaW
yaaX	yaaX
yabI	yabI
yabPQ	yabP,yabQ
yacC-speED	yacC,speE,speD
yacH	yacH
yacL	yacL
yadD	yadD
yadE	yadE
yadGH	yadG,yadH
yadI	yadI
yadMLKC	yadM,yadL,yadK,yadC
yadN	yadN
yadV-htrE	yadV,htrE
yaeF	yaeF
yaeH	yaeH
yaeI	yaeI
yaeP-rof	yaeP,rof
yaeQ-arfB-nlpE	yaeQ,arfB,nlpE
yaeR	yaeR
yafC	yafC
yafDE	yafD,yafE
yafF	yafF
yafJ	yafJ
yafK	yafK
yafL	yafL
yafS	yafS
yafT	yafT
yafU	yafU
yafV	yafV
yafY-ykfBF-yafX-ykfGH-yafW-ykfI	yafY,ykfB,ykfF,yafX,ykfG,ykfH,yafW,ykfI
yagAB-insX	yagA,yagB,insX
yagEF	yagE,yagF
yagGH	yagG,yagH
yagI	yagI
yagJ	yagJ
yagK	yagK
yagML	yagM,yagL
yagN	yagN
yagP	yagP
yagU	yagU
yahB	yahB
yahC	yahC
yahDEFG	yahD,yahE,yahF,yahG
yahH	yahH
yahIJ	yahI,yahJ
yahK	yahK
yahL	yahL
yahM	yahM
yahN	yahN
yahO	yahO
yaiE	yaiE
yaiF	yaiF
yaiI	yaiI
yaiL	yaiL
yaiP	yaiP
yaiS	yaiS
yaiT	yaiT
yaiU	yaiU
yaiV	yaiV
yaiXO	yaiX,yaiO
yaiY	yaiY
yaiZ	yaiZ
yajD	yajD
yajG-ampG	yajG,ampG
yajI	yajI
yajQ	yajQ
yajR	yajR
ybaA	ybaA
ybaB-recR	ybaB,recR
ybaE	ybaE
ybaK	ybaK
ybaL	ybaL
ybaN	ybaN
ybaP	ybaP
ybaQ	ybaQ
ybaST	ybaS,ybaT
ybaV	ybaV
ybaY	ybaY
ybbAP	ybbA,ybbP
ybbN	ybbN
ybcC	ybcC
ybcD	ybcD
ybcH	ybcH
ybcI	ybcI
ybcK	ybcK
ybcLM	ybcL,ybcM
ybcN-ninE-ybcO-rusA-ylcG	ybcN,ninE,ybcO,rusA,ylcG
ybcQ	ybcQ
ybcV	ybcV
ybcW	ybcW
ybcY	ybcY
ybdD	ybdD
ybdF	ybdF
ybdG	ybdG
ybdH	ybdH
ybdJ	ybdJ
ybdK	ybdK
ybdL	ybdL
ybdM	ybdM
ybdN	ybdN
ybdO	ybdO
ybdR	ybdR
ybeD-lipB	ybeD,lipB
ybeF	ybeF
ybeL	ybeL
ybeM_1M_2	ybeM_1,ybeM_2
ybeQ	ybeQ
ybeR-djlB	ybeR,djlB
ybeT	ybeT
ybeU-djlC	ybeU,djlC
ybeZYX-lnt	ybeZ,ybeY,ybeX,lnt
ybfA	ybfA
ybfD	ybfD
ybfE	ybfE
ybfF	ybfF
ybfHG	ybfH,ybfG
ybfL	ybfL
ybfOC	ybfO,ybfC
ybfP	ybfP
ybfQ	ybfQ
ybgA-phr	ybgA,phr
ybgC-tolQRA	ybgC,tolQ,tolR,tolA
ybgD	ybgD
ybgIJKL-nei	ybgI,ybgJ,ybgK,ybgL,nei
ybgQPO	ybgQ,ybgP,ybgO
ybgS	ybgS
ybhA	ybhA
ybhB	ybhB
ybhC	ybhC
ybhD	ybhD
ybhH	ybhH
ybhI	ybhI
ybhJ	ybhJ
ybhK	ybhK
ybhL	ybhL
ybhM	ybhM
ybhP-clsB-ybhN	ybhP,clsB,ybhN
ybhQ	ybhQ
ybiA	ybiA
ybiB	ybiB
ybiC	ybiC
ybiI	ybiI
ybiJ	ybiJ
ybiO	ybiO
ybiT	ybiT
ybiU	ybiU
ybiV	ybiV
ybiX	ybiX
ybiYW	ybiY,ybiW
ybjC-nfsA-rimK-ybjN	ybjC,nfsA,rimK,ybjN
ybjD	ybjD
ybjG	ybjG
ybjH	ybjH
ybjJI	ybjJ,ybjI
ybjL	ybjL
ybjM	ybjM
ybjO-rlmC	ybjO,rlmC
ybjP	ybjP
ybjQ-amiD	ybjQ,amiD
ybjS	ybjS
ybjX	ybjX
ycaC	ycaC
ycaD	ycaD
ycaI-msbA-lpxK-ycaQ	ycaI,msbA,lpxK,ycaQ
ycaK	ycaK
ycaL	ycaL
ycaM	ycaM
ycaN	ycaN
ycaO	ycaO
ycaP	ycaP
ycaR-kdsB	ycaR,kdsB
ycbJ	ycbJ
ycbK-gloC	ycbK,gloC
ycbX	ycbX
ycbZ	ycbZ
yccA	yccA
yccE	yccE
yccFS	yccF,yccS
yccM	yccM
yccT	yccT
yccU	yccU
yccX	yccX
ycdXY	ycdX,ycdY
ycdZ	ycdZ
yceA	yceA
yceB	yceB
yceD-rpmF-plsX-fabHDG-acpP-fabF	yceD,rpmF,plsX,fabH,fabD,fabG,acpP,fabF
yceF	yceF
yceH	yceH
yceJI	yceJ,yceI
yceK	yceK
yceM	yceM
yceQ	yceQ
ycfJ	ycfJ
ycfT	ycfT
ycgB	ycgB
ycgH_1	ycgH_1
ycgH_2	ycgH_2
ycgJ	ycgJ
ycgL	ycgL
ycgM	ycgM
ycgN	ycgN
ycgR	ycgR
ycgV	ycgV
ycgX	ycgX
ycgY	ycgY
ycgZ-ymgA-ariR-ymgC	ycgZ,ymgA,ariR,ymgC
ychE	ychE
ychE_2-yhcF	ychE_2,yhcF
ychG_1G_2	ychG_1,ychG_2
ychH	ychH
ychJ	ychJ
ychN	ychN
ychO	ychO
ychQA-kdsA	ychQ,ychA,kdsA
ychS	ychS
yciA	yciA
yciCB	yciC,yciB
yciGFE	yciG,yciF,yciE
yciI	yciI
yciK-btuR	yciK,btuR
yciN	yciN
yciVOQ	yciV,yciO,yciQ
yciW	yciW
yciY	yciY
yciZT	yciZ,yciT
ycjD	ycjD
ycjG	ycjG
ycjMNOPQRSTUV-ymjB	ycjM,ycjN,ycjO,ycjP,ycjQ,ycjR,ycjS,ycjT,ycjU,ycjV,ymjB
ycjW	ycjW
ycjXF-tyrR	ycjX,ycjF,tyrR
ycjY-ymjDC-mpaA	ycjY,ymjD,ymjC,mpaA
ydaGF	ydaG,ydaF
ydaN	ydaN
ydaSTUVW-rzpR	ydaS,ydaT,ydaU,ydaV,ydaW,rzpR
ydbA_1	ydbA_1
ydbA_2	ydbA_2
ydbC	ydbC
ydbD	ydbD
ydbH-ynbE-ydbL	ydbH,ynbE,ydbL
ydbJ	ydbJ
ydbK-ompN	ydbK,ompN
ydcA	ydcA
ydcC	ydcC
ydcF	ydcF
ydcH	ydcH
ydcI	ydcI
ydcJ	ydcJ
ydcK	ydcK
ydcL	ydcL
ydcM	ydcM
ydcO	ydcO
ydcP	ydcP
ydcR	ydcR
ydcSTUV-patD	ydcS,ydcT,ydcU,ydcV,patD
ydcY	ydcY
yddAB	yddA,yddB
yddE	yddE
yddG	yddG
yddH	yddH
yddLKJ	yddL,yddK,yddJ
yddM	yddM
yddW	yddW
ydeA	ydeA
ydeE	ydeE
ydeI	ydeI
ydeJ	ydeJ
ydeK	ydeK
ydeNM	ydeN,ydeM
ydeP	ydeP
ydeQ	ydeQ
ydeTSR	ydeT,ydeS,ydeR
ydeU	ydeU
ydfABC	ydfA,ydfB,ydfC
ydfG	ydfG
ydfH	ydfH
ydfI	ydfI
ydfJ	ydfJ
ydfK	ydfK
ydfUT	ydfU,ydfT
ydfV	ydfV
ydfZ	ydfZ
ydgA	ydgA
ydgC	ydgC
ydgD	ydgD
ydgH	ydgH
ydgI-folM	ydgI,folM
ydgJ	ydgJ
ydgK-rsxABCDGE-nth	ydgK,rsxA,rsxB,rsxC,rsxD,rsxG,rsxE,nth
ydhB	ydhB
ydhC	ydhC
ydhF	ydhF
ydhIJK	ydhI,ydhJ,ydhK
ydhL	ydhL
ydhP	ydhP
ydhQ	ydhQ
ydhR	ydhR
ydhS	ydhS
ydhYVWXUT	ydhY,ydhV,ydhW,ydhX,ydhU,ydhT
ydhZ	ydhZ
ydiE	ydiE
ydiFO	ydiF,ydiO
ydiJ-menI-ydiH	ydiJ,menI,ydiH
ydiK	ydiK
ydiL	ydiL
ydiM	ydiM
ydiNB-aroD	ydiN,ydiB,aroD
ydiP	ydiP
ydiQRST-fadK	ydiQ,ydiR,ydiS,ydiT,fadK
ydiU	ydiU
ydiV	ydiV
ydiY	ydiY
ydiZ	ydiZ
ydjA-selD-topB	ydjA,selD,topB
ydjE	ydjE
ydjF	ydjF
ydjLKJIHG	ydjL,ydjK,ydjJ,ydjI,ydjH,ydjG
ydjM	ydjM
ydjO	ydjO
ydjXYZ-ynjABCD	ydjX,ydjY,ydjZ,ynjA,ynjB,ynjC,ynjD
yeaC	yeaC
yeaE	yeaE
yeaGH	yeaG,yeaH
yeaK	yeaK
yeaL	yeaL
yeaO	yeaO
yeaQ	yeaQ
yeaR-yoaG	yeaR,yoaG
yeaVW	yeaV,yeaW
yeaX	yeaX
yebB	yebB
yebE	yebE
yebF	yebF
yebG	yebG
yebK	yebK
yebO	yebO
yebQ	yebQ
yebST	yebS,yebT
yebV	yebV
yebW	yebW
yecA	yecA
yecDE	yecD,yecE
yecF	yecF
yecH	yecH
yecJ	yecJ
yecM-cutC	yecM,cutC
yecN-cmoAB	yecN,cmoA,cmoB
yecR	yecR
[truncated: 631 more rows]

## Sheet: Regulations (RegulonDB)
Regulator	Regulator locus tag	mode	gene	locus tag
NhaR	b0020	activation	nhaA	b0019
NhaR	b0020	activation	nhaR	b0020
NhaR	b0020	activation	osmC	b1482
NhaR	b0020	activation	pgaA	b1024
NhaR	b0020	activation	pgaB	b1023
NhaR	b0020	activation	pgaC	b1022
NhaR	b0020	activation	pgaD	b1021
CaiF	b0034	activation	caiA	b0039
CaiF	b0034	activation	caiB	b0038
CaiF	b0034	activation	caiC	b0037
CaiF	b0034	activation	caiD	b0036
CaiF	b0034	activation	caiE	b0035
CaiF	b0034	activation	caiT	b0040
CaiF	b0034	activation	fixA	b0041
CaiF	b0034	activation	fixB	b0042
CaiF	b0034	activation	fixC	b0043
CaiF	b0034	activation	fixX	b0044
AraC	b0064	activation	araA	b0062
AraC	b0064	activation	araB	b0063
AraC	b0064	activation	araC	b0064
AraC	b0064	activation	araD	b0061
AraC	b0064	activation	araE	b2841
AraC	b0064	activation	araF	b1901
AraC	b0064	activation	araG	b1900
AraC	b0064	activation	araH	b4460
AraC	b0064	activation	araJ	b0396
AraC	b0064	activation	ygeA	b2840
AraC	b0064	repression	xylA	b3565
AraC	b0064	repression	xylB	b3564
AraC	b0064	repression	ydeM	b1497
AraC	b0064	repression	ydeN	b1498
SgrR	b0069	activation	sgrS	#N/A
SgrR	b0069	activation	alaC	b2379
SgrR	b0069	activation	setA	b0070
SgrR	b0069	activation	sgrT	b4662
SgrR	b0069	repression	sroA	#N/A
SgrR	b0069	repression	sgrR	b0069
SgrR	b0069	repression	tbpA	b0068
SgrR	b0069	repression	thiP	b0067
SgrR	b0069	repression	thiQ	b0066
LeuO	b0076	activation	bglB	b3721
LeuO	b0076	activation	bglF	b3722
LeuO	b0076	activation	bglG	b3723
LeuO	b0076	activation	bglJ	b4366
LeuO	b0076	activation	cas1	b2755
LeuO	b0076	activation	cas2	b2754
LeuO	b0076	activation	casA	b2760
LeuO	b0076	activation	casB	b2759
LeuO	b0076	activation	casC	b2758
LeuO	b0076	activation	casD	b2757
LeuO	b0076	activation	casE	b2756
LeuO	b0076	activation	leuA	b0074
LeuO	b0076	activation	leuB	b0073
LeuO	b0076	activation	leuC	b0072
LeuO	b0076	activation	leuD	b0071
LeuO	b0076	activation	leuL	b0075
LeuO	b0076	activation	leuO	b0076
LeuO	b0076	activation	yjjQ	b4365
LeuO	b0076	repression	dsrA	#N/A
LeuO	b0076	repression	cadC	b4133
Cra	b0080	activation	aceA	b4015
Cra	b0080	activation	aceB	b4014
Cra	b0080	activation	aceK	b4016
Cra	b0080	activation	acnA	b1276
Cra	b0080	activation	aroP	b0112
Cra	b0080	activation	betA	b0311
Cra	b0080	activation	betB	b0312
Cra	b0080	activation	betI	b0313
Cra	b0080	activation	betT	b0314
Cra	b0080	activation	crp	b3357
Cra	b0080	activation	crr	b2417
Cra	b0080	activation	csgD	b1040
Cra	b0080	activation	csgE	b1039
Cra	b0080	activation	csgF	b1038
Cra	b0080	activation	csgG	b1037
Cra	b0080	activation	cydA	b0733
Cra	b0080	activation	cydB	b0734
Cra	b0080	activation	icd	b1136
Cra	b0080	activation	pck	b3403
Cra	b0080	activation	poxB	b0871
Cra	b0080	activation	ppsA	b1702
Cra	b0080	activation	ptsH	b2415
Cra	b0080	activation	ptsI	b2416
Cra	b0080	repression	sgrS	#N/A
Cra	b0080	repression	aceE	b0114
Cra	b0080	repression	aceF	b0115
Cra	b0080	repression	acnB	b0118
Cra	b0080	repression	adhE	b1241
Cra	b0080	repression	cyoA	b0432
Cra	b0080	repression	cyoB	b0431
Cra	b0080	repression	cyoC	b0430
Cra	b0080	repression	cyoD	b0429
Cra	b0080	repression	cyoE	b0428
Cra	b0080	repression	cysG	b3368
Cra	b0080	repression	eda	b1850
Cra	b0080	repression	edd	b1851
Cra	b0080	repression	eno	b2779
Cra	b0080	repression	envC	b3613
Cra	b0080	repression	epd	b2927
Cra	b0080	repression	fbaA	b2925
Cra	b0080	repression	fbaB	b2097
Cra	b0080	repression	fruA	b2167
Cra	b0080	repression	fruB	b2169
Cra	b0080	repression	fruK	b2168
Cra	b0080	repression	gapA	b1779
Cra	b0080	repression	glcC	b2980
Cra	b0080	repression	glk	b2388
Cra	b0080	repression	gpmM	b3612
Cra	b0080	repression	hypF	b2712
Cra	b0080	repression	lpd	b0116
Cra	b0080	repression	manX	b1817
Cra	b0080	repression	manY	b1818
Cra	b0080	repression	manZ	b1819
Cra	b0080	repression	marA	b1531
Cra	b0080	repression	marB	b1532
Cra	b0080	repression	marR	b1530
Cra	b0080	repression	mpl	b4233
Cra	b0080	repression	mtlA	b3599
Cra	b0080	repression	mtlD	b3600
Cra	b0080	repression	mtlR	b3601
Cra	b0080	repression	nirB	b3365
Cra	b0080	repression	nirC	b3367
Cra	b0080	repression	nirD	b3366
Cra	b0080	repression	pdeL	b0315
Cra	b0080	repression	pdhR	b0113
Cra	b0080	repression	pfkA	b3916
Cra	b0080	repression	pgk	b2926
Cra	b0080	repression	ppc	b3956
Cra	b0080	repression	prpB	b0331
Cra	b0080	repression	prpC	b0333
Cra	b0080	repression	prpD	b0334
Cra	b0080	repression	prpE	b0335
Cra	b0080	repression	pykF	b1676
Cra	b0080	repression	setA	b0070
Cra	b0080	repression	sgrT	b4662
Cra	b0080	repression	tpiA	b3919
Cra	b0080	repression	yeaD	b1780
Cra	b0080	repression	yibQ	b3614
Cra	b0080	repression	zwf	b1852
MraZ	b0081	repression	ddlB	b0092
MraZ	b0081	repression	ftsA	b0094
MraZ	b0081	repression	ftsI	#N/A
MraZ	b0081	repression	ftsL	#N/A
MraZ	b0081	repression	ftsQ	b0093
MraZ	b0081	repression	ftsW	b0089
MraZ	b0081	repression	ftsZ	b0095
MraZ	b0081	repression	lpxC	b0096
MraZ	b0081	repression	mioC	b3742
MraZ	b0081	repression	mraY	b0087
MraZ	b0081	repression	mraZ	b0081
MraZ	b0081	repression	murC	b0091
MraZ	b0081	repression	murD	b0088
MraZ	b0081	repression	murE	#N/A
MraZ	b0081	repression	murF	#N/A
MraZ	b0081	repression	murG	b0090
MraZ	b0081	repression	rsmH	b0082
PdhR	b0113	activation	fecA	b4291
PdhR	b0113	activation	fecB	b4290
PdhR	b0113	activation	fecC	b4289
PdhR	b0113	activation	fecD	b4288
PdhR	b0113	activation	fecE	b4287
PdhR	b0113	repression	aceE	b0114
PdhR	b0113	repression	aceF	b0115
PdhR	b0113	repression	cyoA	b0432
PdhR	b0113	repression	cyoB	b0431
PdhR	b0113	repression	cyoC	b0430
PdhR	b0113	repression	cyoD	b0429
PdhR	b0113	repression	cyoE	b0428
PdhR	b0113	repression	ddlB	b0092
PdhR	b0113	repression	ftsA	b0094
PdhR	b0113	repression	ftsI	#N/A
PdhR	b0113	repression	ftsL	#N/A
PdhR	b0113	repression	ftsQ	b0093
PdhR	b0113	repression	ftsW	b0089
PdhR	b0113	repression	ftsZ	b0095
PdhR	b0113	repression	glcA	b2975
PdhR	b0113	repression	glcB	b2976
PdhR	b0113	repression	glcD	b2979
PdhR	b0113	repression	glcE	b4468
PdhR	b0113	repression	glcF	b4467
PdhR	b0113	repression	glcG	b2977
PdhR	b0113	repression	grcA	b2579
PdhR	b0113	repression	hemL	b0154
PdhR	b0113	repression	hha	b0460
PdhR	b0113	repression	lpd	b0116
PdhR	b0113	repression	lpxC	b0096
PdhR	b0113	repression	mraY	b0087
PdhR	b0113	repression	mraZ	b0081
PdhR	b0113	repression	murC	b0091
PdhR	b0113	repression	murD	b0088
PdhR	b0113	repression	murE	#N/A
PdhR	b0113	repression	murF	#N/A
PdhR	b0113	repression	murG	b0090
PdhR	b0113	repression	ndh	b1109
PdhR	b0113	repression	pdhR	b0113
PdhR	b0113	repression	rsmH	b0082
PdhR	b0113	repression	tomB	b0461
CdaR	b0162	activation	rnpB	#N/A
CdaR	b0162	activation	cdaR	b0162
CdaR	b0162	activation	garD	b3128
CdaR	b0162	activation	garK	b3124
CdaR	b0162	activation	garL	b3126
CdaR	b0162	activation	garP	b3127
CdaR	b0162	activation	garR	b3125
CdaR	b0162	activation	gudD	b2787
CdaR	b0162	activation	gudP	b2789
CdaR	b0162	activation	gudX	b2788
RclR	b0305	activation	rclA	b0304
RclR	b0305	activation	rclB	b0303
RclR	b0305	activation	rclC	b0301
BetI	b0313	repression	betA	b0311
BetI	b0313	repression	betB	b0312
BetI	b0313	repression	betI	b0313
BetI	b0313	repression	betT	b0314
PdeL	b0315	activation	pdeL	b0315
PrpR	b0330	activation	prpB	b0331
PrpR	b0330	activation	prpC	b0333
PrpR	b0330	activation	prpD	b0334
PrpR	b0330	activation	prpE	b0335
PrpR	b0330	repression	prpR	b0330
CynR	b0338	activation	cynS	b0340
CynR	b0338	activation	cynT	b0339
CynR	b0338	activation	cynX	b0341
CynR	b0338	repression	cynR	b0338
LacI	b0345	repression	lacA	b0342
LacI	b0345	repression	lacY	b0343
LacI	b0345	repression	lacZ	b0344
MhpR	b0346	activation	mhpA	b0347
MhpR	b0346	activation	mhpB	b0348
MhpR	b0346	activation	mhpC	b0349
MhpR	b0346	activation	mhpD	b0350
MhpR	b0346	activation	mhpE	b0352
MhpR	b0346	activation	mhpF	b0351
PhoB	b0399	activation	adiC	b4115
PhoB	b0399	activation	amn	b1982
PhoB	b0399	activation	argP	b2916
PhoB	b0399	activation	asr	b1597
PhoB	b0399	activation	cusA	b0575
PhoB	b0399	activation	cusB	b0574
PhoB	b0399	activation	cusC	b0572
PhoB	b0399	activation	cusF	b0573
PhoB	b0399	activation	cusR	b0571
PhoB	b0399	activation	cusS	b0570
PhoB	b0399	activation	gadW	b3515
PhoB	b0399	activation	gadX	b3516
PhoB	b0399	activation	mipA	b1782
PhoB	b0399	activation	ompF	b0929
PhoB	b0399	activation	phnC	b4106
PhoB	b0399	activation	phnD	b4105
PhoB	b0399	activation	phnE_1	b4104
PhoB	b0399	activation	phnE_2	0
PhoB	b0399	activation	phnF	b4102
PhoB	b0399	activation	phnG	b4101
PhoB	b0399	activation	phnH	b4100
PhoB	b0399	activation	phnI	b4099
PhoB	b0399	activation	phnJ	b4098
PhoB	b0399	activation	phnK	b4097
PhoB	b0399	activation	phnL	b4096
PhoB	b0399	activation	phnM	b4095
PhoB	b0399	activation	phnN	b4094
PhoB	b0399	activation	phnO	b4093
PhoB	b0399	activation	phnP	b4092
PhoB	b0399	activation	phoA	b0383
PhoB	b0399	activation	phoB	b0399
PhoB	b0399	activation	phoE	b0241
PhoB	b0399	activation	phoH	b1020
PhoB	b0399	activation	phoQ	b1129
PhoB	b0399	activation	phoR	b0400
PhoB	b0399	activation	phoU	b3724
PhoB	b0399	activation	psiE	b4030
PhoB	b0399	activation	psiF	b0384
PhoB	b0399	activation	pstA	b3726
PhoB	b0399	activation	pstB	b3725
PhoB	b0399	activation	pstC	b3727
PhoB	b0399	activation	pstS	b3728
PhoB	b0399	activation	tktB	b2465
PhoB	b0399	activation	ugpA	b3452
PhoB	b0399	activation	ugpB	b3453
PhoB	b0399	activation	ugpC	b3450
PhoB	b0399	activation	ugpE	b3451
PhoB	b0399	activation	ugpQ	b3449
PhoB	b0399	activation	waaH	b3615
PhoB	b0399	activation	ydfH	b1540
PhoB	b0399	activation	yedX	b1970
PhoB	b0399	activation	yegH	b2063
PhoB	b0399	activation	yhjC	b3521
PhoB	b0399	repression	cra	b0080
PhoB	b0399	repression	eda	b1850
PhoB	b0399	repression	feaR	b1384
PhoB	b0399	repression	pitB	b2987
PhoB	b0399	repression	prpR	b0330
PhoB	b0399	repression	sbcC	b0397
PhoB	b0399	repression	sbcD	b0398
NrdR	b0413	repression	nrdA	b2234
NrdR	b0413	repression	nrdB	b2235
NrdR	b0413	repression	nrdD	b4238
NrdR	b0413	repression	nrdE	b2675
NrdR	b0413	repression	nrdF	b2676
NrdR	b0413	repression	nrdG	b4237
NrdR	b0413	repression	nrdH	b2673
NrdR	b0413	repression	nrdI	b2674
NrdR	b0413	repression	yfaE	b2236
BolA	b0435	dual	ampC	b4150
BolA	b0435	dual	dacC	b0839
AcrR	b0464	repression	micF	#N/A
AcrR	b0464	repression	acrA	b0463
AcrR	b0464	repression	acrB	b0462
AcrR	b0464	repression	acrR	b0464
AcrR	b0464	repression	flhC	b1891
AcrR	b0464	repression	flhD	b1892
AcrR	b0464	repression	marA	b1531
AcrR	b0464	repression	marB	b1532
AcrR	b0464	repression	marR	b1530
AcrR	b0464	repression	soxR	b4063
AcrR	b0464	repression	soxS	b4062
CueR	b0487	activation	copA	b0484
CueR	b0487	activation	cueO	b0123
CueR	b0487	repression	moaA	b0781
CueR	b0487	repression	moaB	b0782
CueR	b0487	repression	moaC	b0783
CueR	b0487	repression	moaD	b0784
CueR	b0487	repression	moaE	b0785
AllS	b0504	activation	allC	b0516
AllS	b0504	activation	allD	b0517
AllS	b0504	activation	allE	b0515
AllR	b0506	repression	allA	b0505
AllR	b0506	repression	allB	b0512
AllR	b0506	repression	allS	b0504
AllR	b0506	repression	gcl	b0507
AllR	b0506	repression	glxK	b0514
AllR	b0506	repression	glxR	b0509
AllR	b0506	repression	hyi	b0508
AllR	b0506	repression	ybbW	b0511
AllR	b0506	repression	ybbY	b0513
AppY	b0564	activation	appA	b0980
AppY	b0564	activation	appB	b0979
AppY	b0564	activation	appC	b0978
AppY	b0564	activation	appX	b4592
AppY	b0564	activation	hyaA	b0972
AppY	b0564	activation	hyaB	b0973
AppY	b0564	activation	hyaC	b0974
AppY	b0564	activation	hyaD	b0975
AppY	b0564	activation	hyaE	b0976
AppY	b0564	activation	hyaF	b0977
EnvY	b0566	activation	ompC	b2215
EnvY	b0566	activation	ompF	b0929
CusR	b0571	activation	cusA	b0575
CusR	b0571	activation	cusB	b0574
CusR	b0571	activation	cusC	b0572
CusR	b0571	activation	cusF	b0573
CusR	b0571	activation	cusR	b0571
CusR	b0571	activation	cusS	b0570
CusR	b0571	activation	cyoA	b0432
CusR	b0571	activation	cyoB	b0431
CusR	b0571	activation	cyoC	b0430
CusR	b0571	activation	cyoD	b0429
CusR	b0571	activation	cyoE	b0428
CusR	b0571	activation	yedX	b1970
DpiA	b0620	activation	citC	b0618
DpiA	b0620	activation	citD	b0617
DpiA	b0620	activation	citE	b0616
DpiA	b0620	activation	citF	b0615
DpiA	b0620	activation	citG	b0613
DpiA	b0620	activation	citX	b0614
DpiA	b0620	activation	dpiA	b0620
DpiA	b0620	activation	dpiB	b0619
DpiA	b0620	activation	exuT	b3093
DpiA	b0620	activation	mdh	b3236
DpiA	b0620	repression	appY	b0564
NagC	b0676	unknown	feoA	b3408
NagC	b0676	unknown	feoB	b3409
NagC	b0676	unknown	feoC	b3410
NagC	b0676	activation	fimB	b4312
NagC	b0676	activation	glmS	b3729
NagC	b0676	activation	glmU	b3730
NagC	b0676	repression	chbA	b1736
NagC	b0676	repression	chbB	b1738
NagC	b0676	repression	chbC	b1737
NagC	b0676	repression	chbF	b1734
NagC	b0676	repression	chbG	b1733
NagC	b0676	repression	chbR	b1735
NagC	b0676	repression	chiP	b0681
NagC	b0676	repression	creA	b4397
NagC	b0676	repression	creB	b4398
NagC	b0676	repression	creC	b4399
NagC	b0676	repression	creD	b4400
NagC	b0676	repression	crr	b2417
NagC	b0676	repression	dinI	b1061
NagC	b0676	repression	galP	b2943
NagC	b0676	repression	manX	b1817
NagC	b0676	repression	manY	b1818
NagC	b0676	repression	manZ	b1819
NagC	b0676	repression	nagA	b0677
NagC	b0676	repression	nagB	b0678
NagC	b0676	repression	nagC	b0676
NagC	b0676	repression	nagE	b0679
NagC	b0676	repression	nanC	b4311
NagC	b0676	repression	nanM	b4310
NagC	b0676	repression	nanS	b4309
NagC	b0676	repression	ptsH	b2415
NagC	b0676	repression	ptsI	b2416
NagC	b0676	repression	umpH	b0675
NagC	b0676	repression	ybfN	b0682
NagC	b0676	repression	ydeM	b1497
NagC	b0676	repression	ydeN	b1498
NagC	b0676	repression	ydeP	b1501
Fur	b0683	activation	ftnA	b1905
Fur	b0683	activation	fumB	b4122
Fur	b0683	activation	katE	b1732
Fur	b0683	activation	katG	b3942
Fur	b0683	activation	mntP	b1821
Fur	b0683	activation	ompF	b0929
Fur	b0683	activation	sdhA	b0723
Fur	b0683	activation	sdhB	b0724
Fur	b0683	activation	sdhC	b0721
Fur	b0683	activation	sdhD	b0722
Fur	b0683	activation	sucA	b0726
Fur	b0683	activation	sucB	b0727
Fur	b0683	activation	sucC	b0728
Fur	b0683	activation	sucD	b0729
Fur	b0683	activation	tonB	b1252
Fur	b0683	activation	zinT	b1973
Fur	b0683	dual	amtB	b0451
Fur	b0683	dual	entS	b0591
Fur	b0683	dual	gdhA	b1761
Fur	b0683	dual	glnK	b0450
Fur	b0683	dual	lpd	b0116
Fur	b0683	repression	rnpB	#N/A
Fur	b0683	repression	ryhB	#N/A
Fur	b0683	repression	aspC	b0928
Fur	b0683	repression	cirA	b2155
Fur	b0683	repression	crl	b0240
Fur	b0683	repression	cyoA	b0432
Fur	b0683	repression	cyoB	b0431
Fur	b0683	repression	cyoC	b0430
Fur	b0683	repression	cyoD	b0429
Fur	b0683	repression	cyoE	b0428
Fur	b0683	repression	entA	b0596
Fur	b0683	repression	entB	b0595
Fur	b0683	repression	entC	b0593
Fur	b0683	repression	entD	b0583
Fur	b0683	repression	entE	b0594
Fur	b0683	repression	entF	b0586
Fur	b0683	repression	entH	b0597
Fur	b0683	repression	exbB	b3006
Fur	b0683	repression	exbD	b3005
Fur	b0683	repression	fecA	b4291
Fur	b0683	repression	fecB	b4290
Fur	b0683	repression	fecC	b4289
Fur	b0683	repression	fecD	b4288
Fur	b0683	repression	fecE	b4287
Fur	b0683	repression	fecI	b4293
Fur	b0683	repression	fecR	b4292
Fur	b0683	repression	feoA	b3408
Fur	b0683	repression	feoB	b3409
Fur	b0683	repression	feoC	b3410
Fur	b0683	repression	fepA	b0584
Fur	b0683	repression	fepB	b0592
Fur	b0683	repression	fepC	b0588
Fur	b0683	repression	fepD	b0590
Fur	b0683	repression	fepE	b0587
Fur	b0683	repression	fepG	b0589
Fur	b0683	repression	fes	b0585
Fur	b0683	repression	fhuA	b0150
Fur	b0683	repression	fhuB	b0153
Fur	b0683	repression	fhuC	b0151
Fur	b0683	repression	fhuD	b0152
Fur	b0683	repression	fhuE	b1102
Fur	b0683	repression	fhuF	b4367
Fur	b0683	repression	fiu	b0805
Fur	b0683	repression	flhC	b1891
Fur	b0683	repression	flhD	b1892
Fur	b0683	repression	fnr	b1334
Fur	b0683	repression	fumC	b1611
Fur	b0683	repression	fur	b0683
Fur	b0683	repression	garK	b3124
Fur	b0683	repression	garL	b3126
Fur	b0683	repression	garP	b3127
Fur	b0683	repression	garR	b3125
Fur	b0683	repression	glnD	b0167
Fur	b0683	repression	gltB	b3212
Fur	b0683	repression	gltD	b3213
Fur	b0683	repression	gltF	b3214
Fur	b0683	repression	gnd	b2029
Fur	b0683	repression	gpmA	b0755
Fur	b0683	repression	grcA	b2579
Fur	b0683	repression	gspC	b3324
Fur	b0683	repression	gspD	b3325
Fur	b0683	repression	gspE	b3326
Fur	b0683	repression	gspF	b3327
Fur	b0683	repression	gspG	b3328
Fur	b0683	repression	gspH	b3329
Fur	b0683	repression	gspI	b3330
Fur	b0683	repression	gspJ	b3331
Fur	b0683	repression	gspK	b3332
Fur	b0683	repression	gspL	b3333
Fur	b0683	repression	gspM	b3334
Fur	b0683	repression	gspO	b3335
Fur	b0683	repression	hmp	b2552
Fur	b0683	repression	metH	b4019
Fur	b0683	repression	metJ	b3938
Fur	b0683	repression	mntH	b2392
Fur	b0683	repression	nac	b1988
Fur	b0683	repression	ndh	b1109
Fur	b0683	repression	nohA	b1548
Fur	b0683	repression	nrdE	b2675
Fur	b0683	repression	nrdF	b2676
Fur	b0683	repression	nrdH	b2673
Fur	b0683	repression	nrdI	b2674
Fur	b0683	repression	oppA	b1243
Fur	b0683	repression	oppB	b1244
Fur	b0683	repression	oppC	b1245
Fur	b0683	repression	oppD	b1246
Fur	b0683	repression	oppF	b1247
Fur	b0683	repression	purR	b1658
Fur	b0683	repression	pyrC	b1062
Fur	b0683	repression	rcnA	b2106
Fur	b0683	repression	rcnB	b2107
Fur	b0683	repression	rpoS	b2741
Fur	b0683	repression	sodA	b3908
Fur	b0683	repression	soxR	b4063
Fur	b0683	repression	soxS	b4062
Fur	b0683	repression	sufA	b1684
Fur	b0683	repression	sufB	b1683
Fur	b0683	repression	sufC	b1682
Fur	b0683	repression	sufD	b1681
Fur	b0683	repression	sufE	b1679
Fur	b0683	repression	sufS	b1680
Fur	b0683	repression	tfaQ	b1546
Fur	b0683	repression	ybdZ	b4511
Fur	b0683	repression	ydfN	b1547
Fur	b0683	repression	ygaC	b2671
Fur	b0683	repression	yhhY	b3441
Fur	b0683	repression	yjjZ	b4567
Fur	b0683	repression	yqjH	b3070
Fur	b0683	repression	zwf	b1852
KdpE	b0694	activation	kdpA	b0698
KdpE	b0694	activation	kdpB	b0697
KdpE	b0694	activation	kdpC	b0696
KdpE	b0694	activation	kdpF	b4513
MngR	b0730	repression	mngA	b0731
MngR	b0730	repression	mngB	b0732
MngR	b0730	repression	mngR	b0730
ModE	b0761	activation	ccmA	b2201
ModE	b0761	activation	ccmB	b2200
ModE	b0761	activation	ccmC	b2199
ModE	b0761	activation	ccmD	b2198
ModE	b0761	activation	ccmE	b2197
ModE	b0761	activation	ccmF	b2196
ModE	b0761	activation	ccmG	b2195
ModE	b0761	activation	ccmH	b2194
ModE	b0761	activation	hycA	b2725
ModE	b0761	activation	hycB	b2724
ModE	b0761	activation	hycC	b2723
ModE	b0761	activation	hycD	b2722
ModE	b0761	activation	hycE	b2721
ModE	b0761	activation	hycF	b2720
ModE	b0761	activation	hycG	b2719
ModE	b0761	activation	hycH	b2718
ModE	b0761	activation	hycI	b2717
ModE	b0761	activation	moaA	b0781
ModE	b0761	activation	moaB	b0782
ModE	b0761	activation	moaC	b0783
ModE	b0761	activation	moaD	b0784
ModE	b0761	activation	moaE	b0785
ModE	b0761	activation	napA	b2206
ModE	b0761	activation	napB	b2203
ModE	b0761	activation	napC	b2202
ModE	b0761	activation	napD	b2207
ModE	b0761	activation	napF	b2208
ModE	b0761	activation	napG	b2205
ModE	b0761	activation	napH	b2204
ModE	b0761	activation	narL	b1221
ModE	b0761	activation	narX	b1222
ModE	b0761	repression	deoA	b4382
ModE	b0761	repression	deoB	b4383
ModE	b0761	repression	deoC	b4381
ModE	b0761	repression	deoD	b4384
ModE	b0761	repression	dmsA	b0894
ModE	b0761	repression	dmsB	b0895
ModE	b0761	repression	dmsC	b0896
ModE	b0761	repression	modA	b0763
ModE	b0761	repression	modB	b0764
ModE	b0761	repression	modC	b0765
ModE	b0761	repression	oppA	b1243
ModE	b0761	repression	oppB	b1244
ModE	b0761	repression	oppC	b1245
ModE	b0761	repression	oppD	b1246
ModE	b0761	repression	oppF	b1247
CecR	b0796	repression	cecR	b0796
CecR	b0796	repression	ybhF	b0794
CecR	b0796	repression	ybhG	b0795
CecR	b0796	repression	ybhR	b0792
CecR	b0796	repression	ybhS	b0793
MntR	b0817	activation	mntP	b1821
MntR	b0817	repression	rybA	#N/A
MntR	b0817	repression	dps	b0812
MntR	b0817	repression	mntH	b2392
MntR	b0817	repression	mntS	b4705
DeoR	b0840	repression	deoA	b4382
DeoR	b0840	repression	deoB	b4383
DeoR	b0840	repression	deoC	b4381
DeoR	b0840	repression	deoD	b4384
DeoR	b0840	repression	nupG	b2964
DeoR	b0840	repression	tsx	b0411
RcdA	b0846	activation	asr	b1597
RcdA	b0846	activation	bluF	b1163
RcdA	b0846	activation	csgD	b1040
RcdA	b0846	activation	csgE	b1039
RcdA	b0846	activation	csgF	b1038
RcdA	b0846	activation	csgG	b1037
RcdA	b0846	activation	ydeI	b1536
RcdA	b0846	repression	sulA	b0958
RcdA	b0846	repression	yagK	b0277
Lrp	b0889	activation	argO	b2923
Lrp	b0889	activation	aroA	b0908
Lrp	b0889	activation	cadA	b4131
Lrp	b0889	activation	cadB	b4132
Lrp	b0889	activation	csiD	b2659
Lrp	b0889	activation	fimA	b4314
Lrp	b0889	activation	fimC	b4316
Lrp	b0889	activation	fimD	b4317
Lrp	b0889	activation	fimE	b4313
Lrp	b0889	activation	fimF	b4318
Lrp	b0889	activation	fimG	b4319
Lrp	b0889	activation	fimH	b4320
Lrp	b0889	activation	fimI	b4315
Lrp	b0889	activation	gabD	b2661
Lrp	b0889	activation	gabP	b2663
Lrp	b0889	activation	gabT	b2662
Lrp	b0889	activation	gcvH	b2904
Lrp	b0889	activation	gcvP	b2903
Lrp	b0889	activation	gcvT	b2905
Lrp	b0889	activation	gltB	b3212
Lrp	b0889	activation	gltD	b3213
Lrp	b0889	activation	gltF	b3214
Lrp	b0889	activation	ilvH	b0078
Lrp	b0889	activation	ilvI	b0077
Lrp	b0889	activation	kbl	b3617
Lrp	b0889	activation	lhgO	b2660
Lrp	b0889	activation	lysP	b2156
Lrp	b0889	activation	malT	b3418
Lrp	b0889	activation	osmC	b1482
Lrp	b0889	activation	serA	b2913
Lrp	b0889	activation	serC	b0907
Lrp	b0889	activation	stpA	b2669
Lrp	b0889	activation	tdh	b3616
Lrp	b0889	activation	yeiL	b2163
Lrp	b0889	activation	yojI	b2211
Lrp	b0889	repression	alaT	#N/A
Lrp	b0889	repression	alaU	#N/A
Lrp	b0889	repression	alaV	#N/A
Lrp	b0889	repression	gltT	#N/A
Lrp	b0889	repression	gltU	#N/A
Lrp	b0889	repression	gltV	#N/A
Lrp	b0889	repression	gltW	#N/A
Lrp	b0889	repression	ileT	#N/A
Lrp	b0889	repression	ileU	#N/A
Lrp	b0889	repression	ileV	#N/A
Lrp	b0889	repression	micF	#N/A
Lrp	b0889	repression	rrfA	#N/A
Lrp	b0889	repression	rrfB	#N/A
Lrp	b0889	repression	rrfC	#N/A
Lrp	b0889	repression	rrfD	#N/A
Lrp	b0889	repression	rrfE	#N/A
Lrp	b0889	repression	rrfF	#N/A
Lrp	b0889	repression	rrfG	#N/A
Lrp	b0889	repression	rrfH	#N/A
Lrp	b0889	repression	rrlA	#N/A
Lrp	b0889	repression	rrlB	#N/A
Lrp	b0889	repression	rrlC	#N/A
Lrp	b0889	repression	rrlD	#N/A
Lrp	b0889	repression	rrlE	#N/A
Lrp	b0889	repression	rrlG	#N/A
Lrp	b0889	repression	rrlH	#N/A
Lrp	b0889	repression	rrsA	#N/A
Lrp	b0889	repression	rrsB	#N/A
Lrp	b0889	repression	rrsC	#N/A
Lrp	b0889	repression	rrsD	#N/A
Lrp	b0889	repression	rrsE	#N/A
Lrp	b0889	repression	rrsG	#N/A
Lrp	b0889	repression	rrsH	#N/A
Lrp	b0889	repression	ssrS	#N/A
Lrp	b0889	repression	thrV	#N/A
Lrp	b0889	repression	adhE	b1241
Lrp	b0889	repression	aidB	b4187
Lrp	b0889	repression	alaA	b2290
Lrp	b0889	repression	avtA	b3572
Lrp	b0889	repression	dadA	b1189
Lrp	b0889	repression	dadX	b1190
Lrp	b0889	repression	fau	b2912
Lrp	b0889	repression	hdeA	b3510
Lrp	b0889	repression	hdeB	b3509
Lrp	b0889	repression	ilvA	b3772
Lrp	b0889	repression	ilvD	b3771
Lrp	b0889	repression	ilvE	b3770
Lrp	b0889	repression	ilvG_1	0
Lrp	b0889	repression	ilvG_2	0
Lrp	b0889	repression	ilvL	b3766
Lrp	b0889	repression	ilvM	b3769
Lrp	b0889	repression	ilvX	b4669
Lrp	b0889	repression	leuE	b1798
Lrp	b0889	repression	livF	b3454
Lrp	b0889	repression	livG	b3455
Lrp	b0889	repression	livH	b3457
Lrp	b0889	repression	livJ	b3460
Lrp	b0889	repression	livK	b3458
Lrp	b0889	repression	livM	b3456
Lrp	b0889	repression	lrp	b0889
Lrp	b0889	repression	lysU	b4129
Lrp	b0889	repression	ompC	b2215
Lrp	b0889	repression	oppA	b1243
Lrp	b0889	repression	oppB	b1244
Lrp	b0889	repression	oppC	b1245
Lrp	b0889	repression	oppD	b1246
Lrp	b0889	repression	oppF	b1247
Lrp	b0889	repression	osmY	b4376
Lrp	b0889	repression	sdaA	b1814
Lrp	b0889	repression	yhiD	b3508
TorR	b0995	activation	hdeA	b3510
TorR	b0995	activation	hdeB	b3509
TorR	b0995	activation	tnaA	b3708
TorR	b0995	activation	tnaB	b3709
TorR	b0995	activation	tnaC	b3707
TorR	b0995	activation	torA	b0997
TorR	b0995	activation	torC	b0996
TorR	b0995	activation	torD	b0998
TorR	b0995	activation	yhiD	b3508
TorR	b0995	repression	gadA	b3517
TorR	b0995	repression	gadX	b3516
TorR	b0995	repression	torR	b0995
RutR	b1013	activation	carA	b0032
RutR	b1013	activation	carB	b0033
RutR	b1013	repression	fepB	b0592
RutR	b1013	repression	gadW	b3515
RutR	b1013	repression	gadX	b3516
RutR	b1013	repression	gloA	b1651
RutR	b1013	repression	nemA	b1650
RutR	b1013	repression	nemR	b1649
RutR	b1013	repression	pdeR	b1285
RutR	b1013	repression	rutA	b1012
RutR	b1013	repression	rutB	b1011
RutR	b1013	repression	rutC	b1010
RutR	b1013	repression	rutD	b1009
RutR	b1013	repression	rutE	b1008
RutR	b1013	repression	rutF	b1007
RutR	b1013	repression	rutG	b1006
RutR	b1013	repression	rutR	b1013
PutA	b1014	repression	putA	b1014
PutA	b1014	repression	putP	b1015
CsgD	b1040	activation	csgA	b1042
CsgD	b1040	activation	csgB	b1041
CsgD	b1040	activation	csgC	b1043
CsgD	b1040	activation	csgD	b1040
CsgD	b1040	activation	csgE	b1039
CsgD	b1040	activation	csgF	b1038
CsgD	b1040	activation	csgG	b1037
CsgD	b1040	activation	dgcC	b0385
CsgD	b1040	activation	iraP	b0382
CsgD	b1040	activation	nlpA	b3661
CsgD	b1040	activation	wrbA	b1004
CsgD	b1040	activation	yccJ	b1003
CsgD	b1040	activation	yccT	b0964
CsgD	b1040	repression	flgM	b1071
CsgD	b1040	repression	flgN	b1070
CsgD	b1040	repression	fliA	b1922
CsgD	b1040	repression	fliE	b1937
CsgD	b1040	repression	fliF	b1938
CsgD	b1040	repression	fliG	b1939
CsgD	b1040	repression	fliH	b1940
CsgD	b1040	repression	fliI	b1941
CsgD	b1040	repression	fliJ	b1942
CsgD	b1040	repression	fliK	b1943
CsgD	b1040	repression	fliZ	b1921
CsgD	b1040	repression	pepD	b0237
CsgD	b1040	repression	tcyJ	b1920
CsgD	b1040	repression	yhbS	b3156
CsgD	b1040	repression	yhbT	b3157
ComR	b1111	repression	bhsA	b1112
PhoP	b1130	activation	gadF	#N/A
PhoP	b1130	activation	mgrR	#N/A
PhoP	b1130	activation	borD	b0557
PhoP	b1130	activation	cysB	b1275
PhoP	b1130	activation	fadL	b2344
PhoP	b1130	activation	gadE	b3512
PhoP	b1130	activation	gadW	b3515
PhoP	b1130	activation	glgA	b3429
PhoP	b1130	activation	glgB	b3432
PhoP	b1130	activation	glgC	b3430
PhoP	b1130	activation	glgP	b3428
PhoP	b1130	activation	glgX	b3431
PhoP	b1130	activation	hdeA	b3510
PhoP	b1130	activation	hdeB	b3509
PhoP	b1130	activation	hdeD	b3511
PhoP	b1130	activation	hemL	b0154
PhoP	b1130	activation	iraM	b1160
PhoP	b1130	activation	malS	b3571
PhoP	b1130	activation	metB	b3939
PhoP	b1130	activation	metL	b3940
PhoP	b1130	activation	mgrB	b1826
PhoP	b1130	activation	mgtA	b4242
PhoP	b1130	activation	mgtL	b4702
PhoP	b1130	activation	nagA	b0677
PhoP	b1130	activation	ompT	b0565
PhoP	b1130	activation	pagP	b0622
PhoP	b1130	activation	phoP	b1130
PhoP	b1130	activation	phoQ	b1129
PhoP	b1130	activation	purD	b4005
PhoP	b1130	activation	purH	b4006
PhoP	b1130	activation	rstA	b1608
PhoP	b1130	activation	rstB	b1609
PhoP	b1130	activation	rutA	b1012
PhoP	b1130	activation	rutB	b1011
PhoP	b1130	activation	rutC	b1010
PhoP	b1130	activation	rutD	b1009
PhoP	b1130	activation	rutE	b1008
PhoP	b1130	activation	rutF	b1007
PhoP	b1130	activation	rutG	b1006
PhoP	b1130	activation	slyB	b1641
PhoP	b1130	activation	tolC	b3035
PhoP	b1130	activation	ybjG	b0841
PhoP	b1130	activation	ygiA	b3036
PhoP	b1130	activation	ygiB	b3037
PhoP	b1130	activation	ygiC	b3038
PhoP	b1130	activation	yhiD	b3508
PhoP	b1130	activation	yneM	b4599
PhoP	b1130	activation	yrbL	b3207
PhoP	b1130	repression	acrA	b0463
PhoP	b1130	repression	acrB	b0462
PhoP	b1130	repression	argD	b3359
PhoP	b1130	repression	dcuD	b3227
PhoP	b1130	repression	safA	b1500
PhoP	b1130	repression	treR	b4241
PhoP	b1130	repression	ydeO	b1499
PhoP	b1130	repression	ydeP	b1501
BluR	b1162	repression	ariR	b1166
BluR	b1162	repression	ycgZ	b1164
BluR	b1162	repression	ymgA	b1165
BluR	b1162	repression	ymgC	b1167
[truncated: 5,761 more rows]
